# Supplementary material for: Genome-Wide Analysis of R2R3-MYB Genes and Functional Characterization of SmMYB75 in Eggplant Fruit Implications for Crop Improvement and Nutritional Enhancement
Source: MDPI journal article supplement (doi:10.3390/ijms25021163), 2024-01-18
Supplement: s1 [file s1]

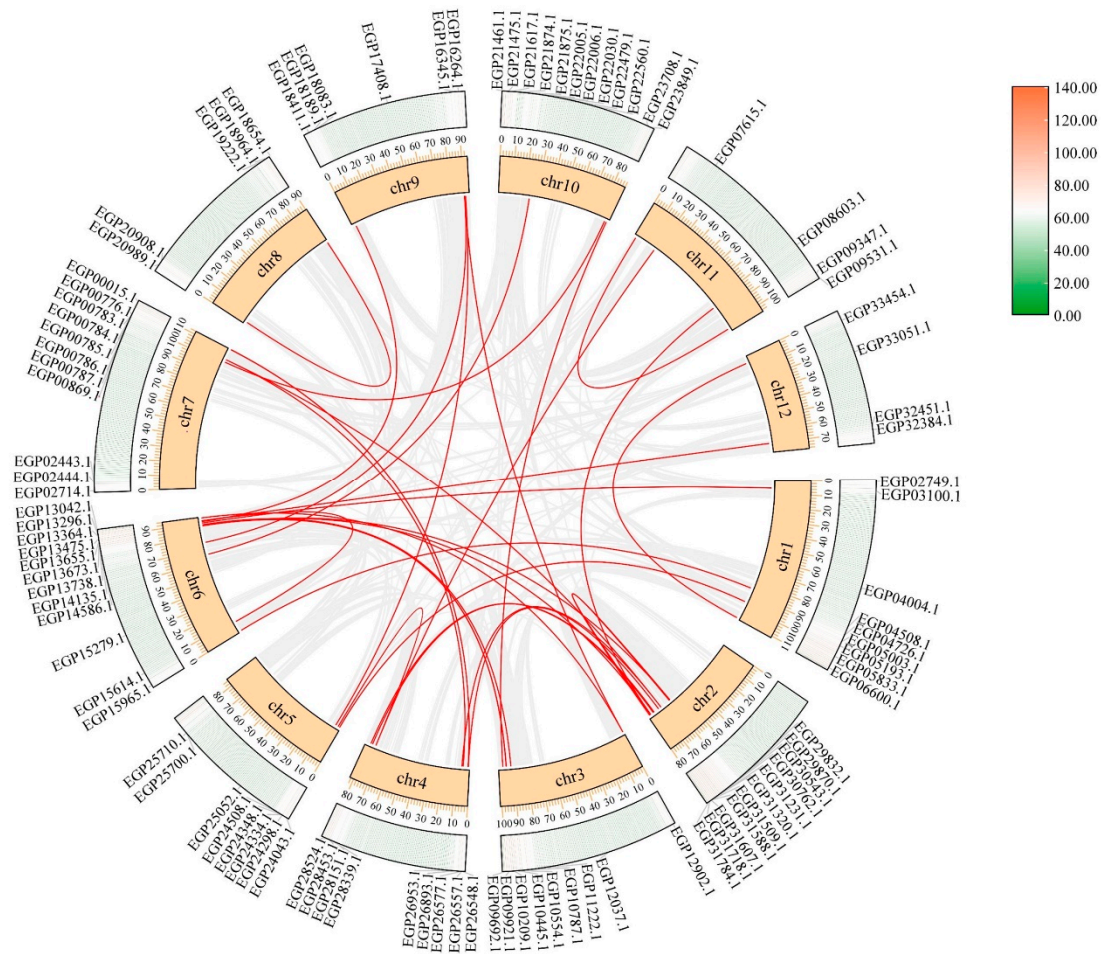

**Figure. S1.** Schematic representation of the inter-chromosomal correlation between the SmR2R3-MYB genes in eggplant. The red lines represent synthetic blocks in the eggplant genome. The outer circle represents the distribution of gene abundance on different chromosomes
