# Supplementary material for: Genome-Wide Analysis of R2R3-MYB Genes and Functional Characterization of SmMYB75 in Eggplant Fruit Implications for Crop Improvement and Nutritional Enhancement
Source: Int J Mol Sci. 2024 Jan 18;25(2):1163. doi: 10.3390/ijms25021163 (PMC10816229; doi:10.3390/ijms25021163)
Supplement: Supplementary file 1 [file ijms-25-01163-s001.zip › Table S1.xlsx]

## Sheet: Supplementary Table S1
Supplementary Table S1. qRT-PCR primers for detecting the response of eggplant R2R3-MYB gene to stress treatment.
Name	Sequence (5' - 3')
SmACTIN-F	GTCGGAATGGGACAGAAGGATG
SmACTIN-R	GTGCCTCAGTCAGGAGAACAGGGT
EGP10787-F	AACAGAAGTCCATTCACAGAAGAGG
EGP10787-R	TTCACAGCATTATCAGTACGTCCAG
EGP12902-F	TGGCAATAGATGGTCAGCAATAGC
EGP12902-R	TTGGAGTTCCGAGGAGACTGATG
EGP13655-F	GGCGAAACTCTGTTGTTGTTAAGG
EGP13655-R	ATTTAGGTACTGAACTCCAGCATCC
EGP16345-F	TCCAGAAATCGACGAGAGCTTTTG
EGP16345-R	GTCACCACCACCAACCATCATATC
EGP18654-F	AGTATTCGCACCAAAGCCCATAAG
EGP18654-R	GTCTTTTCCCACATCACCTTCTCC
EGP18964-F	TGATCCTGTTACACATGAACCACTC
EGP18964-R	GTACAACCACTACCTGCTGATGAC
EGP21874-F	CCAGGAAGGACAGCGAATGATG
EGP21874-R	TTACGAGGAGAAGGAAAAGAAGCAG
EGP21875-F	AATGACGACGCTGTTGAAGGAG
EGP21875-R	ACATTGTTCTTGTTGCATGGAGTTG
EGP23708-F	TCAATGCCAATGCCACCACTTC
EGP23708-R	TGGACGATTGTATTGAACGATGCTC
EGP23849-F	ATTGCTCAACATCTGCCAGGAAG
EGP23849-R	CTGTTTCTGTACCCTCGTTCTCC
EGP24508-F	AAGCAAGCAGGTTTATTAAGGTGTG
EGP24508-R	TCTGTTTCCAAGAAGTTCATGTAGC
EGP26953-F	AGAACGCTGGGCTTCAAAGATG
EGP26953-R	GCAAGTGGATGATTGTCTCTTCTTC
EGP02749-F	GGAAGAGTTGCCGCCTTAGATG
EGP02749-R	CCGCTATCAATGACCACCTGTTC
EGP28151-F	GGTGTGGCAAGAGTTGTAGATTAAG
EGP28151-R	TAAGTGTGTCGCAATGGCAGAC
EGP28524-F	CCAGCAATTACTTCAGCAACAACAG
EGP28524-R	ACTCCATACACGACCCGAATCC
EGP30543-F	ATGATGAGTGGCAATTAAGCAATGG
EGP30543-R	TCGGACGGTAGAGGATCATAGTATC
EGP30762-F	AGTTCAAGTCGGCTATATGAGTCTG
EGP30762-R	TCCAAACGTCGTCCCTGTTAAAG
EGP31607-F	ACTACCTCAGACCAGGAATCAAGAG
EGP31607-R	AGCCCATTTGTTGCCTAGAAGTG
EGP33454-F	GCAGGAAGATTACCAGGAAGAACAG
EGP33454-R	GTAGTAGTAGGCTCGTTGATTGACC
EGP04004-F	ATCTATGGATGCCGAGGCTAGTAG
EGP04004-R	GGCGGTATCGGTGGAGGTAG
EGP04508-F	GGCTGGAGGAGATTGATGATGAC
EGP04508-R	CTGCCTTGTTGCTAACTTCTTCTTG
EGP05003-F	AAGACTTCAATGCCACAGCCAAG
EGP05003-R	CAATACTGCGACACCACCAAAGG
EGP00776-F	TGAATTGCCAAATGCTACCTCCAC
EGP00776-R	ATTCTGATTGCTGCTGTTGTTGTTC
EGP00785-F	AATGGTCGGCGATTGCTGTTC
EGP00785-R	CTTTAGTGCTGTGTGCCAATGATTC
EGP00786-F	AATGGTCGAGGATTGCTGTTCAC
EGP00786-R	CTTCTTTAGTGTTGTGTGCCAGTG
EGP09347-F	AATCCACAACACCTTCAACATCTTC
EGP09347-R	CCAAAGTGCTGCTGAAATCATCATC
