# Supplementary material for: Genome-Wide Analysis of R2R3-MYB Genes and Functional Characterization of SmMYB75 in Eggplant Fruit Implications for Crop Improvement and Nutritional Enhancement
Source: Int J Mol Sci. 2024 Jan 18;25(2):1163. doi: 10.3390/ijms25021163 (PMC10816229; doi:10.3390/ijms25021163)
Supplement: Supplementary file 1 [file ijms-25-01163-s001.zip › Table S2.xlsx]

## Sheet: Supplementary Table S2
Supplementary Table S2a. The Ka/Ks ratios for tandem duplicated SmR2R3-MYB genes.
Gene 1	Chr.	Locus (start position (bp)-end position (bp))	Gene 2	Chr.	Locus (start position (bp)-end position (bp))	Ka	Ks	Ka/Ks
EGP00785.1	7	102992213-102993638	EGP00784.1	7	103036072-103037543	0.0260419	0.111596	0.233358
EGP00787.1	7	102937722-102939137	EGP00786.1	7	102982201-102984410	0.0334969	0.0491382	0.681687
EGP02444.1	7	4839861-4842651	EGP02443.1	7	4871122-4872132	0.0410102	0.165457	0.247861
EGP21874.1	10	7749651-7750889	EGP21875.1	10	7783887-7785252	0.259944	0.682564	0.380834
EGP22005.1	10	12531545-12533473	EGP22006.1	10	12553055-12556851	0.0384249	0.120363	0.319242
Supplementary Table S2b. The Ka/Ks ratios for segmentally duplicated SmR2R3-MYB genes.
Gene 1	Chr.	Locus (start position (bp)-end position (bp))	Gene 2	Chr.	Locus(start position (bp)-end position (bp))	Ka	Ks	Ka/Ks
EGP06600.1	1	110289736-110290871	EGP33454.1	12	5208936-5210485	0.120087	0.90272	0.133028
EGP05193.1	1	96467669-96471115	EGP24043.1	5	764628-766692	0.127185	0.628132	0.202481
EGP03100.1	1	5692155-5696318	EGP13475.1	6	89694618-89702610	0.225193	0.482647	0.466579
EGP04508.1	1	85047769-85050471	EGP15965.1	6	817603-825573	0.109312	1.14822	0.0952005
EGP23849.1	10	86417721-86419105	EGP09921.1	3	97927918-97929290	0.381905	3.24457	0.117706
EGP23708.1	10	84960050-84963194	EGP00869.1	7	101150670-101154445	0.277289	0.963003	0.287942
EGP07615.1	11	18725239-18726804	EGP28151.1	4	74662494-74664272	0.325973	1.59049	0.204951
EGP32384.1	12	69790691-69792166	EGP13296.1	6	91468446-91469961	0.216814	0.594112	0.364939
EGP29832.1	2	59121762-59125028	EGP31607.1	2	77844185-77846082	0.220082	1.00623	0.21872
EGP29870.1	2	59658060-59661796	EGP31718.1	2	78843208-78847350	0.170627	1.05493	0.161742
EGP31231.1	2	74559180-74560550	EGP28339.1	4	77492669-77494717	0.421978	2.18912	0.192762
EGP30543.1	2	68024232-68025878	EGP26953.1	4	5988053-5989530	0.182523	0.967418	0.18867
EGP31320.1	2	75278106-75279215	EGP28453.1	4	78836267-78838537	0.29081	2.71521	0.107104
EGP30762.1	2	70325752-70326878	EGP26548.1	4	1054600-1055932	0.237332	1.01034	0.234903
EGP29832.1	2	59121762-59125028	EGP13738.1	6	87516790-87519310	0.380067	1.91184	0.198796
EGP31607.1	2	77844185-77846082	EGP13738.1	6	87516790-87519310	0.290576	2.1594	0.134563
EGP30543.1	2	68024232-68025878	EGP00776.1	7	103261947-103263156	0.253554	2.67298	0.0948584
EGP10209.1	3	95292246-95294056	EGP13738.1	6	87516790-87519310	0.200903	1.01834	0.197285
EGP10554.1	3	91701928-91703526	EGP13655.1	6	88328759-88330870	0.195585	0.483158	0.404805
EGP12902.1	3	611659-613740	EGP16345.1	9	90025079-90027310	0.249748	0.961736	0.259685
EGP26893.1	4	4926700-4928613	EGP00776.1	7	103261947-103263156	0.149272	0.914123	0.163295
EGP26557.1	4	1160716-1161612	EGP00015.1	7	111868150-111869835	0.304219	1.28773	0.236245
EGP15614.1	6	8853072-8854699	EGP13296.1	6	91468446-91469961	0.239351	0.6812	0.351367
EGP13364.1	6	90851165-90853620	EGP18411.1	9	2663019-2665009	0.411489	1.12279	0.366486
EGP14586.1	6	74528599-74531596	EGP16345.1	9	90025079-90027310	0.225706	1.32811	0.169945
EGP20989.1	8	1894315-1900001	EGP18654.1	8	90132297-90133815	0.202176	1.70511	0.11857
