# Supplementary material for: Genome-Wide Analysis of R2R3-MYB Genes and Functional Characterization of SmMYB75 in Eggplant Fruit Implications for Crop Improvement and Nutritional Enhancement
Source: Int J Mol Sci. 2024 Jan 18;25(2):1163. doi: 10.3390/ijms25021163 (PMC10816229; doi:10.3390/ijms25021163)
Supplement: Supplementary file 1 [file ijms-25-01163-s001.zip › Table S3.xlsx]

## Sheet: Supplementary Table S3
Supplementary Table S3. Collinear relationships of R2R3-MYB family members between eggplant and five plant species.
Common collinear SmMYB gene pairs in Arabidopsis thaliana	Common collinear SmMYB gene pairs in Solanum lycopersicum	Common collinear SmMYB gene pairs in Solanum tuberosum	Common collinear SmMYB gene pairs in Oryza sativa L	Common collinear SmMYB gene pairs in Zea mays	Common collinear SmMYB gene pairs in Capsicum annuum L
EGP00015.1	EGP00015.1	EGP00015.1	EGP02714.1	EGP00776.1	EGP00015.1
EGP00776.1	EGP00776.1	EGP00776.1	EGP05833.1	EGP02714.1	EGP00776.1
EGP00869.1	EGP00787.1	EGP00787.1	EGP06600.1	EGP04508.1	EGP00869.1
EGP02714.1	EGP00869.1	EGP00869.1	EGP09692.1	EGP05003.1	EGP02444.1
EGP02749.1	EGP02444.1	EGP02444.1	EGP10787.1	EGP05833.1	EGP02714.1
EGP04004.1	EGP02714.1	EGP02714.1	EGP11222.1	EGP06600.1	EGP03100.1
EGP04508.1	EGP02749.1	EGP03100.1	EGP13042.1	EGP09692.1	EGP04508.1
EGP04726.1	EGP03100.1	EGP04004.1	EGP13296.1	EGP09921.1	EGP04726.1
EGP05003.1	EGP04004.1	EGP04508.1	EGP15965.1	EGP10209.1	EGP05003.1
EGP05193.1	EGP04508.1	EGP04726.1	EGP16264.1	EGP10554.1	EGP05193.1
EGP05833.1	EGP04726.1	EGP05003.1	EGP16345.1	EGP10787.1	EGP09347.1
EGP06600.1	EGP05003.1	EGP05193.1	EGP18083.1	EGP13042.1	EGP09531.1
EGP07615.1	EGP05193.1	EGP05833.1	EGP18189.1	EGP13296.1	EGP09921.1
EGP09692.1	EGP05833.1	EGP06600.1	EGP24298.1	EGP13655.1	EGP10209.1
EGP09921.1	EGP06600.1	EGP07615.1	EGP28151.1	EGP15965.1	EGP10445.1
EGP10209.1	EGP07615.1	EGP08603.1	EGP28339.1	EGP16264.1	EGP10554.1
EGP10445.1	EGP08603.1	EGP09347.1	EGP30543.1	EGP16345.1	EGP10787.1
EGP10787.1	EGP09347.1	EGP09531.1	EGP31718.1	EGP18083.1	EGP12902.1
EGP11222.1	EGP09531.1	EGP09692.1	EGP32384.1	EGP18189.1	EGP13042.1
EGP12902.1	EGP09692.1	EGP09921.1	EGP33454.1	EGP24298.1	EGP13296.1
EGP13042.1	EGP09921.1	EGP10209.1		EGP28151.1	EGP13364.1
EGP13296.1	EGP10209.1	EGP10445.1		EGP28339.1	EGP13475.1
EGP13364.1	EGP10445.1	EGP10554.1		EGP30543.1	EGP13655.1
EGP13475.1	EGP10554.1	EGP10787.1		EGP32384.1	EGP13738.1
EGP13673.1	EGP10787.1	EGP11222.1			EGP14135.1
EGP13738.1	EGP11222.1	EGP12902.1			EGP14586.1
EGP14135.1	EGP12902.1	EGP13042.1			EGP15614.1
EGP15614.1	EGP13042.1	EGP13296.1			EGP15965.1
EGP15965.1	EGP13296.1	EGP13364.1			EGP16264.1
EGP16264.1	EGP13364.1	EGP13475.1			EGP16345.1
EGP16345.1	EGP13475.1	EGP13655.1			EGP18083.1
EGP18083.1	EGP13655.1	EGP13673.1			EGP18189.1
EGP18189.1	EGP13673.1	EGP13738.1			EGP18411.1
EGP18411.1	EGP13738.1	EGP14135.1			EGP18654.1
EGP18964.1	EGP14135.1	EGP14586.1			EGP18964.1
EGP19222.1	EGP14586.1	EGP15614.1			EGP19222.1
EGP20989.1	EGP15614.1	EGP15965.1			EGP20908.1
EGP21617.1	EGP15965.1	EGP16264.1			EGP20989.1
EGP22030.1	EGP16264.1	EGP16345.1			EGP21461.1
EGP22479.1	EGP16345.1	EGP18083.1			EGP21475.1
EGP23708.1	EGP18083.1	EGP18189.1			EGP21617.1
EGP23849.1	EGP18189.1	EGP18411.1			EGP21874.1
EGP24298.1	EGP18411.1	EGP18654.1			EGP22005.1
EGP24334.1	EGP18654.1	EGP18964.1			EGP22030.1
EGP26557.1	EGP18964.1	EGP19222.1			EGP23708.1
EGP26577.1	EGP19222.1	EGP20989.1			EGP23849.1
EGP26893.1	EGP20908.1	EGP21461.1			EGP24043.1
EGP26953.1	EGP20989.1	EGP21475.1			EGP24298.1
EGP28151.1	EGP21461.1	EGP21617.1			EGP24334.1
EGP28339.1	EGP21475.1	EGP21874.1			EGP24348.1
EGP28453.1	EGP21617.1	EGP22005.1			EGP25700.1
EGP29832.1	EGP21874.1	EGP22030.1			EGP26548.1
EGP29870.1	EGP21875.1	EGP22479.1			EGP26557.1
EGP30543.1	EGP22005.1	EGP22560.1			EGP26577.1
EGP31231.1	EGP22030.1	EGP23708.1			EGP26893.1
EGP31320.1	EGP22479.1	EGP23849.1			EGP26953.1
EGP31509.1	EGP22560.1	EGP24043.1			EGP28339.1
EGP31588.1	EGP23708.1	EGP24298.1			EGP28453.1
EGP31607.1	EGP23849.1	EGP24334.1			EGP28524.1
EGP31718.1	EGP24043.1	EGP24348.1			EGP29832.1
EGP31784.1	EGP24298.1	EGP24508.1			EGP30543.1
EGP32384.1	EGP24334.1	EGP25700.1			EGP30762.1
EGP32451.1	EGP24348.1	EGP25710.1			EGP31231.1
EGP33454.1	EGP24508.1	EGP26548.1			EGP31320.1
	EGP25700.1	EGP26557.1			EGP31509.1
	EGP25710.1	EGP26577.1			EGP31588.1
	EGP26548.1	EGP26893.1			EGP31607.1
	EGP26557.1	EGP26953.1			EGP31718.1
	EGP26577.1	EGP28151.1			EGP31784.1
	EGP26893.1	EGP28339.1			EGP32384.1
	EGP26953.1	EGP28453.1			EGP32451.1
	EGP28151.1	EGP28524.1
	EGP28339.1	EGP29832.1
	EGP28453.1	EGP29870.1
	EGP28524.1	EGP30543.1
	EGP29832.1	EGP30762.1
	EGP29870.1	EGP31231.1
	EGP30543.1	EGP31320.1
	EGP30762.1	EGP31509.1
	EGP31231.1	EGP31588.1
	EGP31320.1	EGP31607.1
	EGP31509.1	EGP31718.1
	EGP31588.1	EGP31784.1
	EGP31607.1	EGP32384.1
	EGP31718.1	EGP32451.1
	EGP31784.1	EGP33454.1
	EGP32384.1
	EGP32451.1
	EGP33454.1
