# Supplementary material for: Genome-Wide Analysis of R2R3-MYB Genes and Functional Characterization of SmMYB75 in Eggplant Fruit Implications for Crop Improvement and Nutritional Enhancement
Source: Int J Mol Sci. 2024 Jan 18;25(2):1163. doi: 10.3390/ijms25021163 (PMC10816229; doi:10.3390/ijms25021163)
Supplement: Supplementary file 1 [file ijms-25-01163-s001.zip › Table S4.xlsx]

## Sheet: Supplementary Table S4
Supplementary Table S4. Types and contents of anthocyanins detected in the flesh of eggplant (ug/g).
Compounds	Class	WT-1	WT-2	WT-3	75-OE1	75-OE2	75-OE3
Cyanidin-3-O-(6-O-p-coumaroyl)-glucoside	Cyanidin	0	0	0	0.00420306445	0.00487605216	0.0028850928
Malvidin-3-O-(6-O-p-coumaroyl)-glucoside	Malvidin	0	0	0	0.00570747331	0.0059891721	0.00773171024
Rutin	flavonoid	0	0	0	0.0292963622	0.0127272871	0.0269353422
Kaempferol-3-O-rutinoside	flavonoid	0	0	0	0.191548438	0.13760324	0.195037517
Delphinidin-3-O-glucoside	Delphinidin	0	0	0	0.00877536576	0.00767907528	0
Cyanidin-3-O-rutinoside	Cyanidin	0.206417971	0	0	0	0	0
Pelargonidin-3-O-rutinoside	Pelargonidin	0.029291726	0	0	0	0	0
Procyanidin B3	Procyanidin	0.00755919902	0	0	0	0	0
Naringenin-7-O-glucoside	flavonoid	0	0	0	0	0	0.00790953901
Cyanidin-3,5-O-diglucoside	Cyanidin	0.00585791828	0.00584723456	0.00547965402	0.00586791222	0.00575903972	0.00595459988
Delphinidin-3-O-sophoroside	Delphinidin	0.00201582232	0.0000345952765	0.00124848437	0	0.00129689192	0.00203284773
