# Supplementary material for: Genome-Wide Analysis of R2R3-MYB Genes and Functional Characterization of SmMYB75 in Eggplant Fruit Implications for Crop Improvement and Nutritional Enhancement
Source: Int J Mol Sci. 2024 Jan 18;25(2):1163. doi: 10.3390/ijms25021163 (PMC10816229; doi:10.3390/ijms25021163)
Supplement: Supplementary file 1 [file ijms-25-01163-s001.zip › Table S5.xlsx]

## Sheet: Supplementary Table S5
Supplementary Table S5. List of all DEGs identified in SmMYB75-OE_vs_WT.
ID	WT-1_fpkm	WT-2_fpkm	WT-3_fpkm	75-OE1_fpkm	75-OE2_fpkm	75-OE3_fpkm	log2FoldChange	pvalue	gene_name	regulated
EGP02830	961.311	700.863	778.856	8.9581	10.8485	8.1384	-6.48571	0	EGP02830	down
EGP02831	804.538	588.996	666.116	7.8786	6.9698	6.3945	-6.63825	0	EGP02831	down
EGP14518	16.5233	16.5371	17.6525	2.1197	2.0408	2.0007	-3.08103	0	EGP14518	down
EGP15893	15.8059	15.2624	14.8569	480.796	443.575	444.331	4.8555	0	EGP15893	up
EGP16102	82.9801	78.9638	80.043	6.0074	5.1858	6.6967	-3.80051	0	EGP16102	down
EGP23570	0.9247	1.1157	0.8445	44.2357	39.9557	49.0347	5.4869	0	EGP23570	up
EGP30923	0.5542	0.5881	0.644	819.989	854.604	937.733	10.4817	0	EGP30923	up
novel.211	48.3992	48.6318	52.3512	3.9538	3.7292	3.9085	-3.72866	0	--	down
EGP21679	3.7595	3.8602	3.3587	61.0325	68.3801	77.4875	4.1937	1.95984e-300	EGP21679	up
EGP03170	16.3133	14.9665	16.2054	1.2495	1.1656	1.1263	-3.78484	1.54827e-295	EGP03170	down
EGP07180	0.4211	0.4172	0.4978	9.2554	8.7699	8.691	4.2878	4.86396e-232	EGP07180	up
EGP32423	16.43	17.982	16.81	93.7498	84.6601	91.4076	2.35713	4.79606e-224	EGP32423	up
EGP24622	4.7962	4.4749	6.6442	89.0289	101.079	115.911	4.22679	1.45113e-207	EGP24622	up
EGP18904	0.0669	0.2314	0.1689	233.233	257.478	274.894	10.6825	1.57065e-204	EGP18904	up
novel.1823	0.1073	0.1199	0.1483	5.4432	4.7311	5.1981	5.3293	1.15559e-199	--	up
EGP28412	0.8059	0.9295	0.5481	186.011	195.216	215.234	7.97406	1.49088e-196	EGP28412	up
EGP15975	0.5207	0.3861	0.736	27.1711	28.2033	21.4459	5.51972	2.74429e-189	EGP15975	up
EGP04328	699.219	669.91	942.732	74.2581	67.211	72.4515	-3.47547	4.68682e-188	EGP04328	down
EGP26463	0.1832	0.2264	0.3306	25.8291	32.2495	33.845	6.94404	1.67595e-186	EGP26463	up
EGP21564	0.1011	0.0583	0.1064	152.297	154.417	170.458	10.7681	2.58389e-165	EGP21564	up
EGP32037	0.0191	0.1539	0.0482	365.863	418.241	425.344	12.4166	4.27767e-158	EGP32037	up
novel.1678	12.706	11.6062	12.6846	1.8327	1.5545	1.4253	-2.98175	1.37462e-156	--	down
novel.2251	0.0833	0.0493	0.1023	2.5989	2.5366	3.1694	5.10895	1.82955e-144	--	up
EGP10776	0.5248	0.4985	0.4549	9.1457	9.3882	9.8897	4.21901	6.2314e-144	EGP10776	up
EGP30567	24.2189	26.6779	25.3738	5.6681	6.3343	5.6615	-2.1493	1.36891e-142	EGP30567	down
EGP08843	93.1917	92.803	106.066	23.2035	23.4962	21.3202	-2.14207	1.92585e-140	EGP08843	down
EGP19015	7.1406	7.5557	6.6195	53.7681	49.5737	60.4626	2.89971	4.63744e-137	EGP19015	up
EGP12462	65.5301	67.85	58.381	222.502	235.856	244.001	1.83242	1.41982e-133	EGP12462	up
novel.2248	2.018	1.3092	1.7922	32.4976	28.3084	30.4615	4.10818	4.40468e-133	--	up
EGP09440	98.1069	103.858	98.7074	272.123	259.406	275.791	1.3846	1.24794e-131	EGP09440	up
EGP11243	13.9255	12.622	14.2863	0.31	0.2631	0.4222	-5.40989	2.33e-130	EGP11243	down
novel.1391	87.0557	77.2912	82.521	357.292	318.617	376.984	2.05118	2.00229e-129	--	up
EGP26291	0.0935	0.3018	0.425	873.634	966.248	1030.97	11.7572	2.67412e-126	EGP26291	up
EGP18471	1.9148	2.0141	1.2383	41.6871	35.0155	27.1273	4.28258	1.04817e-125	EGP18471	up
EGP11266	345.595	363.8	368.068	122.98	133.057	122.993	-1.54723	4.08808e-125	EGP11266	down
EGP12188	55.9658	51.2804	55.774	0.6233	0.17	0.3322	-7.22744	9.08879e-124	EGP12188	down
EGP25884	6.7954	7.6208	6.7991	23.8262	24.3923	25.9534	1.76565	2.61713e-123	EGP25884	up
EGP06199	19.2727	18.5362	25.568	141.841	167.093	159.956	2.84872	9.42417e-123	EGP06199	up
EGP11159	0.473	0.9601	0.3106	346.892	365.305	368.872	9.23522	6.32193e-122	EGP11159	up
EGP11141	20.5399	22.438	25.0765	91.5198	103.273	98.1265	2.0664	2.42037e-117	EGP11141	up
EGP27863	253.086	255.991	272.358	722.39	682.612	745.49	1.41985	7.67403e-115	EGP27863	up
EGP05490	12.0068	9.8374	10.2092	62.3736	67.0197	55.6472	2.48712	8.77799e-115	EGP05490	up
novel.206	35.2925	31.2522	31.283	1.5754	1.9052	1.4553	-4.34434	5.65927e-114	--	down
EGP10904	0.0319	0.1656	0.1007	32.277	34.6543	37.2141	8.45666	7.78152e-114	EGP10904	up
EGP30699	0	0.0811	0.1481	216.302	261.233	265.862	11.7362	2.57245e-113	EGP30699	up
EGP12755	6.6337	6.8188	5.6619	32.6584	30.1234	28.8436	2.219	1.89357e-111	EGP12755	up
EGP13468	44.0262	42.5336	40.3525	117.656	115.9	111.321	1.40169	1.26808e-110	EGP13468	up
EGP28555	7.7615	7.4376	7.6085	32.1007	36.6558	34.1915	2.13403	1.71166e-107	EGP28555	up
EGP24144	2.463	1.912	1.8546	34.3215	45.2278	41.1408	4.22505	2.51716e-107	EGP24144	up
EGP31337	1.2749	1.1176	0.9018	17.1313	18.7534	20.427	4.04181	8.88679e-107	EGP31337	up
EGP13264	13.1749	10.9366	11.4611	62.9444	60.7801	52.6899	2.26846	1.17677e-106	EGP13264	up
EGP28582	242.06	244.25	262.853	92.1808	83.4755	93.3054	-1.51874	1.60795e-105	EGP28582	down
EGP32101	33.1422	29.9402	30.1743	95.5985	89.5331	89.1873	1.51566	2.39506e-105	EGP32101	up
EGP13989	23.577	22.4303	25.1011	72.0817	68.1146	68.8057	1.51522	4.83186e-105	EGP13989	up
EGP10532	0.4346	0.188	0.4803	102.673	76.2546	116.226	8.02249	2.11143e-103	EGP10532	up
EGP25741	0.0368	0.106	0	174.153	191.988	202.81	11.8966	3.25185e-103	EGP25741	up
EGP13379	82.7245	72.5508	77.7576	258.097	240.462	229.456	1.60293	3.33491e-103	EGP13379	up
EGP21442	390.55	386.221	382.577	903.494	852.173	863.868	1.13559	6.93395e-103	EGP21442	up
EGP04540	18.9353	16.0794	15.7786	73.7647	63.4644	70.4668	1.98976	1.54267e-101	EGP04540	up
EGP07168	1.5912	1.6246	1.219	38.6284	24.2067	27.8401	4.30688	9.06892e-100	EGP07168	up
EGP08897	6.399	6.5495	5.845	21.6641	20.2753	20.9411	1.70092	4.78915e-99	EGP08897	up
EGP01097	47.7105	46.442	46.7684	9.6353	8.4415	8.5181	-2.44602	1.08315e-98	EGP01097	down
EGP18192	227.113	226.776	240.937	102.635	95.908	98.9309	-1.26445	2.01645e-98	EGP18192	down
novel.482	0.0534	0.1849	0.2925	16.3957	15.6335	15.6727	6.52304	2.86112e-98	--	up
EGP11410	41.3547	43.8198	43.8002	7.3728	10.1752	9.0257	-2.31825	3.00064e-97	EGP11410	down
EGP14793	86.5779	58.6966	66.3301	408.046	387.176	380.322	2.43263	5.37338e-93	EGP14793	up
EGP06071	12.2798	12.6039	13.4754	41.6095	37.4809	40.7465	1.60372	2.19548e-92	EGP06071	up
EGP01235	553.938	590.786	607.59	1543.28	1672.27	1509.44	1.39087	1.03108e-91	EGP01235	up
EGP10531	0.3942	0.3789	0.4979	88.5977	69.2874	98.2123	7.62464	6.5902e-91	EGP10531	up
EGP02033	8.2459	8.9314	9.0033	32.8043	29.5963	32.6778	1.82151	1.25042e-90	EGP02033	up
EGP27346	8.6223	8.3773	9.5745	0.4958	0.6592	0.6794	-3.89742	1.33239e-90	EGP27346	down
EGP31807	2.42	2.2712	2.4273	11.2803	9.3288	10.3186	2.0784	4.99712e-89	EGP31807	up
EGP14223	65.1707	66.8246	65.4396	18.9282	23.1682	19.8303	-1.71217	1.85332e-88	EGP14223	down
EGP28154	0.8388	1.093	0.8668	7.7911	8.6699	9.693	3.18594	2.38915e-88	EGP28154	up
EGP31526	25.3613	21.2201	29.0062	3.3852	1.9856	2.7356	-3.26378	2.44969e-88	EGP31526	down
EGP31512	2.4297	2.5295	2.9874	22.1099	17.8354	19.5627	2.86931	6.42649e-88	EGP31512	up
novel.2102	20.4185	23.8883	20.9282	1.5474	1.2311	1.9242	-3.84219	1.28144e-87	--	down
EGP01798	160.719	152.325	174.902	52.5957	47.0637	56.4687	-1.68523	2.60227e-86	EGP01798	down
EGP09730	0.0489	0.1014	0.0494	11.663	8.8379	9.2442	7.18672	3.46734e-85	EGP09730	up
EGP09905	79.0872	102.475	72.4573	443.136	408.241	382.1	2.24011	4.84109e-85	EGP09905	up
EGP28737	20.3474	15.197	15.3874	98.5206	88.0152	85.467	2.37274	6.91944e-85	EGP28737	up
EGP02881	5.5032	4.3087	3.9575	32.781	26.373	30.8242	2.66141	7.15014e-85	EGP02881	up
EGP33663	2.3949	1.6299	2.0479	17.2844	14.2039	18.2559	2.98812	4.98076e-83	EGP33663	up
EGP27883	1.4874	1.2021	0.9462	13.7613	14.621	21.9001	3.74107	7.76611e-83	EGP27883	up
EGP18419	14.795	15.187	16.8806	59.2989	51.9217	55.7172	1.79387	9.11689e-83	EGP18419	up
EGP26701	20.1942	22.1491	21.6494	57.8241	54.2822	57.3186	1.36497	2.68908e-82	EGP26701	up
EGP32325	63.2708	64.112	69.237	26.2021	26.1113	26.0037	-1.36809	2.79738e-82	EGP32325	down
novel.427	2.7006	2.6314	2.5876	26.6964	25.4877	24.9056	3.24153	3.41067e-82	--	up
EGP25953	0	0.0367	0.0402	64.0853	70.3312	65.314	11.4022	3.49729e-82	EGP25953	up
EGP21158	47.0292	41.0073	41.7648	116.58	121.71	127.555	1.45388	2.0341e-81	EGP21158	up
EGP13270	161.123	173.45	166.727	77.4373	76.1432	80.1343	-1.14131	2.67754e-81	EGP13270	down
EGP16756	0.238	0.183	0.2004	17.3923	19.2095	19.2321	6.43857	8.4583e-81	EGP16756	up
EGP26012	3.6677	2.9599	3.1553	16.5229	14.1223	15.8801	2.20556	7.67568e-80	EGP26012	up
EGP21874	0.0303	0.1397	0.0383	178.501	183.675	155.669	11.2627	1.10745e-79	EGP21874	up
EGP05443	26.4084	24.8087	24.4272	8.8964	8.967	9.9811	-1.4832	1.20861e-79	EGP05443	down
EGP11220	361.553	333.11	304.522	110.774	100.016	89.1076	-1.77614	1.06609e-78	EGP11220	down
EGP16692	5.3664	5.5959	5.1997	22.3071	19.3221	20.3958	1.89943	1.89728e-78	EGP16692	up
EGP01384	60.2532	58.7029	67.9985	8.4433	11.6254	12.1218	-2.57875	3.53256e-78	EGP01384	down
EGP27894	263.083	260.477	258.064	695.672	596.839	669.699	1.28728	7.21626e-78	EGP27894	up
EGP23488	7.2956	6.4827	5.7567	28.0986	34.4345	29.7486	2.19738	1.37525e-77	EGP23488	up
EGP14347	0.0263	0.1519	0.0333	86.4282	84.9031	96.2694	10.2886	1.63174e-77	EGP14347	up
EGP14221	27.5838	28.6262	28.9317	8.3859	9.3262	8.4311	-1.74223	2.35604e-77	EGP14221	down
EGP29957	1.5843	1.6243	1.423	21.7138	22.4255	17.2043	3.68535	4.75538e-77	EGP29957	up
EGP15810	22.0183	22.3879	15.735	126.324	112.781	99.4349	2.45119	1.31407e-76	EGP15810	up
EGP26007	1.0852	0.9835	0.6854	13.694	12.1195	14.7577	3.82381	1.68531e-76	EGP26007	up
EGP31283	2.0862	1.6924	1.6971	21.9108	15.8919	15.2897	3.23212	1.85716e-76	EGP31283	up
EGP20992	19.4214	21.374	15.431	79.5364	77.1743	73.4676	1.99244	2.69092e-76	EGP20992	up
EGP13655	0.9377	0.8562	0.7156	9.8728	9.1634	10.4744	3.50498	4.93414e-76	EGP13655	up
EGP10670	1.8783	0.9711	1.3089	13.8785	14.9359	16.8772	3.40586	6.05259e-76	EGP10670	up
novel.429	0.1958	0.5644	0.1236	18.4764	19.9773	19.4899	5.99524	6.09693e-76	--	up
EGP15685	59.6184	55.6404	58.5922	16.5453	19.8321	15.3824	-1.78723	2.04977e-75	EGP15685	down
EGP09197	12.5563	11.8002	11.1289	40.9834	34.2288	41.0889	1.67103	2.89651e-75	EGP09197	up
EGP01597	118.083	119.908	117.776	59.835	58.2167	56.1519	-1.07025	8.48986e-75	EGP01597	down
EGP28453	290.573	273.714	292.79	120.96	133.885	125.379	-1.21281	1.53141e-74	EGP28453	down
EGP31754	22.192	23.2748	21.1002	73.5463	61.3686	72.711	1.60018	2.03156e-74	EGP31754	up
EGP06838	3.5709	3.3766	3.2869	12.7049	14.7838	12.2591	1.91689	2.44899e-74	EGP06838	up
EGP19425	20.3434	19.3284	23.0192	3.6623	3.831	3.2587	-2.58112	4.76276e-74	EGP19425	down
EGP18770	39.8757	32.9471	36.7679	7.9292	7.2221	6.8001	-2.35995	4.96621e-74	EGP18770	down
EGP13219	21.8257	23.5093	19.0584	84.384	69.1306	75.7553	1.79126	6.45434e-74	EGP13219	up
EGP19329	22.538	17.4506	23.8116	116.842	90.9759	120.281	2.32096	7.66762e-74	EGP19329	up
EGP19886	27.1447	24.6994	25.7352	99.8666	80.5357	84.7423	1.73199	1.94926e-73	EGP19886	up
EGP16769	0.7131	0.4277	0.5765	7.559	10.6974	8.8948	3.93363	2.34875e-73	EGP16769	up
EGP06737	25.4118	27.6509	22.6532	6.7258	5.3369	5.3719	-2.15881	2.47944e-73	EGP06737	down
EGP10086	37.6655	37.6946	34.5816	98.6527	86.7261	93.8353	1.30387	1.02287e-72	EGP10086	up
EGP19307	0.5419	0.3906	0.4563	12.0717	9.4527	9.9325	4.45153	7.68063e-71	EGP19307	up
EGP05468	6.3105	4.5771	7.9706	65.4866	48.7939	75.4519	3.2908	1.55527e-70	EGP05468	up
EGP28298	1.4076	0.9426	1.3477	12.6973	12.8341	16.6549	3.46728	1.90343e-69	EGP28298	up
EGP30586	1.0852	0.9407	1.6199	9.9251	9.0488	8.483	2.8779	2.60272e-69	EGP30586	up
EGP04114	55.6256	56.4433	55.9947	24.4171	25.0824	23.3732	-1.24517	6.51404e-69	EGP04114	down
EGP30350	130.19	154.881	156.043	55.1663	56.0422	55.8635	-1.44094	3.46533e-68	EGP30350	down
EGP02421	1.7369	2.2895	3.0296	21.0445	23.4558	29.4946	3.36141	3.69016e-68	EGP02421	up
EGP21277	41.6433	41.5057	37.5583	14.6192	16.062	14.964	-1.44295	2.51532e-67	EGP21277	down
novel.646	1.8754	1.596	1.1958	9.1798	8.8763	10.2511	2.5517	2.52807e-67	--	up
EGP19038	3.7198	3.7695	4.9156	23.799	20.8441	26.7375	2.48807	8.22461e-67	EGP19038	up
novel.1060	16.9703	15.4868	17.8856	2.318	2.6233	1.3464	-3.03677	1.86675e-66	--	down
EGP06407	51.7417	46.7885	49.08	18.1762	20.3111	20.4795	-1.3644	3.78829e-66	EGP06407	down
EGP31473	451.427	435.849	465.89	119.059	157.488	151.037	-1.70229	7.75775e-66	EGP31473	down
EGP12758	8.3603	6.7536	6.736	25.5471	31.001	26.8778	1.89148	1.71864e-65	EGP12758	up
EGP10901	388.476	372.858	432.047	152.368	160.804	172.861	-1.33677	8.44502e-65	EGP10901	down
EGP25720	30.9301	29.5914	30.6082	66.587	74.0562	67.4483	1.15111	3.53995e-64	EGP25720	up
EGP05393	3.7881	3.9759	4.665	32.9569	22.4113	35.9804	2.83823	3.62382e-64	EGP05393	up
EGP28329	27.2564	27.1419	26.5716	8.7773	6.7254	7.0047	-1.88756	4.02037e-64	EGP28329	down
EGP06220	14.829	11.9772	17.0774	63.3881	78.3505	65.0206	2.19663	1.08078e-63	EGP06220	up
EGP05489	2.6037	2.3902	2.1813	14.2989	14.9007	14.2781	2.55384	1.24815e-63	EGP05489	up
EGP01040	5.6084	6.107	4.3559	34.6359	29.3633	40.749	2.65953	1.09331e-62	EGP01040	up
EGP01797	277.598	266.411	315.386	93.8515	78.0331	99.5033	-1.70452	1.35627e-62	EGP01797	down
EGP32304	17.7403	17.6017	13.3609	58.7203	57.357	63.4498	1.83928	6.48732e-62	EGP32304	up
EGP28236	1.9833	2.1529	1.8911	12.7899	10.9049	14.07	2.60533	1.36106e-61	EGP28236	up
EGP19850	35.3469	35.3287	36.9785	7.7743	5.5406	4.8435	-2.60605	2.16684e-61	EGP19850	down
EGP14712	0.3177	0.3518	0.289	4.5006	4.496	5.1148	3.83645	4.30631e-61	EGP14712	up
EGP14208	13.901	15.2143	15.1297	2.4275	2.5825	2.5135	-2.5949	5.03035e-61	EGP14208	down
EGP31292	6.2867	5.2563	5.2937	21.0165	20.361	22.452	1.87801	5.63738e-61	EGP31292	up
EGP05605	153.031	142.112	152.666	72.1557	63.1792	65.1443	-1.20007	8.46933e-61	EGP05605	down
EGP30921	21.0999	22.8068	17.5597	118.68	87.3127	88.7675	2.22048	8.6208e-61	EGP30921	up
EGP12598	11.7292	12.7382	10.4893	47.0803	50.6512	42.7457	1.96597	1.33201e-60	EGP12598	up
EGP14967	59.0819	53.1971	47.1639	142.329	148.295	151.515	1.4301	4.88206e-60	EGP14967	up
EGP21637	35.2292	32.9893	36.3757	79.8836	76.3872	78.2973	1.12485	3.06743e-59	EGP21637	up
EGP29778	31.8013	33.4566	30.2872	11.6831	12.0141	11.8418	-1.46698	7.0634e-59	EGP29778	down
EGP10829	85.7143	84.5762	96.7723	24.1841	31.1336	30.0387	-1.68591	7.2431e-59	EGP10829	down
EGP01191	19.2407	16.6972	18.3033	56.2578	52.5452	47.4509	1.48581	7.77854e-59	EGP01191	up
EGP16100	15.7809	15.9058	14.0415	38.9042	35.4551	39.068	1.26932	2.59593e-58	EGP16100	up
EGP04779	146.611	139.13	159.121	24.5137	40.154	30.834	-2.25937	3.24718e-58	EGP04779	down
novel.222	2.6468	2.6511	2.8524	6.835	6.3546	6.6425	1.24326	9.2366e-58	--	up
EGP28179	2.0033	2.092	2.0516	12.8871	16.3038	13.6346	2.76241	2.24712e-57	EGP28179	up
EGP14609	1.9817	2.4489	2.2051	12.5586	10.0709	12.1476	2.35175	2.32166e-57	EGP14609	up
EGP15823	5.3108	5.2469	5.535	1.0521	1.0862	1.1084	-2.34956	2.53455e-57	EGP15823	down
EGP19139	99.7076	102.32	95.0539	39.64	45.9974	45.0775	-1.22452	2.73566e-57	EGP19139	down
EGP28812	22.7354	25.4646	23.6282	60.4307	71.32	72.2989	1.46651	2.87709e-57	EGP28812	up
EGP07290	2.1905	1.6492	2.6899	18.5141	15.0875	18.7453	2.96625	2.92445e-57	EGP07290	up
EGP34418	0.2175	0.135	0.2218	3.9912	3.1832	5.5293	4.42315	5.18313e-57	EGP34418	up
EGP32427	357.097	346.155	374.928	789.919	714.265	745.626	1.02055	5.65756e-57	EGP32427	up
EGP20918	227.67	216.087	226.791	539.607	461.174	509.861	1.13102	1.04928e-56	EGP20918	up
EGP30521	136.473	136.639	147.415	71.5841	68.197	64.724	-1.08036	8.48416e-56	EGP30521	down
EGP30604	23.1626	16.918	15.7163	88.3008	87.0828	71.8353	2.10664	1.15698e-55	EGP30604	up
EGP28230	2.6783	2.9686	3.023	10.7241	9.2285	10.2199	1.76083	1.782e-55	EGP28230	up
EGP05787	7.3556	8.4052	6.8533	0.2928	0.2541	0.3121	-4.76295	2.58828e-55	EGP05787	down
EGP07130	230.023	224.038	167.54	748.678	648.051	720.314	1.72768	3.22806e-55	EGP07130	up
EGP09801	5.7229	6.3649	5.2239	18.4672	21.265	23.6056	1.83028	3.82166e-55	EGP09801	up
EGP26892	112.959	108.647	110.485	53.902	51.3626	53.2508	-1.10768	3.86441e-55	EGP26892	down
novel.37	4.6972	4.2297	4.5104	0.2483	0.5387	0.2286	-3.75204	5.08756e-55	--	down
EGP19914	8.4735	7.6207	8.4092	22.2755	23.2996	23.9533	1.46379	1.4371e-54	EGP19914	up
EGP19218	14.6306	16.491	14.6995	48.0148	56.75	46.1275	1.68046	1.50136e-54	EGP19218	up
EGP24968	1.1743	0.9481	1.3349	13.4932	16.5629	13.3549	3.61509	2.34881e-54	EGP24968	up
EGP07189	0.0463	0.0445	0.0098	4.2917	4.0628	3.7831	6.82226	2.84639e-54	EGP07189	up
novel.1548	13.4236	12.6956	13.0683	3.051	3.4215	3.4843	-2.01755	2.85638e-54	--	down
EGP02780	46.0659	43.2572	45.492	19.5976	20.3304	18.4433	-1.24732	3.22805e-54	EGP02780	down
EGP18914	19.3333	20.5539	17.09	69.5534	59.3545	80.3225	1.83492	3.73715e-54	EGP18914	up
EGP30942	4.476	4.7219	5.2205	0.735	0.8113	0.5141	-2.83963	3.85635e-54	EGP30942	down
novel.9	13.284	15.2603	10.2944	92.1507	61.6739	87.6391	2.59337	7.6333e-54	--	up
EGP02630	14.5083	13.8484	15.8816	2.5028	2.4642	2.0008	-2.70285	9.45737e-54	EGP02630	down
novel.1029	32.3666	31.2996	35.9113	14.8928	13.4844	13.976	-1.27387	1.84258e-53	--	down
EGP25447	33.1154	28.9493	31.1183	12.0432	12.2619	13.5883	-1.3395	2.13804e-53	EGP25447	down
EGP22035	27.237	27.2777	24.6691	102.844	77.7951	85.6101	1.70824	3.16728e-53	EGP22035	up
EGP28117	7.3738	6.6418	7.5396	20.5649	20.9899	21.2616	1.50286	3.4269e-53	EGP28117	up
EGP26720	25.2633	27.1992	20.6842	68.3169	71.8003	75.6258	1.5197	6.56512e-53	EGP26720	up
EGP19255	49.3592	49.4105	48.0003	11.6663	16.8401	15.4872	-1.77798	8.51552e-53	EGP19255	down
EGP16137	284.626	253.089	273.245	736.841	624.452	629.957	1.25535	1.32203e-52	EGP16137	up
EGP05394	4.3266	4.6746	3.9999	19.4823	16.0327	15.0328	1.91834	1.55904e-52	EGP05394	up
EGP28160	85.1459	77.4107	88.1546	196.711	178.205	184.638	1.11756	1.62985e-52	EGP28160	up
EGP13276	88.281	83.2592	76.8797	178.626	174.18	192.348	1.09321	2.55141e-52	EGP13276	up
EGP31929	1.6441	1.9387	2.1231	7.9411	8.6254	8.3263	2.09149	3.59547e-52	EGP31929	up
EGP31472	3.149	2.4306	2.9983	13.8316	13.4223	14.2888	2.23287	3.82107e-52	EGP31472	up
novel.287	6.1957	5.7871	6.1974	0.0488	0.0621	0.1039	-6.45959	3.83313e-52	--	down
novel.2371	8.709	8.7103	8.7029	4.3394	3.6963	3.9214	-1.16804	5.79445e-52	--	down
EGP26179	182.222	155.295	171.641	81.0638	74.2947	73.9996	-1.1911	5.90929e-52	EGP26179	down
EGP28580	13.0098	13.1358	12.3934	31.7925	31.6525	32.8196	1.27958	1.0711e-51	EGP28580	up
EGP00919	8.0246	6.9312	8.2887	23.4389	22.1182	23.267	1.52554	9.43735e-51	EGP00919	up
EGP27794	79.6962	80.4871	82.1926	203.033	167.394	197.487	1.18762	1.08362e-50	EGP27794	up
EGP31225	15.503	12.612	13.8836	79.0033	64.0486	51.9166	2.17378	1.14362e-50	EGP31225	up
EGP06264	32.8115	28.8841	31.0756	14.3295	14.0771	13.9326	-1.17231	1.24745e-50	EGP06264	down
EGP09355	1.6527	1.3615	0.9798	14.8301	11.478	14.0368	3.27909	2.62434e-50	EGP09355	up
EGP31632	13.2639	14.6188	11.3642	37.3419	37.3499	36.1432	1.45671	3.36663e-50	EGP31632	up
novel.2004	4.4009	4.4668	3.3352	51.6013	40.1018	27.3905	3.24373	4.00007e-50	--	up
EGP05286	186.557	214.494	210.648	421.931	443.559	457.576	1.07262	5.10864e-50	EGP05286	up
EGP19749	27.3579	26.2713	28.051	13.061	13.8421	13.3086	-1.06238	5.48108e-50	EGP19749	down
EGP20971	42.3015	41.691	37.8426	17.1919	13.6898	15.3831	-1.43805	6.60477e-50	EGP20971	down
EGP28511	57.5187	58.4902	62.1968	25.7653	28.2727	24.0746	-1.22934	7.01047e-50	EGP28511	down
EGP19183	5.7684	4.7434	5.3294	21.209	17.339	19.0462	1.81968	9.98506e-50	EGP19183	up
EGP28482	12.861	10.6675	11.4402	31.3146	35.5025	38.2339	1.54525	1.14216e-49	EGP28482	up
EGP14051	24.3664	23.9469	27.9229	4.1625	5.1783	3.6973	-2.58232	5.3177e-49	EGP14051	down
EGP13641	53.2607	45.8416	53.9974	17.4963	15.2263	19.7128	-1.58784	7.52148e-49	EGP13641	down
EGP13822	5.598	4.8617	4.0001	20.6064	18.6249	22.6887	2.05172	7.97544e-49	EGP13822	up
EGP07279	16.4098	16.0285	15.4928	33.7521	31.9526	33.7996	1.0127	8.86902e-49	EGP07279	up
EGP16715	18.5262	19.056	19.5553	5.1258	6.969	5.5574	-1.7329	1.10951e-48	EGP16715	down
novel.1068	50.3464	51.1952	46.2676	23.0307	19.4491	22.6762	-1.22275	1.35329e-48	--	down
EGP28322	31.463	26.5497	36.2353	9.3783	9.6823	9.247	-1.77552	1.47762e-48	EGP28322	down
EGP28036	14.6939	14.8893	16.4492	45.3201	41.6107	46.2656	1.49388	1.54485e-48	EGP28036	up
EGP19849	26.005	24.8487	27.0994	5.5439	3.0459	3.9022	-2.684	1.70383e-48	EGP19849	down
EGP23571	3.4476	3.5146	2.2756	17.5776	15.3128	15.3166	2.33676	2.24295e-48	EGP23571	up
novel.45	0.7035	0.9068	0.8493	5.2766	4.4123	5.844	2.62271	4.78418e-48	--	up
EGP22464	10.9956	10.0595	7.3299	57.6182	41.2192	46.3152	2.31008	4.82739e-48	EGP22464	up
EGP04821	2.0029	2.2915	1.877	9.0529	8.8961	8.5996	2.06433	5.5767e-48	EGP04821	up
EGP28975	26.9252	27.7216	30.1397	12.4444	13.4187	12.4249	-1.18642	2.62246e-47	EGP28975	down
novel.2208	10.6559	8.8029	9.4256	2.2705	1.3437	1.953	-2.41917	3.24881e-47	--	down
EGP06803	43.2753	47.8743	35.0901	142.296	119.66	126.838	1.58245	3.39472e-47	EGP06803	up
EGP29186	64.545	61.265	63.13	23.6437	29.0751	24.1244	-1.33735	3.5128e-47	EGP29186	down
EGP06299	14.1999	12.3702	15.2464	38.8568	36.4906	40.6137	1.43108	4.18143e-47	EGP06299	up
EGP11373	1.9642	2.1794	1.7586	13.8182	10.9104	16.3134	2.75409	4.69041e-47	EGP11373	up
EGP00944	43.6844	40.9234	40.4275	20.1664	17.945	20.7982	-1.12707	6.22597e-47	EGP00944	down
EGP28191	6.0259	5.3047	6.9387	20.7719	23.4069	20.8897	1.79465	1.33486e-46	EGP28191	up
EGP13194	82.0272	84.0889	73.2398	33.5674	33.2106	38.8477	-1.22098	1.55108e-46	EGP13194	down
EGP03122	20.9062	20.8681	20.3921	10.3358	10.6795	9.8921	-1.04793	1.63677e-46	EGP03122	down
EGP04330	15.4903	15.0543	15.5681	37.4438	34.3247	33.4766	1.15034	1.87795e-46	EGP04330	up
EGP31122	7.4964	7.5716	7.5617	16.6185	16.0786	16.3873	1.07689	1.95068e-46	EGP31122	up
EGP02794	3.9774	4.9977	4.8604	19.4885	20.5247	18.4689	2.04537	2.02965e-46	EGP02794	up
EGP19306	0.3882	0.2985	0.2615	7.6164	7.4744	6.307	4.43848	2.10991e-46	EGP19306	up
EGP00285	10.9729	8.3094	7.6998	55.2325	55.9579	48.2054	2.51295	2.32623e-46	EGP00285	up
novel.805	9.4559	7.854	7.4159	32.1286	23.6926	27.8555	1.71726	2.5372e-46	--	up
EGP11761	6.1957	5.6039	6.5694	0.7838	0.9308	1.1003	-2.74934	3.54361e-46	EGP11761	down
EGP05739	38.3407	41.3624	38.5948	115.748	107.256	93.317	1.37936	3.76442e-46	EGP05739	up
EGP21162	218.962	202.335	217.258	458.604	406.417	452.034	1.00363	4.50582e-46	EGP21162	up
EGP13100	46.7342	47.6431	45.7575	101.802	89.4604	102.731	1.02822	5.49694e-46	EGP13100	up
EGP30009	32.2691	31.5231	30.8558	10.5128	9.552	8.2823	-1.77817	6.29119e-46	EGP30009	down
EGP25825	45.8394	44.0963	56.5894	13.8311	16.9072	14.1637	-1.74566	6.97287e-46	EGP25825	down
novel.1952	1.4313	1.5209	1.6656	5.3833	5.3556	5.3461	1.76396	8.64601e-46	--	up
EGP33401	41.3692	46.7751	42.0276	21.7121	21.5249	20.8498	-1.06212	1.22522e-45	EGP33401	down
EGP23520	6.9324	6.5232	6.8835	19.5886	17.8873	17.122	1.3843	1.37118e-45	EGP23520	up
EGP00995	23.8458	22.5328	20.8502	48.4773	49.9043	46.9738	1.07146	1.7734e-45	EGP00995	up
EGP18098	252.794	242.906	253.52	94.0733	117.84	113.164	-1.24479	2.00961e-45	EGP18098	down
EGP13690	21.0376	21.8064	20.0961	9.9031	9.021	9.3128	-1.19702	2.97957e-45	EGP13690	down
EGP04614	1.0566	1.679	1.038	9.3328	12.4061	14.5548	3.22699	3.31393e-45	EGP04614	up
EGP31207	13.4028	10.6793	12.8904	42.5266	35.6477	43.6661	1.67838	3.69764e-45	EGP31207	up
novel.1491	0.2718	0.2743	0.2789	2.5095	2.6716	3.5452	3.3622	3.99137e-45	--	up
EGP10096	61.4544	65.0758	74.6954	152.623	159.673	151.973	1.16584	4.10864e-45	EGP10096	up
EGP04675	6.3874	6.2548	5.4194	15.7669	14.6173	15.092	1.28995	5.7922e-45	EGP04675	up
EGP10220	21.6079	20.9799	22.0058	7.3018	5.7715	8.0544	-1.65499	5.85024e-45	EGP10220	down
EGP18499	96.886	90.9127	87.5447	197.187	182.935	190.81	1.0108	6.86398e-45	EGP18499	up
EGP10435	10.0266	9.2008	8.7501	25.5639	21.5865	24.4496	1.31369	8.21241e-45	EGP10435	up
EGP12310	3.1657	2.6676	2.861	8.7755	8.2178	7.87	1.47385	9.72599e-45	EGP12310	up
EGP29270	0.3129	0.5888	0.4576	4.8271	5.77	4.857	3.48262	1.42585e-44	EGP29270	up
EGP01098	20.4384	20.0957	21.5642	4.5216	5.1017	6.1339	-2.02114	1.44891e-44	EGP01098	down
EGP15730	6.5011	5.8565	6.2678	1.6012	1.8194	1.3221	-2.0104	2.02082e-44	EGP15730	down
EGP19061	13.1213	14.0083	12.1298	41.6688	39.466	34.177	1.51421	2.30367e-44	EGP19061	up
EGP30406	19.4908	21.7699	21.6568	54.8422	49.0189	49.1322	1.24288	2.85952e-44	EGP30406	up
EGP28530	20.7187	21.3267	19.5178	47.9015	58.0962	48.7495	1.29002	3.76328e-44	EGP28530	up
EGP02828	2.5866	2.9367	2.9863	11.3495	10.6999	11.0618	1.92379	4.10966e-44	EGP02828	up
EGP00333	52.4892	47.3856	49.7444	121.253	101.652	113.335	1.12726	5.37925e-44	EGP00333	up
EGP28767	9.0701	8.7421	6.2488	29.4132	30.5311	30.7961	1.86984	1.12155e-43	EGP28767	up
EGP12623	105.389	88.8755	109.911	42.7322	43.5855	42.959	-1.27506	1.23031e-43	EGP12623	down
novel.433	8.0134	8.0437	8.3005	2.4767	2.0343	2.9584	-1.74852	2.27364e-43	--	down
EGP18355	9.2446	10.2099	8.1649	24.7386	24.6114	27.3917	1.43269	2.81005e-43	EGP18355	up
EGP05962	7.8079	8.2971	8.5493	18.1595	16.8765	18.6137	1.08193	4.06279e-43	EGP05962	up
EGP11000	4.0014	3.2881	3.0679	0.1199	0.0572	0.1278	-5.14334	1.24304e-42	EGP11000	down
EGP02760	100.539	107.373	121.514	44.9898	47.1387	49.3078	-1.26011	1.24519e-42	EGP02760	down
novel.1800	2.8921	2.8539	2.8737	0.52	0.4317	0.2329	-2.89631	1.37562e-42	--	down
EGP24299	2.9996	3.2822	2.6068	9.3639	9.8583	10.0289	1.67614	1.38033e-42	EGP24299	up
EGP10289	2.4541	2.2815	2.4851	7.4789	8.9284	9.4127	1.79779	2.03455e-42	EGP10289	up
EGP00884	148.107	120.452	155.504	53.6831	57.9164	56.4657	-1.37594	2.6888e-42	EGP00884	down
EGP29841	1.3833	1.7451	1.7472	8.566	11.5898	9.6706	2.58012	2.95676e-42	EGP29841	up
EGP04464	39.1457	29.8617	29.5972	103.732	93.4302	90.8829	1.50535	3.18373e-42	EGP04464	up
EGP02699	16.6835	14.8292	14.2369	53.1073	41.5965	48.1196	1.59952	4.33147e-42	EGP02699	up
EGP22231	20.5163	23.9988	19.3181	9.0946	8.9644	9.4953	-1.25228	5.45065e-42	EGP22231	down
EGP21416	0.9478	0.8468	1.1971	6.0104	5.3497	5.2552	2.43933	5.85503e-42	EGP21416	up
EGP17263	12.6713	12.542	13.7736	28.9364	26.5176	28.6224	1.06872	6.04623e-42	EGP17263	up
EGP01052	181.981	164.624	187.166	420.957	358.202	392.486	1.09337	6.21211e-42	EGP01052	up
EGP09617	108.438	88.4305	115.438	41.064	36.5761	42.3651	-1.42122	7.33783e-42	EGP09617	down
EGP32052	59.5033	56.041	60.0909	157.705	124.754	155.185	1.2761	7.85272e-42	EGP32052	up
novel.1051	5.3005	5.6747	4.3565	17.4255	20.1853	18.4785	1.82865	7.92877e-42	--	up
EGP12845	33.0249	30.8391	25.6307	82.7007	109.541	93.4867	1.63435	1.04724e-41	EGP12845	up
EGP08919	12.3095	12.2949	11.2825	4.5373	4.8487	5.6531	-1.29613	1.26274e-41	EGP08919	down
novel.603	5.8222	5.6945	5.7948	1.7203	1.499	1.5863	-1.88987	1.42232e-41	--	down
EGP28509	4.4145	5.7939	5.2154	0.1562	0.1065	0.1189	-5.37718	1.71792e-41	EGP28509	down
EGP32972	18.8125	24.0595	15.8662	5.0687	4.8526	3.6816	-2.14848	1.79847e-41	EGP32972	down
EGP21554	23.5211	23.5468	21.2498	7.7259	8.6458	8.4037	-1.50395	1.83991e-41	EGP21554	down
novel.703	13.7339	14.8604	10.4617	1.9091	1.0302	1.1944	-3.28189	2.05363e-41	--	down
EGP31095	0.0661	0.1144	0.167	15.8499	15.4283	11.1113	6.93854	2.75424e-41	EGP31095	up
EGP12804	1.2993	1.3056	1.1049	8.2505	5.5873	7.8134	2.50047	3.58038e-41	EGP12804	up
EGP09649	9.4667	10.5337	11.6199	24.4129	25.9649	26.1523	1.23639	6.99603e-41	EGP09649	up
EGP11471	48.7807	43.4811	52.9682	11.7195	10.4592	9.6402	-2.22909	7.88635e-41	EGP11471	down
novel.2273	2.016	1.9149	2.5464	8.7485	7.2904	8.2998	1.87247	8.49558e-41	--	up
EGP04665	7.3634	7.7358	7.4106	19.6836	17.764	17.4537	1.24643	9.06287e-41	EGP04665	up
EGP24317	63.1588	45.5165	65.5074	16.6761	17.0958	18.1199	-1.78832	1.38018e-40	EGP24317	down
EGP30564	12.1234	10.7997	11.4824	5.3491	4.9432	4.6044	-1.24783	1.63204e-40	EGP30564	down
EGP08885	12.7702	9.1646	9.2682	63.4582	42.0239	49.1967	2.26498	1.63454e-40	EGP08885	up
EGP05874	120.757	127.161	118.339	41.8902	56.7208	45.9035	-1.38105	5.09039e-40	EGP05874	down
EGP10709	12.9716	15.6066	18.5299	3.6793	4.0945	3.3472	-2.11992	5.37677e-40	EGP10709	down
EGP25428	7.9044	6.6157	7.3156	18.5361	22.129	22.1352	1.48261	5.7335e-40	EGP25428	up
EGP31475	417.943	371.104	404.788	166.368	172.487	129.498	-1.38983	5.80133e-40	EGP31475	down
EGP26023	0.1767	0.2853	0.2678	4.0815	4.134	3.8425	4.0254	6.41649e-40	EGP26023	up
EGP28400	33.4834	35.7534	28.67	77.659	77.7459	87.6094	1.27035	1.15617e-39	EGP28400	up
EGP33329	9.6167	11.0348	9.5615	35.1572	27.686	29.8926	1.57774	1.17894e-39	EGP33329	up
EGP22028	18.485	20.9914	19.1565	66.0722	48.7007	66.4817	1.58741	1.25042e-39	EGP22028	up
EGP18844	0.7221	0.5879	0.7511	9.0145	9.7475	11.0417	3.81336	1.47317e-39	EGP18844	up
EGP06745	0.2488	0.4304	0.1833	4.9827	4.5019	5.3369	4.05818	1.56729e-39	EGP06745	up
EGP22426	465.477	521.736	415.204	154.603	203.878	166.092	-1.45787	2.36621e-39	EGP22426	down
EGP29902	5.1648	5.7312	4.8267	13.9313	13.9284	15.9086	1.43566	2.45666e-39	EGP29902	up
EGP33562	1.1707	0.7781	1.1028	9.0038	8.6628	16.0943	3.42277	2.76507e-39	EGP33562	up
EGP23891	6.9505	6.7863	5.782	16.4395	17.8819	16.2796	1.33247	2.89857e-39	EGP23891	up
EGP17025	25.6965	24.7205	21.318	9.1986	7.4529	8.9532	-1.52854	3.40423e-39	EGP17025	down
EGP09193	0.5584	0.812	0.6439	3.8854	5.4623	5.2336	2.82092	3.81499e-39	EGP09193	up
EGP11154	1.9921	2.0707	1.9725	10.5542	7.1443	9.2363	2.11665	4.06983e-39	EGP11154	up
EGP27962	65.6653	58.2519	66.9472	171.927	135.007	160.345	1.25065	4.30339e-39	EGP27962	up
EGP13499	4.2096	5.0623	4.6367	14.1291	13.9361	15.085	1.59526	4.57228e-39	EGP13499	up
EGP06277	9.6773	11.4818	10.9958	28.274	25.995	26.6672	1.29347	6.44738e-39	EGP06277	up
EGP07113	22.3392	19.8457	20.8887	7.1477	6.648	8.6017	-1.53683	8.71583e-39	EGP07113	down
EGP00667	62.9349	58.6253	64.3678	22.1995	24.4438	28.444	-1.34956	9.73285e-39	EGP00667	down
EGP33696	112.52	99.4831	121.888	45.4005	42.9214	52.352	-1.2884	1.02805e-38	EGP33696	down
novel.1644	30.7232	31.0248	31.8268	13.8945	16.6998	15.0098	-1.07667	1.05771e-38	--	down
novel.1584	59.3346	79.4757	70.2501	1.5155	3.3007	1.4134	-5.10277	1.33188e-38	--	down
EGP03215	16.9145	17.0883	15.105	39.9615	43.8128	37.8546	1.26787	1.77381e-38	EGP03215	up
EGP18997	0.7817	1.102	0.8777	9.4033	7.4219	7.5986	3.11008	2.06739e-38	EGP18997	up
EGP10536	10.4384	11.8273	9.4175	24.4545	27.5205	28.2229	1.2994	2.16282e-38	EGP10536	up
EGP10406	3.482	3.4084	4.2823	13.4837	13.1297	15.3741	1.87292	2.47683e-38	EGP10406	up
EGP26824	0.0947	0.2731	0.0598	6.2201	5.2757	7.3106	5.41699	2.48368e-38	EGP26824	up
EGP02497	37.9439	37.3926	37.4192	16.9683	19.5781	16.2005	-1.13527	2.48749e-38	EGP02497	down
novel.395	6.1188	6.0154	5.5377	15.408	15.0341	13.6835	1.27908	2.75144e-38	--	up
EGP04463	4.0982	3.9171	3.4269	16.8184	12.4463	14.5356	1.89284	2.77861e-38	EGP04463	up
EGP26178	158.071	140.264	147.729	79.33	73.644	74.2556	-1.01386	3.32626e-38	EGP26178	down
EGP30794	3.6498	4.7817	2.9539	28.6679	28.441	18.4669	2.69043	3.5278e-38	EGP30794	up
EGP26487	44.5493	48.2334	42.1582	17.0395	21.5837	19.1369	-1.26365	3.6568e-38	EGP26487	down
EGP28574	28.0358	24.1742	21.8739	65.8904	58.3907	69.3782	1.34417	4.90624e-38	EGP28574	up
EGP31955	9.0582	11.2119	10.0459	38.5978	38.9937	35.8946	1.86798	5.49648e-38	EGP31955	up
EGP25931	5.5324	6.3809	5.1973	0.6464	0.5951	0.9842	-2.99164	9.42884e-38	EGP25931	down
EGP32996	25.9689	28.4929	29.6991	63.2711	56.4583	65.5797	1.09855	9.61106e-38	EGP32996	up
EGP14516	17.7255	19.9842	17.1754	39.907	39.9974	43.4831	1.12821	1.19026e-37	EGP14516	up
EGP31692	37.3527	35.2817	40.5198	13.6086	16.6838	16.1816	-1.32388	1.24856e-37	EGP31692	down
EGP24161	3.6378	3.6454	2.7117	20.6274	23.165	32.5698	2.88594	1.47481e-37	EGP24161	up
EGP13932	9.2781	7.794	6.5044	26.6745	24.0804	24.7388	1.63431	1.4994e-37	EGP13932	up
EGP09644	443.422	459.434	398.344	191.178	225.293	183.535	-1.15626	2.13644e-37	EGP09644	down
novel.2409	4.9963	5.5377	5.1819	0	0.0364	0.0102	-8.39954	2.33587e-37	--	down
EGP10516	74.1016	74.4323	71.7666	29.3504	36.3513	30.3842	-1.2362	2.45455e-37	EGP10516	down
EGP29702	20.3851	18.1111	22.9704	57.0095	47.5072	54.8328	1.33353	2.52167e-37	EGP29702	up
novel.832	0.0323	0.0745	0.0544	2.4747	2.8448	2.7589	5.63384	3.04485e-37	--	up
EGP06052	69.6152	80.4996	83.6118	203.957	246.474	220.766	1.48465	3.79286e-37	EGP06052	up
EGP19474	31.6882	37.4649	40.1863	9.7396	11.8816	13.233	-1.68992	4.30168e-37	EGP19474	down
EGP28121	95.6819	92.6014	90.286	28.6844	39.3332	26.8691	-1.59252	7.4399e-37	EGP28121	down
EGP25899	0.129	0.2338	0.0233	3.89	4.3535	5.4593	5.0806	7.79697e-37	EGP25899	up
EGP30562	1.523	1.1631	1.0788	16.3851	26.0797	14.6996	3.88345	1.46585e-36	EGP30562	up
EGP08658	40.8904	38.8727	43.4307	95.09	86.9242	109.743	1.20285	1.5009e-36	EGP08658	up
EGP03214	9.3634	9.5499	8.1906	21.8303	23.4234	20.8702	1.24568	1.67646e-36	EGP03214	up
EGP12552	45.1507	37.0663	46.9114	108.031	95.2543	105.639	1.21739	2.06827e-36	EGP12552	up
EGP06294	85.4894	84.5744	88.2194	40.2506	40.0991	47.2894	-1.05808	2.45589e-36	EGP06294	down
EGP28168	544.253	515.503	558.638	156.42	227.549	212.219	-1.48085	3.28053e-36	EGP28168	down
EGP09165	5.2582	4.3883	4.4404	11.938	10.9375	11.6594	1.25079	4.52966e-36	EGP09165	up
EGP05343	6.3691	6.3976	6.0555	16.0307	14.1504	15.7108	1.24428	5.64154e-36	EGP05343	up
EGP14310	0.5627	0.3786	0.3554	8.7422	9.5538	11.0178	4.43465	8.52275e-36	EGP14310	up
EGP11234	10.8427	10.2729	10.2965	21.7926	20.0604	22.8733	1.0016	1.04464e-35	EGP11234	up
EGP13494	10.901	11.3592	11.7238	41.3503	30.7187	32.6091	1.58324	1.41235e-35	EGP13494	up
EGP08941	3.6488	2.4244	2.0038	15.4391	20.645	17.5468	2.67798	1.91428e-35	EGP08941	up
EGP19847	10.4158	11.2845	11.0962	2.8918	1.506	2.0634	-2.38608	2.27597e-35	EGP19847	down
EGP28524	111.604	104.303	107.564	27.476	43.6581	33.2031	-1.67162	2.82372e-35	EGP28524	down
EGP18478	31.7093	37.1387	41.6008	13.9963	15.1483	14.787	-1.36969	2.97276e-35	EGP18478	down
EGP06308	10.943	11.2248	11.2538	4.2244	3.6649	4.5587	-1.46717	3.18453e-35	EGP06308	down
EGP12780	22.8898	23.6787	23.3973	1.3834	0.6604	0.7373	-4.6932	3.91313e-35	EGP12780	down
EGP26723	10.6576	10.0208	10.413	22.6606	24.0337	22.9954	1.12398	6.61456e-35	EGP26723	up
EGP16225	2.2084	2.3821	2.0468	8.4014	7.3452	7.6841	1.77808	8.73628e-35	EGP16225	up
EGP25999	12.1084	10.9974	11.3996	27.9426	31.7987	25.3246	1.26176	8.77899e-35	EGP25999	up
EGP09526	5.8203	6.6314	5.4168	17.7379	17.1458	20.7029	1.59559	9.64842e-35	EGP09526	up
EGP14572	40.9298	45.7204	42.451	8.9072	14.4824	12.0833	-1.90212	1.01972e-34	EGP14572	down
EGP23948	18.0427	18.231	18.4141	9.3047	8.7387	8.044	-1.10722	1.16177e-34	EGP23948	down
EGP01662	52.9593	57.8781	74.6329	205.344	174.332	168.465	1.52282	1.16948e-34	EGP01662	up
EGP07157	62.3074	56.7478	48.6014	129.401	124.135	130.978	1.15569	1.21697e-34	EGP07157	up
EGP09622	22.3969	23.0335	20.9514	64.4482	48.9161	64.0583	1.37694	1.38056e-34	EGP09622	up
EGP14659	18.1898	18.5086	19.3063	42.4503	37.4845	47.7058	1.1476	1.38752e-34	EGP14659	up
EGP04891	21.0164	29.284	27.8798	5.8335	5.0437	8.2355	-2.07473	1.98146e-34	EGP04891	down
EGP11409	469.851	399.546	487.458	141.625	194.886	181.238	-1.43034	1.99427e-34	EGP11409	down
EGP06393	18.04	16.8302	17.068	47.543	35.7273	42.9107	1.2395	2.0839e-34	EGP06393	up
EGP09623	5.9498	6.0186	6.4678	26.3609	20.6908	26.8177	1.96256	2.80243e-34	EGP09623	up
EGP28218	78.9981	85.7712	72.4303	158.177	170.816	187.107	1.08108	3.47343e-34	EGP28218	up
EGP06053	0.4294	0.5778	0.6327	27.6897	13.6186	16.8141	5.12276	3.54489e-34	EGP06053	up
EGP16108	9.1273	8.4953	8.2861	2.9706	2.2163	2.3275	-1.82703	5.98496e-34	EGP16108	down
EGP30791	113.525	101.493	125.388	54.2849	57.9391	56.2631	-1.05523	6.2943e-34	EGP30791	down
EGP31699	1.155	1.5986	1.4589	8.8933	6.465	7.4823	2.40416	6.99272e-34	EGP31699	up
EGP31706	13.8605	12.27	15.9723	3.9762	5.2508	3.9741	-1.71181	7.62155e-34	EGP31706	down
EGP05769	6.6524	6.0894	9.7361	0.7738	0.7979	0.8578	-3.25	1.05922e-33	EGP05769	down
EGP15957	115.891	109.296	137.726	36.3127	50.3722	45.4092	-1.49839	1.10178e-33	EGP15957	down
EGP32421	322.291	319.852	342.001	708.361	813.748	641.927	1.09687	1.14063e-33	EGP32421	up
EGP24506	25.9454	23.7569	25.677	56.8884	47.7099	54.9439	1.04064	1.22465e-33	EGP24506	up
EGP07178	0.1959	0.1977	0.1856	2.6421	2.1249	2.5866	3.6229	1.30811e-33	EGP07178	up
EGP07185	0.1537	0.2182	0.224	2.0935	3.0709	2.793	3.71413	1.36503e-33	EGP07185	up
EGP04515	57.2856	51.5881	50.1707	12.74	20.8475	15.3918	-1.73817	1.40438e-33	EGP04515	down
EGP32218	14.0784	14.2229	13.5531	29.7956	31.7755	28.666	1.06833	1.67373e-33	EGP32218	up
EGP02234	27.6113	20.2224	21.1806	6.6348	3.8607	5.4459	-2.15699	2.25771e-33	EGP02234	down
EGP33690	14.5246	13.2499	13.4409	26.8452	28.9087	30.3602	1.02169	2.31637e-33	EGP33690	up
EGP26174	27.9601	28.0298	24.9596	68.3017	57.4601	58.0757	1.14236	2.51279e-33	EGP26174	up
EGP13233	13.6477	14.7046	13.403	28.1537	33.2433	32.1576	1.1239	3.34803e-33	EGP13233	up
EGP30387	0.1456	0.0959	0.0788	4.2426	9.3115	5.0939	5.79768	3.39549e-33	EGP30387	up
EGP06962	1.1052	1.4113	1.8446	11.3387	9.323	12.4804	2.89961	4.15684e-33	EGP06962	up
EGP23800	15.8719	16.0239	14.8142	6.6465	6.1148	5.5129	-1.39341	6.12629e-33	EGP23800	down
EGP11773	11.8193	12.6559	9.2889	38.3583	31.754	43.6938	1.71019	7.3775e-33	EGP11773	up
EGP19170	45.4413	40.415	50.501	16.7454	20.3161	15.4583	-1.41593	7.44218e-33	EGP19170	down
EGP07371	3.679	2.6902	1.5186	46.0974	51.8973	63.7096	4.31375	7.65649e-33	EGP07371	up
EGP14586	10.8494	9.5529	9.9602	25.6284	26.4825	23.7783	1.28029	7.91336e-33	EGP14586	up
EGP06872	0.0954	0.0855	0.0803	1.9752	1.8384	1.8935	4.40117	1.30439e-32	EGP06872	up
EGP18706	1.8607	1.1923	1.2477	31.0021	17.7437	33.4466	4.21026	1.35569e-32	EGP18706	up
EGP28715	1.7986	1.6403	2.1133	7.6264	7.3982	8.4686	2.04377	1.76744e-32	EGP28715	up
novel.2001	0.8174	0.8999	0.9855	16.2058	11.3546	7.7081	3.67197	1.90368e-32	--	up
novel.1357	1.3665	1.4953	1.1949	7.4361	6.0404	5.846	2.20947	2.08411e-32	--	up
EGP10087	49.7867	50.3943	38.9853	184.265	120.215	147.097	1.65743	2.10457e-32	EGP10087	up
EGP22202	7.2535	7.6133	6.324	16.6835	15.1497	16.9403	1.16075	2.83302e-32	EGP22202	up
EGP14027	64.4192	56.3038	75.0581	27.9955	25.0079	26.2577	-1.34537	3.47358e-32	EGP14027	down
EGP21398	117.793	139.56	98.6649	346.696	288.434	301.841	1.35616	3.47792e-32	EGP21398	up
EGP12766	8.9984	8.1987	10.5817	32.1152	26.3036	26.3696	1.57116	3.51359e-32	EGP12766	up
novel.1734	59.4493	39.4976	74.6035	12.7704	13.2474	13.7863	-2.16596	3.64001e-32	--	down
EGP04332	10.3306	10.5331	12.5575	26.5229	25.1409	28.412	1.22152	4.22371e-32	EGP04332	up
EGP14030	6.5391	6.7002	5.6442	15.8583	14.4733	15.6558	1.24159	4.61157e-32	EGP14030	up
EGP16907	2.5181	2.6499	3.3662	11.5513	9.7321	9.8315	1.83139	5.28322e-32	EGP16907	up
novel.635	118.018	102.983	90.3048	240.582	244.369	291.522	1.27731	6.92267e-32	--	up
EGP16631	1.6551	2.5453	1.9873	12.7461	8.8294	14.8372	2.5186	7.65546e-32	EGP16631	up
EGP23451	0.3709	0.4813	0.2342	4.7568	6.0725	4.1431	3.73591	8.98241e-32	EGP23451	up
EGP05632	4.8728	5.2872	5.1365	1.1286	1.3334	1.639	-1.94186	1.02575e-31	EGP05632	down
EGP26180	55.2786	55.9443	55.1067	17.7306	26.0359	19.3782	-1.43645	1.12984e-31	EGP26180	down
novel.436	0.7944	0.7417	0.9197	3.526	3.2288	3.3092	1.99821	1.13782e-31	--	up
EGP04801	1.375	1.7258	0.8684	7.3734	7.447	7.1769	2.42332	1.33052e-31	EGP04801	up
EGP26716	5.133	4.7088	4.7311	12.7343	12.7789	14.0934	1.39972	1.6798e-31	EGP26716	up
EGP10991	7.1714	7.469	4.741	19.7559	21.8148	22.826	1.69042	1.70575e-31	EGP10991	up
novel.1352	0.2728	0.5769	0.6891	9.5428	7.3802	9.0919	4.07429	1.77028e-31	--	up
EGP06316	69.6821	63.7437	61.8894	27.2776	34.1904	26.5195	-1.18986	2.31209e-31	EGP06316	down
EGP05448	3.6405	3.6962	3.7105	9.0973	9.6295	9.8197	1.3298	3.1006e-31	EGP05448	up
EGP00496	15.2245	17.8146	18.6708	2.8527	4.4154	2.2574	-2.47285	3.41775e-31	EGP00496	down
EGP25748	3.6621	3.6306	3.6824	1.7873	1.7203	1.9322	-1.05396	4.10008e-31	EGP25748	down
EGP09222	3.4772	4.2747	3.6556	13.3298	13.4722	11.0333	1.69228	5.10317e-31	EGP09222	up
EGP12857	0.1907	0.0906	0.1134	2.4732	2.7255	1.7668	4.07739	5.94363e-31	EGP12857	up
EGP26181	280.578	306.399	288.418	90.5762	132.907	111.492	-1.42506	6.25462e-31	EGP26181	down
EGP28784	97.5323	78.4537	100.437	274.432	204.954	267.849	1.39319	6.35985e-31	EGP28784	up
EGP25429	22.6171	22.0805	28.9724	79.1118	60.4371	76.5919	1.51246	6.41115e-31	EGP25429	up
EGP24002	6.4259	8.7117	5.4109	30.7989	26.0602	28.8126	2.01789	7.9134e-31	EGP24002	up
EGP15510	5.216	5.3253	5.8517	13.7467	15.3117	13.1556	1.3271	7.95929e-31	EGP15510	up
EGP28170	257.135	223.989	238.387	86.3389	113.611	113.173	-1.24058	8.21665e-31	EGP28170	down
EGP23681	1.9966	2.1848	2.2632	15.3071	12.8374	22.3299	2.92998	8.37418e-31	EGP23681	up
EGP19475	16.5343	15.8726	15.0794	53.1232	53.0667	37.3014	1.55557	1.23545e-30	EGP19475	up
novel.1507	0.3389	0.2443	0.3746	8.0474	8.0625	6.3008	4.51198	1.73737e-30	--	up
EGP16252	2.0161	1.2028	1.6245	10.0672	8.8332	10.9911	2.5754	1.83243e-30	EGP16252	up
EGP28764	10.4099	11.6667	11.9824	26.6914	25.6369	24.1052	1.12825	1.95859e-30	EGP28764	up
EGP00714	3.9468	3.8518	4.7385	12.8659	11.895	12.7379	1.54352	2.24667e-30	EGP00714	up
EGP08925	18.6078	16.6244	17.492	8.2896	7.9143	7.0173	-1.22279	2.67133e-30	EGP08925	down
EGP21907	14.8716	13.0385	14.4339	35.425	28.4889	36.3336	1.20182	3.5455e-30	EGP21907	up
EGP14201	14.3993	16.1575	18.0777	0	0.0971	0.1626	-7.61063	3.70026e-30	EGP14201	down
EGP31503	142.103	177.284	181.529	354.37	351.338	361.322	1.05054	5.18973e-30	EGP31503	up
EGP02443	3.0899	3.1525	3.5024	14.8167	12.4165	13.1195	2.01273	5.69111e-30	EGP02443	up
EGP02454	0.0858	0.0989	0.1324	1.955	1.6319	1.4527	3.96929	6.59469e-30	EGP02454	up
EGP06058	10.3164	9.6812	11.0166	32.4947	45.4592	32.9947	1.80075	6.77825e-30	EGP06058	up
EGP12546	2.9657	3.5784	3.9763	16.0757	30.2872	17.0208	2.55535	8.53493e-30	EGP12546	up
EGP30012	10.043	10.2963	12.1287	25.927	28.9609	27.5985	1.30788	8.83413e-30	EGP30012	up
EGP10090	3.6507	4.3366	3.3499	11.3415	12.103	10.217	1.53027	9.12376e-30	EGP10090	up
EGP16978	0	0	0	20.4816	22.7438	22.7033	13.388	9.14194e-30	EGP16978	up
EGP13151	25.1386	26.7209	28.771	52.7882	67.7105	60.5228	1.12697	1.14233e-29	EGP13151	up
EGP19848	13.6613	14.9972	16.9087	3.5381	2.5181	2.4684	-2.45621	1.20224e-29	EGP19848	down
novel.1158	6.0306	5.9366	8.1993	0.2702	0.387	0.24	-4.51843	1.30081e-29	--	down
EGP30709	37.953	36.2381	33.8221	77.1537	67.7854	77.7748	1.00211	1.37877e-29	EGP30709	up
EGP05097	0.1392	0.3009	0.1318	1.7642	1.918	2.2826	3.34553	1.57696e-29	EGP05097	up
EGP02326	2.6414	2.6983	2.6308	7.4152	8.3467	9.4882	1.62261	1.78919e-29	EGP02326	up
EGP29864	0.4355	0.7991	0.7001	12.6493	27.3663	17.3172	4.85636	2.11363e-29	EGP29864	up
EGP05132	41.9169	40.9433	40.6131	106.419	78.6568	96.7515	1.1496	2.42317e-29	EGP05132	up
EGP00686	585.299	581.172	542.283	241.292	316.913	259.238	-1.10329	2.54466e-29	EGP00686	down
novel.1061	7.4548	5.7472	6.5911	0.5981	0.3953	0.4413	-3.82925	2.70823e-29	--	down
EGP34474	104.023	95.3102	113.598	2.386	0.5807	0.8477	-6.40039	2.73342e-29	EGP34474	down
EGP18339	3.5524	3.8709	2.9314	8.6319	8.1124	8.448	1.24075	2.95805e-29	EGP18339	up
EGP31495	116.028	93.9258	130.143	365.15	267.151	338.474	1.47168	4.31248e-29	EGP31495	up
EGP05703	25.0591	23.8979	26.2416	10.1096	12.4759	12.6673	-1.13337	5.86051e-29	EGP05703	down
EGP25912	1674.38	1560.48	1673.69	568.35	781.3	781.616	-1.24386	6.43861e-29	EGP25912	down
EGP31343	27.48	24.9632	28.3217	72.3103	53.9225	65.07	1.20295	9.81659e-29	EGP31343	up
EGP24213	480.895	532.004	480.278	199.285	268.667	226.128	-1.14476	1.07229e-28	EGP24213	down
EGP00807	374.985	373.555	380.208	123.974	183.545	160.157	-1.31093	1.09715e-28	EGP00807	down
EGP08971	17.14	16.9493	14.7718	39.4121	44.6557	35.6553	1.25249	1.6013e-28	EGP08971	up
EGP24232	0	0.0527	0.0289	15.1711	19.0137	17.542	9.34415	1.71477e-28	EGP24232	up
novel.197	21.4912	20.6193	22.5199	0	0	0	-13.059	2.13224e-28	--	down
EGP16393	51.6191	65.1396	55.6303	12.9977	16.738	22.5283	-1.76281	2.41696e-28	EGP16393	down
EGP28004	4.7651	4.5353	3.4491	11.3664	14.5659	14.0947	1.60751	2.46629e-28	EGP28004	up
EGP15681	29.9427	28.0554	34.2526	101.515	70.5051	84.1412	1.43262	2.81578e-28	EGP15681	up
novel.1715	19.2434	18.7408	22.7237	0	0	0	-13.0403	3.02988e-28	--	down
EGP11314	64.3312	58.0671	66.7609	28.2947	29.51	35.0684	-1.0675	3.10517e-28	EGP11314	down
EGP10481	2.1905	1.9884	2.2288	9.6792	7.0159	8.7199	1.9464	3.80685e-28	EGP10481	up
EGP10339	5.0176	4.86	4.6999	12.0248	10.4644	11.4397	1.17692	4.25868e-28	EGP10339	up
EGP32018	13.7361	14.5251	16.7791	5.0155	5.0859	5.7444	-1.54735	4.59355e-28	EGP32018	down
EGP07177	2.5714	2.8744	1.9602	8.2083	7.8874	7.1777	1.60923	4.6075e-28	EGP07177	up
EGP14728	8.4543	8.9129	9.4436	20.8942	17.8041	19.2497	1.07255	4.6346e-28	EGP14728	up
novel.731	0.0084	0	0.0106	14.8006	16.0685	16.1748	11.2365	5.33377e-28	--	up
EGP10116	29.7855	31.9372	26.988	13.1463	15.2979	14.2719	-1.09418	5.55402e-28	EGP10116	down
EGP15275	1.0141	0.9511	0.8023	4.5732	3.3432	4.4149	2.10902	6.79067e-28	EGP15275	up
novel.2002	0.9027	1.527	0.5321	19.1225	15.2252	9.9279	3.85619	8.23079e-28	--	up
EGP07166	25.8	26.7992	22.9534	51.0403	59.6435	51.1428	1.05882	8.95986e-28	EGP07166	up
EGP30768	7.2859	7.6546	8.5121	3.4652	3.4422	2.9142	-1.29367	9.13518e-28	EGP30768	down
EGP03307	6.261	5.5495	5.077	13.9288	13.9673	12.9043	1.22959	1.08623e-27	EGP03307	up
EGP10112	20.0616	20.0745	21.7691	8.5219	10.1582	9.4021	-1.17948	1.10242e-27	EGP10112	down
EGP17805	15.2613	18.3258	23.5997	4.2478	4.5664	5.7754	-2.01216	1.22416e-27	EGP17805	down
EGP26120	6.0597	3.8723	7.2401	29.5724	26.4002	29.167	2.27166	1.38599e-27	EGP26120	up
EGP18943	9.2296	8.2086	9.5851	24.1687	19.7683	22.1212	1.24881	1.99208e-27	EGP18943	up
EGP16744	6.6528	7.5122	6.7613	14.9811	13.9494	17.4272	1.10678	2.14398e-27	EGP16744	up
novel.1291	69.713	67.3552	64.4779	0	0	0	-12.8039	2.33482e-27	--	down
EGP33185	5.1204	6.1606	7.2389	15.5427	16.4975	17.119	1.3712	2.48704e-27	EGP33185	up
EGP33410	2.888	2.9731	3.069	6.711	6.8026	5.8227	1.07585	2.49426e-27	EGP33410	up
EGP13377	27.5948	28.7497	25.375	13.1278	14.0473	10.8714	-1.14184	2.57025e-27	EGP13377	down
EGP08265	89.5433	93.7251	86.0339	39.0833	44.3826	42.4345	-1.13687	2.57626e-27	EGP08265	down
EGP25207	6.4765	5.6825	6.5994	15.9795	15.7009	14.4253	1.25759	2.8889e-27	EGP25207	up
novel.691	1.7424	0.8134	1.4934	9.7771	6.9428	8.3215	2.58184	3.967e-27	--	up
EGP02690	14.977	16.5901	15.2689	41.1433	31.797	46.5553	1.31018	4.51174e-27	EGP02690	up
EGP30021	5.9454	5.4801	5.2935	2.1142	1.5275	1.7053	-1.68683	5.52108e-27	EGP30021	down
EGP29663	161.266	150.686	104.403	375.609	345.309	396.458	1.38453	5.83564e-27	EGP29663	up
EGP20739	17.991	18.6037	17.8591	0	0	0	-12.7006	6.03103e-27	EGP20739	down
novel.1537	3.4102	2.5954	5.538	77.4132	185.472	139.049	5.08178	7.45977e-27	--	up
novel.870	1.4201	0.863	0.9219	4.6336	4.0272	3.4542	1.87486	9.49429e-27	--	up
EGP22915	1.0339	0.7666	1.1427	6.1046	4.3815	5.5147	2.40262	1.08684e-26	EGP22915	up
EGP12221	4.5372	3.934	3.4265	12.9651	10.3181	13.74	1.59257	1.16735e-26	EGP12221	up
EGP30764	21.9334	24.5216	17.8869	4.5126	6.9016	6.1641	-1.91134	1.23711e-26	EGP30764	down
EGP27918	8.9409	7.4998	8.1104	26.5896	23.6115	21.5354	1.50492	1.2615e-26	EGP27918	up
EGP31370	43.4258	46.8213	42.5939	22.7817	19.6639	25.2872	-1.01297	1.36414e-26	EGP31370	down
EGP10433	1.1675	1.3706	1.6326	5.7811	4.3992	6.2792	1.94415	1.43562e-26	EGP10433	up
EGP17870	6.3045	6.1189	5.5871	16.3007	12.947	16.3277	1.29674	1.45797e-26	EGP17870	up
novel.2148	0.0141	0	0.0178	20.6856	21.8769	21.0103	10.9266	1.47214e-26	--	up
EGP00118	11.3296	13.3519	10.6026	34.6094	27.0236	30.8899	1.34991	1.50508e-26	EGP00118	up
EGP28442	18.5864	16.6358	15.151	35.4509	33.805	39.4066	1.06668	1.54001e-26	EGP28442	up
EGP00550	3.9206	4.0299	3.4638	8.8247	9.0164	8.3018	1.15424	1.69317e-26	EGP00550	up
EGP25962	43.65	48.7279	42.6166	15.9832	12.2564	19.8756	-1.53068	1.6955e-26	EGP25962	down
EGP00077	19.7609	19.1784	15.0365	60.9766	49.9071	46.0198	1.49723	1.81991e-26	EGP00077	up
novel.2250	0	0.0138	0.0151	2.4304	1.9582	2.1787	7.88097	1.85113e-26	--	up
novel.1254	0.5747	0.756	0.5104	4.064	2.7542	5.5887	2.70945	1.96157e-26	--	up
novel.309	1.3689	1.9798	2.2505	7.8469	7.8322	9.9933	2.16543	2.05038e-26	--	up
EGP17030	23.2429	26.4614	19.3132	8.0839	10.1006	9.4978	-1.35762	2.11172e-26	EGP17030	down
EGP19572	4.6202	4.8194	4.8272	0.3784	0.3423	0.9765	-3.12682	2.18535e-26	EGP19572	down
EGP03217	15.9561	13.5369	12.6873	34.1278	35.9153	30.0325	1.20484	2.569e-26	EGP03217	up
EGP13176	3.8038	3.5829	3.0028	9.7377	10.2727	8.9333	1.4348	3.19659e-26	EGP13176	up
novel.1525	0.029	0.0334	0.0183	3.6154	3.7758	4.1068	7.09757	3.58702e-26	--	up
EGP30139	0.7563	0.567	0.4776	4.3896	3.4289	4.6552	2.73567	4.396e-26	EGP30139	up
EGP07367	182.45	141.089	199.809	435.818	380.275	446.454	1.22904	5.04488e-26	EGP07367	up
EGP13760	11.7916	10.6869	11.0512	25.7864	21.3541	23.2649	1.02876	5.12012e-26	EGP13760	up
novel.767	0.0179	0.0206	0.0226	2.5277	1.7924	1.867	6.63371	5.46424e-26	--	up
EGP09169	61.9399	76.1795	49.2844	168.251	152.571	177.377	1.37028	5.58787e-26	EGP09169	up
EGP20623	7.361	7.8158	7.0141	3.1097	3.0658	3.531	-1.2349	6.02373e-26	EGP20623	down
novel.1118	0.0104	0.0358	0	4.3723	3.1424	3.56	7.84793	6.71882e-26	--	up
novel.1741	1.7245	2.0774	1.8635	6.6277	6.156	6.8249	1.75303	7.22361e-26	--	up
EGP23698	0	0.0377	0	73.3205	69.4881	77.8649	12.3935	9.46973e-26	EGP23698	up
EGP00235	91.7503	104.983	103.83	235.753	219.217	182.503	1.04471	1.04086e-25	EGP00235	up
novel.550	2.2697	3.1801	2.4421	0.0789	0.1694	0.021	-4.8764	1.30599e-25	--	down
EGP05758	12.5944	12.0922	8.9498	29.7948	27.0285	28.9818	1.30794	1.4455e-25	EGP05758	up
EGP01067	19.1982	21.0999	18.6735	0	0	0	-12.3597	1.4776e-25	EGP01067	down
EGP00309	23.7399	21.5102	18.8659	8.1696	7.4728	7.8736	-1.4896	1.57383e-25	EGP00309	down
EGP28171	2228.3	2104.69	2276.5	369.188	611.197	501.926	-2.19649	1.59295e-25	EGP28171	down
EGP21381	9.2	9.5831	10.6398	22.5519	23.1401	21.81	1.16069	1.66736e-25	EGP21381	up
EGP17334	10.9553	12.7269	9.9362	28.2906	24.7048	27.2842	1.21456	1.72819e-25	EGP17334	up
EGP11386	114.641	123.603	142.401	60.0759	70.2431	59.6725	-1.04264	1.74059e-25	EGP11386	down
novel.733	1.0572	1.0932	1.013	6.7535	7.0599	6.2873	2.62743	1.76369e-25	--	up
EGP20657	22.8521	25.5643	22.2	7.2526	10.262	10.6231	-1.36759	2.7324e-25	EGP20657	down
EGP16352	0.4735	0.1425	0.39	3.4036	3.7104	3.6278	3.36229	2.76979e-25	EGP16352	up
EGP00770	2.6116	2.802	1.9945	17.4473	14.4138	12.1449	2.52537	2.79395e-25	EGP00770	up
EGP19859	1.0642	1.1438	0.8249	5.1331	5.4693	7.3455	2.51776	3.51239e-25	EGP19859	up
EGP26804	1.2791	1.5917	1.7006	6.8671	10.0227	9.0863	2.47476	3.51282e-25	EGP26804	up
EGP09953	3.9482	3.7455	4.0154	9.2386	9.8153	10.2104	1.28119	4.146e-25	EGP09953	up
EGP11447	9.821	9.637	9.5313	24.5436	19.8575	25.9146	1.23648	4.29705e-25	EGP11447	up
novel.143	20.0095	18.8101	18.099	42.6846	41.6192	38.2367	1.06499	4.88787e-25	--	up
novel.1684	0.4409	0.3699	0.5949	2.7612	2.4455	2.2292	2.37118	5.05816e-25	--	up
novel.1765	0.0083	0.0096	0	9.5394	9.6586	10.4703	10.5816	5.81723e-25	--	up
EGP31693	72.5529	73.5642	87.4849	18.4151	32.1558	25.4175	-1.65968	6.51588e-25	EGP31693	down
EGP16085	67.0301	50.3873	67.0234	26.671	28.0321	22.2187	-1.30177	7.50112e-25	EGP16085	down
EGP10512	1.1409	1.2787	0.9933	3.076	3.1677	3.3673	1.45123	7.81695e-25	EGP10512	up
EGP12757	7.9534	6.7882	5.8794	15.2546	18.0034	15.8934	1.21159	7.89086e-25	EGP12757	up
EGP00684	0.9824	1.2663	1.1191	5.3301	6.0591	4.4776	2.20194	9.17029e-25	EGP00684	up
EGP05412	12.2481	11.0994	12.5234	23.7138	30.0333	27.42	1.13819	9.26681e-25	EGP05412	up
EGP05840	22.2576	22.0703	23.5334	8.8903	11.8217	10.8426	-1.14434	1.11677e-24	EGP05840	down
EGP10072	6.9606	8.8732	6.5001	20.7	17.439	19.4476	1.32601	1.1217e-24	EGP10072	up
novel.821	13.5229	14.4332	14.874	0	0	0	-12.1332	1.12436e-24	--	down
EGP24990	0.2692	0.2608	0.3536	1.856	1.8443	2.1533	2.69535	1.17898e-24	EGP24990	up
EGP19664	16.7566	15.1196	13.9232	7.9157	7.0948	8.0972	-1.02895	1.21887e-24	EGP19664	down
EGP07310	0.1258	0	0	6.0198	6.4234	5.4099	6.94279	1.25201e-24	EGP07310	up
EGP32463	48.1558	43.8256	41.8659	23.2431	20.1542	25.1534	-1.00717	1.33185e-24	EGP32463	down
EGP14278	0.88	0.346	0.2779	4.9009	4.6343	5.0239	3.201	1.43857e-24	EGP14278	up
EGP05421	0.0786	0.0363	0.0993	2.4527	2.4121	1.9263	4.95527	1.4429e-24	EGP05421	up
EGP30962	0.9276	1.048	1.3389	5.571	9.3238	5.5832	2.5961	1.72754e-24	EGP30962	up
EGP05229	0.3474	0.5892	0.3097	4.0251	3.82	3.039	3.08848	2.36699e-24	EGP05229	up
EGP28027	3.9087	6.0384	3.8499	16.65	15.8561	18.1055	1.83583	3.33017e-24	EGP28027	up
EGP28195	79.6827	77.479	65.353	5.0025	2.9031	7.6322	-3.88369	3.37253e-24	EGP28195	down
novel.2316	5.0677	6.3279	5.237	0.3437	0.2813	0.157	-4.43839	3.47816e-24	--	down
EGP16610	48.4133	48.736	47.9589	102.683	85.1051	111.719	1.00428	3.8439e-24	EGP16610	up
EGP00048	2.4662	3.2897	2.8441	11.2147	8.5464	9.461	1.72726	3.88219e-24	EGP00048	up
EGP31366	1.9951	2.1965	1.489	7.3368	6.7001	7.5935	1.88263	3.98379e-24	EGP31366	up
EGP15795	18.2969	19.0623	16.995	48.2871	35.7185	40.3632	1.15319	4.22149e-24	EGP15795	up
EGP26858	0.0263	0.0911	0.0665	5.8051	13.1187	4.1799	6.97385	5.31273e-24	EGP26858	up
EGP24138	277.828	223.596	298.153	123.39	132.212	140.337	-1.055	5.80248e-24	EGP24138	down
EGP07473	14.9613	17.8125	16.7382	8.5589	8.7455	7.4893	-1.03643	5.8097e-24	EGP07473	down
EGP30646	20.6359	29.3007	23.9046	9.3699	10.9336	9.4735	-1.34883	5.95419e-24	EGP30646	down
EGP30715	12.3473	9.6389	10.1917	4.6395	3.3872	4.2665	-1.43095	7.25304e-24	EGP30715	down
novel.2149	0	0	0	24.6867	27.1474	24.9303	11.9232	7.36367e-24	--	up
EGP23840	0.7088	0.9083	0.4974	6.2175	5.3483	4.2322	2.85582	7.49759e-24	EGP23840	up
EGP15736	1.4865	2.0551	2.0391	0.277	0.2094	0.3322	-2.81406	9.04064e-24	EGP15736	down
novel.1632	5.4427	5.0033	5.828	0	0	0	-11.8983	9.58937e-24	--	down
EGP33548	2.7432	1.9655	2.9399	11.0628	14.6564	10.9605	2.2235	1.3195e-23	EGP33548	up
EGP28473	3.6559	3.5777	2.5787	9.7979	9.9035	8.8018	1.4942	1.46492e-23	EGP28473	up
novel.463	10.2146	10.1175	11.5686	5.4177	5.0018	4.7047	-1.11572	1.49788e-23	--	down
novel.1839	1.6222	1.7447	1.9435	4.0304	3.8888	4.0287	1.1325	1.54148e-23	--	up
EGP00302	79.9189	67.9396	90.6075	40.4798	41.7776	39.4179	-1.01148	1.76145e-23	EGP00302	down
EGP04652	14.1922	15.0292	14.0069	6.3615	7.0174	7.735	-1.07491	1.89295e-23	EGP04652	down
EGP08884	5.6203	4.6919	2.9747	25.6691	17.4365	22.2762	2.24794	1.91117e-23	EGP08884	up
EGP21666	7.401	9.4512	7.6184	16.9606	17.2876	17.8471	1.05063	1.97138e-23	EGP21666	up
EGP28434	5.7032	6.5779	4.7255	21.8534	14.7606	18.6174	1.65715	1.98112e-23	EGP28434	up
EGP02965	9.5986	9.6145	9.9268	5.0003	4.911	3.784	-1.12801	2.01594e-23	EGP02965	down
novel.846	9.7533	8.4696	10.5819	0	0	0	-11.8168	2.16171e-23	--	down
EGP26292	122.178	85.3653	99.0763	529.61	647.798	421.537	2.34296	2.24115e-23	EGP26292	up
EGP01228	6.7111	5.9343	6.064	2.2396	2.2153	2.2151	-1.52952	2.51983e-23	EGP01228	down
EGP30312	19.1583	19.6913	11.7505	46.4612	61.0662	53.9685	1.63416	2.84239e-23	EGP30312	up
EGP14135	19.1659	16.8479	16.2913	40.511	37.6331	33.7607	1.05575	2.86363e-23	EGP14135	up
EGP06195	0.4033	0.5233	1.0824	6.8566	7.8441	7.8123	3.4827	2.98149e-23	EGP06195	up
EGP31489	2.3513	2.5281	3.2216	11.6821	10.9302	10.0113	1.97816	3.10479e-23	EGP31489	up
EGP17921	4.9335	5.2678	3.6191	12.2513	14.1083	13.8662	1.49775	3.19465e-23	EGP17921	up
EGP03157	2.2718	2.8667	2.2586	6.3824	6.3704	7.4635	1.41021	3.22017e-23	EGP03157	up
EGP07045	9.4162	8.3429	9.5532	3.1545	2.3014	1.8715	-1.93636	3.22606e-23	EGP07045	down
EGP11627	2.1897	1.9868	1.5304	6.3502	5.6052	6.8051	1.66915	3.355e-23	EGP11627	up
EGP16278	31.1758	28.8266	28.2453	67.016	93.8376	122.641	1.64266	4.19805e-23	EGP16278	up
EGP09863	14.5258	14.6351	14.1648	27.1488	33.6036	31.3842	1.04852	4.84169e-23	EGP09863	up
novel.661	0.6711	0.903	0.8476	3.803	5.4044	4.0302	2.41901	5.12467e-23	--	up
EGP09381	5.3208	4.8287	5.0757	1.5597	1.9279	1.8024	-1.56522	6.11157e-23	EGP09381	down
EGP10091	3.5339	3.7657	3.6387	9.0227	8.1125	7.9849	1.16015	6.79818e-23	EGP10091	up
novel.1955	4.3104	3.5675	4.0925	0	0	0	-11.6519	8.61392e-23	--	down
EGP16190	5.4511	6.151	5.216	14.9964	13.4457	13.1533	1.26619	9.78269e-23	EGP16190	up
novel.2173	4.6186	3.8969	5.442	0.5815	0.2776	0.5811	-3.32722	9.86219e-23	--	down
EGP08904	23.4337	23.0475	28.711	11.5818	11.5663	9.4265	-1.24551	1.10815e-22	EGP08904	down
EGP04638	5.3851	4.1475	4.9488	1.3216	1.0614	1.3639	-1.99512	1.39125e-22	EGP04638	down
EGP00854	0	0	0	19.3826	16.907	20.5525	11.5947	1.40061e-22	EGP00854	up
EGP15862	3.7874	3.7771	3.2371	1.0351	0.7969	1.0321	-1.95987	1.41802e-22	EGP15862	down
EGP12073	9.3456	8.8663	8.8678	2.8349	4.0077	3.6415	-1.40874	1.45795e-22	EGP12073	down
EGP31989	65.2528	53.8677	66.3782	25.9604	23.9433	18.1688	-1.48488	1.55283e-22	EGP31989	down
EGP21179	18.7211	16.8574	23.0699	41.7177	43.6587	44.3712	1.10575	1.60712e-22	EGP21179	up
EGP13968	2.3889	2.4751	1.8923	10.6346	8.9293	13.7136	2.25326	1.61024e-22	EGP13968	up
EGP11580	2.547	1.6351	1.8817	9.6917	6.9935	9.3693	2.05427	1.62476e-22	EGP11580	up
EGP14769	0	0	0	15.1253	26.3944	15.4863	11.6951	1.65456e-22	EGP14769	up
EGP18709	4.2601	5.0092	2.935	16.996	13.5015	13.656	1.8114	1.94285e-22	EGP18709	up
EGP00626	5.717	5.9706	5.8423	15.396	12.2068	12.0748	1.13854	2.04958e-22	EGP00626	up
EGP13754	3.3955	3.5865	2.799	10.6029	13.4037	11.1674	1.80407	2.22942e-22	EGP13754	up
EGP10085	0	0.0974	0	117.674	91.8423	102.219	11.5249	2.25036e-22	EGP10085	up
EGP28711	20.8946	22.7351	23.7355	48.3821	50.1635	47.2996	1.07695	2.2972e-22	EGP28711	up
EGP07254	2.8572	3.067	2.8466	6.2579	6.4602	6.2695	1.07461	2.42308e-22	EGP07254	up
EGP20813	42.8764	23.0508	25.2727	0	0	0.0293	-11.6253	2.48373e-22	EGP20813	down
EGP26134	3.5707	3.0143	3.6176	8.3823	7.0163	7.6148	1.13251	2.93265e-22	EGP26134	up
EGP08962	4.2353	3.9196	3.7478	10.824	10.2772	10.5546	1.36792	3.44185e-22	EGP08962	up
EGP12536	3.8681	3.2066	3.0535	20.6926	11.2761	17.3224	2.23699	4.04973e-22	EGP12536	up
EGP06027	7.9216	7.5123	5.9292	0.344	0.1971	0.44	-4.50317	4.11084e-22	EGP06027	down
EGP20686	0	0	0	6.3782	6.7172	7.2189	11.4588	4.17024e-22	EGP20686	up
EGP14970	16.9881	17.5084	13.7878	33.8781	35.2846	38.9665	1.12056	4.34326e-22	EGP14970	up
EGP13046	67.0522	57.7243	54.1951	30.4461	25.1764	32.2426	-1.06799	4.40454e-22	EGP13046	down
novel.1026	0	0.0125	0	11.7201	13.7326	12.0326	11.434	4.43481e-22	--	up
EGP04767	0.6472	1.6589	0.931	6.4295	5.7962	6.5834	2.50565	4.7552e-22	EGP04767	up
EGP15727	10.9065	10.2963	8.507	0.0156	0.0149	0	-9.93168	5.11238e-22	EGP15727	down
EGP02677	3.8149	3.5579	3.9715	11.008	11.3437	8.4554	1.40274	5.26915e-22	EGP02677	up
EGP05833	6.3691	5.6617	4.6223	17.0193	14.102	13.501	1.37847	6.38175e-22	EGP05833	up
EGP16688	8.7429	7.4971	8.3541	2.0057	1.5744	0.9026	-2.48988	6.55154e-22	EGP16688	down
EGP02855	17.0782	14.4638	16.5168	7.9807	7.1346	7.6301	-1.12069	6.72469e-22	EGP02855	down
EGP26854	6.9434	6.4419	4.8319	14.7349	15.7165	16.0882	1.30886	7.27985e-22	EGP26854	up
EGP21563	0	0.0733	0	7.7494	5.9283	8.1805	8.20942	7.38492e-22	EGP21563	up
EGP13677	210.667	218.647	187.262	89.1727	76.5774	114.734	-1.17719	7.50059e-22	EGP13677	down
EGP11030	12.2612	12.9198	12.0425	6.3486	5.3145	5.6146	-1.14795	8.11893e-22	EGP11030	down
EGP18750	4.1792	3.9033	2.6776	9.7116	9.0007	10.7394	1.40943	1.02499e-21	EGP18750	up
EGP32394	0.9506	0.663	1.089	4.1216	5.0982	4.7247	2.32994	1.07267e-21	EGP32394	up
EGP09754	0.1785	0.3632	0.1061	2.1539	1.7039	1.9941	3.13023	1.1358e-21	EGP09754	up
novel.984	2.6257	2.4664	2.7309	1.2038	1.2128	1.1412	-1.17607	1.19269e-21	--	down
EGP07193	3.2011	3.9583	3.149	9.0946	8.1832	10.1938	1.37329	1.39422e-21	EGP07193	up
EGP26194	0.1227	0.2123	0.0387	3.2734	3.8808	4.2943	4.87328	1.53328e-21	EGP26194	up
EGP07184	0	0	0.0168	15.0858	12.6267	13.8636	11.2808	1.57961e-21	EGP07184	up
EGP06150	44.9924	33.6208	30.5837	85.2124	85.7227	84.9076	1.18651	1.70857e-21	EGP06150	up
EGP32568	7.1292	7.8715	7.5146	3.0492	3.5359	3.583	-1.1866	1.71323e-21	EGP32568	down
EGP12788	1.3774	1.7739	1.3918	8.021	5.3451	9.5823	2.29516	1.85386e-21	EGP12788	up
EGP26667	10.3342	8.8012	8.8171	26.7617	23.3283	20.9125	1.30259	1.99619e-21	EGP26667	up
EGP23820	21.5416	28.2503	28.962	12.6289	11.6285	12.2246	-1.14993	2.11982e-21	EGP23820	down
novel.1129	0	0	0.0138	12.5494	10.1559	10.6271	11.247	2.22106e-21	--	up
EGP15829	8.1255	7.6896	7.4561	0.6514	0.3887	0.434	-4.02266	2.36792e-21	EGP15829	down
novel.1668	2.1008	1.6792	1.7155	0.3666	0.4266	0.2931	-2.37553	2.61905e-21	--	down
EGP30078	62.4827	66.4215	47.1544	14.5518	24.3974	20.9014	-1.59552	3.03552e-21	EGP30078	down
EGP30939	9.8198	6.7569	6.1311	52.4668	28.6058	30.751	2.25439	3.31336e-21	EGP30939	up
novel.2006	26.017	26.3731	23.9163	64.9161	76.0856	50.2165	1.28611	3.57546e-21	--	up
EGP26076	12.1745	11.8407	14.0158	5.2624	4.2923	5.9624	-1.33578	3.81587e-21	EGP26076	down
EGP06462	6.0294	6.7299	4.8826	13.9397	16.52	17.5623	1.40229	4.23274e-21	EGP06462	up
EGP14311	0.276	0.6368	0.4358	8.6582	6.6439	10.0049	4.20797	4.26364e-21	EGP14311	up
EGP15937	7.3408	8.2682	8.8554	16.1889	19.1153	16.8971	1.05575	4.56183e-21	EGP15937	up
EGP15977	10.6427	9.9527	9.8497	24.9387	23.2729	18.8928	1.1	5.7178e-21	EGP15977	up
EGP07298	0.8936	0.7627	0.8578	3.4784	3.8811	3.5066	2.07049	5.86161e-21	EGP07298	up
novel.932	13.7966	12.1573	13.4878	0	0	0	-11.1416	6.1227e-21	--	down
EGP00821	33.9084	30.3981	35.3287	5.4354	9.7956	11.3918	-1.94578	7.12474e-21	EGP00821	down
EGP07825	12.1462	12.0108	11.8632	6.2441	6.186	5.8805	-1.01598	7.586e-21	EGP07825	down
EGP12959	1.6155	1.7823	1.2125	7.5494	7.6793	5.2962	2.11162	7.70945e-21	EGP12959	up
novel.2164	0.0355	0.0246	0.0628	1.1734	0.7707	0.7362	4.43257	8.67854e-21	--	up
EGP24269	1270.56	1333.62	1240.64	420.427	674.293	583.508	-1.23555	8.68656e-21	EGP24269	down
novel.1236	0	0	0	2.4262	2.7145	2.4379	11.0949	9.07207e-21	--	up
EGP16353	3.5089	2.7838	2.5875	8.2047	8.31	9.0748	1.47964	9.38327e-21	EGP16353	up
EGP17753	115.885	115.103	114.32	41.7363	63.3492	55.181	-1.14712	1.10633e-20	EGP17753	down
EGP21592	4.9784	4.7258	4.4687	1.7053	1.5028	1.905	-1.51515	1.11858e-20	EGP21592	down
novel.1736	18.192	18.6379	15.6551	6.2116	5.2963	7.8284	-1.4851	1.22283e-20	--	down
novel.495	0.0462	0	0.1167	3.5212	3.1549	3.1758	5.93285	1.22716e-20	--	up
EGP14269	166.445	175.596	126.139	353.395	357.67	302.558	1.07498	1.26261e-20	EGP14269	up
novel.1429	0	0	0	7.8813	6.6625	7.2177	11.0417	1.44524e-20	--	up
EGP30862	4.5613	5.3952	3.4812	0.569	1.0864	0.7277	-2.53058	1.48608e-20	EGP30862	down
EGP02482	10.2828	9.7093	10.425	4.8227	5.0188	5.5688	-1.02236	2.10621e-20	EGP02482	down
EGP28222	5.0496	5.212	3.9405	10.6347	12.1694	11.4157	1.22612	2.49709e-20	EGP28222	up
EGP02801	8.2346	8.7251	8.2112	3.28	3.771	3.6192	-1.27774	2.58884e-20	EGP02801	down
EGP30518	3.7603	3.4164	3.0779	8.5226	8.9363	9.0841	1.32746	2.86187e-20	EGP30518	up
EGP21207	2.4754	3.1533	2.8232	10.1801	7.1343	8.9808	1.59872	3.61702e-20	EGP21207	up
novel.1226	4.3593	4.7603	4.2919	10.32	9.2404	10.2334	1.11079	3.71019e-20	--	up
EGP02432	337.152	357.791	286.294	108.782	171.571	137.974	-1.26897	4.91606e-20	EGP02432	down
EGP30711	196.94	204.754	167	75.5697	104.713	95.4677	-1.08377	5.08357e-20	EGP30711	down
EGP17155	6.4705	7.2451	7.1321	16.3608	16.0428	13.3632	1.09655	5.43111e-20	EGP17155	up
EGP26594	39.3911	36.2358	52.3397	106.444	87.1088	103.222	1.17217	6.11882e-20	EGP26594	up
EGP11657	1.7077	1.8817	1.9066	0.0894	0.2731	0.1334	-3.49461	6.99499e-20	EGP11657	down
EGP16251	8.3038	6.9387	7.786	17.5106	15.3187	16.8375	1.06659	7.62926e-20	EGP16251	up
EGP11298	1.0067	0.4644	0.3815	11.2134	10.3677	10.9457	4.04686	8.08521e-20	EGP11298	up
EGP30878	16.9166	15.2925	13.7358	6.701	6.4342	6.4078	-1.27531	8.41134e-20	EGP30878	down
EGP05265	20.8448	13.4441	14.0993	52.4431	49.1337	39.8121	1.50428	1.0117e-19	EGP05265	up
EGP27917	7.6408	9.0115	9.0704	26.6749	26.9464	20.8935	1.49905	1.11814e-19	EGP27917	up
EGP07192	2.501	3.0163	2.6778	6.1625	7.2905	6.6638	1.25778	1.22761e-19	EGP07192	up
novel.576	480.243	467.935	377.058	202.172	197.922	257.047	-1.05261	1.23776e-19	--	down
EGP11282	31.1577	31.1449	31.4264	14.8779	15.468	17.4947	-1.01174	1.67723e-19	EGP11282	down
EGP07337	9.2988	9.1573	7.7672	20.018	16.3841	20.3425	1.07091	1.69941e-19	EGP07337	up
novel.1082	14.1081	12.259	14.7771	0	0	0	-10.7318	1.89004e-19	--	down
EGP17335	3.0569	3.377	4.0659	1.4337	1.6528	1.5645	-1.21344	2.034e-19	EGP17335	down
EGP08934	39.3383	27.8085	42.2387	0	0	0.1866	-9.31992	2.61061e-19	EGP08934	down
EGP29420	14.2911	14.7589	12.8429	5.4507	7.1347	6.9594	-1.1403	2.77002e-19	EGP29420	down
EGP07608	7.0789	5.9338	7.0845	31.8398	17.6241	23.1085	1.81061	2.94162e-19	EGP07608	up
EGP31485	6.8126	4.9784	4.2695	17.683	19.5021	27.2322	1.95502	3.62216e-19	EGP31485	up
EGP06545	13.6548	13.3311	14.9569	4.9161	3.8055	3.1865	-1.8537	3.67655e-19	EGP06545	down
EGP23429	18.1973	15.2213	13.6874	33.9774	30.3791	38.0512	1.07766	3.9649e-19	EGP23429	up
EGP01378	1.8184	1.9216	2.2062	5.8186	4.4421	5.0376	1.32525	4.12384e-19	EGP01378	up
novel.1575	7.8862	8.1623	8.368	3.2882	1.8541	2.7756	-1.66774	4.2761e-19	--	down
novel.1739	0.089	0.0257	0.0843	2.7644	2.0168	2.8632	5.21069	4.71997e-19	--	up
EGP17922	3.4855	1.7867	1.5705	9.5359	12.7094	10.2916	2.20052	4.73983e-19	EGP17922	up
EGP21595	3.5001	5.34	4.281	0.9351	0.496	0.9136	-2.52971	5.25993e-19	EGP21595	down
EGP06836	4.711	4.9611	3.4002	11.6994	12.742	12.3605	1.44857	6.19103e-19	EGP06836	up
EGP28172	2.7518	3.2925	3.7681	0.3619	0.547	0.3857	-2.9534	6.2229e-19	EGP28172	down
EGP21392	3.7031	4.14	4.5912	10.1223	8.6086	8.7591	1.10705	6.58192e-19	EGP21392	up
EGP02960	30.0496	28.3047	19.9317	55.7549	62.3308	61.1255	1.15421	6.59537e-19	EGP02960	up
novel.56	0.1827	0.1433	0.2123	0.917	1.4727	1.1875	2.69673	7.87516e-19	--	up
EGP10720	19.0369	13.1786	14.1757	105.263	62.4092	110.081	2.54028	8.0793e-19	EGP10720	up
EGP13443	1.5066	1.1295	1.5699	7.066	5.9028	9.0849	2.34762	9.11668e-19	EGP13443	up
EGP13694	3.813	3.5671	4.1204	8.7098	8.1099	8.0481	1.07357	1.28878e-18	EGP13694	up
novel.2065	35.1875	21.7339	25.9063	0.0543	0	0	-10.5045	1.35287e-18	--	down
novel.2254	4.9453	4.3809	5.1174	9.5185	10.5215	10.8157	1.05485	1.44652e-18	--	up
novel.1956	0.2764	0.255	0.1047	2.8195	2.6609	3.0398	3.6713	1.49991e-18	--	up
EGP25559	16.7793	17.9105	18.659	6.9217	7.4547	9.3403	-1.21129	1.52179e-18	EGP25559	down
EGP29598	0.9153	1.4561	1.5946	7.8454	6.4656	5.5223	2.29612	1.69529e-18	EGP29598	up
novel.41	0.1815	0.0698	0	10.0042	8.9416	9.3021	6.65767	1.75851e-18	--	up
EGP31435	2.3981	3.583	1.6521	14.1866	11.897	11.375	2.25107	1.78786e-18	EGP31435	up
EGP29274	3.764	4.1647	3.336	0	0	0	-10.4464	1.87799e-18	EGP29274	down
EGP33824	5.1034	5.5692	3.4512	11.442	16.7501	15.0868	1.57435	2.01823e-18	EGP33824	up
novel.499	6.5656	6.0293	5.9153	0.0133	0	0	-10.3717	2.17407e-18	--	down
EGP15739	1.449	1.6225	1.4393	0.0825	0.0945	0.2286	-3.53571	2.29073e-18	EGP15739	down
EGP29426	0.349	0.1789	0.2449	2.0231	2.257	2.6894	3.11437	2.30415e-18	EGP29426	up
novel.994	0.4869	0.5501	0.3138	1.8641	2.0021	2.6078	2.21162	2.37686e-18	--	up
EGP29927	13.2284	5.0439	5.771	108.421	122.461	129.296	3.8642	2.57703e-18	EGP29927	up
novel.586	1.5905	1.4549	1.6141	0	0	0	-10.3907	2.69082e-18	--	down
EGP30744	28.4285	26.9035	28.2838	52.8882	68.6088	52.2185	1.01551	2.86529e-18	EGP30744	up
EGP06877	13.4339	15.3641	9.3253	31.6354	30.4306	35.328	1.31162	3.11228e-18	EGP06877	up
novel.1932	5.9637	5.3007	6.9336	2.3522	1.6945	1.5271	-1.74565	3.28884e-18	--	down
EGP07349	1.6156	1.2578	1.7856	9.1403	8.1839	6.0575	2.29019	3.48012e-18	EGP07349	up
EGP18102	8.4648	8.584	8.9872	18.1721	23.4835	22.6402	1.26523	4.20468e-18	EGP18102	up
EGP26318	2.2346	2.183	1.3796	0.1466	0.2427	0.4481	-2.84112	4.2752e-18	EGP26318	down
novel.2400	0	0	0	3.5531	3.0477	3.1806	10.3268	4.62321e-18	--	up
EGP19206	63.7904	49.2068	57.5068	286.891	369.878	204.066	2.29645	5.5094e-18	EGP19206	up
EGP01280	6.6842	4.8862	3.9637	0.6991	0.8431	1.0589	-2.62576	5.55948e-18	EGP01280	down
EGP15850	1.3312	1.6271	1.3464	3.4139	2.9625	3.7118	1.18807	6.59243e-18	EGP15850	up
EGP05939	5.535	5.4599	4.4614	0.8539	0.4892	1.1377	-2.69322	7.22755e-18	EGP05939	down
EGP11175	6.1104	5.3105	6.3591	13.4462	14.8846	12.2347	1.15106	7.31703e-18	EGP11175	up
EGP15841	1.9173	2.1068	2.0945	5.1798	4.6262	5.4077	1.2749	7.62486e-18	EGP15841	up
EGP05345	127.762	145.591	135.95	55.8443	79.2289	74.7288	-1.004	7.93053e-18	EGP05345	down
EGP30866	47.0322	67.0017	38.9918	136.97	122.473	127.425	1.29849	8.18564e-18	EGP30866	up
EGP23798	1.2236	1.3354	1.3128	3.4402	3.903	3.7984	1.48692	8.58495e-18	EGP23798	up
EGP07396	23.163	25.2679	19.8165	7.7597	3.7042	6.8449	-1.94289	8.66886e-18	EGP07396	down
EGP30915	13.4916	11.8445	16.5648	5.7002	5.5898	6.5938	-1.26952	9.13105e-18	EGP30915	down
EGP02536	0.024	0.0138	0	2.3913	2.001	2.5938	7.3883	1.08985e-17	EGP02536	up
EGP04917	13.2298	14.1144	13.5893	5.6345	6.3377	7.6349	-1.1036	1.19702e-17	EGP04917	down
EGP16394	1.1303	1.9373	1.8836	0.1288	0.123	0.0785	-3.93396	1.25645e-17	EGP16394	down
EGP27612	6.6437	7.9094	5.1348	1.3673	2.5269	1.551	-1.89062	1.39102e-17	EGP27612	down
EGP24767	8.012	11.5175	7.0031	25.4255	22.1622	23.9444	1.39055	1.43531e-17	EGP24767	up
novel.507	1.8511	2.3542	2.6034	0.4575	0.6496	0.6502	-1.99185	1.43954e-17	--	down
EGP29966	2.9058	3.1405	2.5923	7.6243	7.0516	7.1869	1.29753	1.59898e-17	EGP29966	up
EGP28939	23.8172	21.7799	20.9505	81.0853	48.6576	62.1895	1.48568	1.79314e-17	EGP28939	up
EGP16285	2.8083	2.6546	2.6937	7.4274	7.0911	6.5709	1.32983	1.80624e-17	EGP16285	up
EGP33758	585.091	639.114	761.7	159.159	235.588	173.871	-1.84439	1.8137e-17	EGP33758	down
EGP23909	1.6408	2.957	1.101	9.3789	11.4798	11.9834	2.48393	1.85988e-17	EGP23909	up
EGP10074	3.3228	3.3127	3.2284	7.2795	5.7677	7.5405	1.01977	1.99176e-17	EGP10074	up
EGP22149	35.4402	34.9517	32.0834	16.2056	12.5448	18.0903	-1.17289	2.04589e-17	EGP22149	down
EGP19900	32.6007	40.9023	40.9761	0	0	0	-10.1499	2.05149e-17	EGP19900	down
EGP26664	2.9062	2.4216	2.4006	5.6232	5.715	5.9522	1.11731	2.0689e-17	EGP26664	up
EGP13450	39.0315	32.6638	35.8767	83.1792	88.1394	62.5522	1.08049	2.29832e-17	EGP13450	up
EGP00300	6.5838	6.7746	8.438	1.9677	2.0232	2.42	-1.80618	2.40178e-17	EGP00300	down
EGP33648	2.2903	2.2079	2.3747	8.0162	6.9644	7.6471	1.67905	2.44881e-17	EGP33648	up
EGP08938	0	0.0515	0	19.3251	21.9502	17.4164	10.0357	3.19191e-17	EGP08938	up
EGP26201	0.9588	0.2212	0.3229	14.2649	17.3399	18.3736	5.00274	3.21442e-17	EGP26201	up
EGP28478	2.9741	2.578	2.0533	8.8155	6.2865	9.1424	1.62556	3.23379e-17	EGP28478	up
EGP31048	28.4369	30.5783	26.7786	14.0685	17.2377	12.3264	-1.01403	3.25697e-17	EGP31048	down
EGP05897	0.4183	0.9166	0.4227	4.2668	5.2911	5.4366	3.05809	3.41403e-17	EGP05897	up
EGP25484	18.3699	16.8651	18.8403	6.1171	5.9224	3.6733	-1.81786	3.53016e-17	EGP25484	down
novel.997	5.4596	6.7622	5.8428	0	0	0	-10.0507	4.17852e-17	--	down
EGP00488	34.1056	32.7804	34.833	19.5552	13.2857	15.418	-1.1169	4.27713e-17	EGP00488	down
EGP01233	10.4528	9.3022	8.7147	21.7567	22.5606	17.3162	1.07348	4.34613e-17	EGP01233	up
EGP30838	0.856	0.6376	0.6081	2.8645	2.9344	3.6327	2.11402	4.41799e-17	EGP30838	up
EGP10447	23.0831	25.4859	20.2002	9.9698	12.4426	11.2263	-1.07129	4.54821e-17	EGP10447	down
novel.176	0.0927	0.107	0.2928	4.186	4.1002	4.5197	4.71511	4.68561e-17	--	up
EGP10054	8.285	7.8827	8.5083	19.3421	16.0721	16.2535	1.02608	4.73762e-17	EGP10054	up
EGP18960	7.3318	6.8945	6.3197	3.9692	3.1332	3.1782	-1.04005	5.03382e-17	EGP18960	down
EGP26811	20.8092	20.32	22.86	10.8412	12.0877	9.0422	-1.03904	5.07075e-17	EGP26811	down
novel.811	0	0.0105	0	3.6339	4.2019	3.453	9.95432	5.69747e-17	--	up
EGP26674	0.5704	0.8333	0.4643	3.463	2.1994	3.5961	2.2656	6.05783e-17	EGP26674	up
EGP22200	0	0	0	5.1354	4.9551	5.1244	9.9874	6.13339e-17	EGP22200	up
novel.1930	11.081	13.8404	10.3776	0	0	0	-10.0107	6.26637e-17	--	down
EGP28941	14.1586	12.8192	13.5913	39.6769	28.45	40.6099	1.37956	6.44672e-17	EGP28941	up
EGP18973	0.0226	0.0261	0.1143	2.0426	4.0776	2.1772	5.70888	7.06695e-17	EGP18973	up
EGP30503	5.7852	5.6933	5.5796	2.5806	2.0062	2.5738	-1.29555	7.92741e-17	EGP30503	down
EGP10195	6.619	6.8662	5.4416	15.5447	14.7971	12.3838	1.13345	8.44579e-17	EGP10195	up
EGP26176	5.3258	4.4834	4.6392	2.3058	2.347	1.7214	-1.21939	9.10169e-17	EGP26176	down
EGP19117	0.1511	0.1046	0.1527	3.5089	1.895	4.1179	4.49726	9.69636e-17	EGP19117	up
EGP28044	2.914	2.9273	2.802	6.9547	5.5033	6.0266	1.05546	9.84836e-17	EGP28044	up
EGP06710	6.0914	6.4109	7.7259	2.2617	2.1025	2.5693	-1.58538	1.27783e-16	EGP06710	down
EGP20044	21.1676	19.1005	21.9001	10.3657	8.6245	12.1963	-1.03767	1.45155e-16	EGP20044	down
EGP11658	7.119	6.6675	6.4903	1.0042	1.1385	1.6724	-2.45853	1.47776e-16	EGP11658	down
EGP16486	2.946	3.5825	2.7908	10.5881	9.2126	8.2442	1.5499	1.50364e-16	EGP16486	up
EGP33477	12.3635	10.1471	9.3607	58.1085	37.3851	72.6699	2.35791	1.55168e-16	EGP33477	up
EGP23787	0.8526	0.9834	0.9888	2.3629	2.9588	2.4508	1.42462	1.5701e-16	EGP23787	up
EGP00722	7.4049	7.5437	4.9858	15.2364	15.0465	18.1488	1.23797	1.58649e-16	EGP00722	up
EGP30989	51.8008	50.9111	42.4562	22.7034	15.8927	25.802	-1.21438	1.6418e-16	EGP30989	down
EGP26666	2.6988	3.1896	2.8617	13.0482	13.2034	7.6202	1.91602	1.75937e-16	EGP26666	up
EGP33526	0.1653	0.0572	0.0418	1.3958	1.7583	1.4464	4.02066	1.87504e-16	EGP33526	up
EGP21805	1.4351	1.2647	1.3137	3.1858	2.9422	3.3352	1.19416	1.9296e-16	EGP21805	up
EGP03416	2.231	1.6804	1.8978	7.1537	7.8492	8.3647	1.9616	2.07928e-16	EGP03416	up
EGP20701	0	0	0.082	26.5693	21.9503	22.883	9.77734	2.08007e-16	EGP20701	up
EGP26293	0.3181	0.5503	0.3013	8.2976	5.3406	8.3474	4.19293	2.15012e-16	EGP26293	up
EGP10055	7.004	9.1553	6.7823	26.7584	18.9479	22.4669	1.53078	2.21841e-16	EGP10055	up
EGP03181	17.6615	18.7705	12.9641	33.7189	36.0912	36.8649	1.06885	2.35466e-16	EGP03181	up
EGP07037	3.5013	3.1264	4.137	8.4245	7.1289	7.4703	1.0576	2.38467e-16	EGP07037	up
novel.1115	0	0	0	3.6154	2.6997	3.8751	9.84296	2.53361e-16	--	up
EGP18132	0.1779	0.1368	0.3746	5.7027	4.1166	6.2267	4.53316	3.02471e-16	EGP18132	up
EGP15772	37.6781	35.9854	35.5673	15.6561	11.5435	13.8788	-1.45373	3.16047e-16	EGP15772	down
EGP10384	37.8628	36.9215	34.0761	16.0981	16.0859	22.5819	-1.03297	3.25902e-16	EGP10384	down
EGP09449	10.4658	8.322	7.978	19.6503	25.083	18.8994	1.2078	3.45552e-16	EGP09449	up
EGP13537	0.4645	0.631	0.4303	1.9244	1.872	1.9222	1.86586	3.69586e-16	EGP13537	up
EGP21456	1.104	0.8875	0.8028	4.7855	4.3441	7.6512	2.53461	3.81447e-16	EGP21456	up
novel.352	4.4987	4.9416	3.1868	1.0605	0.9592	1.0114	-2.10112	3.9863e-16	--	down
EGP16488	3.7683	3.0918	2.9796	7.1484	8.0422	7.4088	1.15554	4.04951e-16	EGP16488	up
EGP01990	10.2173	9.9655	7.8012	19.2989	23.6842	20.981	1.15016	4.47308e-16	EGP01990	up
EGP27417	14.2925	17.4417	18.1688	0	0	0	-9.73815	4.74914e-16	EGP27417	down
EGP04519	31.8064	26.9984	36.1167	17.5445	12.6284	15.5086	-1.09674	4.98372e-16	EGP04519	down
EGP04057	4.8957	4.9056	5.3442	14.104	11.3824	10.4928	1.2096	5.2965e-16	EGP04057	up
novel.1631	1.3182	1.2047	1.2828	0	0	0	-9.70572	5.31065e-16	--	down
EGP30944	0.8785	0.8265	0.584	4.2013	3.183	3.4091	2.18673	6.01924e-16	EGP30944	up
novel.424	7.9684	8.1359	6.7648	2.7953	2.5956	2.7346	-1.53514	6.29217e-16	--	down
EGP03417	3.3923	2.6749	2.4047	10.7554	9.3773	7.9167	1.68057	6.41643e-16	EGP03417	up
EGP28212	23.0491	19.1201	14.1084	41.4043	44.1608	45.4986	1.1772	6.6568e-16	EGP28212	up
EGP31300	6.5256	6.9032	8.1372	15.8875	13.8887	14.7525	1.00832	6.67021e-16	EGP31300	up
EGP33632	16.961	22.4819	14.3507	7.9603	6.8164	8.7472	-1.23399	7.26407e-16	EGP33632	down
EGP02634	0	0	0.0753	21.8161	17.6241	18.7817	9.60549	7.41896e-16	EGP02634	up
novel.1002	3.6499	4.9715	3.4685	0.4891	0.3891	0.8254	-2.87956	8.38947e-16	--	down
EGP31594	204.901	226.306	160.867	76.7358	108.934	99.2279	-1.09445	9.23479e-16	EGP31594	down
EGP09409	0.3938	1.09	0.7958	8.6799	8.7277	6.2006	3.3583	9.29084e-16	EGP09409	up
EGP04894	0.0838	0.0242	0.0264	1.5469	2.016	2.6171	5.41415	9.672e-16	EGP04894	up
EGP33483	0.0463	0.0267	0.2341	2.8792	4.1233	1.4766	4.81426	1.09317e-15	EGP33483	up
EGP12824	5.1156	8.5002	9.3087	1.3555	2.0383	1.9505	-2.13832	1.1197e-15	EGP12824	down
EGP09099	8.2297	5.0945	7.3409	1.4174	1.4574	1.2784	-2.35524	1.22316e-15	EGP09099	down
EGP04469	4.8026	5.2236	5.9508	11.5294	13.2192	10.2567	1.09493	1.25214e-15	EGP04469	up
EGP25580	4.7314	3.6484	3.8091	8.5651	9.0625	11.4745	1.21145	1.32848e-15	EGP25580	up
EGP28416	5.5339	5.6233	4.1579	13.2902	11.6327	10.6076	1.17159	1.39656e-15	EGP28416	up
EGP26517	3.5063	3.2585	3.7277	0.7098	0.9883	0.599	-2.22365	1.39935e-15	EGP26517	down
EGP04541	0.0947	0.1456	0.0598	1.9058	1.0069	1.637	3.87112	1.41922e-15	EGP04541	up
EGP26660	77.8688	77.1879	69.5441	27.234	42.462	37.0163	-1.11312	1.4335e-15	EGP26660	down
EGP26198	0.5113	0.8014	0.6292	2.4594	2.4215	2.3429	1.86199	1.49566e-15	EGP26198	up
novel.2203	2.982	3.4056	2.2894	0.2742	0.3273	0.475	-3.06017	1.58299e-15	--	down
EGP12652	0.8749	1.0091	1.0637	2.9624	2.5079	2.3912	1.3795	1.60065e-15	EGP12652	up
EGP07445	4.3251	5.2194	5.4123	12.819	11.9248	13.7136	1.32629	1.79524e-15	EGP07445	up
EGP15597	18.3945	18.0648	21.1632	6.4597	9.4292	6.8283	-1.37934	1.89095e-15	EGP15597	down
EGP30296	40.1105	50.1576	58.1148	21.6865	27.3764	21.3773	-1.11418	2.20793e-15	EGP30296	down
EGP12070	40.4066	41.1798	30.1604	13.8652	16.2019	19.1724	-1.22421	2.22994e-15	EGP12070	down
novel.607	1.8896	2.4662	1.9889	5.3057	5.1769	6.111	1.34769	2.52663e-15	--	up
novel.2160	1.7389	2.628	2.0449	9.421	9.6657	8.3181	2.06252	2.52906e-15	--	up
EGP02557	0.0773	0.104	0.0488	1.3893	1.658	0.7565	4.00038	2.67383e-15	EGP02557	up
EGP05946	8.6675	7.9085	7.7609	1.6358	3.2564	2.1887	-1.81761	2.97408e-15	EGP05946	down
novel.1332	0	0	0	1.979	1.6482	1.885	9.48269	3.01741e-15	--	up
EGP06631	9.3311	9.9259	9.9194	4.5239	5.7741	4.4287	-1.02391	3.02688e-15	EGP06631	down
EGP32406	0	0	0	7.8556	7.7362	8.571	9.47511	3.04205e-15	EGP32406	up
EGP05005	9.4762	9.3826	8.1758	3.2478	3.2966	4.2635	-1.36726	3.29418e-15	EGP05005	down
novel.1877	5.8459	4.5168	4.8747	0.2662	0.0635	0.7093	-3.95379	3.40396e-15	--	down
novel.54	0.1446	0.1374	0.2471	1.1071	1.4569	0.8823	2.68088	3.5893e-15	--	up
EGP24051	10.7211	13.1191	11.3748	5.2916	5.5778	6.4314	-1.06606	3.65289e-15	EGP24051	down
EGP13436	2.9846	2.3553	2.7777	5.8133	6.2205	5.3619	1.05851	3.8975e-15	EGP13436	up
EGP01163	8.3879	6.4856	8.9372	2.8571	2.9375	3.3674	-1.41984	4.0498e-15	EGP01163	down
EGP09430	4.9659	4.388	4.4512	12.0677	11.88	11.0109	1.29802	4.48242e-15	EGP09430	up
novel.1650	0	0	0	2.1542	2.4529	2.9702	9.44765	4.53336e-15	--	up
novel.1293	0	0	0	1.5121	2.0895	1.5127	9.45889	4.62866e-15	--	up
EGP05271	10.6464	10.1699	6.5998	21.8644	25.6636	22.203	1.30367	4.87488e-15	EGP05271	up
EGP20818	9.9666	13.0931	12.0662	4.2671	5.8794	4.0055	-1.34769	5.0682e-15	EGP20818	down
EGP09894	0.065	0.15	0.219	1.6771	1.6982	2.1126	3.6636	5.21813e-15	EGP09894	up
EGP18881	16.4731	12.8666	8.5512	2.7317	3.8047	4.2819	-1.85066	5.52795e-15	EGP18881	down
EGP28165	1.8614	2.1071	2.7864	6.5879	11.6017	6.2321	1.81838	5.62801e-15	EGP28165	up
EGP00076	15.5877	15.6917	16.5365	5.3708	7.0027	3.375	-1.63726	5.91024e-15	EGP00076	down
EGP11179	4.9639	5.7253	5.1478	0.4901	1.0529	0.8489	-2.76287	6.36255e-15	EGP11179	down
novel.2017	1.7914	2.672	1.5481	0.4738	0.3317	0.2525	-2.54248	7.04686e-15	--	down
EGP08711	4.5028	4.7112	4.1233	9.2016	8.515	10.9937	1.06346	7.31954e-15	EGP08711	up
EGP23873	0.8836	1.0583	0.6868	3.0682	2.4854	2.7465	1.61456	7.82334e-15	EGP23873	up
novel.418	1.4538	1.1977	0.7214	6.6359	7.7885	5.5157	2.50724	7.83871e-15	--	up
novel.2271	11.4714	7.5132	13.092	4.1072	3.3709	3.7377	-1.55759	8.05836e-15	--	down
EGP11464	0.5134	0.5573	0.6103	3.5411	2.7384	3.7366	2.53838	8.12911e-15	EGP11464	up
EGP33670	0.6935	0.5714	0.2503	3.0785	2.9392	3.2504	2.54727	8.53092e-15	EGP33670	up
EGP16714	5.7793	6.9856	4.6134	2.0239	2.4498	2.0609	-1.45008	8.72074e-15	EGP16714	down
EGP06849	4.2079	5.4155	3.0463	10.8603	11.9771	12.602	1.44143	8.82823e-15	EGP06849	up
EGP09831	54.6853	42.1423	46.7065	18.1805	27.2955	18.064	-1.21457	9.18765e-15	EGP09831	down
EGP06995	0.8655	1.1434	1.0931	3.1181	3.1707	4.1298	1.71165	9.23284e-15	EGP06995	up
EGP27427	8.7783	9.2963	10.3317	19.5094	18.6708	20.9943	1.02066	1.01425e-14	EGP27427	up
novel.1373	1.3453	1.2225	1.7249	5.1384	3.9474	6.0374	1.7786	1.02358e-14	--	up
EGP10405	4.102	4.1398	6.2174	15.872	22.0413	19.9936	1.97159	1.05418e-14	EGP10405	up
EGP08956	25.0611	26.7307	18.8219	9.283	12.7277	9.7458	-1.19162	1.06219e-14	EGP08956	down
novel.1361	7.675	6.6848	5.3189	18.0512	15.688	13.525	1.22096	1.07982e-14	--	up
EGP32417	17.6895	18.8712	18.2492	8.9283	6.6881	9.5166	-1.16788	1.12419e-14	EGP32417	down
EGP19302	9.9754	8.4372	10.1497	21.6382	21.3409	20.986	1.12283	1.16672e-14	EGP19302	up
EGP16582	6.3289	5.8048	6.5478	14.9174	11.9691	12.3368	1.02988	1.33555e-14	EGP16582	up
EGP00041	8.7837	5.7858	7.3539	2.9527	2.7288	2.6185	-1.44308	1.38429e-14	EGP00041	down
EGP31496	5.4375	5.7156	6.3257	2.8611	3.4228	2.5601	-1.02019	1.51588e-14	EGP31496	down
EGP02938	1.6054	1.0083	1.1845	3.4852	4.6263	4.7676	1.71414	1.65841e-14	EGP02938	up
EGP12517	7.2229	6.614	5.8608	1.6938	1.6661	0.7112	-2.30626	1.7198e-14	EGP12517	down
EGP34397	0.4504	1.3421	0.6163	6.3376	7.7734	4.1751	2.89586	1.83927e-14	EGP34397	up
novel.2134	5.1521	5.8371	6.5075	0	0	0	-9.24223	1.84001e-14	--	down
EGP13221	1.0366	1.3489	1.0743	3.3658	3.3622	3.0229	1.45743	2.00332e-14	EGP13221	up
EGP02631	2.7738	2.8699	5.4099	0.837	0.548	0.4333	-2.64004	2.08854e-14	EGP02631	down
novel.187	0.0984	0.0284	0.3418	7.0388	10.9064	7.2258	5.73359	2.14223e-14	--	up
EGP20002	1.1419	1.3171	1.3429	5.6327	6.7882	4.6259	2.13186	2.29459e-14	EGP20002	up
EGP25883	14.7926	16.5207	12.5526	5.6797	6.0873	8.5146	-1.15453	2.33909e-14	EGP25883	down
EGP12760	0.718	0.7246	0.8162	3.1569	2.7125	2.5573	1.86318	2.3676e-14	EGP12760	up
novel.1815	11.3091	8.5074	9.6987	5.3716	4.0479	4.2131	-1.15608	2.53015e-14	--	down
EGP02984	0.0338	0.0585	0.1495	1.1895	1.3059	1.3946	4.02791	2.59672e-14	EGP02984	up
EGP09079	3.5227	4.063	2.4037	0.1424	0.0907	0.0506	-5.16827	2.59876e-14	EGP09079	down
EGP12316	1.1384	0.889	0.9885	0.0139	0.0531	0	-5.47911	2.60294e-14	EGP12316	down
EGP14277	0.855	0.9314	1	3.7317	3.3323	2.5725	1.75514	2.71402e-14	EGP14277	up
novel.1300	1.7265	2.4275	1.6407	5.9188	4.6569	6.165	1.48956	2.83046e-14	--	up
EGP07476	3.4113	4.8525	2.5134	15.7991	14.3837	11.0846	1.89553	3.35669e-14	EGP07476	up
EGP05992	5.8502	8.4256	6.1641	2.1325	2.3413	2.1593	-1.66151	3.62324e-14	EGP05992	down
EGP05826	26.6842	32.5745	21.9706	10.0881	10.8876	12.4669	-1.32201	3.70062e-14	EGP05826	down
EGP02591	1.1405	1.0091	0.9472	4.9278	3.8827	2.7727	1.86086	3.77824e-14	EGP02591	up
EGP10163	8.4952	7.7041	6.9658	3.173	2.7992	2.3974	-1.50894	3.81856e-14	EGP10163	down
EGP20812	2.4448	1.2572	2.2028	0	0	0	-9.22871	4.31886e-14	EGP20812	down
EGP07071	0.5045	0.5589	0.5198	1.401	1.4936	1.4684	1.42367	4.88428e-14	EGP07071	up
EGP24258	1.1544	0.928	0.9868	3.2678	2.676	2.7252	1.45349	5.01893e-14	EGP24258	up
EGP12983	4.4459	3.6004	6.4519	24.29	15.3543	20.4522	2.01643	5.30955e-14	EGP12983	up
novel.1528	0.373	0	0.1178	13.4491	7.9338	5.9439	5.67432	5.31975e-14	--	up
EGP15874	0.2893	0.429	0.261	2.2049	1.8043	2.1436	2.61012	5.8479e-14	EGP15874	up
EGP30372	3.9943	3.9488	3.2089	1.577	1.095	1.4942	-1.4652	6.10775e-14	EGP30372	down
EGP11610	4.1203	3.817	5.1212	9.5338	10.6478	9.4498	1.14575	6.18189e-14	EGP11610	up
EGP30625	23.1219	18.6875	18.3448	11.0452	9.2797	9.5039	-1.05417	6.35218e-14	EGP30625	down
EGP06773	0.0213	0.0737	0.0269	2.1985	1.5026	1.6243	5.42641	6.56635e-14	EGP06773	up
EGP26526	6.504	5.7833	7.3918	2.1677	1.608	3.125	-1.55682	6.75475e-14	EGP26526	down
EGP31785	6.1502	5.7811	5.4959	2.7402	2.7883	3.0745	-1.06112	7.1187e-14	EGP31785	down
EGP00474	3.7282	3.3668	3.2261	8.0544	6.4999	7.8514	1.07437	7.48231e-14	EGP00474	up
novel.1853	0.0395	0.0228	0	2.3414	2.1468	2.0014	6.5647	7.65449e-14	--	up
EGP06582	6.4179	6.3418	4.5313	1.9447	1.5136	2.4558	-1.59375	7.7545e-14	EGP06582	down
EGP02511	1.1315	0.7341	0.8932	6.9236	3.404	6.0098	2.51608	8.17599e-14	EGP02511	up
EGP28383	2.0098	2.0982	1.882	4.9974	4.7324	6.7774	1.41926	8.27244e-14	EGP28383	up
EGP28758	0.3448	0.5507	0.8376	13.0007	5.3746	14.7192	4.22094	8.7343e-14	EGP28758	up
EGP14053	0.1083	0.1071	0.0586	1.4517	1.1261	0.9671	3.63381	8.74444e-14	EGP14053	up
EGP07609	3.1046	2.9406	2.3659	7.0566	6.1547	6.3294	1.17118	9.30131e-14	EGP07609	up
EGP00669	1.171	1.8071	1.3957	5.2792	3.8401	4.4109	1.59251	9.37453e-14	EGP00669	up
EGP28290	2.4022	3.1469	2.3224	0.0348	0.0996	0	-5.85909	9.89578e-14	EGP28290	down
EGP21347	104.959	109.255	95.9817	12.8535	27.8109	18.3597	-2.43235	1.01344e-13	EGP21347	down
EGP24601	9.9775	6.2807	5.8352	22.0794	17.3633	18.1775	1.33937	1.0869e-13	EGP24601	up
EGP11626	5.186	5.7895	5.3593	1.6909	1.6454	2.2875	-1.5825	1.20177e-13	EGP11626	down
EGP31709	7.21	6.1292	6.4581	2.5934	1.6078	2.513	-1.60596	1.20917e-13	EGP31709	down
novel.1053	8.5679	9.3619	7.262	2.7098	2.2716	2.1838	-1.85442	1.21422e-13	--	down
EGP12504	8.9268	7.2959	8.5418	3.3181	3.89	2.3145	-1.41547	1.25179e-13	EGP12504	down
EGP19467	0.0466	0	0	6.2965	4.0829	14.0433	8.87586	1.25846e-13	EGP19467	up
EGP32657	3.1548	3.7892	3.2977	7.6787	7.3311	7.7496	1.11303	1.34237e-13	EGP32657	up
EGP31143	103.37	97.0944	62.6251	193.594	173.771	201.125	1.07155	1.4354e-13	EGP31143	up
novel.1801	13.5805	10.956	10.0955	21.1362	23.7963	27.2349	1.01591	1.43732e-13	--	up
novel.2110	4.634	3.5215	4.1109	8.868	9.6463	7.9221	1.06631	1.52042e-13	--	up
novel.2443	1.3785	1.6448	4.4431	0.1115	0.0266	0.0297	-5.51314	1.53535e-13	--	down
EGP32676	28.8318	29.4827	25.2476	10.194	13.0598	14.116	-1.20297	1.65043e-13	EGP32676	down
EGP29872	3.0501	3.7753	2.1612	9.2024	8.7441	9.2509	1.55274	1.70788e-13	EGP29872	up
EGP27919	13.0144	10.8899	11.4959	37.7002	31.3275	25.1947	1.37077	1.76991e-13	EGP27919	up
EGP25591	0	0.0096	0	1.6433	1.5689	1.4805	8.81079	1.82763e-13	EGP25591	up
EGP21024	4.4657	6.1277	5.1945	1.4694	2.1537	2.1177	-1.49814	1.89912e-13	EGP21024	down
EGP01400	8.8881	7.7359	6.4967	17.1278	16.5826	17.5877	1.10372	1.91831e-13	EGP01400	up
EGP30693	1.9971	2.3164	1.7856	0.6972	0.7159	0.6029	-1.63535	1.94618e-13	EGP30693	down
EGP13079	26.6026	33.8048	33.7581	63.9892	89.1652	58.2892	1.12865	1.99744e-13	EGP13079	up
EGP01212	3.9581	3.0886	3.5969	1.1794	0.6142	1.3224	-1.81974	2.00127e-13	EGP01212	down
novel.1592	6.3369	6.5892	6.6029	3.0403	2.3128	3.5699	-1.17363	2.03097e-13	--	down
EGP21890	0	0	0	2.3793	1.5832	2.6129	8.95939	2.06715e-13	EGP21890	up
EGP05633	1.4355	1.5312	1.336	3.1384	3.7213	3.2913	1.19813	2.11836e-13	EGP05633	up
novel.337	0	0.0444	0	3.2484	2.7998	3.0777	7.67417	2.19531e-13	--	up
EGP21727	4.0372	5.333	2.7893	11.1262	11.7813	13.1961	1.52655	2.34223e-13	EGP21727	up
novel.2325	0.3875	0.2235	0.3535	1.9185	1.8558	2.4485	2.64144	2.36451e-13	--	up
EGP33821	0.6994	0.9179	0.6397	2.7428	4.1575	3.2852	2.13519	2.45933e-13	EGP33821	up
EGP01102	33.9163	35.6835	28.7012	13.2615	20.2151	15.987	-1.02978	2.47379e-13	EGP01102	down
EGP23939	4.3119	4.4385	3.6601	8.1001	11.1589	10.8646	1.23747	2.52766e-13	EGP23939	up
EGP33762	125.133	132.703	128.184	28.378	47.4742	29.1186	-1.91765	2.62952e-13	EGP33762	down
novel.518	3.5958	3.5506	3.97	1.8351	1.3756	1.5034	-1.2778	2.7648e-13	--	down
EGP24656	0.388	0.3938	0.2744	2.5841	1.3204	2.4052	2.52848	2.84916e-13	EGP24656	up
novel.1206	0	0	0.0596	9.4559	7.3912	8.3696	8.73652	3.29554e-13	--	up
EGP16602	0.5671	0.4757	0.4884	3.355	2.3951	2.5129	2.38628	3.36631e-13	EGP16602	up
EGP02878	0.6455	0.9572	1.0482	6.487	10.8383	6.7992	3.16567	3.66658e-13	EGP02878	up
EGP14253	1.7184	1.9042	2.213	4.5432	4.9788	4.7583	1.25663	3.76827e-13	EGP14253	up
EGP12252	0.1366	0.1575	0.0575	3.4701	2.7523	3.0728	4.656	3.91127e-13	EGP12252	up
EGP30355	0.1017	0.0704	0.2056	1.479	1.6626	1.2968	3.54512	3.94976e-13	EGP30355	up
EGP31105	15.3621	19.9192	17.3546	42.961	37.3844	36.7286	1.11596	4.03421e-13	EGP31105	up
EGP33545	4.1634	4.3247	3.548	10.1604	11.5675	7.2564	1.22853	4.2827e-13	EGP33545	up
EGP09253	197.807	191.365	214.769	52.8509	87.4937	71.5827	-1.55075	4.50024e-13	EGP09253	down
novel.1070	0.1936	0.2748	0.1504	1.222	1.5667	1.2839	2.67591	4.84308e-13	--	up
EGP09051	3.7859	3.8208	4.5428	7.9016	8.3914	8.8007	1.00896	5.45913e-13	EGP09051	up
EGP20714	3.5303	3.526	2.5513	1.0455	0.6722	1.0461	-1.84443	5.60478e-13	EGP20714	down
EGP21127	1.3672	1.2979	1.3948	3.6255	3.1552	5.6782	1.57489	6.10536e-13	EGP21127	up
EGP30273	23.8153	25.1242	25.1525	12.58	10.5547	8.6345	-1.25916	6.11554e-13	EGP30273	down
EGP13042	3.4297	3.7231	4.0772	10.1324	19.4226	10.4638	1.79751	6.26034e-13	EGP13042	up
EGP23621	0.1149	0	0.0622	7.3309	9.7729	3.1789	6.7772	6.56038e-13	EGP23621	up
novel.831	0	0	0	1.4328	1.6995	2.0362	8.76028	6.65157e-13	--	up
EGP06934	12.6611	13.4266	10.3058	29.2782	21.811	25.8448	1.03743	6.9171e-13	EGP06934	up
EGP12842	11.4259	12.7508	8.685	2.2932	2.1663	4.8628	-1.86252	6.96661e-13	EGP12842	down
EGP19614	0.0149	0	0.0188	2.2921	2.5224	1.7344	7.5655	6.97616e-13	EGP19614	up
EGP31015	0.4316	0.8146	0.3965	2.5763	6.2808	5.4429	3.08479	7.00198e-13	EGP31015	up
novel.1276	2.1102	2.4014	2.381	0.3959	0.4094	0.211	-2.7897	7.03833e-13	--	down
EGP14325	0.7172	1.3978	0.781	3.7119	6.2848	4.0183	2.24091	7.47951e-13	EGP14325	up
EGP08717	3.8044	3.7286	3.9089	1.5948	1.2798	0.9361	-1.62257	7.52484e-13	EGP08717	down
novel.1077	0	0	0	7.3243	9.1016	10.9048	8.742	8.00716e-13	--	up
EGP25937	5.7065	7.1907	3.7706	12.858	15.5267	15.5832	1.35802	8.03547e-13	EGP25937	up
novel.155	10.0493	7.107	10.8648	3.2003	2.6851	3.4112	-1.63486	8.22171e-13	--	down
EGP29539	1.6475	0.8605	0.3141	5.1026	7.4814	6.4489	2.69099	8.75976e-13	EGP29539	up
EGP23937	11.133	11.944	8.9221	3.967	5.6299	4.5141	-1.22018	9.55331e-13	EGP23937	down
novel.1630	1.3793	1.1059	1.4341	0	0.0094	0	-8.56271	1.08221e-12	--	down
EGP12487	1.6492	1.2983	1.1903	3.361	4.1759	3.4843	1.36779	1.0823e-12	EGP12487	up
EGP00885	6.0052	4.8322	4.2335	2.1755	1.742	1.6706	-1.47385	1.12391e-12	EGP00885	down
EGP13867	9.8819	12.9946	6.4793	53.8008	40.4085	40.9835	2.16347	1.14775e-12	EGP13867	up
EGP01007	1.9017	1.7522	1.6841	3.4728	4.0741	4.3162	1.10914	1.24227e-12	EGP01007	up
EGP01516	2.2849	2.4401	2.3871	0	0	0	-8.6375	1.26417e-12	EGP01516	down
EGP06529	13.6216	9.3101	17.205	1.6267	2.8238	2.0492	-2.66123	1.3367e-12	EGP06529	down
EGP29636	2.485	2.1585	1.4337	6.1872	6.3878	9.7388	1.82605	1.45093e-12	EGP29636	up
EGP29671	0.2655	0.212	0.1032	2.0831	2.2174	1.174	3.17385	1.6583e-12	EGP29671	up
novel.1704	0.1857	0.153	0.4021	2.0838	1.8113	2.4532	3.08527	1.67039e-12	--	up
EGP21765	2.5687	2.3929	2.2961	6.1163	5.4855	5.2599	1.17386	1.72196e-12	EGP21765	up
EGP14298	5.5558	4.9258	3.7235	12.7182	11.5078	11.1472	1.26953	1.79324e-12	EGP14298	up
EGP28691	8.2008	7.5269	7.1486	17.4029	13.4795	19.8125	1.10427	1.90313e-12	EGP28691	up
novel.1870	3.9005	3.1145	3.3566	0	0	0	-8.58038	2.06021e-12	--	down
EGP25835	10.7511	12.1933	9.7319	22.1802	19.0269	27.5125	1.03047	2.07315e-12	EGP25835	up
EGP18281	3.9832	3.8656	3.657	9.0528	7.1697	7.6097	1.00864	2.21942e-12	EGP18281	up
novel.448	6.6409	8.483	5.6821	20.8478	17.6658	17.4023	1.38487	2.22591e-12	--	up
novel.1101	0	0	0	0.7659	0.5773	0.7734	8.5788	2.28979e-12	--	up
novel.1944	3.4155	2.9264	4.0675	0.7247	0.3277	0.8537	-2.50069	2.41701e-12	--	down
EGP13540	2.1054	2.0141	2.1744	4.1822	4.4365	4.3648	1.00511	2.86269e-12	EGP13540	up
EGP21858	8.4072	7.9297	7.8344	3.023	2.8443	3.8292	-1.36269	3.01588e-12	EGP21858	down
EGP18133	0.7384	0.4931	0.1473	3.2355	3.3935	5.6344	3.07518	3.03987e-12	EGP18133	up
EGP26196	2.5062	2.7988	1.8089	5.7139	5.945	6.0903	1.27436	3.22474e-12	EGP26196	up
EGP06102	2.9555	2.2448	2.2459	7.0434	6.7783	13.5134	1.83016	3.41291e-12	EGP06102	up
EGP19187	5.4752	5.532	6.7155	11.4865	13.9043	11.3385	1.01485	3.56722e-12	EGP19187	up
EGP10081	11.651	14.4192	5.9799	82.4865	59.2503	63.0979	2.63645	3.76624e-12	EGP10081	up
EGP06206	248.003	245.853	301.907	55.7471	99.1347	71.4392	-1.85386	3.84841e-12	EGP06206	down
novel.1915	3.7559	3.4957	4.5425	1.8024	1.2662	1.6311	-1.36887	3.89042e-12	--	down
EGP31351	3.5091	5.1651	3.7569	12.5394	9.5773	18.2523	1.65829	3.93491e-12	EGP31351	up
EGP27945	209.829	247.048	333.266	705.46	896.816	843.106	1.58884	3.94093e-12	EGP27945	up
novel.775	0.68	0.5519	0.3181	2.3625	2.5939	3.7458	2.42856	3.98021e-12	--	up
novel.993	0.7848	0.8455	0.6645	1.9719	1.8053	2.1664	1.32866	4.11274e-12	--	up
EGP28619	3.3585	3.6899	3.2363	1.5955	1.2478	1.5197	-1.2795	4.1242e-12	EGP28619	down
EGP28487	0.4761	0.2942	0.2577	1.4953	1.8273	2.5925	2.46464	4.62161e-12	EGP28487	up
EGP06377	6.4279	8.2375	6.1507	1.751	1.7444	1.3795	-2.13042	4.6489e-12	EGP06377	down
EGP07161	0.5456	0.6293	0.0766	4.0517	5.8363	4.0156	3.40101	4.90553e-12	EGP07161	up
EGP24326	5.4422	7.6803	6.5665	2.7755	2.9718	2.3225	-1.32257	5.10324e-12	EGP24326	down
EGP28769	3.4626	3.556	3.415	8.7874	6.77	7.914	1.12836	5.12233e-12	EGP28769	up
EGP26866	8.8325	9.781	9.753	4.4793	4.5191	5.2823	-1.03092	5.60822e-12	EGP26866	down
EGP13547	5.6361	6.4649	4.3808	13.3622	17.7492	11.7269	1.33809	5.88849e-12	EGP13547	up
novel.1841	10.9545	8.6247	9.445	4.7236	2.9035	2.345	-1.58105	5.91671e-12	--	down
EGP32116	6.4999	6.5536	5.3496	2.0651	1.2909	2.7777	-1.63222	5.96662e-12	EGP32116	down
novel.2130	5.1112	6.8777	8.1467	1.855	1.0217	0.9125	-2.44487	6.47805e-12	--	down
EGP16873	0.0574	0.1986	0.2175	2.2546	1.3815	2.439	3.68078	6.75192e-12	EGP16873	up
EGP07248	1.1378	0.8234	1.1131	2.5505	2.6224	2.7464	1.32284	6.76118e-12	EGP07248	up
EGP24525	0.5887	0.6495	0.5173	1.8459	1.9629	1.8075	1.63576	6.95233e-12	EGP24525	up
EGP18377	4.5454	3.3176	3.7676	10.7424	9.5405	8.8317	1.27942	7.1345e-12	EGP18377	up
EGP26904	8.491	7.9852	8.4147	22.6685	23.5432	37.0594	1.69897	7.41753e-12	EGP26904	up
EGP22509	2.0322	2.8648	2.5057	5.4843	7.5651	5.6238	1.29965	7.78108e-12	EGP22509	up
EGP10581	7.194	5.1742	6.9681	2.7011	1.6287	2.7023	-1.50428	7.84599e-12	EGP10581	down
EGP06612	0.4802	0.5846	0.3032	2.471	2.2994	2.5338	2.36597	7.99118e-12	EGP06612	up
EGP03077	2.0225	1.504	1.731	3.6819	4.2898	4.5897	1.21213	8.04338e-12	EGP03077	up
novel.2093	3.1261	3.3324	3.4101	0	0	0	-8.36205	8.66107e-12	--	down
EGP02877	0.6245	0.926	0.5634	5.6485	7.0904	5.5746	3.07658	9.04823e-12	EGP02877	up
EGP25898	0.1004	0.0695	0	1.4121	1.1235	1.1289	4.31595	9.1724e-12	EGP25898	up
EGP06065	0.6669	0.9144	1.351	2.8771	3.0145	3.8373	1.69915	9.61833e-12	EGP06065	up
EGP06871	4.6023	3.0724	4.9683	1.7544	1.5354	1.785	-1.35895	9.78257e-12	EGP06871	down
EGP04116	813.839	816.536	851.862	210.044	365.698	292.508	-1.55512	9.81981e-12	EGP04116	down
EGP06555	0.1231	0.284	0.1383	1.123	1.3172	1.0944	2.6648	1.01775e-11	EGP06555	up
EGP14377	76.0618	78.5797	56.9749	27.899	43.4504	33.6846	-1.04933	1.03637e-11	EGP14377	down
EGP20751	3.6368	3.4205	3.5684	1.6471	1.6075	1.2875	-1.26394	1.10014e-11	EGP20751	down
EGP32103	0	0	0	1.7468	1.3987	1.8618	8.33789	1.17371e-11	EGP32103	up
novel.1383	0.3972	0.6872	0.3763	4.9484	3.6128	3.0406	2.95282	1.18708e-11	--	up
EGP31114	0.1438	0.2321	0	1.4158	2.4781	2.0121	3.89974	1.53833e-11	EGP31114	up
EGP16121	4.3325	4.7916	6.7465	2.0644	2.0817	1.7801	-1.45741	1.55754e-11	EGP16121	down
EGP03415	2.7727	2.3134	2.5335	9.269	7.0663	9.511	1.71698	1.5882e-11	EGP03415	up
novel.2145	0	0.0165	0	2.2032	1.6378	1.3803	8.18327	1.61501e-11	--	up
EGP29638	8.3125	8.9325	9.543	2.7927	4.4496	4.7311	-1.20203	1.77401e-11	EGP29638	down
EGP28666	11.034	9.7163	9.3104	4.1336	4.3564	2.6893	-1.46371	1.84131e-11	EGP28666	down
EGP26062	0.4969	0.3343	0.2092	1.6993	1.9468	2.277	2.44344	1.89615e-11	EGP26062	up
novel.1817	30.7137	18.9535	22.1488	56.8194	45.4898	58.8569	1.12244	1.93404e-11	--	up
EGP24576	0.9494	0.5664	0.9511	2.8406	3.0785	2.414	1.71556	1.98457e-11	EGP24576	up
EGP10568	0.412	0.4056	0.5077	1.4727	1.3611	1.394	1.63859	1.99309e-11	EGP10568	up
EGP09492	1.1261	1.1979	1.0771	3.0124	2.3253	3.0196	1.25462	2.24179e-11	EGP09492	up
EGP10253	0.3183	0.4227	0.3655	1.1761	1.2093	1.4586	1.75956	2.24928e-11	EGP10253	up
EGP30362	0	0	0	2.107	2.996	2.3891	8.2524	2.28617e-11	EGP30362	up
EGP15726	4.8205	4.6088	2.9642	0	0	0	-8.2729	2.31456e-11	EGP15726	down
novel.1863	0	0	0	3.2005	3.4223	3.8207	8.21545	2.50554e-11	--	up
EGP27988	0.8508	0.6542	1.1297	3.4275	3.8828	2.6173	1.88141	2.58891e-11	EGP27988	up
novel.2040	0.0248	0.0572	0.094	1.338	1.3885	1.4881	4.59841	2.74878e-11	--	up
EGP13950	15.5222	12.0237	10.2597	6.1695	5.0434	5.5485	-1.21699	2.92664e-11	EGP13950	down
EGP28940	11.0322	8.0724	10.1887	28.2355	19.1223	24.0173	1.24157	2.98991e-11	EGP28940	up
EGP31398	3.0284	2.882	2.3328	0.828	1.2314	1.0014	-1.46909	3.26368e-11	EGP31398	down
EGP31016	0.0861	0.0828	0.1631	0.774	1.012	1.094	3.09972	3.35594e-11	EGP31016	up
EGP22444	0	0	0	2.0969	1.493	2.1214	8.19225	3.46967e-11	EGP22444	up
EGP33617	1.9618	1.5887	1.8628	3.6705	5.1709	4.2949	1.23852	3.49801e-11	EGP33617	up
EGP34088	0	0	0	2.4721	2.0919	5.8088	8.38996	3.81595e-11	EGP34088	up
EGP21300	6.8308	4.1907	2.5241	13.8884	15.8627	16.3927	1.71999	3.95956e-11	EGP21300	up
novel.1855	1.8512	2.4693	2.6838	5.2848	6.8655	5.13	1.26946	3.96841e-11	--	up
EGP00915	4.4555	4.7947	5.5522	9.8885	14.2725	9.7694	1.16028	4.0031e-11	EGP00915	up
EGP31804	2.4783	2.217	1.6796	0.7796	0.3519	0.6346	-1.89884	4.16147e-11	EGP31804	down
EGP22182	0.3259	0.3645	0.3867	1.2507	1.183	1.1973	1.71792	4.35005e-11	EGP22182	up
EGP09351	6.0393	6.0048	3.8704	11.4764	11.3565	10.6152	1.02889	4.63357e-11	EGP09351	up
EGP25859	7.5926	7.242	9.2913	14.4472	21.0279	16.7781	1.07724	4.71151e-11	EGP25859	up
EGP02166	1.918	2.009	2.1012	0.6425	0.4382	0.5136	-1.95966	4.7305e-11	EGP02166	down
EGP31232	6.1446	5.4735	5.2337	9.4055	12.6865	14.9824	1.09524	5.0283e-11	EGP31232	up
EGP25915	2.4787	2.3573	2.197	0.102	0.2434	0.0543	-4.14831	5.03548e-11	EGP25915	down
EGP00220	3.5911	3.0971	2.4314	6.1263	7.0079	6.6917	1.07494	5.03796e-11	EGP00220	up
EGP00718	1.6029	1.9411	2.9609	0.0235	0	0	-8.03818	5.1164e-11	EGP00718	down
EGP28606	0.8696	1.2656	0.7322	3.3257	3.0361	3.0532	1.67393	5.60845e-11	EGP28606	up
novel.1873	2.8401	2.9183	1.924	0.6357	0.4624	0.6453	-2.18685	5.82076e-11	--	down
EGP30385	18.316	9.5039	9.3275	125.7	177.292	69.0372	3.28581	6.04142e-11	EGP30385	up
EGP10981	8.3045	11.9943	8.6937	18.9919	19.7652	23.5624	1.06444	6.28007e-11	EGP10981	up
EGP10093	1.9519	0.9524	0.8534	5.4134	4.7061	6.7552	2.10583	6.34521e-11	EGP10093	up
EGP15709	0.7791	1.0859	1.0661	11.3814	35.8327	9.778	4.24618	6.45426e-11	EGP15709	up
EGP13970	4.3627	1.6392	1.6281	29.4909	26.0468	19.4551	3.25308	6.49043e-11	EGP13970	up
EGP10948	2.1268	2.0797	1.8687	6.3968	6.8836	5.7782	1.60756	6.51725e-11	EGP10948	up
novel.1931	2.2434	2.5485	2.4634	1.15	1.0727	0.8735	-1.26495	7.02333e-11	--	down
novel.2011	2.8373	2.9944	3.4315	1.3615	1.631	1.2459	-1.1636	7.17486e-11	--	down
EGP11225	1.8691	1.6912	1.4043	0.4345	0.3247	0.5034	-2.02438	7.26375e-11	EGP11225	down
EGP09432	3.5876	2.8338	3.3779	6.8834	6.523	7.826	1.07211	7.67762e-11	EGP09432	up
novel.546	0	0	0	4.4219	3.0053	3.5948	8.06537	8.159e-11	--	up
novel.109	0	0	0.0727	6.1406	5.476	5.3224	7.87617	8.34314e-11	--	up
novel.1520	0.1665	0.072	0.2365	1.4883	1.5141	1.1182	3.08942	8.37526e-11	--	up
EGP03218	1.7207	1.9521	1.4964	4.9942	4.2945	5.1118	1.43448	9.47183e-11	EGP03218	up
novel.1769	0.4887	0.3221	0.2646	2.0875	2.4228	3.0539	2.75065	9.47735e-11	--	up
EGP24248	3.8253	3.481	3.8343	0.9259	0.4321	1.4693	-2.02858	9.78875e-11	EGP24248	down
EGP31950	1.6011	1.4518	1.8061	3.4713	3.1451	3.398	1.00445	9.87224e-11	EGP31950	up
novel.1529	1.2611	0.9235	1.2262	3.3446	2.4089	2.7894	1.28204	1.02747e-10	--	up
novel.137	2.7591	3.2188	2.804	0	0.0355	0	-7.81091	1.24292e-10	--	down
EGP01201	2.8991	1.7213	3.3367	25.4436	66.3843	21.2028	3.78965	1.28845e-10	EGP01201	up
novel.326	1.9294	2.1704	2.0458	0.6144	0.3466	0.387	-2.2287	1.29055e-10	--	down
EGP32182	384.119	339.356	368.268	86.8284	157.105	113.226	-1.65138	1.34233e-10	EGP32182	down
EGP24362	0	0	0	1.2857	0.9269	1.4823	8.00103	1.37025e-10	EGP24362	up
EGP29725	0.5872	0.4233	0.3708	1.6997	2.4238	1.8346	2.05769	1.38416e-10	EGP29725	up
novel.864	0.33	0.4758	0.2084	4.6433	3.9713	4.5368	3.64528	1.39819e-10	--	up
EGP10076	8.7798	8.9063	7.8294	2.6294	4.8076	3.2786	-1.28903	1.46632e-10	EGP10076	down
novel.808	0.9731	0.5612	0.4727	2.4623	1.8481	1.6995	1.53604	1.47725e-10	--	up
EGP06044	12.5121	13.4003	12.8562	5.0649	6.6697	6.5155	-1.12657	1.48082e-10	EGP06044	down
EGP18393	1.0886	0.9549	0.8715	2.7685	2.5231	2.5294	1.37812	1.50289e-10	EGP18393	up
EGP00017	1.2636	1.0464	0.8594	3.837	3.3006	4.8187	1.86308	1.63166e-10	EGP00017	up
novel.2303	2.7475	3.4623	1.9279	0	0	0	-7.98236	1.73717e-10	--	down
EGP22706	2.1484	2.0782	1.9549	5.6068	5.1203	4.3595	1.24629	1.74926e-10	EGP22706	up
EGP26805	61.3373	54.8628	64.8365	238.714	412.097	199.833	2.19324	1.77127e-10	EGP26805	up
novel.2210	0	0	0	2.0941	4.6347	1.1668	8.24572	1.83714e-10	--	up
EGP04471	1.8769	2.0917	1.2785	0.3214	0.2833	0.4217	-2.40264	1.95223e-10	EGP04471	down
novel.2355	1.9691	1.4835	1.6246	0.5586	0.4444	0.3175	-1.9811	1.96284e-10	--	down
EGP23956	2.8828	2.3365	1.1809	7.3541	6.6287	9.2019	1.80279	2.07046e-10	EGP23956	up
EGP01207	3.1111	1.6487	3.8056	43.4287	128.827	33.5571	4.54794	2.12818e-10	EGP01207	up
EGP00805	0.1028	0.2074	0.1784	0.9337	1.0496	0.8668	2.52344	2.17733e-10	EGP00805	up
EGP21961	0	0	0	2.1366	2.8824	1.3862	7.97743	2.38725e-10	EGP21961	up
EGP09391	4.7213	4.2812	5.0174	1.6035	1.8225	1.7498	-1.47693	2.40619e-10	EGP09391	down
EGP06632	15.0212	16.342	18.771	4.4968	8.7057	4.9262	-1.50222	2.42357e-10	EGP06632	down
EGP13201	0.8577	1.0529	0.8977	0.3664	0.3635	0.2374	-1.57192	2.5985e-10	EGP13201	down
EGP11281	21.6965	22.3395	20.2644	10.0393	10.8876	11.2202	-1.04139	2.60904e-10	EGP11281	down
EGP07179	0	0	0	3.9041	4.6592	3.0264	7.89789	2.6366e-10	EGP07179	up
EGP29910	5.4001	4.1854	3.383	1.1144	0.8705	0.27	-2.55551	2.75067e-10	EGP29910	down
EGP21615	121.752	114.629	93.7013	47.5362	27.1529	41.1801	-1.55129	2.75169e-10	EGP21615	down
EGP26887	0.5801	1.0274	0.7065	2.7205	2.5742	2.6668	1.74878	2.77466e-10	EGP26887	up
novel.394	0.1363	0.3457	0.5507	2.4922	1.7693	2.7586	2.75715	2.79912e-10	--	up
EGP31798	0	0	0	0.7313	1.7891	0.7795	8.0445	2.93915e-10	EGP31798	up
EGP28145	2.2774	2.77	2.3012	6.6514	6.8138	6.3134	1.39013	3.25736e-10	EGP28145	up
EGP33547	0.2608	0.1203	0.1538	1.2642	1.5963	0.9563	2.77613	3.30572e-10	EGP33547	up
EGP23552	1.3201	1.3639	0.961	2.6226	3.6327	2.6809	1.25182	3.31508e-10	EGP23552	up
EGP10319	7.5012	5.9752	7.8045	12.2437	14.9214	16.9959	1.01208	3.38497e-10	EGP10319	up
EGP20723	14.7178	14.1408	16.2887	61.4107	111.203	52.1904	2.27703	3.43618e-10	EGP20723	up
EGP29660	2.7044	3.8183	2.9447	8.8567	7.4118	11.1302	1.49313	3.73793e-10	EGP29660	up
novel.702	0.5255	0.7487	0.7027	1.7577	2.3356	2.3371	1.66894	3.76883e-10	--	up
EGP22353	6.0246	8.1003	7.189	2.3026	2.012	3.4943	-1.49302	3.82362e-10	EGP22353	down
EGP03045	7.3243	6.1725	6.2899	2.7109	3.6018	1.8388	-1.31584	3.8632e-10	EGP03045	down
EGP26085	0.2214	0.2412	0.2952	1.0097	1.143	1.0608	2.05332	3.97905e-10	EGP26085	up
novel.708	0	0	0	1.7753	3.2258	2.3195	7.86642	4.05158e-10	--	up
EGP15843	0.7342	0.6116	0.5152	3.5872	3.3334	2.651	2.3129	4.1e-10	EGP15843	up
novel.1100	0	0	0	0.3829	0.375	0.4291	7.78276	4.49489e-10	--	up
EGP00980	1.3701	1.4879	1.5171	0.6363	0.6075	0.5448	-1.32767	4.50858e-10	EGP00980	down
EGP08936	0.2435	0.5617	0.4921	3.3687	2.8892	2.9212	2.80631	4.64865e-10	EGP08936	up
EGP24154	1.5125	1.806	2.0227	3.672	4.5017	4.5811	1.22115	4.97768e-10	EGP24154	up
EGP12321	10.5184	9.5855	8.857	2.8929	3.5615	4.2196	-1.48472	5.16817e-10	EGP12321	down
EGP31936	67.9425	61.6874	57.0508	30.1419	39.9405	21.6054	-1.06395	5.46246e-10	EGP31936	down
novel.282	0.0295	0.102	0.0372	1.3822	1.5505	1.4364	4.6731	5.54532e-10	--	up
EGP20088	0.2302	0.4425	0.1938	3.3289	3.6077	4.795	3.71766	5.62394e-10	EGP20088	up
EGP11294	4.9032	6.4543	4.0838	2.0205	1.2529	2.3312	-1.50663	5.68568e-10	EGP11294	down
EGP13921	1.5311	3.5634	7.5284	0	0	0	-9.51329	5.73887e-10	EGP13921	down
EGP18673	2.1729	2.8403	1.7382	7.5582	7.2566	5.3406	1.53738	5.82557e-10	EGP18673	up
EGP05701	0.9262	1.4862	1.0681	3.305	3.0427	3.8247	1.51006	5.90845e-10	EGP05701	up
EGP15686	1.2553	0.4953	0.7302	0	0	0	-7.89549	5.91999e-10	EGP15686	down
EGP09557	0	0.801	0.3509	5.5372	8.3963	7.8115	4.25262	7.24405e-10	EGP09557	up
EGP13736	0.5421	0.594	0.8559	0.0477	0.0152	0.0508	-4.18777	7.38229e-10	EGP13736	down
EGP31045	26.4598	23.9996	22.9911	14.458	8.052	12.6128	-1.10735	7.52201e-10	EGP31045	down
EGP24145	0.2897	0.3341	0.1372	2.0382	1.9459	2.1725	2.95601	8.00216e-10	EGP24145	up
EGP30274	16.5047	18.0948	15.6922	7.0178	7.9182	7.2535	-1.21972	8.30814e-10	EGP30274	down
novel.1706	1.1084	0.9929	0.9515	2.2586	2.3611	2.2594	1.12863	8.9911e-10	--	up
EGP23797	0.8298	0.834	0.8684	2.2239	1.818	2.4593	1.31889	9.38868e-10	EGP23797	up
EGP04733	0	0	0	1.3734	0.9834	0.9149	7.70372	9.39289e-10	EGP04733	up
EGP28335	4.2167	4.373	4.2966	8.8081	9.044	8.8127	1.00976	9.46797e-10	EGP28335	up
novel.1012	0	0	0	3.0106	2.5058	3.1267	7.67159	9.69885e-10	--	up
EGP06244	0	0.1731	0.0632	2.6397	4.7603	1.6881	5.28325	9.70047e-10	EGP06244	up
novel.1401	0	0	0.1287	9.6793	5.5903	8.4065	7.53251	9.71522e-10	--	up
EGP11079	1.495	1.3014	1.1045	0.0661	0.0632	0.0705	-4.33252	9.74523e-10	EGP11079	down
EGP18900	11.8571	13.9204	8.108	4.1677	5.0777	5.5694	-1.23493	1.04856e-09	EGP18900	down
EGP32505	0	0	0	0.8025	0.9121	0.4888	7.71888	1.09348e-09	EGP32505	up
EGP11089	18.2172	17.4256	23.8903	46.7738	30.7682	52.833	1.08924	1.14807e-09	EGP11089	up
EGP26402	0.0946	0.1091	0.4182	3.0501	1.8531	2.8964	3.66286	1.20361e-09	EGP26402	up
EGP26086	0.0095	0.011	0.0241	0.4025	0.6512	0.4171	5.05067	1.21429e-09	EGP26086	up
EGP29761	0.8104	0.6525	0.6952	2.6533	2.1737	1.7962	1.5746	1.28284e-09	EGP29761	up
novel.1268	0	0	0.1119	2.0424	1.7186	1.2914	5.60374	1.28673e-09	--	up
EGP13021	5.8339	5.3527	5.5968	12.5585	15.1011	8.5526	1.07064	1.28932e-09	EGP13021	up
EGP30034	3.8154	4.205	3.427	1.7149	1.6135	1.0067	-1.43665	1.45354e-09	EGP30034	down
EGP06080	4.592	3.4458	3.1097	8.0115	8.2681	12.4459	1.31861	1.46771e-09	EGP06080	up
EGP30603	0.402	0.6001	0.3883	1.8023	2.0384	2.128	2.06305	1.51288e-09	EGP30603	up
EGP31290	3.1338	2.8148	2.2418	5.9506	6.7367	6.2387	1.16238	1.5254e-09	EGP31290	up
EGP04936	0	0	0	1.0056	0.9108	0.8245	7.59872	1.54122e-09	EGP04936	up
novel.1698	0	0	0	1.8203	1.4614	1.1906	7.62347	1.55149e-09	--	up
EGP09616	14.9438	12.4636	15.4102	85.2635	39.8363	97.6999	2.33692	1.66505e-09	EGP09616	up
EGP24307	4.8453	4.4373	5.2456	2.4159	1.1352	2.0721	-1.41346	1.73664e-09	EGP24307	down
EGP33693	0.4578	0.3828	0.4193	1.1944	1.4607	1.3304	1.61896	1.74292e-09	EGP33693	up
EGP20936	506.171	534.086	523.708	86.0413	190.184	124.097	-2.00492	1.75124e-09	EGP20936	down
novel.484	0.597	0.5827	0.5453	2.3047	1.203	1.8596	1.59399	1.76635e-09	--	up
EGP13603	33.7705	31.435	31.1437	69.5559	84.8081	46.942	1.0241	1.79247e-09	EGP13603	up
EGP31975	7.2355	7.1561	5.8368	3.6914	1.9785	3.0833	-1.25219	1.85015e-09	EGP31975	down
EGP09939	0.8343	1.3631	0.9659	3.3422	3.6189	4.6484	1.83908	1.90131e-09	EGP09939	up
novel.1576	0	0.0196	0	1.256	1.085	1.1688	7.36361	1.90757e-09	--	up
EGP23957	1.5705	1.9889	0.9724	4.6577	4.4469	4.9646	1.58722	1.91657e-09	EGP23957	up
EGP04887	11.7983	10.1919	7.543	20.2667	19.4035	21.4199	1.00237	1.93291e-09	EGP04887	up
EGP08786	2.3147	2.0143	1.5406	0.1625	0.2793	0.7102	-2.40187	1.99167e-09	EGP08786	down
novel.186	0	0	0	1.0602	1.6448	0.8828	7.6286	2.01363e-09	--	up
EGP21154	0.6108	0.4615	0.3724	1.8274	2.5227	1.7372	2.0242	2.06216e-09	EGP21154	up
EGP06370	0.1559	0.3056	0.315	1.992	1.2388	1.0324	2.43451	2.06826e-09	EGP06370	up
EGP05867	0.1285	0.0247	0.0812	1.0547	0.935	1.0707	3.63347	2.14542e-09	EGP05867	up
EGP16369	0.5448	0.5984	0.7208	1.9162	2.9329	2.626	1.97183	2.21656e-09	EGP16369	up
EGP30956	0.5102	0.5983	0.4941	1.4059	1.3423	1.3072	1.29965	2.2527e-09	EGP30956	up
EGP21891	0.0876	0	0.0221	1.0476	0.706	0.7882	4.40374	2.29667e-09	EGP21891	up
EGP16430	7.6251	7.121	7.1514	3.4027	4.2042	3.4847	-1.02017	2.3527e-09	EGP16430	down
novel.1067	3.5226	3.0561	3.3468	1.1331	1.1865	0.7792	-1.71486	2.36506e-09	--	down
EGP21860	8.2534	7.5498	7.0097	3.3926	2.7611	3.379	-1.30347	2.37984e-09	EGP21860	down
novel.508	0.8897	0.5597	0.7151	3.9831	4.8892	5.5596	2.68559	2.51572e-09	--	up
EGP31806	0.1444	0.0952	0.0521	0.8585	0.5772	0.5929	2.72768	2.56527e-09	EGP31806	up
EGP02427	2.8395	3.7746	5.8964	0.8464	0.0539	0.5413	-3.16829	2.63132e-09	EGP02427	down
novel.501	0	0	0	1.482	1.3206	0.7021	7.60256	2.7582e-09	--	up
novel.1672	0	0	0	5.1337	6.172	8.1066	7.53805	2.76266e-09	--	up
novel.431	0	0	0	2.4047	1.9426	1.8402	7.51531	2.77274e-09	--	up
novel.2212	7.9584	7.5796	4.3406	1.9794	1.7548	1.507	-1.96494	2.85024e-09	--	down
EGP04165	3.1099	2.1521	2.5314	0.9724	0.3868	0.3455	-2.23318	2.8979e-09	EGP04165	down
EGP25913	6.6655	5.3768	5.4233	2.0138	2.5177	2.1465	-1.4279	2.9165e-09	EGP25913	down
EGP27920	8.8129	10.0151	10.3128	25.3773	24.5185	20.7324	1.24207	2.93842e-09	EGP27920	up
novel.458	0	0	0	1.2413	1.8518	0.951	7.57389	2.94219e-09	--	up
EGP28022	5.3279	5.9987	5.9284	15.097	11.2184	14.3477	1.19728	2.97911e-09	EGP28022	up
EGP10181	1.1155	0.9873	1.1795	5.262	2.6425	3.7283	1.78413	3.0188e-09	EGP10181	up
EGP13366	2.4102	2.7067	2.2432	5.8008	6.3192	5.3903	1.21071	3.0248e-09	EGP13366	up
EGP13587	3.6152	4.6782	5.1973	1.861	1.3819	1.7264	-1.47995	3.21199e-09	EGP13587	down
EGP30458	6.3498	6.305	5.6986	9.8524	12.8268	16.0506	1.0353	3.25062e-09	EGP30458	up
EGP32177	0	0	0	0.539	1.0292	0.8243	7.54139	3.41577e-09	EGP32177	up
EGP31416	0.5944	1.3183	0.794	0.0938	0.1919	0.1571	-2.64586	3.54801e-09	EGP31416	down
EGP19462	1.3881	1.1964	0.867	0.2325	0.222	0.305	-2.23351	3.68159e-09	EGP19462	down
EGP30890	25.8796	26.3692	21.1069	10.1263	6.6218	14.7116	-1.26493	3.77825e-09	EGP30890	down
EGP08659	2.3418	2.6624	1.817	0.353	0.2247	0.6271	-2.55851	3.83962e-09	EGP08659	down
EGP21076	1.0484	0.6046	0.7945	3.5033	3.5207	5.8305	2.339	3.87182e-09	EGP21076	up
novel.2410	3.2681	2.787	2.7019	7.6174	5.0553	9.5797	1.30042	4.12778e-09	--	up
EGP04815	2.3879	2.6417	2.5852	6.6282	5.2643	5.116	1.12123	4.20925e-09	EGP04815	up
EGP32043	8.1879	7.9019	7.7828	3.6492	1.7537	3.994	-1.39023	4.27701e-09	EGP32043	down
EGP33095	4.8309	3.9002	3.3995	11.6522	9.1933	14.7486	1.50307	4.37012e-09	EGP33095	up
EGP13971	0.5193	0.5657	0.6195	2.2665	3.9079	1.9831	2.22709	4.48732e-09	EGP13971	up
EGP18310	5.1952	5.7334	4.5792	2.1912	1.6004	3.1764	-1.19823	4.63353e-09	EGP18310	down
EGP21684	6.3418	7.0185	5.5562	3.0087	2.7084	2.0616	-1.31986	4.69721e-09	EGP21684	down
novel.1560	0	0	0	1.0883	1.2814	1.044	7.42364	4.82875e-09	--	up
novel.835	0	0.0461	0	2.0636	2.1045	3.6492	7.282	4.87006e-09	--	up
EGP11182	0	0	0	0.4404	0.4955	0.5365	7.41422	5.03582e-09	EGP11182	up
EGP08937	0	0	0	0.3343	0.7689	0.4373	7.53332	5.13492e-09	EGP08937	up
EGP12831	1.516	2.2481	2.0242	0.2031	0.1455	0	-4.06258	5.13964e-09	EGP12831	down
EGP10410	1.1676	1.0426	1.7602	4.2837	3.9633	4.8013	1.68455	5.4663e-09	EGP10410	up
EGP17200	4.2355	5.3714	3.9294	1.8129	1.6784	2.7872	-1.15155	5.50221e-09	EGP17200	down
EGP21830	2.7783	2.7189	2.8357	6.2849	6.2517	5.4714	1.07305	5.5181e-09	EGP21830	up
EGP30616	4.9315	4.8493	5.1508	1.9398	2.3592	3.266	-1.02371	5.58085e-09	EGP30616	down
EGP05062	0.7589	0.4678	0.7106	1.8409	2.4459	1.6842	1.58302	5.84933e-09	EGP05062	up
EGP12319	8.0773	8.3494	6.0636	2.5017	2.3031	1.238	-1.93062	5.92688e-09	EGP12319	down
EGP30589	0	0.021	0	1.4936	0.7333	1.2736	7.25975	5.93314e-09	EGP30589	up
novel.2086	1.115	1.3114	1.1294	2.4463	2.4097	2.6765	1.04294	5.93673e-09	--	up
EGP20060	0.7946	0.7785	1.0144	2.0035	2.2189	1.7084	1.16248	6.19631e-09	EGP20060	up
EGP13071	0.0296	0	0	0.9879	0.6288	1.2747	6.40586	6.26696e-09	EGP13071	up
novel.1398	0.5934	0.3624	0.0441	2.4149	2.501	2.5304	2.81081	6.80433e-09	--	up
EGP04366	0	0	0	2.2791	1.6846	2.8994	7.40744	6.8146e-09	EGP04366	up
EGP14825	100.608	92.2572	56.3779	222.309	209.377	220.823	1.34911	7.12943e-09	EGP14825	up
EGP21950	1.6137	1.9941	1.747	0.4865	0.1032	0.4033	-2.48223	7.53867e-09	EGP21950	down
EGP32320	1.5649	1.3166	1.9069	4.1016	3.4006	3.7965	1.20086	7.58157e-09	EGP32320	up
EGP11248	0	0	0	2.4507	1.6085	3.1019	7.40938	7.69605e-09	EGP11248	up
EGP33701	1.709	2.1682	1.484	3.732	5.7153	4.5119	1.3411	7.87023e-09	EGP33701	up
novel.1884	2.0432	2.6185	5.694	0.7605	0.3631	0.6485	-2.58975	8.17507e-09	--	down
EGP15737	2.17	1.5443	1.1663	0	0	0	-7.3886	8.35713e-09	EGP15737	down
EGP20089	0.1756	0	0.6653	4.0142	5.6995	3.2913	3.97423	8.38822e-09	EGP20089	up
EGP09847	8.0561	8.9712	8.9473	22.9632	26.2772	14.8419	1.26663	8.44911e-09	EGP09847	up
EGP16069	0.8364	0.5513	0.3521	2.4051	1.828	2.5635	1.90523	8.71604e-09	EGP16069	up
EGP30796	1.8533	2.9206	1.5065	0.4733	0.6778	0.2523	-2.19123	8.88349e-09	EGP30796	down
novel.655	11.45	10.5649	11.2082	2.5172	3.685	2.5042	-1.96661	9.34756e-09	--	down
EGP11162	0.3673	0.7943	0.6379	3.1223	2.7239	3.3854	2.33428	9.79304e-09	EGP11162	up
EGP28710	3.6519	4.5383	3.021	11.3381	7.7155	7.5532	1.20571	1.03697e-08	EGP28710	up
EGP27552	0.2913	0.4652	0.0849	1.4188	1.6807	2.0444	2.556	1.04078e-08	EGP27552	up
EGP10379	2.7172	2.312	2.3068	0.4701	0.3491	0.501	-2.52244	1.05988e-08	EGP10379	down
EGP29979	2.3225	2.1352	2.0832	5.2885	4.936	5.6369	1.23393	1.07317e-08	EGP29979	up
EGP16572	0.1452	0.0718	0.0524	0.8269	0.8591	1.2443	3.35928	1.08626e-08	EGP16572	up
novel.530	1.3168	1.2216	1.0847	0	0.0961	0.0358	-4.79286	1.08812e-08	--	down
EGP21838	2.7798	2.9249	2.7719	6.0041	7.8614	8.7157	1.37277	1.18923e-08	EGP21838	up
EGP22133	0.34	0.2696	0.2147	1.1961	1.2609	3.2668	2.74036	1.18944e-08	EGP22133	up
EGP15208	1.3079	1.9972	1.6054	3.2183	4.5161	5.0649	1.34516	1.18967e-08	EGP15208	up
novel.879	0	0	0	1.5205	1.1167	2.8674	7.41755	1.21149e-08	--	up
EGP32019	1.2086	1.3939	1.163	3.6438	3.9943	3.0928	1.47262	1.2152e-08	EGP32019	up
EGP14445	10.5742	7.9321	11.7423	5.6733	3.3168	4.4164	-1.21626	1.22673e-08	EGP14445	down
EGP07114	0.6793	0.9745	0.7952	1.9425	2.3924	2.526	1.45024	1.29049e-08	EGP07114	up
EGP18446	1.3809	1.567	1.3222	0.1828	0.2743	0.4175	-2.33627	1.29846e-08	EGP18446	down
EGP21517	2.9321	2.9021	4.2288	6.9003	8.6364	6.5493	1.09942	1.35561e-08	EGP21517	up
EGP18843	6.7209	7.7122	6.1502	17.1278	11.1702	14.6564	1.01942	1.36543e-08	EGP18843	up
EGP10888	9.5689	7.5487	9.3307	4.7361	3.361	5.2641	-1.0293	1.4716e-08	EGP10888	down
EGP06124	4.7374	3.9929	5.1398	14.5988	9.3146	11.7654	1.32237	1.47319e-08	EGP06124	up
EGP10359	4.978	6.4823	5.8529	2.2863	2.645	3.297	-1.11408	1.50831e-08	EGP10359	down
EGP05759	3.4115	3.8325	2.425	0.9697	1.0746	1.6611	-1.42915	1.55018e-08	EGP05759	down
EGP05249	1.4762	1.435	1.172	0.2225	0.3777	0.2899	-2.23557	1.56145e-08	EGP05249	down
EGP07780	1.8657	1.8649	0.8379	4.1806	6.0798	6.3732	1.81256	1.5647e-08	EGP07780	up
EGP31820	10.9828	9.7087	7.9508	3.4916	6.106	3.7401	-1.14055	1.57413e-08	EGP31820	down
novel.1338	1.2407	1.1209	1.2797	0.0727	0.2778	0.2584	-2.61997	1.59671e-08	--	down
EGP06424	1.7391	1.8148	2.1966	0.2428	0.2781	0.2587	-2.91938	1.60729e-08	EGP06424	down
EGP31046	33.7392	28.5053	33.1593	19.2388	10.5615	13.0728	-1.19603	1.64512e-08	EGP31046	down
EGP04413	0.7079	0.7873	0.7984	2.4309	2.6605	2.2435	1.64196	1.65405e-08	EGP04413	up
EGP06126	0.373	0.7798	0.3534	2.4602	1.8791	2.0396	2.04478	1.67485e-08	EGP06126	up
EGP25951	0.1126	0.2598	0.249	1.783	1.6077	1.1262	2.84886	1.71156e-08	EGP25951	up
EGP06600	2.7724	3.4182	2.8175	5.7915	6.9919	7.3679	1.12216	1.80466e-08	EGP06600	up
EGP06431	0.3192	0.1516	0.0474	1.4752	0.8409	2.0653	2.99574	1.81395e-08	EGP06431	up
EGP25924	7.2216	7.3868	7.6566	3.1212	4.0715	1.8446	-1.33509	1.88721e-08	EGP25924	down
novel.1827	0.5936	0.6509	0.3933	2.1792	1.0893	2.6754	1.81253	2.02398e-08	--	up
EGP31025	2.1422	2.2031	1.7588	0.8373	0.6795	0.7363	-1.48083	2.05154e-08	EGP31025	down
novel.1818	3.208	2.3966	2.6706	6.3688	6.9375	6.1051	1.1858	2.0624e-08	--	up
novel.1748	6.6004	3.8782	3.5654	14.1639	9.9445	12.9181	1.34936	2.13352e-08	--	up
EGP29715	1.392	1.0848	1.1167	0.2647	0.2737	0.047	-2.64179	2.14228e-08	EGP29715	down
EGP02708	2.8993	2.1185	1.8651	4.9831	5.2413	4.7262	1.07203	2.20758e-08	EGP02708	up
EGP15437	2.1119	2.0475	1.9137	0.7716	0.9594	0.7268	-1.34273	2.23219e-08	EGP15437	down
novel.996	1.8059	2.0993	2.3169	0.6002	0.8914	0.9241	-1.40343	2.23249e-08	--	down
EGP21200	3.5411	3.0253	3.5339	0.7689	0.7341	1.202	-1.94937	2.27249e-08	EGP21200	down
EGP30737	1.965	2.2888	2.2854	4.9958	9.1255	4.401	1.46655	2.30862e-08	EGP30737	up
EGP13896	0.0809	0	0.0681	0.98	1.0563	1.1793	4.36682	2.31071e-08	EGP13896	up
EGP33390	0.2644	0.1525	0.5009	4.8053	4.2918	7.1046	4.12701	2.32682e-08	EGP33390	up
EGP13890	1.4472	1.6692	1.2886	0.5842	0.5445	0.593	-1.39725	2.32831e-08	EGP13890	down
EGP30061	2.9209	2.9556	4.1873	6.1563	9.2276	6.9874	1.11678	2.36245e-08	EGP30061	up
EGP06569	0.2587	0.2797	0.2451	1.1375	1.0317	1.1316	2.033	2.39567e-08	EGP06569	up
EGP00133	1.5023	1.9196	1.5627	0.6217	0.643	0.3497	-1.65861	2.51926e-08	EGP00133	down
novel.2611	4.2019	4.9802	4.2224	2.4226	1.9491	2.0019	-1.11227	2.54019e-08	--	down
novel.1156	0.1219	0.0469	0.1027	1.9537	1.7743	1.1682	4.12017	2.63797e-08	--	up
EGP32407	0	0	0	2.0075	2.6135	2.5287	7.15829	2.6409e-08	EGP32407	up
EGP12808	0.317	0.1567	0.4575	2.336	1.8755	2.6597	2.85234	2.65227e-08	EGP12808	up
EGP03048	1.0919	1.0381	0.7268	2.3529	2.9401	2.176	1.34148	2.66887e-08	EGP03048	up
EGP20726	0.2302	0.2187	0.3592	0.7781	0.7581	0.8971	1.55871	2.76506e-08	EGP20726	up
EGP09385	1.7576	1.5204	1.8962	0.6297	0.3416	0.778	-1.61279	2.78115e-08	EGP09385	down
EGP00272	0.7478	0.9801	0.5796	3.3078	3.3293	1.6142	1.79912	2.82225e-08	EGP00272	up
novel.1661	0	0	0	3.2084	2.9703	1.6581	7.20182	2.94268e-08	--	up
EGP15057	0	0	0	0.9341	0.5753	0.8671	7.16524	2.96787e-08	EGP15057	up
EGP00234	1.2909	1.3575	1.9183	4.7413	3.6553	3.2267	1.31438	3.0485e-08	EGP00234	up
EGP12967	0	0	0	1.3654	1.2534	1.3993	7.12306	3.06085e-08	EGP12967	up
novel.1328	0.0748	0.1726	0.0472	1.0088	1.675	2.057	3.96346	3.14781e-08	--	up
novel.1601	0.1584	0.0913	0.2001	1.3619	1.2411	1.0227	2.97876	3.19891e-08	--	up
novel.2252	0.0042	0	0	0.2262	0.1784	0.2149	6.8802	3.29538e-08	--	up
EGP08887	1.8751	2.0426	1.0526	4.9672	5.9085	4.2096	1.55555	3.38095e-08	EGP08887	up
EGP09100	8.2653	5.3144	7.7398	2.7291	0.6913	0.5937	-2.44929	3.39829e-08	EGP09100	down
novel.512	0.5793	0.4716	0.5595	2.757	2.06	2.172	2.07504	3.45245e-08	--	up
EGP02276	10.4504	9.4015	9.3717	18.1348	22.6951	23.6396	1.09855	3.51943e-08	EGP02276	up
novel.1065	1.6387	1.386	1.7018	0.1708	0.2853	0.091	-3.13113	3.53988e-08	--	down
novel.1975	1.5164	1.6032	0.6384	6.2971	7.2145	3.9483	2.16493	3.57799e-08	--	up
EGP16713	0.7251	0.446	0.407	1.5492	1.6775	2.195	1.72419	3.60021e-08	EGP16713	up
EGP29901	2.1841	2.3113	2.332	5.2801	4.2597	4.7838	1.02949	3.95612e-08	EGP29901	up
EGP13798	1.1429	1.4358	1.8044	0.3111	0.2285	0.4591	-2.18039	4.15638e-08	EGP13798	down
EGP14719	358.029	348.326	363.445	119.206	201.441	157.639	-1.201	4.18014e-08	EGP14719	down
EGP16604	0.519	0.171	1.1237	4.9551	4.9798	3.3357	2.85748	4.27726e-08	EGP16604	up
EGP15134	6.1135	6.6895	4.865	3.0721	3.1335	2.099	-1.12686	4.54603e-08	EGP15134	down
EGP18564	1.7311	1.8382	1.1106	4.4139	3.5374	4.7391	1.39035	4.60207e-08	EGP18564	up
EGP21306	0.2073	0.1328	0.0291	0.9724	1.5215	0.9501	3.13599	4.65025e-08	EGP21306	up
EGP11371	3.527	4.1971	2.9699	0.4595	0.8774	0.9795	-2.25043	4.7903e-08	EGP11371	down
EGP15777	0.0569	0	0	0.4782	0.4034	0.3319	4.2434	4.83711e-08	EGP15777	up
EGP05624	0.5844	0.8487	1.9135	3.5273	6.5172	3.922	2.03378	4.85077e-08	EGP05624	up
EGP33166	1.5398	1.625	1.0169	3.9766	2.9178	2.7545	1.16267	4.91489e-08	EGP33166	up
EGP02219	3.9902	3.3694	3.9599	9.19	9.1727	10.0626	1.28651	4.98145e-08	EGP02219	up
EGP32188	1.667	0.9498	0.9386	3.4618	4.7215	2.8113	1.58116	5.05228e-08	EGP32188	up
EGP06548	1.5712	1.2376	1.2908	2.681	3.1888	2.7778	1.03321	5.0599e-08	EGP06548	up
novel.588	0	0.0362	0.0793	1.2522	1.4065	1.1384	5.10525	5.35711e-08	--	up
novel.2235	1.7871	1.9417	1.7011	0.4555	0.3769	0.615	-1.95544	5.39502e-08	--	down
novel.982	1.1251	0.7275	0.9905	0.2199	0.1908	0.1065	-2.49265	5.41736e-08	--	down
novel.1527	4.5263	5.6002	6.0982	2.5089	2.2417	2.8456	-1.13461	5.5616e-08	--	down
EGP13666	3.6237	2.6452	2.5299	5.6292	7.24	5.3695	1.00847	5.67241e-08	EGP13666	up
EGP20908	1.9662	1.9585	2.22	5.1697	4.1686	5.0262	1.18606	5.72904e-08	EGP20908	up
novel.2253	9.8011	11.12	13.1868	4.6217	5.4262	2.2634	-1.50287	5.81055e-08	--	down
EGP30361	0	0	0	2.4417	1.7932	2.5025	7.0288	6.08834e-08	EGP30361	up
EGP23619	11.4573	6.1883	10.6241	21.1665	18.7067	19.383	1.02547	6.15022e-08	EGP23619	up
EGP19311	0.016	0	0	0.8272	0.7718	0.6012	6.77652	6.20991e-08	EGP19311	up
EGP13895	2.5208	3.4205	3.2776	7.9108	8.7976	8.71	1.4302	6.2595e-08	EGP13895	up
EGP22443	1.79	1.8128	2.6469	0.0512	0	0.0546	-5.95955	6.28798e-08	EGP22443	down
novel.1169	0.1071	0	0	1.5071	1.0392	2.0972	5.24301	6.31319e-08	--	up
EGP30326	0.8684	0.9105	1.0469	2.1906	2.4891	1.9238	1.19029	6.31856e-08	EGP30326	up
EGP29985	1.0674	1.4829	0.9805	3.1572	2.8513	3.5775	1.39923	6.31983e-08	EGP29985	up
EGP15532	0.7339	1.2394	1.0593	2.9809	2.7579	3.1445	1.51875	6.61648e-08	EGP15532	up
EGP28550	3.4843	2.8491	2.3975	6.9817	5.3849	6.7268	1.08104	6.70874e-08	EGP28550	up
EGP01205	19.2665	14.7477	23.7414	114.749	317.367	94.2436	3.14951	6.72717e-08	EGP01205	up
EGP29971	0.2776	0.2479	0.1357	0.735	0.812	0.8282	1.78897	6.76925e-08	EGP29971	up
novel.589	0.3216	0.236	0.2216	1.8168	1.7672	1.1327	2.54723	6.87005e-08	--	up
EGP13728	0.2313	0.4052	0.7251	1.2859	1.7265	1.799	1.79379	7.1243e-08	EGP13728	up
novel.1611	0	0.0243	0	1.0365	1.0367	0.7628	6.75062	7.24055e-08	--	up
novel.330	0.9961	0.2802	0.1841	3.9595	2.3116	2.6111	2.53569	7.29659e-08	--	up
EGP04095	0.9902	1.1421	0.6711	3.6247	2.1629	3.2599	1.6425	7.67163e-08	EGP04095	up
EGP10631	0.0224	0.1035	0	0.6836	1.1296	0.8127	4.33875	7.73891e-08	EGP10631	up
novel.2170	0	0	0	1.151	2.0513	2.3719	7.0479	7.76529e-08	--	up
EGP07024	0.0495	0.0428	0.0469	0.4497	0.6093	0.402	3.35198	8.01255e-08	EGP07024	up
EGP04714	1.6298	2.3301	4.0099	0.4578	1.0073	0.488	-2.06076	8.30663e-08	EGP04714	down
EGP21415	0.373	0.1076	0.3062	1.6183	1.5868	0.979	2.3625	8.40734e-08	EGP21415	up
EGP09921	1.0541	1.2853	0.7608	3.3901	2.5623	4.5545	1.71305	8.41214e-08	EGP09921	up
EGP26508	1.9811	3.0555	2.5605	4.9969	6.0343	5.4701	1.08453	8.54399e-08	EGP26508	up
novel.471	10.3766	9.9046	9.1518	17.411	20.8284	26.4956	1.0933	8.82947e-08	--	up
EGP00553	0.919	0.761	1.1012	2.9563	2.6906	2.2971	1.47869	8.95743e-08	EGP00553	up
novel.929	1.7191	1.5192	1.8188	0.4581	0.7622	0.8091	-1.35835	9.25916e-08	--	down
EGP12320	9.4668	9.5539	7.6092	3.0273	3.0106	2.42	-1.6938	9.54547e-08	EGP12320	down
EGP00230	5.5167	4.3116	3.1631	9.4473	12.4324	8.845	1.19684	9.55383e-08	EGP00230	up
EGP30142	1.6695	1.4233	1.6503	4.2981	4.7536	3.7195	1.38983	1.00823e-07	EGP30142	up
EGP13756	0.1747	0.1085	0.1358	0.9141	0.8276	0.5544	2.40577	1.0181e-07	EGP13756	up
EGP01682	1.4445	1.5487	1.4905	2.9581	3.7124	3.4326	1.13348	1.06045e-07	EGP01682	up
EGP11940	1.1336	0.7208	1.0464	2.3176	3.0261	2.1433	1.32694	1.10089e-07	EGP11940	up
novel.881	14.7984	10.8852	15.6397	8.056	7.3954	5.7559	-1.00131	1.15123e-07	--	down
novel.1849	2.2137	2.2695	3.0032	0.6249	0.6884	0.3586	-2.1909	1.22019e-07	--	down
EGP31069	1.679	2.7003	1.8519	0.61	0.6354	0.6502	-1.75525	1.22886e-07	EGP31069	down
EGP30172	2.1801	2.0534	1.8128	3.8555	3.9657	6.0394	1.15174	1.23829e-07	EGP30172	up
EGP05135	4.2307	3.9201	2.1615	0.6688	0.6918	1.5149	-1.8922	1.29779e-07	EGP05135	down
EGP13615	1.7467	1.7047	2.0123	3.5334	4.2974	3.6703	1.03758	1.29796e-07	EGP13615	up
EGP19751	2.1232	1.4369	1.2412	0.6172	0.2161	0.2632	-2.17482	1.31974e-07	EGP19751	down
EGP31166	19.449	12.2012	9.876	25.0385	39.9395	36.5422	1.24574	1.36985e-07	EGP31166	up
EGP26518	4.3656	4.0825	3.9741	2.3749	2.2233	1.6712	-1.02474	1.39548e-07	EGP26518	down
novel.2161	5.766	4.0305	5.9146	12.0874	9.2321	11.1805	1.00661	1.42136e-07	--	up
EGP11170	2.1673	1.8916	2.2195	0.8699	0.7868	0.8296	-1.37725	1.49141e-07	EGP11170	down
novel.1771	2.1124	1.9796	1.4452	4.1797	6.503	5.5001	1.50119	1.56884e-07	--	up
novel.1750	0.1851	0.1423	0.0585	1.5012	0.8116	0.5591	2.83115	1.59596e-07	--	up
EGP21627	5.7932	7.7822	5.4807	2.8236	3.7639	2.8676	-1.0483	1.60847e-07	EGP21627	down
EGP18941	0.8867	0.5753	0.28	3.119	3.226	3.0475	2.35942	1.65703e-07	EGP18941	up
EGP15691	0.0789	0	0.1328	1.0174	0.7358	1.2487	3.80303	1.66465e-07	EGP15691	up
novel.1571	5.2458	7.4381	8.3887	12.5838	16.2702	24.7206	1.30792	1.66985e-07	--	up
EGP33440	3.4881	4.7774	5.397	11.1448	8.4927	10.6803	1.1153	1.69186e-07	EGP33440	up
EGP13058	0.4272	0.3188	0.3809	1.65	1.7159	1.3504	2.02213	1.69455e-07	EGP13058	up
EGP24457	1.4259	0.7627	1.1745	2.8833	3.1692	2.8925	1.36539	1.70423e-07	EGP24457	up
EGP19115	1.5885	1.8603	1.389	3.3526	4.1036	3.8484	1.18314	1.75425e-07	EGP19115	up
EGP24324	12.1412	11.6453	12.8583	7.7293	5.1843	3.8586	-1.16581	1.76123e-07	EGP24324	down
EGP10594	2.629	3.1479	2.3217	1.3846	1.3718	0.7518	-1.24275	1.78853e-07	EGP10594	down
EGP19099	2.4391	2.2714	3.0579	1.038	0.9101	1.3096	-1.2964	1.78983e-07	EGP19099	down
EGP33778	1.016	2.1093	1.2833	5.0034	6.3692	5.1638	1.87638	1.79657e-07	EGP33778	up
novel.1729	2.4259	1.8023	3.071	1.4414	1.0765	1.0652	-1.06686	1.83127e-07	--	down
novel.658	1.7156	1.42	1.912	4.0704	3.3891	3.5818	1.09017	1.84975e-07	--	up
EGP28180	6.526	10.1247	9.1181	2.9795	4.2022	2.5984	-1.42994	1.85151e-07	EGP28180	down
EGP10001	0.5131	0.7739	1.4956	3.0082	4.6836	3.749	2.02163	1.86813e-07	EGP10001	up
EGP01099	1.466	1.1272	0.7856	3.9587	3.3817	4.2196	1.71756	1.88573e-07	EGP01099	up
EGP16620	6.366	5.3779	4.902	2.5863	3.0318	2.7916	-1.02741	1.9703e-07	EGP16620	down
EGP06729	1.2293	1.3441	1.5123	3.5004	3.5564	2.3942	1.17555	1.98832e-07	EGP06729	up
EGP24496	1.014	1.3191	1.236	0.5253	0.3036	0.4126	-1.56434	2.06214e-07	EGP24496	down
EGP24851	2.0009	2.0845	2.7719	5.5248	4.6966	5.5258	1.16454	2.27318e-07	EGP24851	up
EGP18386	3.4551	3.3642	4.1666	1.3029	1.4966	2.2133	-1.17531	2.27868e-07	EGP18386	down
EGP06404	0.3511	0.0715	0.1304	1.7192	0.9247	1.2131	2.72492	2.28117e-07	EGP06404	up
EGP18113	0.4022	0.5709	0.5862	2.2491	1.5932	2.552	2.00317	2.28689e-07	EGP18113	up
EGP28658	1.4417	2.0508	0.7891	0.2536	0.2152	0.3003	-2.52334	2.38991e-07	EGP28658	down
novel.425	0.2023	0.2	0.073	0.7794	1.2941	2.3117	3.13908	2.50358e-07	--	up
EGP09504	1.6841	1.8623	1.4693	3.7865	3.1875	3.3633	1.00087	2.63499e-07	EGP09504	up
novel.641	0	0	0	1.9686	2.2822	0.5995	6.97952	2.77919e-07	--	up
EGP18474	6.0079	6.7697	5.4203	2.2724	2.7429	4.1521	-1.03226	2.78645e-07	EGP18474	down
EGP29719	0.9362	1.0577	0.6757	2.0161	2.5879	2.5071	1.36838	2.8914e-07	EGP29719	up
EGP22223	0.4321	0.4642	0.4411	0.1319	0.159	0.1479	-1.64639	3.06514e-07	EGP22223	down
EGP02214	1.5102	1.4389	1.5205	0.6416	0.686	0.7522	-1.14523	3.08963e-07	EGP02214	down
EGP18158	2.5841	3.3321	2.0678	1.1103	1.2577	1.1434	-1.22489	3.20769e-07	EGP18158	down
EGP21908	0.3357	0.3668	0.5356	1.5124	1.4242	1.2367	1.72603	3.2225e-07	EGP21908	up
novel.2387	0.6303	1.2302	0.7348	2.9559	3.2563	4.1201	1.95778	3.4092e-07	--	up
novel.1500	0.1129	0.0651	0.0713	2.4496	1.8962	1.3408	4.44743	3.59157e-07	--	up
EGP09200	0.4322	0.3852	0.4219	1.244	0.9347	1.0927	1.35802	3.68021e-07	EGP09200	up
novel.906	0.0277	0.1598	0.07	1.1047	0.7445	1.1774	3.54134	3.69436e-07	--	up
EGP13680	0.9416	0.3341	0.8691	2.9723	3.4864	2.3535	1.9949	3.82857e-07	EGP13680	up
EGP13826	1.5311	1.735	1.4928	0.5827	0.5563	0.8225	-1.32396	3.88286e-07	EGP13826	down
EGP23701	2.9466	3.0799	2.9658	0.9717	0.9277	0.748	-1.80072	3.91229e-07	EGP23701	down
novel.1419	278.564	297.331	279.344	36.801	97.6957	48.4321	-2.26317	3.92538e-07	--	down
EGP14245	0.429	0.2604	0.4135	1.2575	1.2258	0.903	1.57735	4.22139e-07	EGP14245	up
novel.1119	0.0224	0.0259	0	0.9465	1.0041	0.6726	5.66402	4.22449e-07	--	up
EGP01200	0.2042	0.1413	0.4643	3.1846	9.8984	2.1949	4.20626	4.32678e-07	EGP01200	up
EGP09619	0.7482	1.0786	0.8805	1.9339	2.4554	2.3375	1.27779	4.3764e-07	EGP09619	up
EGP31455	2.6021	1.6445	1.7784	4.9109	3.6711	4.789	1.10189	4.54293e-07	EGP31455	up
EGP19786	3.1507	1.7594	2.0708	6.068	4.5644	4.7395	1.09295	4.65013e-07	EGP19786	up
EGP22648	0.2763	0.3069	0.336	0.7559	0.8935	1.2533	1.62079	4.73292e-07	EGP22648	up
novel.2023	0.7034	0.1623	0.3554	5.9381	4.8819	3.8679	3.5094	4.80063e-07	--	up
EGP23910	1.1183	0.7255	0.5297	4.1794	4.0684	3.2319	2.21256	4.84661e-07	EGP23910	up
EGP30688	2.301	2.6824	2.625	1.2474	1.0248	1.5615	-1.03195	5.01741e-07	EGP30688	down
EGP30280	0.3254	0.2502	0.274	1.5261	2.7926	2.2366	2.902	5.05071e-07	EGP30280	up
EGP15718	56.8179	33.4115	9.6463	368.609	309.764	377.755	3.36403	5.08123e-07	EGP15718	up
EGP16989	0.8682	0.8901	0.8834	2.658	2.2677	2.2002	1.39237	5.13635e-07	EGP16989	up
EGP14615	2.5285	2.4211	2.1693	0.4475	0.5875	0.5962	-2.16816	5.32424e-07	EGP14615	down
EGP29783	0.1655	0.3273	0.1792	1.3864	1.456	0.8571	2.42946	5.361e-07	EGP29783	up
EGP15465	0	0	0	4.3009	5.5275	0.764	8.45476	5.3835e-07	EGP15465	up
EGP13706	2.3211	1.9554	1.4276	4.3307	5.2643	3.5818	1.1633	5.40946e-07	EGP13706	up
EGP02917	2.4578	3.8572	3.4098	1.1338	0.7668	1.1078	-1.73345	5.44323e-07	EGP02917	down
EGP11115	2.3178	2.6733	1.6381	0.6471	0.7104	0.7587	-1.6908	5.68848e-07	EGP11115	down
novel.2026	1.2593	1.8092	1.172	0.4145	0.3957	0.3313	-1.9302	5.85404e-07	--	down
EGP19186	1.5125	1.4154	1.7122	3.0283	4.3128	2.782	1.08935	5.86578e-07	EGP19186	up
EGP28688	0.6007	0.5543	1.2519	4.9304	4.8753	1.6141	2.21865	5.99389e-07	EGP28688	up
EGP06395	2.7213	2.5649	3.0306	8.989	8.8113	4.2055	1.36689	6.03165e-07	EGP06395	up
EGP23836	0.0749	0.0432	0.0473	1.4491	1.7608	0.6553	4.48667	6.06531e-07	EGP23836	up
EGP26191	3.8527	3.4181	3.2537	1.9513	1.6333	1.2251	-1.16873	6.17041e-07	EGP26191	down
novel.1344	0.0936	0	0.1182	0.8049	1.1527	1.1309	3.82942	6.18078e-07	--	up
EGP15832	23.0487	28.8732	24.5851	17.327	8.0861	9.7856	-1.16074	6.36002e-07	EGP15832	down
EGP19686	4.4909	6.5831	3.2134	9.6494	13.3236	9.3451	1.13869	6.50581e-07	EGP19686	up
EGP10470	0.6902	0.5711	0.7012	1.6537	1.4445	2.0814	1.35681	6.53559e-07	EGP10470	up
EGP19362	8.3967	6.8825	8.707	2.5815	5.4222	2.7326	-1.19668	6.68495e-07	EGP19362	down
EGP08909	0.1254	0.0241	0.396	4.4357	13.9914	3.8659	5.32212	6.68555e-07	EGP08909	up
EGP26639	1.9413	2.3347	2.0538	0.7004	1.0773	0.9331	-1.26086	6.71047e-07	EGP26639	down
EGP13738	0.182	0.0191	0.0418	0.5431	0.9629	0.8063	3.15297	6.82554e-07	EGP13738	up
EGP16138	0	0.072	0.1183	0.9521	0.6992	1.6394	4.14863	7.11625e-07	EGP16138	up
novel.1503	0.2147	0	0	1.3425	3.2044	3.2197	4.99231	7.53778e-07	--	up
EGP17014	5.7402	4.7222	3.7941	2.7501	2.211	2.2627	-1.02442	7.5546e-07	EGP17014	down
EGP15827	11.5679	13.952	11.5218	0.8526	0.814	0	-4.50366	7.785e-07	EGP15827	down
EGP13609	1.78	1.3598	1.3139	3.6592	3.0019	3.5825	1.15304	7.88379e-07	EGP13609	up
novel.1605	1.8498	2.252	1.8172	0.482	0.5368	0.5993	-1.91261	8.06088e-07	--	down
EGP26856	2.4571	2.3681	2.6784	6.0383	4.6722	5.4686	1.06875	8.23265e-07	EGP26856	up
EGP31404	2.7191	2.4421	1.6046	5.4878	4.1416	10.4175	1.52055	8.54865e-07	EGP31404	up
novel.2356	0.7847	1.335	1.1646	3.1053	2.24	3.0647	1.32216	8.90507e-07	--	up
EGP17205	1.0321	1.144	1.3374	3.3003	2.1156	2.4792	1.13107	8.9548e-07	EGP17205	up
novel.1157	1.6247	1.74	1.368	0.1814	0.3897	0.2417	-2.57421	9.02252e-07	--	down
EGP00896	8.0876	7.3112	7.0678	3.3831	3.8172	4.3709	-1.00105	9.16061e-07	EGP00896	down
EGP30865	0	0.0441	0.1449	0.6724	0.856	0.5973	3.53893	9.29127e-07	EGP30865	up
EGP30649	0.7627	0.9335	1.1795	3.9602	1.5333	3.6764	1.63417	9.39046e-07	EGP30649	up
EGP30936	2.6068	2.2357	2.2372	6.0738	5.5369	4.302	1.12659	9.94961e-07	EGP30936	up
EGP03128	1.1048	0.7202	1.1325	2.2152	2.9215	2.1411	1.26002	1.03081e-06	EGP03128	up
EGP04557	0.5232	0.6034	0.7116	1.7695	1.4416	2.9674	1.71046	1.05415e-06	EGP04557	up
EGP12317	6.1985	6.7627	5.6073	2.1607	2.4379	1.3609	-1.67273	1.09598e-06	EGP12317	down
EGP16759	0.2969	0.5658	0.3098	1.0444	1.185	1.5166	1.6375	1.12403e-06	EGP16759	up
EGP26878	3.2666	2.2569	2.9699	1.3137	1.4662	1.42	-1.05781	1.17767e-06	EGP26878	down
EGP13430	2.9464	3.5218	1.6239	0.6281	1.1094	0.6026	-1.82501	1.225e-06	EGP13430	down
EGP18115	2.3382	1.9516	1.9041	4.9059	3.8228	5.3445	1.13693	1.23316e-06	EGP18115	up
EGP05419	0.617	0.4186	0.7106	1.8512	1.8689	1.4061	1.51737	1.23633e-06	EGP05419	up
novel.1722	2.8056	3.5954	2.2049	0.731	0.5583	0.4675	-2.33051	1.25278e-06	--	down
EGP31068	0.8702	1.1919	0.7557	2.232	1.9179	2.2261	1.13616	1.27562e-06	EGP31068	up
novel.1176	0.2343	0.4504	0.3453	1.1218	1.3988	1.2689	1.85137	1.3109e-06	--	up
novel.1621	2.6615	3.4736	2.2116	7.2268	7.1348	7.3528	1.33687	1.35831e-06	--	up
EGP05129	0.1839	0.5656	0.3871	2.3719	2.1959	2.758	2.66968	1.38686e-06	EGP05129	up
EGP26966	0.2199	0.3623	0.4364	2.0625	1.6878	1.1777	2.25559	1.44015e-06	EGP26966	up
EGP21352	4.2034	3.9743	3.5498	2.2637	1.8877	1.8326	-1.01244	1.48446e-06	EGP21352	down
EGP15856	4.4197	4.1307	4.3311	11.8831	8.6155	9.5233	1.17923	1.52079e-06	EGP15856	up
EGP23889	2.3083	1.3505	2.4085	5.217	4.7935	4.6409	1.23092	1.52549e-06	EGP23889	up
EGP09638	0.1615	0.0745	0.0816	0.5934	1.8684	0.2692	3.05525	1.54563e-06	EGP09638	up
EGP13296	0.3362	1.0083	0.4247	3.43	1.6938	2.9837	2.16085	1.61131e-06	EGP13296	up
EGP08435	0.022	0.2536	0.0833	0.6188	1.0831	1.4566	3.11974	1.65334e-06	EGP08435	up
EGP03182	0.2713	0.2782	0.2665	1.0957	1.7885	1.2809	2.314	1.65432e-06	EGP03182	up
novel.401	1.8387	0.8665	1.0488	4.3118	2.9657	3.0392	1.40819	1.65865e-06	--	up
novel.573	0.5194	0.8238	0.7107	1.4465	2.5924	2.4073	1.61741	1.66809e-06	--	up
EGP28198	1.1132	0.5869	0.6428	2.5359	3.418	2.1465	1.73781	1.76916e-06	EGP28198	up
EGP27005	0.4093	0.4721	1.4032	2.8109	5.8254	3.5076	2.39902	1.81759e-06	EGP27005	up
EGP05238	0.6133	0.3537	0.6363	1.6179	2.2802	1.4781	1.7072	1.82466e-06	EGP05238	up
EGP05822	2.7162	1.7101	0.661	13.1046	8.4106	13.6876	2.74936	1.83949e-06	EGP05822	up
novel.2626	0	0	0	0.1294	1.2764	1.425	6.90242	1.84977e-06	--	up
EGP32219	0.4064	0.375	0.2053	1.5249	2.2292	1.6253	2.3909	1.88006e-06	EGP32219	up
EGP21542	6.9172	10.225	11.6771	23.7123	43.5957	27.5647	1.67981	1.89899e-06	EGP21542	up
EGP09532	2.4452	2.8555	4.3432	5.6445	9.0158	6.3984	1.09108	1.90155e-06	EGP09532	up
EGP14289	0.2916	0.3843	0.4384	1.0744	1.0413	1.1626	1.52651	1.91227e-06	EGP14289	up
EGP25925	57.127	62.149	69.6565	13.3707	24.7924	9.6499	-2.02071	1.91411e-06	EGP25925	down
EGP13007	21.6134	12.7517	7.8748	64.4271	48.4823	63.789	2.0224	1.95826e-06	EGP13007	up
novel.465	0	0	0.0756	1.965	2.211	1.1968	6.16631	1.96246e-06	--	up
EGP31073	0.733	0.6533	0.5471	6.7195	3.4687	1.041	2.49576	2.08635e-06	EGP31073	up
EGP31809	236.515	210.937	184.679	58.4784	111.227	73.924	-1.41411	2.11818e-06	EGP31809	down
EGP12567	0.0573	0.0661	0.0724	0.9406	0.6094	0.9668	3.65138	2.11982e-06	EGP12567	up
EGP12678	0.9798	1.1519	0.595	1.9884	2.3203	3.8385	1.53158	2.1553e-06	EGP12678	up
novel.2313	8.5793	5.4572	5.1635	18.9016	15.8417	13.9495	1.30254	2.25572e-06	--	up
EGP02446	1.4519	1.4813	1.199	3.0446	3.7194	3.0358	1.20368	2.30431e-06	EGP02446	up
EGP27673	24.9749	15.2266	25.0483	85.2368	47.2784	67.1395	1.57118	2.33748e-06	EGP27673	up
EGP08384	5.1363	4.443	4.1284	0.4106	1.0454	1.0212	-2.51124	2.34671e-06	EGP08384	down
EGP14414	0.4321	0.8608	0.4465	2.6254	2.2867	2.0129	1.9583	2.39125e-06	EGP14414	up
EGP20185	6.9197	5.9973	4.4964	2.298	2.6865	2.9993	-1.1704	2.41989e-06	EGP20185	down
novel.1789	4.5478	3.8906	4.641	2.0482	2.4949	1.6938	-1.10443	2.47874e-06	--	down
EGP31047	5.4865	6.8553	2.6949	0.1787	0.853	1.7142	-2.50199	2.48372e-06	EGP31047	down
EGP32252	0.5183	0.7008	0.5869	1.8649	1.7005	1.3624	1.41359	2.50799e-06	EGP32252	up
EGP31061	2.1172	1.6726	1.3554	0.4081	0.5195	0.5437	-1.85222	2.53209e-06	EGP31061	down
EGP05000	3.6848	2.6396	3.9452	1.5358	2.1108	1.3852	-1.06639	2.53764e-06	EGP05000	down
EGP11467	1.0136	1.4401	0.7793	2.4457	2.2692	2.6619	1.14717	2.54437e-06	EGP11467	up
EGP28373	1.8288	1.0738	1.6379	0.3119	0.2978	0.374	-2.25311	2.58941e-06	EGP28373	down
novel.1516	2.1989	1.6071	1.54	0.7148	0.6337	0.2721	-1.75711	2.61812e-06	--	down
EGP23819	4.2664	2.9636	2.8781	7.0488	8.5749	7.0891	1.12081	2.62612e-06	EGP23819	up
EGP31245	0.4108	0.4739	0.1297	2.0473	1.7247	2.5031	2.56299	2.69418e-06	EGP31245	up
EGP13860	3.3528	4.3749	4.1493	1.8664	0.6445	1.5661	-1.58772	2.93486e-06	EGP13860	down
EGP16717	0.7941	1.4829	1.8867	0.2439	0.4233	0.4017	-1.9963	2.93661e-06	EGP16717	down
novel.2082	1.168	0.2571	0.3491	0.0418	0.0599	0.1337	-2.97039	3.05664e-06	--	down
EGP18510	0.9213	1.0626	0.7609	2.1189	2.9948	1.8378	1.30147	3.06225e-06	EGP18510	up
EGP27814	0.8482	0.7285	0.7067	1.7775	2.0405	1.7593	1.2447	3.07268e-06	EGP27814	up
EGP14807	1.7245	1.2085	1.4337	2.9179	3.9832	3.0283	1.14226	3.09034e-06	EGP14807	up
EGP18384	0.1446	0.2669	0.1827	0.2713	2.6553	3.1814	3.32719	3.11584e-06	EGP18384	up
EGP10235	0.6003	0.7859	0.4508	1.636	1.8888	1.4193	1.38679	3.1938e-06	EGP10235	up
EGP29829	0.6266	0.413	0.2261	1.758	1.7035	1.2865	1.84671	3.3892e-06	EGP29829	up
novel.532	2.527	3.1089	2.4683	0.9877	1.1315	0.9685	-1.4297	3.40011e-06	--	down
EGP24703	1.3622	1.4402	2.1028	3.6823	3.8121	5.8165	1.40503	3.43825e-06	EGP24703	up
EGP26377	1.1188	1.1167	1.1686	3.0777	2.9143	2.0705	1.20701	3.45584e-06	EGP26377	up
novel.919	0.438	0.7384	0.2979	2.3309	1.7727	1.8107	1.96016	3.52045e-06	--	up
EGP30314	0.2682	0.4124	0.1411	0.9433	1.3009	1.4244	2.1091	3.55793e-06	EGP30314	up
novel.1663	3.1684	2.5154	1.975	5.0177	6.0342	6.6854	1.16178	3.7533e-06	--	up
EGP22357	1.1838	2.3894	1.0927	0.4805	0.4077	0.2845	-2.0266	3.7921e-06	EGP22357	down
EGP33323	0.3551	0.5939	0.4934	1.7904	1.8485	1.0208	1.66236	3.85225e-06	EGP33323	up
EGP30421	5.1484	5.983	3.547	1.5549	2.3141	2.1935	-1.31718	3.89929e-06	EGP30421	down
EGP08589	1.4566	1.3134	1.338	0.5279	0.2965	0.2317	-1.99749	3.91575e-06	EGP08589	down
EGP00513	1.797	2.293	1.8109	1.0087	0.749	0.7406	-1.27894	4.04809e-06	EGP00513	down
EGP31434	0.9871	0.8538	0.6234	2.4304	2.8729	3.7008	1.81569	4.06612e-06	EGP31434	up
EGP08554	6.6335	8.1769	13.2486	16.285	22.6485	20.5704	1.04819	4.14459e-06	EGP08554	up
EGP26278	0.3897	0.4816	0.4395	1.2077	1.0751	1.2003	1.37259	4.1875e-06	EGP26278	up
EGP24115	1.0274	0.971	0.6849	1.6396	2.4918	2.1935	1.19162	4.31253e-06	EGP24115	up
EGP08571	1.6958	2.186	1.071	0.0585	0.1117	0.374	-3.25526	4.34116e-06	EGP08571	down
EGP10191	0.2646	0.1056	0.1028	0.525	0.6037	0.992	2.09757	4.55191e-06	EGP10191	up
novel.643	5.6065	4.5087	4.6776	2.5933	1.7274	1.2856	-1.4389	4.5954e-06	--	down
EGP23428	1.1589	0.7509	1.0526	2.0459	1.9387	2.376	1.05733	4.63296e-06	EGP23428	up
novel.1561	2.2915	1.222	1.8673	0.4911	0.4689	0.7083	-1.73854	4.64853e-06	--	down
novel.202	5.3817	3.8058	5.0609	2.349	2.0668	2.111	-1.16836	4.70092e-06	--	down
EGP18542	1.2468	1.9678	2.4312	0.3078	0.8325	0.41	-1.89308	5.11314e-06	EGP18542	down
EGP07182	0.3021	0.2613	0.3498	1.0923	0.6905	1.0541	1.59508	5.30484e-06	EGP07182	up
EGP32189	6.368	6.6223	3.5601	10.9347	13.0885	10.0895	1.00061	5.37703e-06	EGP32189	up
EGP28542	0.8016	0.9966	0.526	1.5381	2.1677	1.7044	1.17649	5.46991e-06	EGP28542	up
EGP29458	2.2834	1.6679	1.2978	0.1785	0.5538	0.3329	-2.3375	5.50619e-06	EGP29458	down
EGP29698	1.3232	0.6393	0.1355	0.021	0.04	0.067	-4.09127	5.59569e-06	EGP29698	down
EGP06129	9.081	10.206	8.1463	4.4164	3.1768	6.4806	-1.00757	5.64853e-06	EGP06129	down
EGP09084	0.3147	0.4084	0.3106	0.0807	0.0661	0.0246	-2.61879	5.70832e-06	EGP09084	down
EGP22372	1.2075	1.1274	0.7263	2.0226	3.4437	3.3775	1.48225	6.1044e-06	EGP22372	up
EGP13134	1.6656	1.1961	1.3496	4.2927	2.9199	2.3958	1.147	6.16607e-06	EGP13134	up
EGP15896	0.3878	0.4659	0.4387	1.0987	0.7958	1.0601	1.15383	6.24209e-06	EGP15896	up
novel.297	0.2209	0.0364	0.1196	0.9992	1.0953	0.9467	2.93775	6.36041e-06	--	up
novel.552	0.2781	0.3608	0.3073	0.8967	1.0117	1.2381	1.69529	6.55608e-06	--	up
EGP30068	1.9845	2.612	2.3001	4.4073	6.1156	3.9098	1.03069	6.5879e-06	EGP30068	up
EGP05853	2.0122	2.4765	2.712	1.0646	1.5383	0.8894	-1.07719	6.64059e-06	EGP05853	down
EGP10041	1.3528	1.0402	1.5189	3.2605	3.1971	3.5693	1.31862	6.79253e-06	EGP10041	up
novel.1374	1.1269	0.4926	0.5094	2.5036	1.6068	1.9125	1.44787	6.89902e-06	--	up
EGP16995	2.3887	2.3245	2.9228	5.9078	7.228	4.2913	1.15646	6.94214e-06	EGP16995	up
EGP24021	0.1878	0.1986	0.2175	0.7158	0.5958	1.3303	2.08744	7.00666e-06	EGP24021	up
EGP33178	0.8501	0.926	0.8948	2.5197	2.1412	1.9478	1.2692	7.03195e-06	EGP33178	up
EGP24900	5.3224	5.6986	6.7226	1.9546	3.7772	3.2883	-1.01432	7.03827e-06	EGP24900	down
EGP01402	5.381	4.8676	5.8637	11.0103	14.1732	11.4719	1.1489	7.15363e-06	EGP01402	up
EGP31655	0.3438	0.2644	0.2574	0.9108	0.9979	0.7321	1.56322	7.16992e-06	EGP31655	up
EGP09605	0.4524	0.7917	0.532	1.3354	1.8862	1.5208	1.3831	7.32899e-06	EGP09605	up
EGP18485	0.6575	0.5819	0.4442	1.5238	1.4377	1.2994	1.29154	7.40278e-06	EGP18485	up
EGP02256	46.362	50.2933	69.8865	116.192	184.498	125.444	1.31515	7.56544e-06	EGP02256	up
EGP18341	2.0762	2.0165	1.6217	0.7047	0.7034	0.717	-1.47034	7.58622e-06	EGP18341	down
EGP12843	0.9739	1.1233	1.0456	0.2569	0.0818	0.3347	-2.27876	7.6766e-06	EGP12843	down
novel.247	0.2552	0.107	0.1465	1.1152	0.9349	0.7248	2.38607	7.90446e-06	--	up
EGP30496	0.8985	0.9421	1.0661	2.7137	2.347	2.2119	1.28756	7.94932e-06	EGP30496	up
novel.1367	2.1348	2.1668	1.7796	0.5507	0.5735	0.587	-1.87179	8.03097e-06	--	down
EGP16825	0.4191	1.0203	0.147	4.0399	4.1176	5.3826	3.05308	8.14379e-06	EGP16825	up
novel.1019	0.0294	0.1863	0.1113	0.4476	0.7068	0.8074	2.57085	8.29386e-06	--	up
EGP09203	1.0097	1.1846	0.8795	2.3269	2.1241	2.1321	1.05681	8.52259e-06	EGP09203	up
EGP31350	0.2436	0.3211	0.1319	1.3056	0.818	2.4789	2.66783	8.67745e-06	EGP31350	up
EGP21716	45.9697	33.0062	34.2115	64.9067	97.186	76.9055	1.03869	8.68263e-06	EGP21716	up
EGP33662	0.6062	0.3764	0.5104	1.0023	1.0178	1.4568	1.17251	8.82695e-06	EGP33662	up
EGP30833	1.3462	1.793	0.8097	0.4134	0.3947	0.5007	-1.6378	8.95932e-06	EGP30833	down
EGP30438	40.7082	41.6871	43.1767	14.7759	14.3014	25.8254	-1.23552	9.26569e-06	EGP30438	down
EGP25977	1.5707	0.6039	0.744	5.1413	4.1759	2.8627	2.00106	9.48812e-06	EGP25977	up
EGP00566	0.3517	0.7031	0.7404	2.3368	1.1811	3.0768	1.84445	9.65644e-06	EGP00566	up
EGP00531	2.1024	2.8077	1.6072	4.6707	6.6269	5.6007	1.3328	9.78015e-06	EGP00531	up
EGP03376	2.9851	3.0324	2.0755	1.1239	1.165	1.2322	-1.24484	1.07657e-05	EGP03376	down
EGP27510	379.951	311.518	366.145	116.485	212.148	162.833	-1.14533	1.16128e-05	EGP27510	down
EGP31160	389.239	385.53	365.461	130.281	237.907	175.026	-1.10888	1.1652e-05	EGP31160	down
EGP14716	1.4083	2.1657	1.0376	4.6785	3.6128	6.2335	1.60926	1.16914e-05	EGP14716	up
EGP22770	9.9548	11.873	13.3595	4.775	5.0653	7.9878	-1.02342	1.17055e-05	EGP22770	down
EGP07261	0.1014	0.0878	0.032	0.3866	0.9653	0.9192	3.28802	1.18786e-05	EGP07261	up
EGP33659	1.6993	2.161	1.2933	0.2044	0.7073	0.599	-1.80921	1.31047e-05	EGP33659	down
novel.1168	0.4934	0.6504	0.5342	1.9423	1.8544	1.806	1.70291	1.31919e-05	--	up
novel.1968	0.4997	0.3602	0.2367	2.1972	1.4684	3.2007	2.57884	1.32681e-05	--	up
EGP30858	8.4607	5.9167	8.8439	1.7389	5.0077	2.8562	-1.31127	1.33234e-05	EGP30858	down
EGP09929	0.6029	0.5563	0.2665	1.944	1.3161	2.0344	1.83353	1.33382e-05	EGP09929	up
novel.2186	1.763	1.7	1.6427	4.9815	6.8589	2.4562	1.44848	1.33936e-05	--	up
novel.1148	0.2122	0.367	0.268	1.4096	1.2666	1.3257	2.20871	1.34679e-05	--	up
EGP20009	2.5027	3.3807	1.2246	0.608	1.0096	0.6199	-1.70384	1.35406e-05	EGP20009	down
EGP24084	2.4765	1.8456	1.9249	4.6014	4.1371	4.9521	1.08382	1.37623e-05	EGP24084	up
EGP15267	1.6105	0.9411	1.112	2.8955	2.2596	4.7501	1.38488	1.40285e-05	EGP15267	up
EGP27755	3.8007	3.0402	2.7874	6.9002	7.5485	6.7419	1.09148	1.41879e-05	EGP27755	up
novel.1453	0.1096	0	0.0461	0.4712	1.3088	1.1415	4.12929	1.45165e-05	--	up
EGP11289	0.8211	0.8199	0.6811	1.2502	2.4558	1.8533	1.21886	1.45986e-05	EGP11289	up
EGP02218	0.6096	0.3516	1.0266	3.0974	4.6632	3.3014	2.45486	1.50952e-05	EGP02218	up
EGP33631	0.8271	0.7632	0.7731	0.3103	0.2037	0.1447	-1.87945	1.55914e-05	EGP33631	down
EGP21642	2.9532	4.4507	7.1121	1.6621	1.8513	1.9192	-1.45429	1.56413e-05	EGP21642	down
EGP05706	1.7966	2.774	1.2078	3.8734	4.4765	6.4101	1.3094	1.57736e-05	EGP05706	up
novel.1986	1.034	0.7091	0.7589	1.8676	1.611	1.9558	1.06992	1.61501e-05	--	up
EGP00176	23.3202	16.7424	11.6084	3.4494	7.0431	4.1329	-1.85833	1.61711e-05	EGP00176	down
EGP20722	0.1861	0.1002	0.1567	0.4365	0.5278	1.0855	2.15853	1.6323e-05	EGP20722	up
EGP23955	0.4796	0.6988	0.7015	1.3616	2.3738	1.9245	1.56034	1.63498e-05	EGP23955	up
EGP33826	1.4502	2.1983	1.0728	0.4858	0.6493	0.233	-1.81705	1.63975e-05	EGP33826	down
novel.1969	4.2048	3.9244	3.6338	1.4271	2.3844	2.0398	-1.04738	1.65549e-05	--	down
novel.2032	14.0439	7.7031	2.2673	76.8551	48.4639	80.401	3.05928	1.68038e-05	--	up
novel.1910	1.4651	2.0346	1.8882	3.6109	4.0499	3.6619	1.03808	1.71633e-05	--	up
EGP18952	2.8267	2.4349	0.9491	5.1604	6.0082	5.3215	1.35878	1.74746e-05	EGP18952	up
novel.2591	0.0355	0.1023	0.1569	0.8739	0.6953	0.377	2.72425	1.7551e-05	--	up
EGP24028	0.1638	0.3306	0.1551	0.9601	1.375	1.7398	2.61092	1.78223e-05	EGP24028	up
EGP28433	0.984	1.2381	0.9792	0.0699	0.1001	0.3727	-2.62489	1.79865e-05	EGP28433	down
EGP16338	17.1458	16.3392	16.9709	3.3221	3.4006	8.104	-1.81014	1.8108e-05	EGP16338	down
EGP30049	2.0727	0.8789	1.4245	4.3959	3.8215	3.1998	1.33513	1.85336e-05	EGP30049	up
novel.1126	3.0111	3.9422	3.3921	1.6699	0.8655	1.5256	-1.39315	1.88449e-05	--	down
EGP26552	0.2573	0.2511	0.025	0.7891	0.7312	1.6328	2.49301	1.988e-05	EGP26552	up
EGP11455	0.6882	0.306	0.2723	0.1361	0.0557	0.0725	-2.30904	2.03778e-05	EGP11455	down
EGP23799	0.773	0.8698	1.024	1.7685	2.2372	1.9793	1.13332	2.08696e-05	EGP23799	up
EGP05130	0.3758	0.6285	0.1899	1.1236	1.283	1.7612	1.75554	2.13728e-05	EGP05130	up
EGP19716	11.1209	7.4375	9.2664	25.9054	35.3356	16.7787	1.44819	2.22608e-05	EGP19716	up
EGP01401	5.9906	6.0201	3.1465	11.4055	11.0883	9.859	1.04736	2.27165e-05	EGP01401	up
EGP04218	0.187	0.2157	0.5315	1.9738	2.6696	0.9935	2.5863	2.27849e-05	EGP04218	up
EGP11237	4.9816	3.6492	4.0813	1.7365	1.6579	1.0937	-1.53995	2.28976e-05	EGP11237	down
EGP21245	0.1639	0.162	0.2957	1.0432	0.7077	1.0534	2.14806	2.35811e-05	EGP21245	up
novel.1235	0.1345	0.0517	0.0283	0.6836	0.4769	0.7006	3.01826	2.3973e-05	--	up
novel.1912	3.7801	2.8612	3.2825	1.5236	1.5428	1.1811	-1.26358	2.4074e-05	--	down
EGP31721	0.2543	0.3802	0.1784	0.6295	1.4761	0.6827	1.74007	2.42226e-05	EGP31721	up
EGP00423	0.3453	0.354	0.0485	1.3046	1.4173	1.4864	2.41982	2.44257e-05	EGP00423	up
EGP22168	2.8122	3.3071	2.9251	6.8532	5.9257	6.1332	1.02539	2.64283e-05	EGP22168	up
EGP20927	4.1321	7.2017	8.2925	1.0228	3.5463	0.9181	-1.86807	2.7906e-05	EGP20927	down
EGP02518	1.4622	1.5953	1.0482	3.4289	3.0967	3.556	1.24876	2.80475e-05	EGP02518	up
EGP10909	1.059	1.1536	1.5606	2.6215	2.6016	4.8531	1.37906	2.80593e-05	EGP10909	up
EGP05747	1.9314	2.0296	2.2768	0.8303	1.2011	0.7241	-1.21107	2.83618e-05	EGP05747	down
EGP28340	0.3637	0.2937	0.1838	0.6682	0.7329	1.7426	1.84746	2.85623e-05	EGP28340	up
EGP31916	3.6159	2.7623	2.9657	0.6057	1.4193	1.1738	-1.58676	2.8639e-05	EGP31916	down
novel.535	1.9951	2.3616	2.7852	1.1286	1.1363	1.3998	-1.00162	2.89407e-05	--	down
EGP24229	1.0066	1.1082	1.2136	2.2531	2.2535	2.7446	1.08588	2.92446e-05	EGP24229	up
EGP24061	0.061	0.0703	0.1198	0.2144	0.963	0.254	2.48788	2.99511e-05	EGP24061	up
EGP16209	3.2212	4.0173	2.117	0.7677	1.5831	1.3419	-1.38069	3.02649e-05	EGP16209	down
EGP30228	5.0324	4.4648	4.0432	18.3649	51.9338	12.5972	2.57724	3.02955e-05	EGP30228	up
EGP11285	2.5666	2.3167	2.4806	1.0729	1.0993	0.251	-1.63513	3.1678e-05	EGP11285	down
EGP08932	0.8818	0.678	0.8043	3.159	2.9063	1.8979	1.71127	3.17063e-05	EGP08932	up
EGP25736	2.6065	4.1197	2.7638	1.0942	1.4409	1.5282	-1.26303	3.19541e-05	EGP25736	down
EGP27880	0.1521	0.1754	0.1017	0.4931	0.3906	0.5479	1.68744	3.2093e-05	EGP27880	up
EGP32309	0.4212	0.6316	0.3724	1.3088	1.5325	1.2634	1.48733	3.30227e-05	EGP32309	up
EGP21192	0.4649	0.3264	0.4979	0.711	1.2106	1.5158	1.37319	3.64856e-05	EGP21192	up
EGP10851	12.3424	29.7739	23.9137	1.7061	5.9788	1.8185	-2.83318	3.67562e-05	EGP10851	down
EGP10654	9.4932	10.1024	4.1837	1.9419	1.1086	2.646	-2.10296	3.77191e-05	EGP10654	down
EGP30776	0.6812	1.1659	0.7772	2.2932	1.6482	2.7738	1.31608	3.84045e-05	EGP30776	up
EGP11161	0.6484	0.8054	0.819	2.6317	2.2334	2.4934	1.66096	3.88319e-05	EGP11161	up
EGP13885	2.2031	2.9319	3.1572	6.4578	5.9757	4.7653	1.02078	3.93985e-05	EGP13885	up
EGP31178	0.9167	0.5639	0.3088	1.7675	1.7559	1.7057	1.48783	4.00433e-05	EGP31178	up
EGP33825	1.9751	1.4343	1.5708	5.7468	4.3401	4.1141	1.46504	4.0708e-05	EGP33825	up
EGP20210	0.5003	0.3174	0.4107	1.2905	1.4001	1.2192	1.6237	4.109e-05	EGP20210	up
EGP00985	2.5101	2.3988	2.8081	5.1296	5.941	7.7083	1.24277	4.15603e-05	EGP00985	up
EGP10985	7.8093	7.4556	7.0792	4.1621	4.8102	2.2415	-1.02995	4.15758e-05	EGP10985	down
novel.604	3.027	3.5584	3.4557	1.5016	2.0527	1.4186	-1.04777	4.17185e-05	--	down
EGP13993	1.1609	0.746	1.1939	0.3306	0.4084	0.3731	-1.5194	4.18294e-05	EGP13993	down
EGP00403	2.2445	2.5633	2.6959	1.1352	1.4533	0.605	-1.26333	4.20369e-05	EGP00403	down
EGP07512	1.4173	2.1282	0.912	0.6898	0.5837	0.4679	-1.39452	4.27693e-05	EGP07512	down
EGP33363	0.2678	0.0562	0.1845	0.8565	0.8449	0.9129	2.30132	4.2966e-05	EGP33363	up
EGP19001	2.0819	1.808	0.9281	0.4595	0.5758	0.551	-1.64785	4.44558e-05	EGP19001	down
EGP07144	2.0693	2.0944	2.0003	0.5447	0.78	1.2667	-1.2969	4.47097e-05	EGP07144	down
EGP04997	2.3677	3.9348	3.3765	1.5523	1.6245	1.5273	-1.07654	4.51971e-05	EGP04997	down
EGP09657	158.992	177.773	99.8765	62.8667	83.1352	69.0843	-1.05991	4.54059e-05	EGP09657	down
EGP30343	0.568	0.4716	0.7461	1.2786	1.9582	1.6752	1.42643	4.54627e-05	EGP30343	up
EGP30841	56.7195	53.2182	42.5529	92.7962	85.6654	137.538	1.0104	4.64596e-05	EGP30841	up
EGP10245	2.3576	2.7192	1.9852	0.9982	0.6598	1.4186	-1.24716	4.6891e-05	EGP10245	down
novel.1807	2.018	0.8001	0.9558	4.5105	6.6359	2.8373	1.8368	4.73242e-05	--	up
EGP28553	1.143	1.3183	0.693	2.9484	2.4567	3.9998	1.5247	4.81003e-05	EGP28553	up
EGP30198	4.4328	4.1069	3.9468	0.7668	1.871	1.5439	-1.6171	4.82757e-05	EGP30198	down
EGP20449	0.2513	0.1561	0.0977	1.0199	0.9088	0.4832	2.19437	4.84447e-05	EGP20449	up
EGP21833	1.0002	1.5047	0.7964	0.2804	0.2677	0.4348	-1.79513	5.23743e-05	EGP21833	down
EGP14750	1.9115	1.795	1.5384	0.6942	0.6249	1.0993	-1.1657	5.28491e-05	EGP14750	down
EGP10718	0.2087	0.3209	0.593	1.1622	1.2069	1.1084	1.61283	5.35012e-05	EGP10718	up
EGP06723	0.6596	0.9682	1.5147	4.2183	4.5643	2.2481	1.79193	5.54969e-05	EGP06723	up
EGP25325	0.1629	0.3416	0.3367	0.8508	1.2267	0.6848	1.69397	5.64822e-05	EGP25325	up
EGP04393	0.6537	1.4002	1.0616	2.6279	3.5021	2.9761	1.51991	5.80454e-05	EGP04393	up
novel.4	5.1341	4.578	4.9589	2.6811	2.6563	1.2941	-1.17991	5.80812e-05	--	down
EGP02720	0.4516	0.5208	0.6844	1.8002	1.9714	2.0316	1.78003	5.81201e-05	EGP02720	up
EGP32367	3.0901	4.3641	2.29	1.2016	2.1002	1.1231	-1.17433	5.8335e-05	EGP32367	down
EGP14156	0.4091	0.5082	0.9938	1.9926	1.5501	2.7139	1.68509	6.12026e-05	EGP14156	up
EGP31090	1.8373	2.6489	0.838	0.2394	0.2857	0.4465	-2.50426	6.13621e-05	EGP31090	down
EGP18195	1.1534	1.101	0.4521	2.0519	2.1074	2.154	1.17308	6.31985e-05	EGP18195	up
EGP30381	15.6715	23.0734	11.4452	6.5698	11.2217	7.6592	-1.01691	6.32943e-05	EGP30381	down
EGP30844	0.659	0.3257	0.2775	0.7359	1.4403	5.6868	2.58167	6.33198e-05	EGP30844	up
novel.1124	0.5087	0.3772	0.4589	1.7041	1.2202	1.9072	1.79739	6.33368e-05	--	up
EGP19523	1.5771	1.0914	0.7968	2.7906	2.8569	2.6519	1.20659	6.35236e-05	EGP19523	up
EGP06649	21.4202	14.9862	17.8639	5.8937	3.3283	8.8892	-1.62628	6.55586e-05	EGP06649	down
novel.1551	1.5409	1.5753	1.4154	0.5749	0.3528	0.4814	-1.72992	6.65316e-05	--	down
novel.358	0.8172	0.5075	0.7146	1.3759	2.5802	1.5974	1.40425	6.96118e-05	--	up
novel.1749	1.7991	1.0294	0.7832	4.2795	2.8921	3.4871	1.51959	7.10032e-05	--	up
EGP26771	1.6482	1.9538	1.0987	3.221	5.074	3.7193	1.31054	7.29846e-05	EGP26771	up
EGP19721	0.0778	0.0641	0.0702	0.2868	0.3485	0.389	2.22611	7.41374e-05	EGP19721	up
EGP18265	0.8855	1.1826	1.0596	0.3825	0.5217	0.3495	-1.35116	7.60683e-05	EGP18265	down
novel.939	4.1366	5.1226	3.6299	2.5528	1.706	1.7414	-1.14355	7.65993e-05	--	down
EGP26511	0.5871	0.7273	0.4394	1.7336	1.1683	1.8478	1.39025	7.67272e-05	EGP26511	up
EGP06739	1.4842	0.9586	1.4247	2.2971	3.489	3.2646	1.18458	7.87927e-05	EGP06739	up
novel.2143	1.715	1.2061	2.5359	4.463	4.1673	4.1298	1.19188	8.00828e-05	--	up
EGP29742	0.8066	0.4739	0.3268	1.3027	1.6185	1.3314	1.34834	8.05876e-05	EGP29742	up
EGP30256	22.9699	16.2533	14.0969	65.5634	35.1782	41.8805	1.37856	8.20694e-05	EGP30256	up
EGP09848	1.3575	1.1183	1.9595	3.6949	4.1789	3.2719	1.29859	8.28122e-05	EGP09848	up
EGP29483	0.2687	0.3522	0.5091	1.0169	1.2306	0.748	1.38153	8.33787e-05	EGP29483	up
EGP14371	2.1426	1.0484	1.8862	4.4917	4.6517	4.463	1.37636	8.36711e-05	EGP14371	up
EGP02973	0.6102	0.475	0.6744	1.252	1.349	1.3536	1.12943	8.44211e-05	EGP02973	up
EGP13526	4.1705	2.1485	1.8612	4.8899	6.6916	6.7757	1.11755	8.51046e-05	EGP13526	up
EGP30584	0.5914	0.6063	0.6224	2.3883	1.8388	1.3139	1.56945	8.56488e-05	EGP30584	up
EGP30697	2.1946	2.0413	2.3248	5.2294	5.2304	5.0431	1.20189	8.5873e-05	EGP30697	up
novel.554	6.5323	36.4845	0.7146	0.0603	0.2879	0	-6.99033	8.62456e-05	--	down
EGP09354	0.6455	0.3384	0.4447	1.8576	2.102	2.1267	2.03556	8.70187e-05	EGP09354	up
EGP04760	3.2124	3.3749	5.7045	5.7803	13.9924	9.0629	1.19456	8.72552e-05	EGP04760	up
EGP11081	0.9721	1.0957	0.4744	0.1295	0.2226	0.2485	-2.12787	8.7843e-05	EGP11081	down
EGP07103	0.9996	1.0337	0.8925	1.6571	1.9486	2.4771	1.0119	9.20705e-05	EGP07103	up
novel.1614	2.9056	2.8942	3.5448	1.5486	1.1458	1.7744	-1.10735	9.32728e-05	--	down
EGP30253	1.186	1.5807	1.3649	0.5872	0.4131	0.4941	-1.50705	9.39129e-05	EGP30253	down
EGP19885	0.7536	0.8234	0.5343	0.186	0.3404	0.1322	-1.7112	9.80365e-05	EGP19885	down
EGP28558	0.4897	0.3975	0.3207	0.8081	0.8121	4.0347	2.17721	9.87613e-05	EGP28558	up
EGP00889	2.5374	2.7715	1.3796	0.7487	1.1663	1.092	-1.19515	9.93865e-05	EGP00889	down
EGP25786	0.4425	0.1985	0.4658	1.5566	1.0458	1.1368	1.71403	0.000103466	EGP25786	up
EGP13519	1.4837	1.4764	1.7638	0.7675	0.2443	0.8181	-1.4159	0.000105061	EGP13519	down
EGP00301	4.0093	4.1375	4.3977	1.2371	1.5354	1.0549	-1.74594	0.000105252	EGP00301	down
EGP27696	2.2799	1.7531	2.0461	1.0552	0.8731	1.1497	-1.02728	0.00010558	EGP27696	down
EGP32311	2.2951	2.3635	1.3666	0.9995	1.0093	0.9834	-1.05308	0.000113836	EGP32311	down
EGP30057	1.9272	3.184	3.2237	0.855	1.2828	1.5298	-1.22262	0.000115953	EGP30057	down
EGP16048	3.9432	6.7378	2.9884	0.7877	1.8965	2.4093	-1.46525	0.000116094	EGP16048	down
EGP13992	1.351	1.3677	1.3651	0.6688	0.6553	0.7504	-1.0189	0.000116403	EGP13992	down
EGP33734	0.218	0.32	0.2503	1.0922	0.7987	0.7431	1.7058	0.000117103	EGP33734	up
EGP18582	0.8213	1.3569	1.7663	2.4205	3.2552	3.1348	1.13018	0.000117762	EGP18582	up
EGP05527	2.0123	1.5473	2.2158	4.4164	5.2561	3.6756	1.17228	0.000118527	EGP05527	up
EGP28106	0.1349	0.2074	0.0795	0.4955	0.3926	0.4832	1.65308	0.000119931	EGP28106	up
EGP25668	0.5707	0.6582	0.5691	1.6904	1.2777	2.2522	1.49409	0.000120386	EGP25668	up
EGP29623	0.7634	0.7815	0.9642	0.3419	0.5185	0.3216	-1.11841	0.000122695	EGP29623	down
EGP03397	0.275	0.262	0.3021	0.5608	0.8433	0.8369	1.37897	0.000127593	EGP03397	up
EGP16881	12.7879	18.0661	8.1365	3.372	6.0738	4.5765	-1.5129	0.000131437	EGP16881	down
EGP16590	1.3289	1.4889	0.8153	2.404	3.4428	3.2267	1.27349	0.000132056	EGP16590	up
EGP26074	1.8966	1.6666	0.7985	0.3706	0.3033	0.2822	-2.23486	0.000134518	EGP26074	down
EGP31574	0.5571	0.7594	0.4691	1.92	1.2472	1.2237	1.25694	0.000136103	EGP31574	up
EGP02792	0.9879	1.508	1.3211	0.3066	0.2602	0.581	-1.78205	0.00014088	EGP02792	down
novel.1550	3.8728	3.787	2.7648	0.5923	1.6022	0.4209	-2.01986	0.000144222	--	down
EGP00187	1.5238	1.4922	0.9078	0.1685	0.2897	0.6108	-1.93111	0.000147308	EGP00187	down
EGP20781	0.8291	1.0979	1.2024	2.1603	2.5094	2.4945	1.16357	0.000149425	EGP20781	up
EGP16589	1.1241	0.8334	0.862	2.2123	2.966	2.2577	1.35372	0.000149474	EGP16589	up
EGP16279	0	0.0882	0.1932	0.8518	12.6258	2.1024	5.78143	0.000149591	EGP16279	up
EGP22347	0.9993	0.6328	0.2475	1.6082	1.9083	1.9591	1.48483	0.000150541	EGP22347	up
EGP31216	32.5373	46.011	18.5806	7.4561	11.6032	13.0337	-1.63599	0.000151823	EGP31216	down
EGP31650	179.749	159.021	152.766	46.5789	99.3691	61.2909	-1.28462	0.000152018	EGP31650	down
EGP03250	1.2093	1.1468	0.5431	2.4261	4.0009	1.78	1.45669	0.00015344	EGP03250	up
EGP12507	0.0948	0.1913	0.2544	0.4863	0.7694	0.548	1.72163	0.000155835	EGP12507	up
EGP03477	0.982	2.1668	1.7796	0.1001	0.3824	0.587	-2.24847	0.000156212	EGP03477	down
EGP31078	1.891	1.521	2.1685	0.7877	0.8078	0.9329	-1.18333	0.000156388	EGP31078	down
EGP00141	0.1488	0.2529	0.1484	0.4133	0.5611	0.509	1.39419	0.000156474	EGP00141	up
EGP27167	0.1652	0.2722	0.3875	1.2451	0.9246	0.7963	1.82839	0.000158581	EGP27167	up
EGP03320	1.7691	2.1954	2.1214	1.0765	0.9275	1.0635	-1.02735	0.000161451	EGP03320	down
novel.81	5.0559	5.0623	3.8245	1.8892	1.8347	3.4371	-1.00835	0.00016146	--	down
EGP13595	1.7698	1.6602	1.9374	0.6917	0.951	0.8553	-1.14147	0.000162145	EGP13595	down
EGP18842	0.8292	0.9564	0.8902	2.7223	1.9957	2.3835	1.36902	0.000162943	EGP18842	up
EGP13426	2.0345	1.5772	0.9689	0.352	0.0747	0.6252	-2.18483	0.00016444	EGP13426	down
EGP01043	1.2295	1.5179	1.4436	0.5888	0.7948	0.5843	-1.12452	0.00016615	EGP01043	down
EGP29940	2.675	1.5741	4.0682	8.1292	7.2723	5.0488	1.26363	0.000166249	EGP29940	up
EGP12626	0.4097	0.6164	0.36	1.0234	1.4357	1.1354	1.33638	0.000170626	EGP12626	up
EGP05598	0.324	0.6036	1.2275	1.8408	1.7853	3.3012	1.65717	0.000172242	EGP05598	up
EGP10615	0.211	0.1328	0.1575	0.5736	0.4724	0.4196	1.49899	0.00018586	EGP10615	up
EGP19430	0.4953	0.5713	0.4171	0.8954	1.6635	1.496	1.40877	0.000186199	EGP19430	up
EGP10724	3.5856	3.8366	4.0378	1.7729	2.0795	1.9976	-1.00811	0.000188255	EGP10724	down
novel.2090	1.6698	1.9259	2.8924	0.6713	0.7477	0.7155	-1.63781	0.000188443	--	down
EGP27512	0.4652	0.3156	0.2074	0.9305	1.3784	1.1627	1.75346	0.00019497	EGP27512	up
EGP25423	0.3155	0.283	0.5314	1.5209	1.0203	1.5335	1.82137	0.000208058	EGP25423	up
novel.2067	2.4023	0.3754	1.3311	0.4543	0.3643	0.2324	-2.00816	0.0002091	--	down
EGP20678	1.2144	0.8489	0.8367	2.1791	1.6273	2.2997	1.02361	0.000209495	EGP20678	up
EGP17008	1.8425	1.5111	0.4654	2.9284	3.6209	4.7588	1.51041	0.000210392	EGP17008	up
EGP06782	2.4938	2.7325	2.2049	0.8041	0.2094	1.0129	-1.93117	0.000212733	EGP06782	down
EGP12687	3.3873	2.4507	4.0062	1.7692	1.3789	1.7703	-1.043	0.000220657	EGP12687	down
EGP09678	20.3906	26.3083	37.1043	57.1369	76.7473	54.1525	1.12603	0.000224264	EGP09678	up
EGP13934	1.5084	1.6886	1.8492	0.6242	0.4966	0.499	-1.67659	0.000227754	EGP13934	down
novel.2165	0.4294	0.4952	0.4519	2.1816	2.4834	1.5204	2.13363	0.000228094	--	up
EGP26499	1.2278	1.4406	1.2567	0.6702	0.5924	0.3175	-1.34538	0.00023983	EGP26499	down
EGP31080	2.8807	1.6452	0.8125	0.4591	0.5636	0.6292	-1.74024	0.000249945	EGP31080	down
EGP30489	2.7009	4.5077	3.3512	0.1863	0.2312	1.0722	-2.87166	0.000252103	EGP30489	down
EGP04312	3.8625	3.7461	3.1045	8.1313	6.3874	8.3379	1.04656	0.00025777	EGP04312	up
EGP22956	6.3146	6.6861	6.4068	3.7627	2.2017	2.1993	-1.28866	0.000260046	EGP22956	down
EGP01206	4.8648	5.0873	7.2507	15.4962	33.3468	11.9572	1.78285	0.000262192	EGP01206	up
EGP10930	2.4863	4.1294	2.1983	0.6997	1.1133	1.3672	-1.51309	0.000262736	EGP10930	down
EGP07332	1.4872	1.6823	1.0115	0.7378	0.2241	0.2502	-1.82801	0.000276861	EGP07332	down
EGP31056	0.166	0.2075	0.0699	0.8112	0.4182	0.4842	1.89662	0.000278385	EGP31056	up
EGP16591	1.626	0.9554	0.9687	2.3382	3.2626	2.6072	1.15914	0.000284004	EGP16591	up
EGP19984	3.7267	3.3933	3.7161	2.4148	1.7565	1.0214	-1.09749	0.00028477	EGP19984	down
EGP15833	9.2584	21.1195	20.0964	6.1113	8.2913	10.1995	-1.07587	0.000284826	EGP15833	down
EGP18749	1.4559	1.3521	1.2419	0.3547	0.6773	0.7325	-1.24189	0.000287527	EGP18749	down
novel.1987	5.1854	8.3999	4.489	2.8692	1.6305	3.3495	-1.24855	0.000288171	--	down
EGP33175	0.5497	0.4692	0.3333	1.1087	1.0585	0.8107	1.09137	0.000288554	EGP33175	up
EGP31011	1.1947	1.2303	0.6467	0.2752	0.406	0.3733	-1.58624	0.00029212	EGP31011	down
novel.916	35.7706	53.6419	27.3041	13.1687	21.1643	12.2322	-1.36288	0.000295754	--	down
EGP00789	1.4244	0.92	1.4033	0.6848	0.6219	0.3382	-1.22407	0.000301629	EGP00789	down
EGP26802	0.6142	0.9209	0.8274	2.2083	8.2959	2.3794	2.41219	0.000304316	EGP26802	up
EGP10221	0.7453	1.2417	0.6799	2.2819	1.9005	3.312	1.44758	0.000307814	EGP10221	up
EGP14291	13.8501	13.121	14.4146	34.3844	87.2643	28.9543	1.82573	0.00031049	EGP14291	up
EGP02277	5.9955	5.0884	4.2865	11.6722	9.1176	11.0274	1.0009	0.000314154	EGP02277	up
novel.86	0.9144	1.125	1.078	3.2165	2.6614	2.7427	1.43205	0.000314814	--	up
EGP21008	135.162	182.544	77.2688	23.7196	57.7942	38.2528	-1.75839	0.000315433	EGP21008	down
EGP26239	0.2187	0.1765	0.1933	0.4871	0.6609	0.4782	1.425	0.000330286	EGP26239	up
EGP06781	2.1102	1.8659	1.2882	0.9485	0.3543	0.3956	-1.67592	0.00033205	EGP06781	down
EGP30199	2.4161	2.9801	2.7126	0.8656	1.3147	1.6356	-1.12917	0.000348028	EGP30199	down
EGP21822	0.41	0.912	0.7768	2.0604	1.377	2.2693	1.41212	0.000348754	EGP21822	up
novel.2634	0.2825	0.1504	0.4117	0.8917	0.827	1.0319	1.6701	0.000348948	--	up
EGP14352	1.8204	2.0996	1.3796	0.7471	0.4076	0.91	-1.41043	0.000350886	EGP14352	down
EGP02943	2.9666	2.8651	0.4515	10.2257	18.9253	13.4902	2.72546	0.000363008	EGP02943	up
EGP19607	2.4729	1.9363	3.0088	14.0984	26.6155	4.2814	2.56278	0.000365723	EGP19607	up
EGP05021	0.958	0.904	1.1733	2.4847	2.0797	2.0316	1.08415	0.000368179	EGP05021	up
EGP30113	0.8994	0.9855	0.7952	2.5837	2.3661	2.0233	1.33847	0.000373558	EGP30113	up
EGP19228	0.5911	0.6377	0.578	0.2124	0.3415	0.2502	-1.20403	0.000378678	EGP19228	down
EGP29257	1.0712	0.8791	1.2229	0.3623	0.2767	0.5664	-1.44514	0.000379782	EGP29257	down
novel.1262	0.6449	0.8988	0.2376	1.733	1.5342	1.8807	1.47972	0.000387074	--	up
EGP14515	1.1375	1.1529	1.1538	0.4042	0.0965	0.6247	-1.66744	0.000402977	EGP14515	down
novel.1135	4.3569	4.068	2.4458	1.2974	1.7806	0.7779	-1.53039	0.000418568	--	down
EGP20750	1.4935	1.3637	1.4934	0.5472	0.3483	0.7388	-1.46254	0.000421443	EGP20750	down
EGP21651	0.619	0.649	0.4264	1.7814	1.5118	2.813	1.79669	0.000441609	EGP21651	up
novel.36	0.1604	0.6012	0.4052	1.1283	1.4363	1.9042	1.91485	0.00044693	--	up
novel.1780	0.6496	0.7975	0.6087	1.3513	2.2753	1.2832	1.21975	0.000448322	--	up
EGP21712	1.501	1.7705	1.3357	3.2798	2.4821	3.8796	1.02074	0.000448806	EGP21712	up
EGP08799	0.6679	0.1988	0.4082	1.4398	0.9164	1.5886	1.5724	0.000457005	EGP08799	up
EGP29987	0.4954	1.4603	0.5562	2.2591	3.0195	2.8207	1.65567	0.00046174	EGP29987	up
EGP19646	0.6243	0.512	0.4731	0.1789	0.1242	0.2427	-1.61274	0.000466223	EGP19646	down
novel.1041	0.9981	1.214	0.7793	0.3192	0.1219	0.5443	-1.6568	0.000467191	--	down
novel.332	2.1701	2.2915	1.7759	1.2902	0.6501	0.8022	-1.2287	0.000472232	--	down
EGP30925	2.9876	2.1058	2.306	0.9731	0.6813	1.1063	-1.47277	0.00047609	EGP30925	down
EGP21647	0.3314	0.4247	0.1395	1.2521	1.69	0.7823	2.00735	0.000480082	EGP21647	up
EGP10752	0.1332	0.1792	0.4486	0.7808	0.9442	0.9432	1.79778	0.00048546	EGP10752	up
EGP00957	9.5905	9.9653	12.4409	3.0392	7.4474	4.9671	-1.08486	0.000491452	EGP00957	down
EGP10837	0.3138	0.6936	0.6605	0.9504	2.0196	1.928	1.52714	0.00050265	EGP10837	up
novel.312	2.0383	2.8603	1.888	0.8365	0.8366	1.3162	-1.22838	0.000509179	--	down
EGP10931	2.7837	3.2616	1.7859	0.4663	1.1871	1.2149	-1.49189	0.000512527	EGP10931	down
EGP18822	0.3224	0.7437	0.2036	1.2475	1.3354	1.7327	1.72189	0.000528211	EGP18822	up
novel.1821	1.8704	2.2435	2.1262	0.9649	0.7538	1.0285	-1.22562	0.000528696	--	down
novel.989	0.3173	0.3202	0	1.3021	0.8436	1.2887	2.35117	0.000533838	--	up
EGP30855	0.658	0.7114	0.4934	0.1688	0.1381	0.2313	-1.84208	0.000537051	EGP30855	down
EGP19649	20.3832	16.4565	4.4411	64.0508	52.4803	61.7112	2.07142	0.0005447	EGP19649	up
EGP28526	1.9421	1.792	2.453	6.8315	4.8916	4.2476	1.33385	0.000552168	EGP28526	up
novel.1275	1.8151	1.6652	1.4589	0.4837	0.6003	0.7218	-1.49774	0.000553462	--	down
EGP13251	3.1455	3.2982	3.5269	1.6173	0.8285	2.5227	-1.05118	0.00056777	EGP13251	down
novel.1155	0.3998	0.4099	0.7856	1.3543	1.7903	1.9987	1.66492	0.000577587	--	up
novel.857	2.3258	1.7195	1.2052	4.1954	4.139	3.8756	1.16394	0.00060606	--	up
novel.1875	0.3634	0.489	0.2678	1.0653	0.9153	1.6653	1.6538	0.00061529	--	up
EGP06406	0.3068	0.2359	0.1579	0.6262	0.5724	0.6107	1.31304	0.000623064	EGP06406	up
EGP30725	1.1571	1.1677	0.9134	0.3731	0.4857	0.2169	-1.62179	0.000628928	EGP30725	down
EGP13773	0.3565	0.2227	0.1876	0.749	0.6319	0.7426	1.41107	0.000635631	EGP13773	up
EGP05675	39.6944	3.6654	47.5618	3.7965	3.4904	2.9975	-3.18734	0.000641761	EGP05675	down
novel.2073	1.902	4.1624	2.2791	0.5718	1.5286	0.5485	-1.68198	0.000681491	--	down
EGP02928	0.9736	1.6389	0.9306	2.53	3.2402	1.9732	1.09242	0.000692945	EGP02928	up
EGP30495	0.7315	0.7383	1.2127	2.3051	2.0472	2.5713	1.33787	0.000701227	EGP30495	up
EGP13727	0.202	0.1398	0.319	0.4737	0.5427	0.7322	1.37034	0.000715539	EGP13727	up
EGP13955	4.3868	2.8383	3.0632	2.3	1.3574	1.4263	-1.06146	0.000725649	EGP13955	down
novel.2207	0.0618	0.3209	0.1757	0.4168	1.6955	0.4829	2.19463	0.000725902	--	up
novel.757	6.4858	4.7359	1.7681	18.1363	11.9874	16.2405	1.79515	0.000726434	--	up
EGP31367	0.472	0.8437	0.4471	1.2451	2.2189	1.2092	1.37219	0.000752424	EGP31367	up
EGP18095	1.5767	2.0847	2.2344	0.7215	1.0332	0.6729	-1.31047	0.0007596	EGP18095	down
EGP02151	1.5502	1.7879	1.7276	4.2233	4.1342	2.5642	1.07391	0.000780102	EGP02151	up
EGP21655	0.6491	1.1765	0.7808	1.5947	2.9411	1.9315	1.27884	0.000783024	EGP21655	up
novel.1585	5.8431	4.6038	4.9202	0.9868	0.0808	0.0601	-3.80963	0.000788115	--	down
EGP00786	3.2561	3.1984	1.2428	0.5454	1.3819	1.2521	-1.31603	0.000789423	EGP00786	down
EGP33757	536.023	579.337	785.341	240.014	405.601	216.977	-1.17966	0.000791731	EGP33757	down
EGP21626	0.8622	1.5272	1.1668	2.2747	2.6199	2.5785	1.03839	0.000792599	EGP21626	up
EGP26381	1.9768	1.5861	1.1399	3.2249	3.127	3.7059	1.04407	0.000799848	EGP26381	up
novel.1049	2.2059	1.8919	1.9289	0.3316	0.6332	0.9896	-1.67473	0.000819321	--	down
EGP33452	2.1363	1.5722	1.1821	0.7395	0.5011	0.9917	-1.18322	0.000819825	EGP33452	down
EGP09360	0.1278	0.2947	0.2689	0.5992	1.3348	1.3306	2.21927	0.000828318	EGP09360	up
EGP28561	19.4907	22.3398	7.4161	3.2182	6.3589	5.167	-1.77695	0.000845346	EGP28561	down
novel.666	0.7556	0.4926	0.7469	1.7527	1.1952	1.2728	1.03869	0.000860714	--	up
EGP15006	0.1385	0.2395	0.1749	0.5682	0.6394	0.5408	1.63008	0.000880328	EGP15006	up
EGP33822	1.1938	0.654	0.6785	2.3796	1.7039	1.9395	1.19885	0.000880431	EGP33822	up
EGP03112	2.9687	1.7337	1.329	3.9215	5.6369	3.6632	1.08348	0.000882903	EGP03112	up
EGP30839	2.9046	3.1961	1.6868	3.2491	5.905	8.0112	1.09581	0.000893626	EGP30839	up
EGP15762	0.7848	0.7077	0.2343	4.35	4.0572	1.1413	2.42749	0.000931922	EGP15762	up
EGP00768	53.2551	43.0549	49.0851	155.153	79.054	87.4459	1.1043	0.000947581	EGP00768	up
EGP28539	0.1814	0.4184	0.3054	1.4532	1.049	0.68	1.78883	0.000954413	EGP28539	up
EGP18717	1.7936	1.993	1.0222	0.4873	0.5387	1.0114	-1.28855	0.000957811	EGP18717	down
EGP29382	0.8626	0.5863	0.3113	1.4449	1.1209	1.5594	1.1723	0.00096292	EGP29382	up
EGP04964	0.887	0.9378	0.6536	1.2423	2.9789	1.8168	1.2443	0.000998576	EGP04964	up
EGP19460	0.6477	0.6896	0.4615	0.8374	1.4874	1.9097	1.18912	0.0010095	EGP19460	up
EGP10223	0.4431	0.3651	0.2399	0.8536	1.6299	0.989	1.67816	0.00102444	EGP10223	up
EGP13173	0.9195	0.4242	0.6968	3.2345	3.4997	0.996	1.87788	0.00103799	EGP13173	up
EGP28430	1.0832	1.0863	0.5948	2.5953	4.0593	1.4714	1.51272	0.00104818	EGP28430	up
EGP11586	0.8992	0.9018	0.8395	1.9253	2.2758	1.9544	1.18081	0.00105158	EGP11586	up
EGP05880	3.7299	2.6512	5.0398	1.6273	2.2334	1.7345	-1.0653	0.00105858	EGP05880	down
EGP18457	14.9305	18.1509	30.5078	54.5391	100.248	45.6096	1.61572	0.00106785	EGP18457	up
EGP24557	1.8683	1.3921	0.9606	0.7173	0.5367	0.8059	-1.08474	0.00110898	EGP24557	down
novel.2196	3.4128	2.1425	1.5278	0.8105	0.9672	1.0798	-1.35889	0.00111443	--	down
EGP02814	0.1964	0.4649	0.47	0.921	1.1107	0.6459	1.21762	0.00112422	EGP02814	up
novel.497	0.4948	0.7989	0.5416	1.3536	1.6985	1.6077	1.30866	0.00112684	--	up
EGP18561	1.132	1.3579	1.8873	3.9288	2.7878	2.8861	1.10324	0.00113514	EGP18561	up
EGP20638	4.1204	4.2358	2.7153	2.1006	2.1057	1.2314	-1.0638	0.00113708	EGP20638	down
novel.331	1.6112	1.3846	1.4165	1.0372	0.7427	0.4738	-1.00712	0.00113926	--	down
novel.1469	0.8472	1.1167	0.6115	2.1995	2.5741	2.42	1.43749	0.00113931	--	up
EGP16456	0.118	0.2041	0.2359	0.4841	0.4621	0.4668	1.31639	0.00115273	EGP16456	up
novel.204	1.7064	2.1471	1.7635	1.0186	0.9725	0.6592	-1.1181	0.00116156	--	down
[truncated: 195 more rows]
