# Supplementary material for: Genome-Wide Analysis of R2R3-MYB Genes and Functional Characterization of SmMYB75 in Eggplant Fruit Implications for Crop Improvement and Nutritional Enhancement
Source: Int J Mol Sci. 2024 Jan 18;25(2):1163. doi: 10.3390/ijms25021163 (PMC10816229; doi:10.3390/ijms25021163)
Supplement: Supplementary file 1 [file ijms-25-01163-s001.zip › Table S6.xlsx]

## Sheet: Supplementary Table S6
Supplementary Table S6. KEGG classification enrichment of DEGs.
KEGG_pathway	ko_id	Cluster_frequency	P-value	count	GeneID	Up_gene	Up	Down_gene	Down
Anthocyanin biosynthesis	ko00942	3 out of 810 0.37037037037037%	0.102757	3	EGP21564;EGP26887;EGP26892	EGP21564;EGP26887	2	EGP26892	1
Flavonoid biosynthesis	ko00941	24 out of 810 2.96296296296296%	3.63492e-05	24	EGP30923;EGP24021;EGP13151;EGP31350;EGP31351;EGP24362;EGP24232;EGP22200;EGP22347;EGP18904;EGP05412;EGP21179;EGP26201;EGP32043;EGP25937;EGP32103;EGP01163;EGP15267;EGP32177;EGP07114;EGP07113;EGP16393;EGP31016;EGP32037	EGP30923;EGP24021;EGP13151;EGP31350;EGP31351;EGP24362;EGP24232;EGP22200;EGP22347;EGP18904;EGP05412;EGP21179;EGP26201;EGP25937;EGP32103;EGP15267;EGP32177;EGP07114;EGP31016;EGP32037	20	EGP32043;EGP01163;EGP07113;EGP16393	4
Flavone and flavonol biosynthesis	ko00944	5 out of 810 0.617283950617284%	0.00432516	5	EGP07114;EGP07113;EGP16393;EGP32037;EGP25741	EGP07114;EGP32037;EGP25741	3	EGP07113;EGP16393	2
alpha-Linolenic acid metabolism	ko00592	27 out of 810 3.33333333333333%	4.26695e-08	27	EGP02536;EGP09644;EGP12316;novel.332;novel.1009;EGP02151;EGP03376;EGP26802;EGP26804;EGP26805;EGP28561;EGP28658;EGP31080;EGP33690;EGP29783;EGP09605;EGP30362;EGP31367;EGP31366;EGP21903;EGP30385;EGP30387;EGP29927;EGP30355;EGP16881;EGP14516;EGP27863	EGP02536;EGP02151;EGP26802;EGP26804;EGP26805;EGP33690;EGP29783;EGP09605;EGP30362;EGP31367;EGP31366;EGP21903;EGP30385;EGP30387;EGP29927;EGP30355;EGP14516;EGP27863	18	EGP09644;EGP12316;novel.332;novel.1009;EGP03376;EGP28561;EGP28658;EGP31080;EGP16881	9
Biosynthesis of secondary metabolites	ko01110	261 out of 810 32.2222222222222%	6.24158e-08	261	EGP13615;EGP18952;EGP09193;EGP19001;EGP30785;EGP16251;EGP08711;EGP22706;EGP28180;EGP28179;EGP12546;EGP10384;EGP19228;EGP13435;EGP31128;EGP02536;EGP19307;EGP20044;EGP31475;EGP32505;EGP30489;EGP19460;EGP19462;EGP19467;EGP06080;EGP23698;EGP02792;EGP06065;EGP30989;EGP30562;EGP30890;EGP27988;novel.757;novel.864;EGP09644;EGP12316;novel.332;novel.1009;EGP30923;EGP24021;EGP13151;EGP31350;EGP31351;EGP2436…	EGP13615;EGP18952;EGP09193;EGP30785;EGP16251;EGP08711;EGP22706;EGP28179;EGP12546;EGP13435;EGP31128;EGP02536;EGP19307;EGP32505;EGP19460;EGP19467;EGP06080;EGP23698;EGP06065;EGP30562;EGP27988;novel.757;novel.864;EGP30923;EGP24021;EGP13151;EGP31350;EGP31351;EGP24362;EGP06838;EGP04894;EGP00684;EGP30776;EGP32309;EGP18393;EGP20992;EGP31807;EGP10435;EGP21245;EGP31472;EGP02151;EGP03220;EGP13233;EGP03077;E…	183	EGP19001;EGP28180;EGP10384;EGP19228;EGP20044;EGP31475;EGP30489;EGP19462;EGP02792;EGP30989;EGP30890;EGP09644;EGP12316;novel.332;novel.1009;EGP26178;EGP26176;EGP05874;EGP26180;novel.433;EGP20638;EGP02387;EGP25924;EGP25925;EGP32311;EGP03376;EGP31706;EGP28121;EGP11386;EGP05946;novel.312;EGP24324;EGP28561;EGP20623;EGP30833;EGP33758;EGP13921;EGP11294;EGP30616;EGP00925;EGP28658;EGP31050;EGP10888;EGP1909…	78
MAPK signaling pathway - plant	ko04016	64 out of 810 7.90123456790123%	1.20617e-05	64	EGP10435;EGP31594;EGP10221;EGP21442;EGP21162;EGP28812;EGP16338;EGP13046;EGP05062;EGP00603;EGP06781;EGP00566;EGP29966;EGP14326;EGP15736;EGP15730;EGP15739;EGP00403;EGP12857;EGP33410;EGP29971;EGP15727;novel.1823;novel.469;novel.471;novel.646;novel.993;EGP28298;EGP32675;EGP16978;EGP26518;EGP31216;EGP17750;EGP14254;EGP29985;EGP01378;EGP18750;EGP06195;EGP06199;EGP18709;EGP17805;EGP27427;EGP24656;EGP134…	EGP10435;EGP10221;EGP21442;EGP21162;EGP28812;EGP05062;EGP00566;EGP29966;EGP14326;EGP12857;EGP33410;EGP29971;novel.1823;novel.469;novel.471;novel.646;novel.993;EGP28298;EGP32675;EGP16978;EGP29985;EGP01378;EGP18750;EGP06195;EGP06199;EGP18709;EGP27427;EGP24656;EGP13468;EGP09355;EGP33483;EGP30844;EGP30841;EGP05468;EGP30839;EGP33477;EGP05598;EGP12788;EGP20060;EGP14807;EGP13970;EGP13971	42	EGP31594;EGP16338;EGP13046;EGP00603;EGP06781;EGP15736;EGP15730;EGP15739;EGP00403;EGP15727;EGP26518;EGP31216;EGP17750;EGP14254;EGP17805;EGP17200;EGP10076;EGP31362;EGP00884;EGP00889;EGP00176;EGP21024	22
Flavonoid biosynthesis	ko00941	24 out of 810 2.96296296296296%	3.63492e-05	24	EGP30923;EGP24021;EGP13151;EGP31350;EGP31351;EGP24362;EGP24232;EGP22200;EGP22347;EGP18904;EGP05412;EGP21179;EGP26201;EGP32043;EGP25937;EGP32103;EGP01163;EGP15267;EGP32177;EGP07114;EGP07113;EGP16393;EGP31016;EGP32037	EGP30923;EGP24021;EGP13151;EGP31350;EGP31351;EGP24362;EGP24232;EGP22200;EGP22347;EGP18904;EGP05412;EGP21179;EGP26201;EGP25937;EGP32103;EGP15267;EGP32177;EGP07114;EGP31016;EGP32037	20	EGP32043;EGP01163;EGP07113;EGP16393	4
Plant-pathogen interaction	ko04626	111 out of 810 13.7037037037037%	9.12676e-05	111	EGP07045;EGP31594;EGP10221;EGP21442;EGP21162;EGP14712;EGP11141;EGP23481;EGP26674;EGP30314;EGP15275;EGP06294;EGP21154;EGP03048;novel.1877;EGP16338;EGP13046;EGP05062;EGP00603;EGP06781;EGP00566;EGP29966;EGP14326;EGP15736;EGP15730;EGP15739;EGP00403;EGP12857;EGP33410;EGP29971;EGP15727;novel.1823;novel.469;novel.471;novel.646;novel.993;EGP17750;EGP14254;EGP29985;EGP10776;EGP29761;EGP26023;EGP28216;EGP1…	EGP10221;EGP21442;EGP21162;EGP14712;EGP11141;EGP26674;EGP30314;EGP15275;EGP21154;EGP03048;EGP05062;EGP00566;EGP29966;EGP14326;EGP12857;EGP33410;EGP29971;novel.1823;novel.469;novel.471;novel.646;novel.993;EGP29985;EGP10776;EGP29761;EGP26023;EGP28216;EGP30020;EGP21655;EGP31806;EGP18377;EGP12845;EGP01378;EGP18750;EGP14435;EGP05286;EGP06195;EGP06199;EGP23797;EGP23799;EGP23798;EGP07254;EGP23787;EGP029…	69	EGP07045;EGP31594;EGP23481;EGP06294;novel.1877;EGP16338;EGP13046;EGP00603;EGP06781;EGP15736;EGP15730;EGP15739;EGP00403;EGP15727;EGP17750;EGP14254;EGP16715;EGP18386;EGP30381;EGP08843;EGP00302;EGP31809;EGP09385;EGP22223;EGP09381;novel.507;novel.643;EGP09391;EGP16102;EGP05992;EGP12319;EGP25447;novel.1585;EGP26191;EGP21008;EGP17200;EGP11081;EGP18717;EGP15597;EGP07396;EGP32325;EGP16085	42
Stilbenoid, diarylheptanoid and gingerol biosynthesis	ko00945	16 out of 810 1.97530864197531%	0.000508773	16	EGP24021;EGP13151;EGP31350;EGP31351;EGP05412;EGP21179;EGP26201;EGP32043;EGP25937;EGP32103;EGP01163;EGP15267;EGP32177;EGP26824;EGP10837;EGP26701	EGP24021;EGP13151;EGP31350;EGP31351;EGP05412;EGP21179;EGP26201;EGP25937;EGP32103;EGP15267;EGP32177;EGP26824;EGP10837;EGP26701	14	EGP32043;EGP01163	2
Biosynthesis of various alkaloids	ko00996	6 out of 810 0.740740740740741%	0.00117567	6	EGP18867;EGP01201;EGP14291;EGP14292;EGP01205;EGP16825	EGP01201;EGP14291;EGP14292;EGP01205;EGP16825	5	EGP18867	1
Phenylpropanoid biosynthesis	ko00940	34 out of 810 4.19753086419753%	0.00120369	34	EGP22706;EGP06080;EGP23698;EGP02792;EGP06065;EGP30989;EGP30562;EGP30890;EGP27988;novel.757;novel.864;EGP24021;EGP13151;EGP31350;EGP31351;EGP10904;EGP29426;EGP10888;EGP05412;EGP21179;EGP24622;novel.2017;EGP12317;EGP26201;EGP32043;EGP25937;EGP32103;EGP01163;EGP15267;EGP32177;EGP21833;EGP16631;EGP09863;EGP30172	EGP22706;EGP06080;EGP23698;EGP06065;EGP30562;EGP27988;novel.757;novel.864;EGP24021;EGP13151;EGP31350;EGP31351;EGP10904;EGP29426;EGP05412;EGP21179;EGP24622;EGP26201;EGP25937;EGP32103;EGP15267;EGP32177;EGP16631;EGP09863;EGP30172	25	EGP02792;EGP30989;EGP30890;EGP10888;novel.2017;EGP12317;EGP32043;EGP01163;EGP21833	9
Linoleic acid metabolism	ko00591	8 out of 810 0.987654320987654%	0.00277991	8	EGP09644;EGP12316;novel.332;novel.1009;EGP02151;EGP03376;EGP05633;EGP20723	EGP02151;EGP05633;EGP20723	3	EGP09644;EGP12316;novel.332;novel.1009;EGP03376	5
Metabolic pathways	ko01100	394 out of 810 48.641975308642%	0.00318712	394	EGP13615;EGP18952;EGP19001;EGP28168;EGP28172;EGP28170;EGP28171;EGP16589;EGP09253;EGP30785;EGP16251;EGP19786;EGP08711;EGP22706;EGP19572;EGP28180;EGP28179;EGP12546;EGP10384;EGP19228;EGP05624;novel.186;EGP13435;EGP31128;EGP02536;EGP19307;EGP31475;EGP06370;EGP32505;EGP30489;EGP19460;EGP19462;EGP19467;EGP15874;EGP24576;EGP15777;novel.2591;EGP06080;EGP23698;EGP02792;EGP06065;EGP30989;EGP30562;EGP30890;…	EGP13615;EGP18952;EGP16589;EGP30785;EGP16251;EGP19786;EGP08711;EGP22706;EGP28179;EGP12546;EGP05624;novel.186;EGP13435;EGP31128;EGP02536;EGP19307;EGP06370;EGP32505;EGP19460;EGP19467;EGP15874;EGP24576;EGP15777;novel.2591;EGP06080;EGP23698;EGP06065;EGP30562;EGP27988;novel.757;novel.864;EGP20781;EGP07193;EGP07192;EGP28764;EGP31655;EGP30923;EGP24021;EGP13151;EGP31350;EGP31351;EGP24362;EGP21822;EGP0683…	275	EGP19001;EGP28168;EGP28172;EGP28170;EGP28171;EGP09253;EGP19572;EGP28180;EGP10384;EGP19228;EGP31475;EGP30489;EGP19462;EGP02792;EGP30989;EGP30890;EGP09644;EGP12316;novel.332;novel.1009;EGP30034;EGP26178;EGP26176;EGP05874;EGP26180;novel.433;EGP12073;EGP20638;EGP00488;novel.37;EGP02387;EGP25924;EGP25925;EGP32311;EGP08919;EGP03376;EGP22353;EGP31936;EGP33659;EGP09617;EGP31706;EGP28121;EGP20657;EGP24051…	119
Glycerophospholipid metabolism	ko00564	25 out of 810 3.08641975308642%	0.00423562	25	EGP09193;EGP31472;EGP02151;EGP03376;EGP03077;EGP29483;EGP13773;EGP13822;EGP08897;EGP05132;EGP30915;EGP21712;EGP32421;EGP29783;EGP09605;EGP30362;EGP31367;EGP31366;EGP21903;EGP30385;EGP30387;EGP29927;EGP30355;EGP16881;EGP03182	EGP09193;EGP31472;EGP02151;EGP03077;EGP29483;EGP13773;EGP13822;EGP08897;EGP05132;EGP21712;EGP32421;EGP29783;EGP09605;EGP30362;EGP31367;EGP31366;EGP21903;EGP30385;EGP30387;EGP29927;EGP30355;EGP03182	22	EGP03376;EGP30915;EGP16881	3
Flavone and flavonol biosynthesis	ko00944	5 out of 810 0.617283950617284%	0.00432516	5	EGP07114;EGP07113;EGP16393;EGP32037;EGP25741	EGP07114;EGP32037;EGP25741	3	EGP07113;EGP16393	2
Steroid biosynthesis	ko00100	8 out of 810 0.987654320987654%	0.00462966	8	EGP13435;EGP31128;EGP29901;EGP12959;EGP30228;EGP18943;EGP15709;EGP30737	EGP13435;EGP31128;EGP29901;EGP12959;EGP30228;EGP18943;EGP15709;EGP30737	8	--	0
Glycosphingolipid biosynthesis - ganglio series	ko00604	9 out of 810 1.11111111111111%	0.00569641	9	EGP02965;EGP33632;EGP13989;EGP10720;EGP00669;EGP31068;EGP18355;EGP04733;EGP31975	EGP13989;EGP10720;EGP00669;EGP31068;EGP18355;EGP04733	6	EGP02965;EGP33632;EGP31975	3
Galactose metabolism	ko00052	23 out of 810 2.83950617283951%	0.00844865	23	EGP30776;EGP02387;EGP25924;EGP25925;EGP20449;EGP11386;novel.358;EGP10709;EGP02965;EGP33632;EGP13989;EGP10720;EGP00669;EGP31068;EGP18355;EGP04733;EGP31975;EGP18090;novel.1235;novel.1800;novel.805;EGP04557;EGP31011	EGP30776;EGP20449;novel.358;EGP13989;EGP10720;EGP00669;EGP31068;EGP18355;EGP04733;EGP18090;novel.1235;novel.805;EGP04557	13	EGP02387;EGP25924;EGP25925;EGP11386;EGP10709;EGP02965;EGP33632;EGP31975;novel.1800;EGP31011	10
Ascorbate and aldarate metabolism	ko00053	20 out of 810 2.46913580246914%	0.00879973	20	EGP18952;EGP19572;EGP10384;EGP19228;EGP15874;EGP24576;EGP15777;novel.2591;EGP07193;EGP07192;EGP24115;EGP16137;EGP12460;EGP18090;novel.1235;novel.1800;novel.805;EGP31207;EGP01990;EGP25951	EGP18952;EGP15874;EGP24576;EGP15777;novel.2591;EGP07193;EGP07192;EGP24115;EGP16137;EGP18090;novel.1235;novel.805;EGP31207;EGP01990;EGP25951	15	EGP19572;EGP10384;EGP19228;EGP12460;novel.1800	5
Other glycan degradation	ko00511	12 out of 810 1.48148148148148%	0.00949779	12	EGP12843;EGP12842;EGP10631;EGP02965;EGP33632;EGP13989;EGP10720;EGP00669;EGP31068;EGP18355;EGP04733;EGP31975	EGP10631;EGP13989;EGP10720;EGP00669;EGP31068;EGP18355;EGP04733	7	EGP12843;EGP12842;EGP02965;EGP33632;EGP31975	5
Glycosaminoglycan degradation	ko00531	10 out of 810 1.23456790123457%	0.011276	10	EGP13760;EGP02965;EGP33632;EGP13989;EGP10720;EGP00669;EGP31068;EGP18355;EGP04733;EGP31975	EGP13760;EGP13989;EGP10720;EGP00669;EGP31068;EGP18355;EGP04733	7	EGP02965;EGP33632;EGP31975	3
Isoflavonoid biosynthesis	ko00943	8 out of 810 0.987654320987654%	0.0124943	8	EGP23810;EGP16582;EGP16583;novel.1986;novel.2386;EGP02169;EGP28430;EGP31314	EGP23810;EGP16582;EGP16583;novel.1986;novel.2386;EGP02169;EGP28430;EGP31314	8	--	0
Pyruvate metabolism	ko00620	21 out of 810 2.59259259259259%	0.0165153	21	EGP13615;EGP18952;EGP19001;EGP16251;EGP19786;EGP28180;EGP28179;EGP12546;EGP10384;EGP19228;EGP32505;EGP25953;EGP10670;EGP16604;EGP26463;EGP30838;EGP30833;EGP25884;EGP14516;EGP27863;EGP30705	EGP13615;EGP18952;EGP16251;EGP19786;EGP28179;EGP12546;EGP32505;EGP25953;EGP10670;EGP16604;EGP26463;EGP30838;EGP25884;EGP14516;EGP27863;EGP30705	16	EGP19001;EGP28180;EGP10384;EGP19228;EGP30833	5
Biosynthesis of various plant secondary metabolites	ko00999	14 out of 810 1.72839506172839%	0.0258346	14	EGP05448;EGP30616;EGP09953;EGP32252;EGP04332;EGP28552;EGP28553;EGP28555;EGP01200;EGP01206;EGP29864;EGP19187;EGP19186;EGP06277	EGP05448;EGP09953;EGP32252;EGP04332;EGP28552;EGP28553;EGP28555;EGP01200;EGP01206;EGP29864;EGP19187;EGP19186;EGP06277	13	EGP30616	1
Arachidonic acid metabolism	ko00590	6 out of 810 0.740740740740741%	0.0280399	6	EGP20781;EGP02151;EGP03376;EGP15977;EGP16620;EGP28036	EGP20781;EGP02151;EGP15977;EGP28036	4	EGP03376;EGP16620	2
Tyrosine metabolism	ko00350	12 out of 810 1.48148148148148%	0.0341849	12	EGP13615;EGP28180;EGP28179;EGP12546;EGP19307;EGP30489;EGP19460;EGP19462;EGP19467;EGP00684;EGP14516;EGP27863	EGP13615;EGP28179;EGP12546;EGP19307;EGP19460;EGP19467;EGP00684;EGP14516;EGP27863	9	EGP28180;EGP30489;EGP19462	3
Pentose and glucuronate interconversions	ko00040	39 out of 810 4.81481481481481%	0.0370391	39	EGP18952;EGP22353;EGP15975;EGP02033;EGP31936;EGP11373;EGP33659;EGP09616;EGP09617;EGP07337;EGP30962;EGP07298;EGP04541;EGP05701;EGP00235;EGP00234;EGP14793;EGP20657;EGP24051;EGP05249;EGP20210;novel.1262;novel.2400;novel.337;EGP22915;EGP16225;EGP24557;EGP26085;EGP13071;EGP11447;EGP28326;EGP02708;EGP18090;novel.1235;novel.1800;novel.805;EGP31207;EGP01990;EGP25951	EGP18952;EGP15975;EGP02033;EGP11373;EGP09616;EGP07337;EGP30962;EGP07298;EGP04541;EGP05701;EGP00235;EGP00234;EGP14793;EGP20210;novel.1262;novel.2400;novel.337;EGP22915;EGP16225;EGP26085;EGP13071;EGP11447;EGP02708;EGP18090;novel.1235;novel.805;EGP31207;EGP01990;EGP25951	29	EGP22353;EGP31936;EGP33659;EGP09617;EGP20657;EGP24051;EGP05249;EGP24557;EGP28326;novel.1800	10
Glycolysis / Gluconeogenesis	ko00010	31 out of 810 3.82716049382716%	0.0396858	31	EGP13615;EGP18952;EGP19001;EGP28180;EGP28179;EGP12546;EGP10384;EGP19228;EGP05624;novel.186;EGP32505;EGP30776;EGP02387;EGP25924;EGP25925;EGP32309;EGP32311;EGP18393;EGP20992;EGP17870;EGP25953;novel.1374;novel.312;EGP23032;EGP09430;EGP28107;EGP26463;EGP30838;EGP30833;EGP14516;EGP27863	EGP13615;EGP18952;EGP28179;EGP12546;EGP05624;novel.186;EGP32505;EGP30776;EGP32309;EGP18393;EGP20992;EGP17870;EGP25953;novel.1374;EGP23032;EGP09430;EGP28107;EGP26463;EGP30838;EGP14516;EGP27863	21	EGP19001;EGP28180;EGP10384;EGP19228;EGP02387;EGP25924;EGP25925;EGP32311;novel.312;EGP30833	10
Brassinosteroid biosynthesis	ko00905	5 out of 810 0.617283950617284%	0.0483354	5	EGP10718;EGP31050;EGP31512;EGP00513;EGP21347	EGP10718;EGP31512	2	EGP31050;EGP00513;EGP21347	3
Arginine and proline metabolism	ko00330	10 out of 810 1.23456790123457%	0.048674	10	EGP10384;EGP19228;EGP31475;EGP28764;EGP31655;EGP32188;EGP04413;EGP33631;EGP12760;EGP01191	EGP28764;EGP31655;EGP32188;EGP04413;EGP12760;EGP01191	6	EGP10384;EGP19228;EGP31475;EGP33631	4
Plant hormone signal transduction	ko04075	59 out of 810 7.28395061728395%	0.0522296	59	EGP16338;EGP13046;EGP27167;EGP10253;EGP16713;EGP05062;EGP00603;EGP06781;EGP28298;EGP32675;EGP16978;EGP26518;EGP31216;EGP06195;EGP06199;EGP09657;EGP06847;EGP20561;EGP33452;EGP06582;EGP32116;EGP07473;EGP29957;EGP28473;EGP14445;EGP15937;EGP16692;EGP31950;EGP29698;EGP10981;EGP10982;EGP28710;EGP06529;EGP30939;EGP06545;novel.2203;EGP23800;EGP14253;EGP14289;EGP30078;EGP31048;EGP09638;EGP24145;EGP24144;E…	EGP27167;EGP10253;EGP16713;EGP05062;EGP28298;EGP32675;EGP16978;EGP06195;EGP06199;EGP29957;EGP28473;EGP15937;EGP16692;EGP31950;EGP10981;EGP28710;EGP30939;EGP14253;EGP14289;EGP09638;EGP24145;EGP24144;EGP00995;EGP18709;EGP27427;EGP24656;EGP26007;EGP16572;EGP13468;EGP09355	30	EGP16338;EGP13046;EGP00603;EGP06781;EGP26518;EGP31216;EGP09657;EGP06847;EGP20561;EGP33452;EGP06582;EGP32116;EGP07473;EGP14445;EGP29698;EGP10982;EGP06529;EGP06545;novel.2203;EGP23800;EGP30078;EGP31048;EGP20714;EGP14719;EGP15686;EGP17805;EGP11409;EGP31398;EGP15862	29
Circadian rhythm - plant	ko04712	14 out of 810 1.72839506172839%	0.0679794	14	EGP24362;EGP19716;EGP31292;EGP26526;EGP30688;EGP26667;EGP26174;EGP23840;EGP10195;EGP11285;EGP08589;EGP10220;EGP29940;EGP20185	EGP24362;EGP19716;EGP31292;EGP26667;EGP26174;EGP23840;EGP10195;EGP29940	8	EGP26526;EGP30688;EGP11285;EGP08589;EGP10220;EGP20185	6
Protein processing in endoplasmic reticulum	ko04141	35 out of 810 4.32098765432099%	0.0720048	35	EGP09440;EGP03217;EGP33185;EGP32427;EGP32423;EGP13276;EGP18133;novel.929;EGP14712;EGP11141;EGP18339;EGP11089;EGP07150;EGP19475;EGP15275;novel.1268;EGP23937;EGP30458;EGP26858;EGP10055;EGP04116;EGP32463;EGP10536;EGP32189;EGP19015;EGP11586;EGP18095;EGP03112;EGP30625;EGP20002;EGP10410;EGP09623;EGP05897;novel.239;novel.702	EGP09440;EGP03217;EGP33185;EGP32427;EGP32423;EGP13276;EGP18133;EGP14712;EGP11141;EGP18339;EGP11089;EGP07150;EGP19475;EGP15275;novel.1268;EGP30458;EGP26858;EGP10055;EGP10536;EGP32189;EGP19015;EGP11586;EGP03112;EGP20002;EGP10410;EGP09623;EGP05897;novel.239;novel.702	29	novel.929;EGP23937;EGP04116;EGP32463;EGP18095;EGP30625	6
Amino sugar and nucleotide sugar metabolism	ko00520	32 out of 810 3.95061728395062%	0.0725454	32	EGP04665;novel.1839;novel.2273;novel.37;EGP21245;EGP24061;EGP02557;novel.2210;EGP30944;EGP21838;EGP24115;EGP16137;EGP18090;novel.1235;novel.1800;novel.805;EGP32052;EGP08658;EGP10319;EGP24851;EGP06244;EGP32972;EGP06071;EGP31207;EGP01990;EGP25951;EGP33483;EGP30844;EGP30841;EGP05468;EGP30839;EGP33477	EGP04665;novel.1839;novel.2273;EGP21245;EGP24061;EGP02557;novel.2210;EGP30944;EGP21838;EGP24115;EGP16137;EGP18090;novel.1235;novel.805;EGP32052;EGP08658;EGP10319;EGP24851;EGP06244;EGP06071;EGP31207;EGP01990;EGP25951;EGP33483;EGP30844;EGP30841;EGP05468;EGP30839;EGP33477	29	novel.37;novel.1800;EGP32972	3
Sphingolipid metabolism	ko00600	10 out of 810 1.23456790123457%	0.0764637	10	EGP10709;EGP02965;EGP33632;EGP13989;EGP10720;EGP00669;EGP31068;EGP18355;EGP04733;EGP31975	EGP13989;EGP10720;EGP00669;EGP31068;EGP18355;EGP04733	6	EGP10709;EGP02965;EGP33632;EGP31975	4
Ether lipid metabolism	ko00565	6 out of 810 0.740740740740741%	0.080222	6	EGP31472;EGP02151;EGP03376;EGP03077;EGP29483;EGP05132	EGP31472;EGP02151;EGP03077;EGP29483;EGP05132	5	EGP03376	1
Diterpenoid biosynthesis	ko00904	7 out of 810 0.864197530864197%	0.0813406	7	novel.1952;EGP33758;EGP04887;EGP13921;EGP30604;EGP26966;EGP11294	novel.1952;EGP04887;EGP30604;EGP26966	4	EGP33758;EGP13921;EGP11294	3
Fatty acid degradation	ko00071	11 out of 810 1.35802469135802%	0.101368	11	EGP13615;EGP28180;EGP28179;EGP12546;EGP10384;EGP19228;EGP02536;EGP06406;EGP33690;EGP14516;EGP27863	EGP13615;EGP28179;EGP12546;EGP02536;EGP06406;EGP33690;EGP14516;EGP27863	8	EGP28180;EGP10384;EGP19228	3
Anthocyanin biosynthesis	ko00942	3 out of 810 0.37037037037037%	0.102757	3	EGP21564;EGP26887;EGP26892	EGP21564;EGP26887	2	EGP26892	1
Zeatin biosynthesis	ko00908	10 out of 810 1.23456790123457%	0.130403	10	EGP20044;EGP21306;EGP08909;EGP24326;EGP09200;EGP09203;EGP11179;EGP28165;EGP31178;EGP24299	EGP21306;EGP08909;EGP09200;EGP09203;EGP28165;EGP31178;EGP24299	7	EGP20044;EGP24326;EGP11179	3
Aflatoxin biosynthesis	ko00254	1 out of 810 0.123456790123457%	0.130449	1	EGP25884	EGP25884	1	--	0
beta-Alanine metabolism	ko00410	8 out of 810 0.987654320987654%	0.131958	8	EGP10384;EGP19228;EGP02536;EGP19307;EGP02960;EGP33631;EGP12760;EGP01191	EGP02536;EGP19307;EGP02960;EGP12760;EGP01191	5	EGP10384;EGP19228;EGP33631	3
ABC transporters	ko02010	16 out of 810 1.97530864197531%	0.132949	16	EGP13727;EGP13728;EGP30061;EGP26318;EGP30057;EGP09666;EGP13537;EGP11455;EGP07310;EGP05421;EGP30049;novel.1328;EGP24496;EGP08786;EGP27883;EGP13201	EGP13727;EGP13728;EGP30061;EGP13537;EGP07310;EGP05421;EGP30049;novel.1328;EGP27883	9	EGP26318;EGP30057;EGP09666;EGP11455;EGP24496;EGP08786;EGP13201	7
Alanine, aspartate and glutamate metabolism	ko00250	9 out of 810 1.11111111111111%	0.145426	9	EGP04894;EGP04665;novel.1839;novel.2273;novel.37;EGP02960;EGP15762;EGP01212;EGP33757	EGP04894;EGP04665;novel.1839;novel.2273;EGP02960;EGP15762	6	novel.37;EGP01212;EGP33757	3
Biosynthesis of nucleotide sugars	ko01250	21 out of 810 2.59259259259259%	0.15384	21	EGP07193;EGP07192;EGP04665;novel.1839;novel.2273;novel.37;EGP21245;EGP30944;EGP21838;EGP24115;EGP16137;EGP18090;novel.1235;novel.1800;novel.805;EGP32052;EGP08658;EGP10319;EGP31207;EGP01990;EGP25951	EGP07193;EGP07192;EGP04665;novel.1839;novel.2273;EGP21245;EGP30944;EGP21838;EGP24115;EGP16137;EGP18090;novel.1235;novel.805;EGP32052;EGP08658;EGP10319;EGP31207;EGP01990;EGP25951	19	novel.37;novel.1800	2
Butanoate metabolism	ko00650	5 out of 810 0.617283950617284%	0.161894	5	EGP02960;EGP30838;EGP30833;EGP01212;EGP33757	EGP02960;EGP30838	2	EGP30833;EGP01212;EGP33757	3
Glucosinolate biosynthesis	ko00966	3 out of 810 0.37037037037037%	0.200121	3	EGP16108;EGP16106;novel.2410	novel.2410	1	EGP16108;EGP16106	2
Inositol phosphate metabolism	ko00562	13 out of 810 1.60493827160494%	0.206069	13	EGP07193;EGP07192;EGP10869;EGP08919;EGP03077;EGP09430;EGP22648;novel.1068;EGP12460;EGP21716;EGP18485;EGP18265;EGP19170	EGP07193;EGP07192;EGP10869;EGP03077;EGP09430;EGP22648;EGP21716;EGP18485	8	EGP08919;novel.1068;EGP12460;EGP18265;EGP19170	5
Glycosylphosphatidylinositol (GPI)-anchor biosynthesis	ko00563	5 out of 810 0.617283950617284%	0.233908	5	EGP19430;EGP31495;EGP27673;novel.1391;novel.1503	EGP19430;EGP31495;EGP27673;novel.1391;novel.1503	5	--	0
Valine, leucine and isoleucine degradation	ko00280	10 out of 810 1.23456790123457%	0.239985	10	EGP28168;EGP28172;EGP28170;EGP28171;EGP16589;EGP09253;EGP10384;EGP19228;EGP32505;EGP13176	EGP16589;EGP32505;EGP13176	3	EGP28168;EGP28172;EGP28170;EGP28171;EGP09253;EGP10384;EGP19228	7
RNA degradation	ko03018	20 out of 810 2.46913580246914%	0.240065	20	EGP30776;EGP02387;EGP25924;EGP25925;EGP25786;EGP16873;EGP30711;EGP10724;EGP32182;novel.1100;novel.1101;novel.1527;novel.1529;novel.1729;novel.2251;novel.2252;novel.607;novel.1560;EGP33762;EGP16430	EGP30776;EGP25786;EGP16873;novel.1100;novel.1101;novel.1529;novel.2251;novel.2252;novel.607;novel.1560	10	EGP02387;EGP25924;EGP25925;EGP30711;EGP10724;EGP32182;novel.1527;novel.1729;EGP33762;EGP16430	10
Glutathione metabolism	ko00480	11 out of 810 1.35802469135802%	0.253796	11	EGP08711;EGP20781;EGP18102;EGP30699;EGP21727;EGP00488;EGP04760;EGP18113;EGP30709;EGP33526;EGP11464	EGP08711;EGP20781;EGP18102;EGP30699;EGP21727;EGP04760;EGP18113;EGP30709;EGP33526;EGP11464	10	EGP00488	1
Limonene and pinene degradation	ko00903	2 out of 810 0.246913580246914%	0.268842	2	EGP10384;EGP19228	--	0	EGP10384;EGP19228	2
Glyoxylate and dicarboxylate metabolism	ko00630	12 out of 810 1.48148148148148%	0.313192	12	EGP16251;EGP32505;EGP19038;novel.1884;EGP10670;EGP26463;EGP30838;EGP30833;EGP21129;EGP28812;EGP18158;EGP21666	EGP16251;EGP32505;EGP19038;EGP10670;EGP26463;EGP30838;EGP21129;EGP28812;EGP21666	9	novel.1884;EGP30833;EGP18158	3
Folate biosynthesis	ko00790	4 out of 810 0.493827160493827%	0.31436	4	EGP09169;EGP22956;EGP30744;EGP18890	EGP09169;EGP30744	2	EGP22956;EGP18890	2
Cyanoamino acid metabolism	ko00460	7 out of 810 0.864197530864197%	0.33869	7	EGP05448;EGP30616;EGP09953;EGP05229;EGP06377;EGP25898;EGP25899	EGP05448;EGP09953;EGP05229;EGP25898;EGP25899	5	EGP30616;EGP06377	2
Carotenoid biosynthesis	ko00906	10 out of 810 1.23456790123457%	0.344933	10	EGP19099;EGP31370;novel.1254;EGP19362;novel.2626;EGP00076;EGP28478;EGP19389;EGP20936;EGP19751	novel.1254;novel.2626;EGP28478	3	EGP19099;EGP31370;EGP19362;EGP00076;EGP19389;EGP20936;EGP19751	7
Histidine metabolism	ko00340	3 out of 810 0.37037037037037%	0.349135	3	EGP10384;EGP19228;EGP16209	--	0	EGP10384;EGP19228;EGP16209	3
Tropane, piperidine and pyridine alkaloid biosynthesis	ko00960	7 out of 810 0.864197530864197%	0.349863	7	EGP19307;EGP24362;EGP00684;EGP08887;EGP25668;EGP13079;novel.797	EGP19307;EGP24362;EGP00684;EGP08887;EGP25668;EGP13079;novel.797	7	--	0
Isoquinoline alkaloid biosynthesis	ko00950	7 out of 810 0.864197530864197%	0.361074	7	EGP19307;EGP30489;EGP19460;EGP19462;EGP19467;EGP00684;EGP25859	EGP19307;EGP19460;EGP19467;EGP00684;EGP25859	5	EGP30489;EGP19462	2
Phosphatidylinositol signaling system	ko04070	11 out of 810 1.35802469135802%	0.362938	11	EGP10869;EGP08919;EGP31594;EGP10221;EGP21442;EGP21162;EGP22648;novel.1068;EGP12460;EGP21716;EGP18485	EGP10869;EGP10221;EGP21442;EGP21162;EGP22648;EGP21716;EGP18485	7	EGP08919;EGP31594;novel.1068;EGP12460	4
Lipoic acid metabolism	ko00785	1 out of 810 0.123456790123457%	0.386963	1	EGP01578	EGP01578	1	--	0
Monoterpenoid biosynthesis	ko00902	4 out of 810 0.493827160493827%	0.392682	4	EGP25484;EGP30586;EGP06877;EGP14245	EGP30586;EGP06877;EGP14245	3	EGP25484	1
Cutin, suberine and wax biosynthesis	ko00073	7 out of 810 0.864197530864197%	0.394842	7	EGP02677;EGP21415;EGP21416;EGP06308;EGP08554;EGP02917;EGP32455	EGP02677;EGP21415;EGP21416;EGP08554	4	EGP06308;EGP02917;EGP32455	3
Phenylalanine metabolism	ko00360	7 out of 810 0.864197530864197%	0.40611	7	EGP19307;EGP00684;EGP32188;EGP24622;novel.2017;EGP19548;EGP02256	EGP19307;EGP00684;EGP32188;EGP24622;EGP02256	5	novel.2017;EGP19548	2
Phosphonate and phosphinate metabolism	ko00440	1 out of 810 0.123456790123457%	0.428367	1	EGP31472	EGP31472	1	--	0
Pentose phosphate pathway	ko00030	13 out of 810 1.60493827160494%	0.465919	13	EGP08711;EGP05624;novel.186;EGP30776;EGP02387;EGP25924;EGP25925;EGP32309;EGP32311;EGP03220;novel.1374;novel.312;EGP23939	EGP08711;EGP05624;novel.186;EGP30776;EGP32309;EGP03220;novel.1374;EGP23939	8	EGP02387;EGP25924;EGP25925;EGP32311;novel.312	5
Propanoate metabolism	ko00640	5 out of 810 0.617283950617284%	0.475856	5	EGP19001;EGP02536;EGP32505;EGP26463;EGP25884	EGP02536;EGP32505;EGP26463;EGP25884	4	EGP19001	1
Porphyrin metabolism	ko00860	7 out of 810 0.864197530864197%	0.484252	7	EGP26723;EGP20623;EGP16486;EGP22133;EGP01597;EGP33822;EGP18900	EGP26723;EGP16486;EGP22133;EGP33822	4	EGP20623;EGP01597;EGP18900	3
Fructose and mannose metabolism	ko00051	14 out of 810 1.72839506172839%	0.506973	14	EGP30776;EGP02387;EGP25924;EGP25925;EGP32309;EGP32311;novel.1374;novel.312;EGP30944;EGP09430;EGP11447;EGP28326;EGP02708;EGP06745	EGP30776;EGP32309;novel.1374;EGP30944;EGP09430;EGP11447;EGP02708;EGP06745	8	EGP02387;EGP25924;EGP25925;EGP32311;novel.312;EGP28326	6
Citrate cycle (TCA cycle)	ko00020	5 out of 810 0.617283950617284%	0.515046	5	EGP16251;EGP32505;EGP25953;EGP24324;EGP16604	EGP16251;EGP32505;EGP25953;EGP16604	4	EGP24324	1
N-Glycan biosynthesis	ko00510	5 out of 810 0.617283950617284%	0.52784	5	EGP12073;EGP19475;EGP31009;EGP19914;EGP01384	EGP19475;EGP31009;EGP19914	3	EGP12073;EGP01384	2
RNA polymerase	ko03020	13 out of 810 1.60493827160494%	0.552446	13	EGP03170;novel.1115;novel.1507;novel.1678;novel.1769;novel.2313;novel.2611;novel.395;novel.512;novel.83;novel.655;novel.1019;EGP14750	novel.1115;novel.1507;novel.1769;novel.2313;novel.395;novel.512;novel.1019	7	EGP03170;novel.1678;novel.2611;novel.83;novel.655;EGP14750	6
Ubiquinone and other terpenoid-quinone biosynthesis	ko00130	5 out of 810 0.617283950617284%	0.56528	5	EGP24021;EGP13151;EGP00684;EGP10904;EGP26811	EGP24021;EGP13151;EGP00684;EGP10904	4	EGP26811	1
Glycosphingolipid biosynthesis - globo and isoglobo series	ko00603	1 out of 810 0.123456790123457%	0.567871	1	EGP10709	--	0	EGP10709	1
Betalain biosynthesis	ko00965	1 out of 810 0.123456790123457%	0.567871	1	EGP04964	EGP04964	1	--	0
Endocytosis	ko04144	23 out of 810 2.83950617283951%	0.568127	23	EGP29483;EGP09440;EGP03217;EGP33185;EGP32427;EGP32423;EGP13276;EGP18133;novel.929;EGP00718;EGP28027;EGP13680;EGP07037;EGP21392;EGP21627;EGP22426;EGP34470;EGP19605;EGP19607;EGP01798;EGP31090;EGP18822;EGP18820	EGP29483;EGP09440;EGP03217;EGP33185;EGP32427;EGP32423;EGP13276;EGP18133;EGP28027;EGP13680;EGP07037;EGP21392;EGP34470;EGP19605;EGP19607;EGP18822	16	novel.929;EGP00718;EGP21627;EGP22426;EGP01798;EGP31090;EGP18820	7
Proteasome	ko03050	6 out of 810 0.740740740740741%	0.62628	6	EGP03374;EGP01007;EGP16190;EGP31300;EGP11658;EGP13519	EGP01007;EGP16190;EGP31300	3	EGP03374;EGP11658;EGP13519	3
Carbon metabolism	ko01200	33 out of 810 4.07407407407407%	0.632334	33	EGP16251;EGP19786;EGP08711;EGP28180;EGP28179;EGP12546;EGP05624;novel.186;EGP02536;EGP32505;EGP30776;EGP02387;EGP25924;EGP25925;EGP18393;EGP20992;EGP03220;EGP13233;EGP25953;novel.1374;novel.312;EGP10670;EGP16604;EGP18457;EGP09430;EGP23939;EGP28107;EGP26463;EGP30838;EGP30833;EGP21129;EGP28812;EGP05229	EGP16251;EGP19786;EGP08711;EGP28179;EGP12546;EGP05624;novel.186;EGP02536;EGP32505;EGP30776;EGP18393;EGP20992;EGP03220;EGP13233;EGP25953;novel.1374;EGP10670;EGP16604;EGP18457;EGP09430;EGP23939;EGP28107;EGP26463;EGP30838;EGP21129;EGP28812;EGP05229	27	EGP28180;EGP02387;EGP25924;EGP25925;novel.312;EGP30833	6
One carbon pool by folate	ko00670	2 out of 810 0.246913580246914%	0.646032	2	EGP19038;novel.1884	EGP19038	1	novel.1884	1
Pyrimidine metabolism	ko00240	7 out of 810 0.864197530864197%	0.647672	7	EGP22202;EGP10435;EGP21563;EGP05946;novel.658;EGP12462;EGP13754	EGP22202;EGP10435;EGP21563;novel.658;EGP12462;EGP13754	6	EGP05946	1
Cysteine and methionine metabolism	ko00270	10 out of 810 1.23456790123457%	0.653622	10	EGP19001;EGP16251;EGP00684;EGP04413;EGP31232;EGP29671;EGP00925;EGP01662;EGP05229;EGP21024	EGP16251;EGP00684;EGP04413;EGP31232;EGP29671;EGP01662;EGP05229	7	EGP19001;EGP00925;EGP21024	3
Starch and sucrose metabolism	ko00500	25 out of 810 3.08641975308642%	0.662195	25	EGP26178;EGP26176;EGP06838;EGP05874;EGP26180;novel.433;EGP21245;EGP31706;EGP28121;EGP28482;EGP28691;EGP30936;EGP06995;EGP20449;EGP11386;novel.358;EGP05448;EGP30616;EGP09953;EGP02690;EGP27755;EGP23429;EGP30139;EGP17155;EGP13058	EGP06838;EGP21245;EGP28482;EGP28691;EGP30936;EGP06995;EGP20449;novel.358;EGP05448;EGP09953;EGP02690;EGP27755;EGP23429;EGP30139;EGP17155;EGP13058	16	EGP26178;EGP26176;EGP05874;EGP26180;novel.433;EGP31706;EGP28121;EGP11386;EGP30616	9
Taurine and hypotaurine metabolism	ko00430	1 out of 810 0.123456790123457%	0.673362	1	EGP02960	EGP02960	1	--	0
Glycine, serine and threonine metabolism	ko00260	7 out of 810 0.864197530864197%	0.683434	7	EGP19307;EGP32505;EGP13233;EGP09532;EGP18457;EGP28107;EGP21129	EGP19307;EGP32505;EGP13233;EGP09532;EGP18457;EGP28107;EGP21129	7	--	0
Thiamine metabolism	ko00730	2 out of 810 0.246913580246914%	0.709128	2	EGP31807;EGP17030	EGP31807	1	EGP17030	1
Nucleotide metabolism	ko01232	8 out of 810 0.987654320987654%	0.721946	8	EGP22202;EGP31807;EGP10435;EGP21563;EGP05946;novel.658;EGP12462;EGP13754	EGP22202;EGP31807;EGP10435;EGP21563;novel.658;EGP12462;EGP13754	7	EGP05946	1
Indole alkaloid biosynthesis	ko00901	1 out of 810 0.123456790123457%	0.735223	1	EGP32218	EGP32218	1	--	0
Glycerolipid metabolism	ko00561	11 out of 810 1.35802469135802%	0.737647	11	EGP18952;EGP10384;EGP19228;EGP30034;EGP21822;EGP31114;EGP02482;EGP10709;EGP30915;EGP21712;EGP32421	EGP18952;EGP21822;EGP31114;EGP21712;EGP32421	5	EGP10384;EGP19228;EGP30034;EGP02482;EGP10709;EGP30915	6
Various types of N-glycan biosynthesis	ko00513	3 out of 810 0.37037037037037%	0.73863	3	EGP19475;EGP19914;EGP01384	EGP19475;EGP19914	2	EGP01384	1
Photosynthesis - antenna proteins	ko00196	1 out of 810 0.123456790123457%	0.753124	1	EGP19984	--	0	EGP19984	1
Pantothenate and CoA biosynthesis	ko00770	4 out of 810 0.493827160493827%	0.772406	4	EGP10384;EGP19228;EGP12760;EGP01191	EGP12760;EGP01191	2	EGP10384;EGP19228	2
Peroxisome	ko04146	8 out of 810 0.987654320987654%	0.783753	8	EGP02536;EGP06406;EGP28812;EGP14825;EGP32018;EGP04328;EGP15977;EGP16620	EGP02536;EGP06406;EGP28812;EGP14825;EGP15977	5	EGP32018;EGP04328;EGP16620	3
Biosynthesis of unsaturated fatty acids	ko01040	2 out of 810 0.246913580246914%	0.785911	2	EGP02536;EGP08435	EGP02536;EGP08435	2	--	0
Lysine degradation	ko00310	4 out of 810 0.493827160493827%	0.789407	4	EGP10384;EGP19228;EGP32505;EGP16744	EGP32505;EGP16744	2	EGP10384;EGP19228	2
Nicotinate and nicotinamide metabolism	ko00760	2 out of 810 0.246913580246914%	0.807233	2	EGP21563;EGP12462	EGP21563;EGP12462	2	--	0
Terpenoid backbone biosynthesis	ko00900	4 out of 810 0.493827160493827%	0.812985	4	EGP30785;EGP00187;EGP31078;EGP28582	EGP30785	1	EGP00187;EGP31078;EGP28582	3
Benzoxazinoid biosynthesis	ko00402	1 out of 810 0.123456790123457%	0.826046	1	EGP18582	EGP18582	1	--	0
Sesquiterpenoid and triterpenoid biosynthesis	ko00909	4 out of 810 0.493827160493827%	0.841014	4	EGP12320;EGP05822;EGP31798;EGP00885	EGP05822;EGP31798	2	EGP12320;EGP00885	2
Nitrogen metabolism	ko00910	2 out of 810 0.246913580246914%	0.893879	2	EGP06370;EGP27612	EGP06370	1	EGP27612	1
Sulfur metabolism	ko00920	2 out of 810 0.246913580246914%	0.899629	2	EGP30646;EGP05229	EGP05229	1	EGP30646	1
SNARE interactions in vesicular transport	ko04130	2 out of 810 0.246913580246914%	0.910268	2	EGP13609;EGP00714	EGP13609;EGP00714	2	--	0
Carbon fixation in photosynthetic organisms	ko00710	9 out of 810 1.11111111111111%	0.911053	9	EGP16251;EGP19786;EGP18393;EGP20992;EGP25953;novel.1374;novel.312;EGP09430;EGP23939	EGP16251;EGP19786;EGP18393;EGP20992;EGP25953;novel.1374;EGP09430;EGP23939	8	novel.312	1
Riboflavin metabolism	ko00740	1 out of 810 0.123456790123457%	0.924966	1	EGP20638	--	0	EGP20638	1
Biotin metabolism	ko00780	1 out of 810 0.123456790123457%	0.924966	1	novel.1065	--	0	novel.1065	1
Valine, leucine and isoleucine biosynthesis	ko00290	1 out of 810 0.123456790123457%	0.934783	1	EGP18457	EGP18457	1	--	0
Purine metabolism	ko00230	6 out of 810 0.740740740740741%	0.935073	6	EGP04894;EGP31807;EGP10435;EGP05946;EGP33166;EGP12462	EGP04894;EGP31807;EGP10435;EGP33166;EGP12462	5	EGP05946	1
2-Oxocarboxylic acid metabolism	ko01210	3 out of 810 0.37037037037037%	0.939103	3	EGP16108;EGP16106;novel.2410	novel.2410	1	EGP16108;EGP16106	2
Aminoacyl-tRNA biosynthesis	ko00970	4 out of 810 0.493827160493827%	0.95198	4	EGP30791;EGP09504;EGP31061;EGP25423	EGP09504;EGP25423	2	EGP30791;EGP31061	2
Fatty acid metabolism	ko01212	6 out of 810 0.740740740740741%	0.956828	6	EGP02536;EGP06406;novel.1065;EGP08435;EGP33690;EGP25884	EGP02536;EGP06406;EGP08435;EGP33690;EGP25884	5	novel.1065	1
Phenylalanine, tyrosine and tryptophan biosynthesis	ko00400	3 out of 810 0.37037037037037%	0.959645	3	EGP00684;EGP21626;EGP04332	EGP00684;EGP21626;EGP04332	3	--	0
Fatty acid elongation	ko00062	1 out of 810 0.123456790123457%	0.960086	1	EGP19689	EGP19689	1	--	0
Fatty acid biosynthesis	ko00061	3 out of 810 0.37037037037037%	0.961698	3	EGP06406;novel.1065;EGP25884	EGP06406;EGP25884	2	novel.1065	1
Biosynthesis of cofactors	ko01240	19 out of 810 2.34567901234568%	0.962039	19	EGP18952;EGP19572;EGP10384;EGP19228;EGP32505;EGP20638;EGP31807;EGP10435;EGP26723;EGP09169;EGP20623;EGP22956;EGP24115;EGP16137;novel.1065;EGP12460;EGP26811;EGP17030;EGP01578	EGP18952;EGP32505;EGP31807;EGP10435;EGP26723;EGP09169;EGP24115;EGP16137;EGP01578	9	EGP19572;EGP10384;EGP19228;EGP20638;EGP20623;EGP22956;novel.1065;EGP12460;EGP26811;EGP17030	10
Nucleocytoplasmic transport	ko03013	9 out of 810 1.11111111111111%	0.964233	9	EGP00474;EGP09100;EGP09099;EGP10515;EGP25720;EGP30312;EGP20678;EGP04330;EGP27917	EGP00474;EGP25720;EGP30312;EGP20678;EGP04330;EGP27917	6	EGP09100;EGP09099;EGP10515	3
Protein export	ko03060	2 out of 810 0.246913580246914%	0.966354	2	EGP04116;EGP32463	--	0	EGP04116;EGP32463	2
Phagosome	ko04145	5 out of 810 0.617283950617284%	0.981091	5	EGP08919;EGP26076;EGP29257;EGP28027;EGP04116	EGP28027	1	EGP08919;EGP26076;EGP29257;EGP04116	4
Ubiquitin mediated proteolysis	ko04120	12 out of 810 1.48148148148148%	0.982622	12	EGP26508;EGP18339;EGP11089;EGP07150;EGP11627;EGP02943;EGP13430;EGP02801;EGP10515;EGP23552;EGP10191;EGP24307	EGP26508;EGP18339;EGP11089;EGP07150;EGP11627;EGP02943;EGP23552;EGP10191	8	EGP13430;EGP02801;EGP10515;EGP24307	4
Homologous recombination	ko03440	4 out of 810 0.493827160493827%	0.98363	4	EGP20739;EGP20291;EGP30715;novel.775	novel.775	1	EGP20739;EGP20291;EGP30715	3
Tryptophan metabolism	ko00380	10 out of 810 1.23456790123457%	0.990119	10	EGP10384;EGP19228;EGP32505;EGP32188;EGP28812;EGP19311;EGP16108;EGP16106;novel.2410;EGP21833	EGP32505;EGP32188;EGP28812;EGP19311;novel.2410	5	EGP10384;EGP19228;EGP16108;EGP16106;EGP21833	5
Photosynthesis	ko00195	5 out of 810 0.617283950617284%	0.992442	5	novel.939;EGP14223;novel.1511;novel.202;EGP34383	EGP34383	1	novel.939;EGP14223;novel.1511;novel.202	4
mRNA surveillance pathway	ko03015	6 out of 810 0.740740740740741%	0.993695	6	EGP06631;EGP14609;EGP15823;novel.994;EGP06962;EGP31045	EGP14609;novel.994;EGP06962	3	EGP06631;EGP15823;EGP31045	3
Biosynthesis of amino acids	ko01230	19 out of 810 2.34567901234568%	0.994025	19	EGP30776;EGP02387;EGP25924;EGP25925;EGP18393;EGP20992;EGP13233;EGP09532;novel.1374;novel.312;EGP21626;EGP18457;EGP09430;EGP23939;EGP28107;EGP15762;EGP05229;EGP04332;EGP16209	EGP30776;EGP18393;EGP20992;EGP13233;EGP09532;novel.1374;EGP21626;EGP18457;EGP09430;EGP23939;EGP28107;EGP15762;EGP05229;EGP04332	14	EGP02387;EGP25924;EGP25925;novel.312;EGP16209	5
Nucleotide excision repair	ko03420	2 out of 810 0.246913580246914%	0.994544	2	EGP20739;EGP10055	EGP10055	1	EGP20739	1
Mismatch repair	ko03430	1 out of 810 0.123456790123457%	0.997237	1	EGP20739	--	0	EGP20739	1
Ribosome biogenesis in eukaryotes	ko03008	4 out of 810 0.493827160493827%	0.999388	4	EGP19716;EGP31292;EGP27417;EGP05345	EGP19716;EGP31292	2	EGP27417;EGP05345	2
DNA replication	ko03030	2 out of 810 0.246913580246914%	0.999402	2	EGP08571;EGP20739	--	0	EGP08571;EGP20739	2
Spliceosome	ko03040	14 out of 810 1.72839506172839%	0.999604	14	EGP09440;EGP03217;EGP33185;EGP32427;EGP32423;EGP13276;EGP18133;novel.929;EGP16430;EGP05419;EGP21158;EGP26402;EGP24329;novel.808	EGP09440;EGP03217;EGP33185;EGP32427;EGP32423;EGP13276;EGP18133;EGP05419;EGP21158;EGP26402;EGP24329;novel.808	12	novel.929;EGP16430	2
Base excision repair	ko03410	4 out of 810 0.493827160493827%	0.999962	4	EGP11523;EGP25748;EGP32101;novel.2303	EGP32101	1	EGP11523;EGP25748;novel.2303	3
Oxidative phosphorylation	ko00190	10 out of 810 1.23456790123457%	0.999999	10	novel.767;EGP24990;novel.939;EGP14223;novel.1511;novel.202;EGP08925;EGP03128;EGP04011;novel.1421	novel.767;EGP24990;EGP03128	3	novel.939;EGP14223;novel.1511;novel.202;EGP08925;EGP04011;novel.1421	7
Ribosome	ko03010	11 out of 810 1.35802469135802%	1	11	EGP02720;EGP15893;EGP34474;novel.1584;EGP01043;novel.1912;EGP05675;EGP25559;EGP07144;EGP11298;EGP21765	EGP02720;EGP15893;EGP11298;EGP21765	4	EGP34474;novel.1584;EGP01043;novel.1912;EGP05675;EGP25559;EGP07144	7
