# Supplementary material for: Genome-Wide Analysis of R2R3-MYB Genes and Functional Characterization of SmMYB75 in Eggplant Fruit Implications for Crop Improvement and Nutritional Enhancement
Source: Int J Mol Sci. 2024 Jan 18;25(2):1163. doi: 10.3390/ijms25021163 (PMC10816229; doi:10.3390/ijms25021163)
Supplement: Supplementary file 1 [file ijms-25-01163-s001.zip › Table S7.xlsx]

## Sheet: Supplementary Table S7
Supplementary Table S7. Go classification enrichment of DEGs.
Ontology	ID	Description	GeneRatio	pvalue	Count	geneID	Up_gene	Up	Down_gene	Down
Cellular component	GO:0048046	apoplast	53/1402	2.50013e-06	53	EGP18419;EGP30350;EGP05393;EGP31225;novel.2208;EGP28530;EGP04464;EGP32052;EGP32972;EGP09649;EGP04463;EGP25931;EGP12552;EGP28168;EGP11409;EGP02234;EGP12766;EGP28170;EGP33185;EGP28171;EGP26594;EGP11657;EGP16251;EGP28172;EGP10720;EGP11658;EGP33632;EGP04469;EGP30296;EGP11626;EGP24248;EGP04471;EGP22353;EGP30034;EGP13603;EGP21684;EGP06424;EGP31025;EGP23619;EGP16989;EGP14716;EGP20449;EGP09678;novel.2165…	EGP18419;EGP05393;EGP31225;EGP28530;EGP04464;EGP32052;EGP09649;EGP04463;EGP12552;EGP12766;EGP33185;EGP26594;EGP16251;EGP10720;EGP04469;EGP13603;EGP23619;EGP16989;EGP14716;EGP20449;EGP09678;novel.2165;novel.2207;EGP06204;EGP22548;novel.460;EGP09183;EGP07150	28	EGP30350;novel.2208;EGP32972;EGP25931;EGP28168;EGP11409;EGP02234;EGP28170;EGP28171;EGP11657;EGP28172;EGP11658;EGP33632;EGP30296;EGP11626;EGP24248;EGP04471;EGP22353;EGP30034;EGP21684;EGP06424;EGP31025;EGP13251;EGP18912;EGP18016	25
Cellular component	GO:0005615	extracellular space	22/1402	0.010173	22	EGP06199;EGP30350;novel.2208;EGP12845;EGP28168;EGP25999;EGP28170;EGP28442;EGP28171;EGP06195;EGP07045;EGP28172;EGP30296;EGP24576;EGP30841;EGP30844;EGP28526;novel.2207;EGP30839;EGP28539;EGP22548;EGP18912	EGP06199;EGP12845;EGP25999;EGP28442;EGP06195;EGP24576;EGP30841;EGP30844;EGP28526;novel.2207;EGP30839;EGP28539;EGP22548	13	EGP30350;novel.2208;EGP28168;EGP28170;EGP28171;EGP07045;EGP28172;EGP30296;EGP18912	9
Cellular component	GO:0031226	intrinsic component of plasma membrane	32/1402	0.010424	32	EGP09197;EGP02794;EGP11000;EGP01052;EGP30139;EGP02432;EGP17155;EGP26594;EGP23429;EGP25883;EGP11626;EGP04116;EGP06555;EGP11079;EGP13021;EGP25924;EGP00133;EGP04095;EGP00230;EGP13058;EGP25925;novel.1789;EGP27755;EGP32309;EGP10851;EGP20210;EGP07512;EGP32311;EGP16456;EGP02387;EGP25549;EGP09183	EGP09197;EGP02794;EGP01052;EGP30139;EGP17155;EGP26594;EGP23429;EGP06555;EGP13021;EGP04095;EGP00230;EGP13058;EGP27755;EGP32309;EGP20210;EGP16456;EGP09183	17	EGP11000;EGP02432;EGP25883;EGP11626;EGP04116;EGP11079;EGP25924;EGP00133;EGP25925;novel.1789;EGP10851;EGP07512;EGP32311;EGP02387;EGP25549	15
Cellular component	GO:0099503	secretory vesicle	15/1402	0.0164204	15	EGP05393;EGP28230;EGP09649;EGP23891;EGP25931;EGP12552;EGP28442;EGP26594;novel.997;EGP08711;EGP33545;EGP13603;EGP06424;EGP14716;EGP09678	EGP05393;EGP28230;EGP09649;EGP23891;EGP12552;EGP28442;EGP26594;EGP08711;EGP33545;EGP13603;EGP14716;EGP09678	12	EGP25931;novel.997;EGP06424	3
Cellular component	GO:0005887	integral component of plasma membrane	16/1402	0.0295497	16	EGP09197;EGP11000;EGP25883;EGP11626;EGP11079;EGP13021;EGP25924;EGP00133;EGP25925;novel.1789;EGP32309;EGP10851;EGP07512;EGP32311;EGP16456;EGP02387	EGP09197;EGP13021;EGP32309;EGP16456	4	EGP11000;EGP25883;EGP11626;EGP11079;EGP25924;EGP00133;EGP25925;novel.1789;EGP10851;EGP07512;EGP32311;EGP02387	12
Cellular component	GO:0031225	anchored component of membrane	24/1402	0.0338373	24	EGP02794;EGP02760;EGP01052;EGP22915;EGP30139;EGP02432;EGP17155;EGP26594;EGP23429;EGP12983;EGP04116;EGP06555;EGP21076;EGP04095;EGP00230;EGP13058;EGP27755;EGP20210;EGP21647;EGP24557;EGP32338;EGP25549;EGP19538;EGP09183	EGP02794;EGP01052;EGP22915;EGP30139;EGP17155;EGP26594;EGP23429;EGP12983;EGP06555;EGP21076;EGP04095;EGP00230;EGP13058;EGP27755;EGP20210;EGP21647;EGP32338;EGP19538;EGP09183	19	EGP02760;EGP02432;EGP04116;EGP24557;EGP25549	5
Cellular component	GO:0046658	anchored component of plasma membrane	16/1402	0.0992445	16	EGP02794;EGP01052;EGP30139;EGP02432;EGP17155;EGP26594;EGP23429;EGP04116;EGP06555;EGP04095;EGP00230;EGP13058;EGP27755;EGP20210;EGP25549;EGP09183	EGP02794;EGP01052;EGP30139;EGP17155;EGP26594;EGP23429;EGP06555;EGP04095;EGP00230;EGP13058;EGP27755;EGP20210;EGP09183	13	EGP02432;EGP04116;EGP25549	3
Cellular component	GO:0045263	proton-transporting ATP synthase complex, coupling factor F(o)	3/1402	0.125964	3	EGP14223;novel.939;novel.1511	--	0	EGP14223;novel.939;novel.1511	3
Cellular component	GO:0005811	lipid droplet	6/1402	0.134218	6	EGP31366;EGP02917;EGP08554;EGP09605;EGP31367;EGP09875	EGP31366;EGP08554;EGP09605;EGP31367;EGP09875	5	EGP02917	1
Cellular component	GO:0010598	NAD(P)H dehydrogenase complex (plastoquinone)	2/1402	0.137394	2	EGP16430;EGP23032	EGP23032	1	EGP16430	1
Cellular component	GO:0034707	chloride channel complex	2/1402	0.137394	2	EGP09730;EGP29902	EGP09730;EGP29902	2	--	0
Cellular component	GO:0035861	site of double-strand break	2/1402	0.137394	2	EGP10090;EGP18669	EGP10090;EGP18669	2	--	0
Cellular component	GO:0090734	site of DNA damage	2/1402	0.137394	2	EGP10090;EGP18669	EGP10090;EGP18669	2	--	0
Cellular component	GO:0034098	VCP-NPL4-UFD1 AAA ATPase complex	2/1402	0.160905	2	EGP10536;novel.857	EGP10536;novel.857	2	--	0
Cellular component	GO:0035618	root hair	2/1402	0.185065	2	EGP03045;EGP15896	EGP15896	1	EGP03045	1
Cellular component	GO:0009543	chloroplast thylakoid lumen	6/1402	0.191416	6	EGP31699;EGP19467;EGP19462;EGP30489;EGP19460;EGP26095	EGP31699;EGP19467;EGP19460;EGP26095	4	EGP19462;EGP30489	2
Cellular component	GO:0031978	plastid thylakoid lumen	6/1402	0.191416	6	EGP31699;EGP19467;EGP19462;EGP30489;EGP19460;EGP26095	EGP31699;EGP19467;EGP19460;EGP26095	4	EGP19462;EGP30489	2
Cellular component	GO:0009505	plant-type cell wall	19/1402	0.203364	19	EGP19425;EGP20918;EGP32972;EGP23891;EGP25429;EGP15681;EGP13760;EGP23698;EGP09953;novel.1226;EGP28172;EGP30989;EGP01102;EGP27988;EGP06080;EGP30890;EGP30314;EGP20210;EGP18016	EGP20918;EGP23891;EGP25429;EGP15681;EGP13760;EGP23698;EGP09953;novel.1226;EGP27988;EGP06080;EGP30314;EGP20210	12	EGP19425;EGP32972;EGP28172;EGP30989;EGP01102;EGP30890;EGP18016	7
Cellular component	GO:0005764	lysosome	6/1402	0.212278	6	EGP12845;EGP28442;EGP13760;EGP07045;EGP13173;EGP31781	EGP12845;EGP28442;EGP13760;EGP13173	4	EGP07045;EGP31781	2
Cellular component	GO:0030176	integral component of endoplasmic reticulum membrane	8/1402	0.241058	8	EGP12462;EGP32463;EGP08904;EGP23937;EGP32309;EGP32311;EGP13435;EGP31009	EGP12462;EGP32309;EGP13435;EGP31009	4	EGP32463;EGP08904;EGP23937;EGP32311	4
Cellular component	GO:0031227	intrinsic component of endoplasmic reticulum membrane	8/1402	0.259731	8	EGP12462;EGP32463;EGP08904;EGP23937;EGP32309;EGP32311;EGP13435;EGP31009	EGP12462;EGP32309;EGP13435;EGP31009	4	EGP32463;EGP08904;EGP23937;EGP32311	4
Cellular component	GO:0032541	cortical endoplasmic reticulum	2/1402	0.284756	2	EGP06934;EGP10359	EGP06934	1	EGP10359	1
Cellular component	GO:0009705	plant-type vacuole membrane	12/1402	0.292904	12	EGP21158;EGP09197;EGP10096;EGP29902;EGP25429;EGP14277;EGP13540;EGP21615;EGP13890;EGP05419;EGP16717;EGP19523	EGP21158;EGP09197;EGP10096;EGP29902;EGP25429;EGP14277;EGP13540;EGP05419;EGP19523	9	EGP21615;EGP13890;EGP16717	3
Cellular component	GO:0000322	storage vacuole	3/1402	0.298247	3	EGP25429;EGP32394;EGP21615	EGP25429;EGP32394	2	EGP21615	1
Cellular component	GO:0000326	protein storage vacuole	3/1402	0.298247	3	EGP25429;EGP32394;EGP21615	EGP25429;EGP32394	2	EGP21615	1
Cellular component	GO:0005662	DNA replication factor A complex	2/1402	0.309755	2	EGP20739;EGP15437	--	0	EGP20739;EGP15437	2
Cellular component	GO:0012510	trans-Golgi network transport vesicle membrane	2/1402	0.309755	2	EGP00626;EGP00718	EGP00626	1	EGP00718	1
Cellular component	GO:0031012	extracellular matrix	2/1402	0.309755	2	EGP13201;EGP31245	EGP31245	1	EGP13201	1
Cellular component	GO:0101031	chaperone complex	2/1402	0.309755	2	EGP28036;EGP33825	EGP28036;EGP33825	2	--	0
Cellular component	GO:0000323	lytic vacuole	6/1402	0.313871	6	EGP12845;EGP28442;EGP13760;EGP07045;EGP13173;EGP31781	EGP12845;EGP28442;EGP13760;EGP13173	4	EGP07045;EGP31781	2
Cellular component	GO:0031977	thylakoid lumen	6/1402	0.325683	6	EGP31699;EGP19467;EGP19462;EGP30489;EGP19460;EGP26095	EGP31699;EGP19467;EGP19460;EGP26095	4	EGP19462;EGP30489	2
Cellular component	GO:0034702	ion channel complex	2/1402	0.334567	2	EGP09730;EGP29902	EGP09730;EGP29902	2	--	0
Cellular component	GO:0005871	kinesin complex	3/1402	0.353607	3	EGP18192;EGP07037;EGP00141	EGP07037;EGP00141	2	EGP18192	1
Cellular component	GO:0033177	proton-transporting two-sector ATPase complex, proton-transporting domain	3/1402	0.371983	3	EGP14223;novel.939;novel.1511	--	0	EGP14223;novel.939;novel.1511	3
Cellular component	GO:0120025	plasma membrane bounded cell projection	9/1402	0.403464	9	EGP28230;EGP23891;EGP28004;EGP04541;EGP06065;EGP03045;novel.1571;EGP13706;EGP15896	EGP28230;EGP23891;EGP28004;EGP04541;EGP06065;novel.1571;EGP13706;EGP15896	8	EGP03045	1
Cellular component	GO:0015030	Cajal body	2/1402	0.407102	2	EGP19307;EGP19302	EGP19307;EGP19302	2	--	0
Cellular component	GO:0030140	trans-Golgi network transport vesicle	2/1402	0.407102	2	EGP00626;EGP00718	EGP00626	1	EGP00718	1
Cellular component	GO:1902495	transmembrane transporter complex	2/1402	0.407102	2	EGP09730;EGP29902	EGP09730;EGP29902	2	--	0
Cellular component	GO:0099081	supramolecular polymer	18/1402	0.416128	18	EGP18192;EGP18770;EGP03122;EGP05343;EGP28004;EGP10433;EGP07037;EGP01400;EGP30956;EGP18310;EGP20726;EGP13706;EGP17205;EGP11467;EGP01402;EGP01401;EGP00141;EGP29257	EGP05343;EGP28004;EGP10433;EGP07037;EGP01400;EGP30956;EGP20726;EGP13706;EGP17205;EGP11467;EGP01402;EGP01401;EGP00141	13	EGP18192;EGP18770;EGP03122;EGP18310;EGP29257	5
Cellular component	GO:0099512	supramolecular fiber	18/1402	0.416128	18	EGP18192;EGP18770;EGP03122;EGP05343;EGP28004;EGP10433;EGP07037;EGP01400;EGP30956;EGP18310;EGP20726;EGP13706;EGP17205;EGP11467;EGP01402;EGP01401;EGP00141;EGP29257	EGP05343;EGP28004;EGP10433;EGP07037;EGP01400;EGP30956;EGP20726;EGP13706;EGP17205;EGP11467;EGP01402;EGP01401;EGP00141	13	EGP18192;EGP18770;EGP03122;EGP18310;EGP29257	5
Cellular component	GO:0099513	polymeric cytoskeletal fiber	18/1402	0.416128	18	EGP18192;EGP18770;EGP03122;EGP05343;EGP28004;EGP10433;EGP07037;EGP01400;EGP30956;EGP18310;EGP20726;EGP13706;EGP17205;EGP11467;EGP01402;EGP01401;EGP00141;EGP29257	EGP05343;EGP28004;EGP10433;EGP07037;EGP01400;EGP30956;EGP20726;EGP13706;EGP17205;EGP11467;EGP01402;EGP01401;EGP00141	13	EGP18192;EGP18770;EGP03122;EGP18310;EGP29257	5
Cellular component	GO:0000325	plant-type vacuole	15/1402	0.418837	15	EGP21158;EGP09197;EGP10096;EGP12845;EGP29902;EGP25429;EGP32394;EGP14277;EGP30372;EGP13540;EGP21615;EGP13890;EGP05419;EGP16717;EGP19523	EGP21158;EGP09197;EGP10096;EGP12845;EGP29902;EGP25429;EGP32394;EGP14277;EGP13540;EGP05419;EGP19523	11	EGP30372;EGP21615;EGP13890;EGP16717	4
Cellular component	GO:0000815	ESCRT III complex	2/1402	0.430442	2	novel.1585;EGP34470	EGP34470	1	novel.1585	1
Cellular component	GO:0005874	microtubule	17/1402	0.441995	17	EGP18192;EGP18770;EGP03122;EGP05343;EGP28004;EGP10433;EGP07037;EGP01400;EGP30956;EGP18310;EGP20726;EGP13706;EGP11467;EGP01402;EGP01401;EGP00141;EGP29257	EGP05343;EGP28004;EGP10433;EGP07037;EGP01400;EGP30956;EGP20726;EGP13706;EGP11467;EGP01402;EGP01401;EGP00141	12	EGP18192;EGP18770;EGP03122;EGP18310;EGP29257	5
Cellular component	GO:0042995	cell projection	10/1402	0.443254	10	EGP28230;EGP23891;EGP28004;EGP04541;EGP06065;EGP03045;novel.1571;EGP13706;EGP15896;EGP29483	EGP28230;EGP23891;EGP28004;EGP04541;EGP06065;novel.1571;EGP13706;EGP15896;EGP29483	9	EGP03045	1
Cellular component	GO:0032580	Golgi cisterna membrane	3/1402	0.444133	3	EGP16137;EGP21838;EGP24115	EGP16137;EGP21838;EGP24115	3	--	0
Cellular component	GO:0005802	trans-Golgi network	22/1402	0.449979	22	EGP19329;EGP31473;EGP10901;EGP16137;EGP28160;EGP27794;EGP27962;EGP28764;EGP21907;EGP00626;EGP21392;EGP16394;EGP04116;EGP31804;EGP00220;EGP01207;EGP13736;EGP24851;EGP23428;EGP28106;EGP19605;EGP31800	EGP19329;EGP16137;EGP28160;EGP27794;EGP27962;EGP28764;EGP21907;EGP00626;EGP21392;EGP00220;EGP01207;EGP24851;EGP23428;EGP28106;EGP19605;EGP31800	16	EGP31473;EGP10901;EGP16394;EGP04116;EGP31804;EGP13736	6
Cellular component	GO:0071782	endoplasmic reticulum tubular network	2/1402	0.453281	2	EGP06934;EGP10359	EGP06934	1	EGP10359	1
Cellular component	GO:0019005	SCF ubiquitin ligase complex	5/1402	0.467461	5	EGP16692;EGP02497;EGP13932;EGP15937;EGP09831	EGP16692;EGP13932;EGP15937	3	EGP02497;EGP09831	2
Cellular component	GO:0005938	cell cortex	9/1402	0.470025	9	EGP18770;EGP28230;EGP03122;EGP14030;EGP06934;EGP10359;EGP16759;EGP32367;EGP30225	EGP28230;EGP14030;EGP06934;EGP16759	4	EGP18770;EGP03122;EGP10359;EGP32367;EGP30225	5
Cellular component	GO:0005765	lysosomal membrane	2/1402	0.475587	2	EGP13760;EGP31781	EGP13760	1	EGP31781	1
Cellular component	GO:0098852	lytic vacuole membrane	2/1402	0.475587	2	EGP13760;EGP31781	EGP13760	1	EGP31781	1
Cellular component	GO:0005930	axoneme	1/1402	0.494289	1	EGP13706	EGP13706	1	--	0
Cellular component	GO:0030130	clathrin coat of trans-Golgi network vesicle	1/1402	0.494289	1	EGP00718	--	0	EGP00718	1
Cellular component	GO:0030132	clathrin coat of coated pit	1/1402	0.494289	1	EGP00718	--	0	EGP00718	1
Cellular component	GO:0030874	nucleolar chromatin	1/1402	0.494289	1	EGP13379	EGP13379	1	--	0
Cellular component	GO:0032838	plasma membrane bounded cell projection cytoplasm	1/1402	0.494289	1	EGP13706	EGP13706	1	--	0
Cellular component	GO:0097014	ciliary plasm	1/1402	0.494289	1	EGP13706	EGP13706	1	--	0
Cellular component	GO:0099568	cytoplasmic region	1/1402	0.494289	1	EGP13706	EGP13706	1	--	0
Cellular component	GO:0000791	euchromatin	2/1402	0.518484	2	EGP19307;EGP19302	EGP19307;EGP19302	2	--	0
Cellular component	GO:1990351	transporter complex	2/1402	0.518484	2	EGP09730;EGP29902	EGP09730;EGP29902	2	--	0
Cellular component	GO:0005929	cilium	1/1402	0.527627	1	EGP13706	EGP13706	1	--	0
Cellular component	GO:0010282	senescence-associated vacuole	1/1402	0.527627	1	EGP12845	EGP12845	1	--	0
Cellular component	GO:0031514	motile cilium	1/1402	0.527627	1	EGP13706	EGP13706	1	--	0
Cellular component	GO:0055037	recycling endosome	1/1402	0.527627	1	EGP20714	--	0	EGP20714	1
Cellular component	GO:0071006	U2-type catalytic step 1 spliceosome	1/1402	0.527627	1	EGP28117	EGP28117	1	--	0
Cellular component	GO:0071012	catalytic step 1 spliceosome	1/1402	0.527627	1	EGP28117	EGP28117	1	--	0
Cellular component	GO:0000138	Golgi trans cisterna	5/1402	0.530861	5	EGP19329;EGP31473;EGP16137;EGP28160;EGP24851	EGP19329;EGP16137;EGP28160;EGP24851	4	EGP31473	1
Cellular component	GO:0030894	replisome	2/1402	0.539037	2	EGP20739;EGP15437	--	0	EGP20739;EGP15437	2
Cellular component	GO:0043601	nuclear replisome	2/1402	0.539037	2	EGP20739;EGP15437	--	0	EGP20739;EGP15437	2
Cellular component	GO:0031985	Golgi cisterna	12/1402	0.557436	12	EGP19329;EGP31473;EGP16137;EGP28160;EGP27794;EGP28764;EGP21907;EGP13736;EGP21838;EGP24851;EGP24115;EGP31800	EGP19329;EGP16137;EGP28160;EGP27794;EGP28764;EGP21907;EGP21838;EGP24851;EGP24115;EGP31800	10	EGP31473;EGP13736	2
Cellular component	GO:0005884	actin filament	1/1402	0.558769	1	EGP17205	EGP17205	1	--	0
Cellular component	GO:0045335	phagocytic vesicle	1/1402	0.558769	1	EGP32367	--	0	EGP32367	1
Cellular component	GO:0000145	exocyst	3/1402	0.561184	3	EGP14030;EGP16759;EGP32367	EGP14030;EGP16759	2	EGP32367	1
Cellular component	GO:0005797	Golgi medial cisterna	4/1402	0.577372	4	EGP27794;EGP21907;EGP13736;EGP31800	EGP27794;EGP21907;EGP31800	3	EGP13736	1
Cellular component	GO:0000792	heterochromatin	2/1402	0.578287	2	EGP19255;EGP13609	EGP13609	1	EGP19255	1
Cellular component	GO:0016324	apical plasma membrane	2/1402	0.578287	2	EGP28230;EGP13221	EGP28230;EGP13221	2	--	0
Cellular component	GO:0043596	nuclear replication fork	2/1402	0.578287	2	EGP20739;EGP15437	--	0	EGP20739;EGP15437	2
Cellular component	GO:0035838	growing cell tip	1/1402	0.587859	1	EGP06065	EGP06065	1	--	0
Cellular component	GO:0090404	pollen tube tip	1/1402	0.587859	1	EGP06065	EGP06065	1	--	0
Cellular component	GO:0005875	microtubule associated complex	4/1402	0.603205	4	EGP18192;EGP07037;EGP13706;EGP00141	EGP07037;EGP13706;EGP00141	3	EGP18192	1
Cellular component	GO:0045177	apical part of cell	2/1402	0.615028	2	EGP28230;EGP13221	EGP28230;EGP13221	2	--	0
Cellular component	GO:0055028	cortical microtubule	2/1402	0.615028	2	EGP18770;EGP03122	--	0	EGP18770;EGP03122	2
Cellular component	GO:0009574	preprophase band	1/1402	0.615033	1	EGP20726	EGP20726	1	--	0
Cellular component	GO:0030427	site of polarized growth	1/1402	0.615033	1	EGP06065	EGP06065	1	--	0
Cellular component	GO:0005905	clathrin-coated pit	2/1402	0.632456	2	EGP06065;EGP00718	EGP06065	1	EGP00718	1
Cellular component	GO:0005795	Golgi stack	12/1402	0.638806	12	EGP19329;EGP31473;EGP16137;EGP28160;EGP27794;EGP28764;EGP21907;EGP13736;EGP21838;EGP24851;EGP24115;EGP31800	EGP19329;EGP16137;EGP28160;EGP27794;EGP28764;EGP21907;EGP21838;EGP24851;EGP24115;EGP31800	10	EGP31473;EGP13736	2
Cellular component	GO:0045259	proton-transporting ATP synthase complex	4/1402	0.640103	4	EGP14223;novel.1520;novel.939;novel.1511	novel.1520	1	EGP14223;novel.939;novel.1511	3
Cellular component	GO:0098590	plasma membrane region	4/1402	0.640103	4	EGP28230;EGP13221;EGP06065;EGP00718	EGP28230;EGP13221;EGP06065	3	EGP00718	1
Cellular component	GO:0000176	nuclear exosome (RNase complex)	1/1402	0.640416	1	novel.1560	novel.1560	1	--	0
Cellular component	GO:0045239	tricarboxylic acid cycle enzyme complex	1/1402	0.640416	1	EGP16604	EGP16604	1	--	0
Cellular component	GO:0000118	histone deacetylase complex	3/1402	0.648682	3	EGP19849;EGP19847;EGP19848	--	0	EGP19849;EGP19847;EGP19848	3
Cellular component	GO:0030981	cortical microtubule cytoskeleton	2/1402	0.64926	2	EGP18770;EGP03122	--	0	EGP18770;EGP03122	2
Cellular component	GO:0005657	replication fork	3/1402	0.661991	3	EGP20739;novel.775;EGP15437	novel.775	1	EGP20739;EGP15437	2
Cellular component	GO:0000177	cytoplasmic exosome (RNase complex)	1/1402	0.664127	1	novel.1560	novel.1560	1	--	0
Cellular component	GO:0000974	Prp19 complex	1/1402	0.664127	1	EGP28117	EGP28117	1	--	0
Cellular component	GO:0030863	cortical cytoskeleton	2/1402	0.681027	2	EGP18770;EGP03122	--	0	EGP18770;EGP03122	2
Cellular component	GO:0005753	mitochondrial proton-transporting ATP synthase complex	1/1402	0.686275	1	novel.1520	novel.1520	1	--	0
Cellular component	GO:0010319	stromule	1/1402	0.686275	1	EGP16251	EGP16251	1	--	0
Cellular component	GO:0051286	cell tip	1/1402	0.686275	1	EGP06065	EGP06065	1	--	0
Cellular component	GO:0060187	cell pole	1/1402	0.686275	1	EGP06065	EGP06065	1	--	0
Cellular component	GO:0030665	clathrin-coated vesicle membrane	2/1402	0.696008	2	EGP00626;EGP00718	EGP00626	1	EGP00718	1
Cellular component	GO:0015630	microtubule cytoskeleton	18/1402	0.704552	18	EGP18192;EGP18770;EGP03122;EGP05343;EGP28004;EGP10433;EGP07037;EGP01400;EGP30956;EGP18310;EGP20726;EGP13706;EGP11467;EGP01402;EGP01401;EGP00141;EGP29257;EGP30679	EGP05343;EGP28004;EGP10433;EGP07037;EGP01400;EGP30956;EGP20726;EGP13706;EGP11467;EGP01402;EGP01401;EGP00141	12	EGP18192;EGP18770;EGP03122;EGP18310;EGP29257;EGP30679	6
Cellular component	GO:0000315	organellar large ribosomal subunit	1/1402	0.706964	1	novel.982	--	0	novel.982	1
Cellular component	GO:0005762	mitochondrial large ribosomal subunit	1/1402	0.706964	1	novel.982	--	0	novel.982	1
Cellular component	GO:0012511	monolayer-surrounded lipid storage body	1/1402	0.706964	1	EGP09875	EGP09875	1	--	0
Cellular component	GO:0005771	multivesicular body	2/1402	0.710401	2	novel.1585;EGP34470	EGP34470	1	novel.1585	1
Cellular component	GO:0005881	cytoplasmic microtubule	2/1402	0.710401	2	EGP18770;EGP03122	--	0	EGP18770;EGP03122	2
Cellular component	GO:0005770	late endosome	5/1402	0.724124	5	novel.1053;EGP31143;EGP20714;novel.1585;EGP34470	EGP31143;EGP34470	2	novel.1053;EGP20714;novel.1585	3
Cellular component	GO:0019897	extrinsic component of plasma membrane	2/1402	0.724218	2	EGP01384;EGP26278	EGP26278	1	EGP01384	1
Cellular component	GO:0000781	chromosome, telomeric region	1/1402	0.726289	1	EGP02454	EGP02454	1	--	0
Cellular component	GO:0090406	pollen tube	5/1402	0.73296	5	EGP28230;EGP23891;EGP04541;EGP06065;novel.1571	EGP28230;EGP23891;EGP04541;EGP06065;novel.1571	5	--	0
Cellular component	GO:0005744	TIM23 mitochondrial import inner membrane translocase complex	1/1402	0.744341	1	EGP13595	--	0	EGP13595	1
Cellular component	GO:0010494	cytoplasmic stress granule	1/1402	0.744341	1	EGP13194	--	0	EGP13194	1
Cellular component	GO:0030125	clathrin vesicle coat	1/1402	0.744341	1	EGP00718	--	0	EGP00718	1
Cellular component	GO:0005732	sno(s)RNA-containing ribonucleoprotein complex	1/1402	0.761203	1	EGP01578	EGP01578	1	--	0
Cellular component	GO:0010287	plastoglobule	4/1402	0.772821	4	EGP28044;novel.2026;EGP19362;EGP19984	EGP28044	1	novel.2026;EGP19362;EGP19984	3
Cellular component	GO:0005788	endoplasmic reticulum lumen	2/1402	0.774012	2	EGP05897;EGP10410	EGP05897;EGP10410	2	--	0
Cellular component	GO:0030660	Golgi-associated vesicle membrane	2/1402	0.774012	2	EGP00626;EGP00718	EGP00626	1	EGP00718	1
Cellular component	GO:0036452	ESCRT complex	2/1402	0.774012	2	novel.1585;EGP34470	EGP34470	1	novel.1585	1
Cellular component	GO:0000178	exosome (RNase complex)	1/1402	0.776953	1	novel.1560	novel.1560	1	--	0
Cellular component	GO:0005666	RNA polymerase III complex	1/1402	0.776953	1	EGP14750	--	0	EGP14750	1
Cellular component	GO:0009654	photosystem II oxygen evolving complex	1/1402	0.776953	1	EGP26095	EGP26095	1	--	0
Cellular component	GO:0005769	early endosome	3/1402	0.784463	3	EGP00626;EGP20714;EGP31804	EGP00626	1	EGP20714;EGP31804	2
Cellular component	GO:0099080	supramolecular complex	21/1402	0.787379	21	EGP18192;EGP18770;EGP13194;EGP03122;EGP05343;EGP15957;EGP28004;EGP10433;EGP07037;EGP01400;EGP33762;EGP30956;EGP18310;EGP20726;EGP13706;EGP17205;EGP11467;EGP01402;EGP01401;EGP00141;EGP29257	EGP05343;EGP28004;EGP10433;EGP07037;EGP01400;EGP30956;EGP20726;EGP13706;EGP17205;EGP11467;EGP01402;EGP01401;EGP00141	13	EGP18192;EGP18770;EGP13194;EGP03122;EGP15957;EGP33762;EGP18310;EGP29257	8
Cellular component	GO:0005689	U12-type spliceosomal complex	1/1402	0.791666	1	EGP13896	EGP13896	1	--	0
Cellular component	GO:1905354	exoribonuclease complex	1/1402	0.791666	1	novel.1560	novel.1560	1	--	0
Cellular component	GO:0009524	phragmoplast	7/1402	0.793664	7	EGP05343;EGP14030;EGP07037;EGP01400;EGP20726;EGP01402;EGP01401	EGP05343;EGP14030;EGP07037;EGP01400;EGP20726;EGP01402;EGP01401	7	--	0
Cellular component	GO:0005761	mitochondrial ribosome	1/1402	0.805408	1	novel.982	--	0	novel.982	1
Cellular component	GO:0005741	mitochondrial outer membrane	3/1402	0.818822	3	EGP26720;EGP22202;EGP12678	EGP26720;EGP22202;EGP12678	3	--	0
Cellular component	GO:0016602	CCAAT-binding factor complex	2/1402	0.833936	2	EGP00118;EGP02855	EGP00118	1	EGP02855	1
Cellular component	GO:0031305	integral component of mitochondrial inner membrane	1/1402	0.841435	1	EGP33363	EGP33363	1	--	0
Cellular component	GO:0098797	plasma membrane protein complex	2/1402	0.842401	2	novel.1575;EGP00718	--	0	novel.1575;EGP00718	2
Cellular component	GO:0005798	Golgi-associated vesicle	2/1402	0.850473	2	EGP00626;EGP00718	EGP00626	1	EGP00718	1
Cellular component	GO:0018995	host cellular component	1/1402	0.851897	1	EGP15057	EGP15057	1	--	0
Cellular component	GO:0031304	intrinsic component of mitochondrial inner membrane	1/1402	0.851897	1	EGP33363	EGP33363	1	--	0
Cellular component	GO:0043657	host cell	1/1402	0.851897	1	EGP15057	EGP15057	1	--	0
Cellular component	GO:0005759	mitochondrial matrix	7/1402	0.853859	7	EGP14208;EGP25428;EGP10384;novel.982;EGP13595;EGP25423;EGP22956	EGP25428;EGP25423	2	EGP14208;EGP10384;novel.982;EGP13595;EGP22956	5
Cellular component	GO:0031301	integral component of organelle membrane	9/1402	0.854436	9	EGP12462;EGP32463;EGP08904;EGP23937;EGP32309;EGP33363;EGP32311;EGP13435;EGP31009	EGP12462;EGP32309;EGP33363;EGP13435;EGP31009	5	EGP32463;EGP08904;EGP23937;EGP32311	4
Cellular component	GO:0030136	clathrin-coated vesicle	3/1402	0.85511	3	EGP00626;EGP06065;EGP00718	EGP00626;EGP06065	2	EGP00718	1
Cellular component	GO:0000137	Golgi cis cisterna	1/1402	0.861669	1	EGP28764	EGP28764	1	--	0
Cellular component	GO:0000313	organellar ribosome	1/1402	0.861669	1	novel.982	--	0	novel.982	1
Cellular component	GO:0034399	nuclear periphery	1/1402	0.861669	1	EGP05605	--	0	EGP05605	1
Cellular component	GO:0031300	intrinsic component of organelle membrane	9/1402	0.862785	9	EGP12462;EGP32463;EGP08904;EGP23937;EGP32309;EGP33363;EGP32311;EGP13435;EGP31009	EGP12462;EGP32309;EGP33363;EGP13435;EGP31009	5	EGP32463;EGP08904;EGP23937;EGP32311	4
Cellular component	GO:0030133	transport vesicle	3/1402	0.867746	3	EGP28230;EGP00626;EGP00718	EGP28230;EGP00626	2	EGP00718	1
Cellular component	GO:0030139	endocytic vesicle	1/1402	0.870796	1	EGP32367	--	0	EGP32367	1
Cellular component	GO:0030658	transport vesicle membrane	2/1402	0.879121	2	EGP00626;EGP00718	EGP00626	1	EGP00718	1
Cellular component	GO:0030118	clathrin coat	1/1402	0.879322	1	EGP00718	--	0	EGP00718	1
Cellular component	GO:0140534	endoplasmic reticulum protein-containing complex	3/1402	0.884876	3	EGP10536;novel.1520;novel.857	EGP10536;novel.1520;novel.857	3	--	0
Cellular component	GO:0009514	glyoxysome	1/1402	0.887285	1	EGP10670	EGP10670	1	--	0
Cellular component	GO:0016469	proton-transporting two-sector ATPase complex	4/1402	0.893871	4	EGP14223;novel.1520;novel.939;novel.1511	novel.1520	1	EGP14223;novel.939;novel.1511	3
Cellular component	GO:0080008	Cul4-RING E3 ubiquitin ligase complex	4/1402	0.893871	4	EGP28117;novel.1605;EGP30198;EGP30199	EGP28117	1	novel.1605;EGP30198;EGP30199	3
Cellular component	GO:0000152	nuclear ubiquitin ligase complex	1/1402	0.894723	1	EGP20291	--	0	EGP20291	1
Cellular component	GO:0016592	mediator complex	3/1402	0.895168	3	EGP17922;novel.1855;EGP23801	EGP17922;novel.1855	2	EGP23801	1
Cellular component	GO:0031965	nuclear membrane	2/1402	0.902621	2	EGP08897;EGP27696	EGP08897	1	EGP27696	1
Cellular component	GO:0000794	condensed nuclear chromosome	1/1402	0.908161	1	EGP10090	EGP10090	1	--	0
Cellular component	GO:0009504	cell plate	1/1402	0.908161	1	EGP00714	EGP00714	1	--	0
Cellular component	GO:0031461	cullin-RING ubiquitin ligase complex	9/1402	0.919165	9	EGP16692;EGP28117;EGP02497;EGP13932;EGP15937;EGP09831;novel.1605;EGP30198;EGP30199	EGP16692;EGP28117;EGP13932;EGP15937	4	EGP02497;EGP09831;novel.1605;EGP30198;EGP30199	5
Cellular component	GO:0005777	peroxisome	14/1402	0.921301	14	EGP10670;EGP01191;EGP28812;EGP28511;EGP28509;EGP33690;EGP01228;EGP30838;EGP08711;EGP12760;EGP26639;EGP30701;EGP30785;EGP19689	EGP10670;EGP01191;EGP28812;EGP33690;EGP30838;EGP08711;EGP12760;EGP30785;EGP19689	9	EGP28511;EGP28509;EGP01228;EGP26639;EGP30701	5
Cellular component	GO:0042579	microbody	14/1402	0.921301	14	EGP10670;EGP01191;EGP28812;EGP28511;EGP28509;EGP33690;EGP01228;EGP30838;EGP08711;EGP12760;EGP26639;EGP30701;EGP30785;EGP19689	EGP10670;EGP01191;EGP28812;EGP33690;EGP30838;EGP08711;EGP12760;EGP30785;EGP19689	9	EGP28511;EGP28509;EGP01228;EGP26639;EGP30701	5
Cellular component	GO:0099023	vesicle tethering complex	3/1402	0.941279	3	EGP14030;EGP16759;EGP32367	EGP14030;EGP16759	2	EGP32367	1
Cellular component	GO:1990204	oxidoreductase complex	4/1402	0.942513	4	EGP09193;EGP26095;EGP21129;novel.1421	EGP09193;EGP26095;EGP21129	3	novel.1421	1
Cellular component	GO:0005747	mitochondrial respiratory chain complex I	1/1402	0.943059	1	novel.1421	--	0	novel.1421	1
Cellular component	GO:0030964	NADH dehydrogenase complex	1/1402	0.943059	1	novel.1421	--	0	novel.1421	1
Cellular component	GO:0045271	respiratory chain complex I	1/1402	0.943059	1	novel.1421	--	0	novel.1421	1
Cellular component	GO:0048471	perinuclear region of cytoplasm	1/1402	0.943059	1	EGP04114	--	0	EGP04114	1
Cellular component	GO:0000793	condensed chromosome	2/1402	0.944012	2	EGP04675;EGP10090	EGP04675;EGP10090	2	--	0
Cellular component	GO:0031201	SNARE complex	1/1402	0.95033	1	EGP00714	EGP00714	1	--	0
Cellular component	GO:1904949	ATPase complex	1/1402	0.95361	1	EGP16251	EGP16251	1	--	0
Cellular component	GO:0000151	ubiquitin ligase complex	11/1402	0.955669	11	EGP16692;EGP28117;EGP02497;EGP13932;EGP15937;EGP09831;novel.1605;EGP30198;EGP30199;EGP10223;EGP20291	EGP16692;EGP28117;EGP13932;EGP15937;EGP10223	5	EGP02497;EGP09831;novel.1605;EGP30198;EGP30199;EGP20291	6
Cellular component	GO:0009523	photosystem II	3/1402	0.956491	3	EGP20623;EGP19984;EGP26095	EGP26095	1	EGP20623;EGP19984	2
Cellular component	GO:0019898	extrinsic component of membrane	3/1402	0.956491	3	EGP01384;EGP26278;EGP26095	EGP26278;EGP26095	2	EGP01384	1
Cellular component	GO:0042644	chloroplast nucleoid	1/1402	0.956673	1	EGP11580	EGP11580	1	--	0
Cellular component	GO:0042646	plastid nucleoid	1/1402	0.956673	1	EGP11580	EGP11580	1	--	0
Cellular component	GO:0000932	P-body	2/1402	0.957798	2	EGP13194;EGP33762	--	0	EGP13194;EGP33762	2
Cellular component	GO:0005856	cytoskeleton	22/1402	0.958227	22	EGP18192;EGP13270;EGP18770;EGP03122;EGP05343;EGP14030;EGP28004;EGP10433;EGP07037;EGP01400;EGP25835;EGP30956;EGP18310;EGP20726;EGP13706;EGP17205;EGP11467;EGP01402;EGP01401;EGP00141;EGP29257;EGP30679	EGP05343;EGP14030;EGP28004;EGP10433;EGP07037;EGP01400;EGP25835;EGP30956;EGP20726;EGP13706;EGP17205;EGP11467;EGP01402;EGP01401;EGP00141	15	EGP18192;EGP13270;EGP18770;EGP03122;EGP18310;EGP29257;EGP30679	7
Cellular component	GO:0000228	nuclear chromosome	4/1402	0.958259	4	EGP13379;EGP10090;EGP20739;EGP15437	EGP13379;EGP10090	2	EGP20739;EGP15437	2
Cellular component	GO:0032592	integral component of mitochondrial membrane	1/1402	0.959534	1	EGP33363	EGP33363	1	--	0
Cellular component	GO:0045261	proton-transporting ATP synthase complex, catalytic core F(1)	1/1402	0.959534	1	novel.1520	novel.1520	1	--	0
Cellular component	GO:0098573	intrinsic component of mitochondrial membrane	1/1402	0.959534	1	EGP33363	EGP33363	1	--	0
Cellular component	GO:0009706	chloroplast inner membrane	4/1402	0.961964	4	EGP16251;EGP11175;EGP34383;EGP31009	EGP16251;EGP11175;EGP34383;EGP31009	4	--	0
Cellular component	GO:0009528	plastid inner membrane	4/1402	0.965362	4	EGP16251;EGP11175;EGP34383;EGP31009	EGP16251;EGP11175;EGP34383;EGP31009	4	--	0
Cellular component	GO:0005819	spindle	3/1402	0.972545	3	EGP07037;EGP18310;EGP20726	EGP07037;EGP20726	2	EGP18310	1
Cellular component	GO:0071013	catalytic step 2 spliceosome	1/1402	0.973144	1	EGP28117	EGP28117	1	--	0
Cellular component	GO:0005778	peroxisomal membrane	1/1402	0.974918	1	EGP30785	EGP30785	1	--	0
Cellular component	GO:0031903	microbody membrane	1/1402	0.974918	1	EGP30785	EGP30785	1	--	0
Cellular component	GO:0098800	inner mitochondrial membrane protein complex	3/1402	0.976512	3	novel.1520;EGP13595;novel.1421	novel.1520	1	EGP13595;novel.1421	2
Cellular component	GO:0005643	nuclear pore	1/1402	0.976575	1	EGP25720	EGP25720	1	--	0
Cellular component	GO:0005684	U2-type spliceosomal complex	1/1402	0.976575	1	EGP28117	EGP28117	1	--	0
Cellular component	GO:0030120	vesicle coat	1/1402	0.976575	1	EGP00718	--	0	EGP00718	1
Cellular component	GO:0009522	photosystem I	1/1402	0.978123	1	EGP19984	--	0	EGP19984	1
Cellular component	GO:0009295	nucleoid	1/1402	0.979568	1	EGP11580	EGP11580	1	--	0
Cellular component	GO:0030662	coated vesicle membrane	2/1402	0.980064	2	EGP00626;EGP00718	EGP00626	1	EGP00718	1
Cellular component	GO:0033178	proton-transporting two-sector ATPase complex, catalytic domain	1/1402	0.983356	1	novel.1520	novel.1520	1	--	0
Cellular component	GO:0035770	ribonucleoprotein granule	2/1402	0.984231	2	EGP13194;EGP33762	--	0	EGP13194;EGP33762	2
Cellular component	GO:0036464	cytoplasmic ribonucleoprotein granule	2/1402	0.984231	2	EGP13194;EGP33762	--	0	EGP13194;EGP33762	2
Cellular component	GO:0005746	mitochondrial respirasome	1/1402	0.984456	1	novel.1421	--	0	novel.1421	1
Cellular component	GO:0005667	transcription regulator complex	5/1402	0.984899	5	EGP02828;EGP00118;EGP02855;EGP00423;EGP23801	EGP02828;EGP00118;EGP00423	3	EGP02855;EGP23801	2
Cellular component	GO:0019867	outer membrane	4/1402	0.985457	4	EGP26720;EGP22202;EGP02482;EGP12678	EGP26720;EGP22202;EGP12678	3	EGP02482	1
Cellular component	GO:0031968	organelle outer membrane	4/1402	0.985457	4	EGP26720;EGP22202;EGP02482;EGP12678	EGP26720;EGP22202;EGP12678	3	EGP02482	1
Cellular component	GO:0000307	cyclin-dependent protein kinase holoenzyme complex	1/1402	0.985483	1	EGP28222	EGP28222	1	--	0
Cellular component	GO:0015629	actin cytoskeleton	1/1402	0.986443	1	EGP17205	EGP17205	1	--	0
Cellular component	GO:0090575	RNA polymerase II transcription regulator complex	3/1402	0.986876	3	EGP00118;EGP02855;EGP00423	EGP00118;EGP00423	2	EGP02855	1
Cellular component	GO:0022625	cytosolic large ribosomal subunit	3/1402	0.987561	3	EGP15893;novel.1584;EGP34474	EGP15893	1	novel.1584;EGP34474	2
Cellular component	GO:0098803	respiratory chain complex	1/1402	0.9916	1	novel.1421	--	0	novel.1421	1
Cellular component	GO:0031966	mitochondrial membrane	16/1402	0.991729	16	EGP26720;EGP22202;EGP08925;EGP28004;novel.1575;EGP07609;EGP10253;novel.2011;novel.1520;EGP24154;EGP12678;EGP33363;EGP13595;EGP22956;novel.1421;novel.1511	EGP26720;EGP22202;EGP28004;EGP07609;EGP10253;novel.1520;EGP24154;EGP12678;EGP33363	9	EGP08925;novel.1575;novel.2011;EGP13595;EGP22956;novel.1421;novel.1511	7
Cellular component	GO:0098687	chromosomal region	2/1402	0.991787	2	EGP02454;EGP13609	EGP02454;EGP13609	2	--	0
Cellular component	GO:0070469	respirasome	2/1402	0.993537	2	EGP08925;novel.1421	--	0	EGP08925;novel.1421	2
Cellular component	GO:0000785	chromatin	10/1402	0.994184	10	EGP13379;EGP19307;EGP19255;EGP19849;EGP19847;EGP19848;EGP19302;EGP24307;novel.1398;EGP13609	EGP13379;EGP19307;EGP19302;novel.1398;EGP13609	5	EGP19255;EGP19849;EGP19847;EGP19848;EGP24307	5
Cellular component	GO:0009707	chloroplast outer membrane	1/1402	0.994428	1	EGP02482	--	0	EGP02482	1
Cellular component	GO:0000775	chromosome, centromeric region	1/1402	0.994796	1	EGP13609	EGP13609	1	--	0
Cellular component	GO:0009527	plastid outer membrane	1/1402	0.994796	1	EGP02482	--	0	EGP02482	1
Cellular component	GO:1902554	serine/threonine protein kinase complex	1/1402	0.994796	1	EGP28222	EGP28222	1	--	0
Cellular component	GO:0030659	cytoplasmic vesicle membrane	3/1402	0.9948	3	EGP00626;EGP00718;EGP18867	EGP00626	1	EGP00718;EGP18867	2
Cellular component	GO:0005740	mitochondrial envelope	16/1402	0.9952	16	EGP26720;EGP22202;EGP08925;EGP28004;novel.1575;EGP07609;EGP10253;novel.2011;novel.1520;EGP24154;EGP12678;EGP33363;EGP13595;EGP22956;novel.1421;novel.1511	EGP26720;EGP22202;EGP28004;EGP07609;EGP10253;novel.1520;EGP24154;EGP12678;EGP33363	9	EGP08925;novel.1575;novel.2011;EGP13595;EGP22956;novel.1421;novel.1511	7
Cellular component	GO:0009521	photosystem	3/1402	0.995345	3	EGP20623;EGP19984;EGP26095	EGP26095	1	EGP20623;EGP19984	2
Cellular component	GO:0005635	nuclear envelope	3/1402	0.995596	3	EGP08897;EGP25720;EGP27696	EGP08897;EGP25720	2	EGP27696	1
Cellular component	GO:0030135	coated vesicle	3/1402	0.995596	3	EGP00626;EGP06065;EGP00718	EGP00626;EGP06065	2	EGP00718	1
Cellular component	GO:0012506	vesicle membrane	3/1402	0.995834	3	EGP00626;EGP00718;EGP18867	EGP00626	1	EGP00718;EGP18867	2
Cellular component	GO:0016604	nuclear body	4/1402	0.995915	4	EGP19307;EGP06962;EGP30715;EGP19302	EGP19307;EGP06962;EGP19302	3	EGP30715	1
Cellular component	GO:0098798	mitochondrial protein-containing complex	4/1402	0.995915	4	novel.1520;novel.982;EGP13595;novel.1421	novel.1520	1	novel.982;EGP13595;novel.1421	3
Cellular component	GO:0022627	cytosolic small ribosomal subunit	1/1402	0.996304	1	EGP05675	--	0	EGP05675	1
Cellular component	GO:0032993	protein-DNA complex	3/1402	0.997484	3	EGP20739;novel.1398;EGP15437	novel.1398	1	EGP20739;EGP15437	2
Cellular component	GO:0030117	membrane coat	1/1402	0.997549	1	EGP00718	--	0	EGP00718	1
Cellular component	GO:0048475	coated membrane	1/1402	0.997549	1	EGP00718	--	0	EGP00718	1
Cellular component	GO:1902911	protein kinase complex	1/1402	0.997549	1	EGP28222	EGP28222	1	--	0
Cellular component	GO:0015934	large ribosomal subunit	4/1402	0.997708	4	EGP15893;novel.1584;EGP34474;novel.982	EGP15893	1	novel.1584;EGP34474;novel.982	3
Cellular component	GO:0000428	DNA-directed RNA polymerase complex	2/1402	0.998898	2	EGP11580;EGP14750	EGP11580	1	EGP14750	1
Cellular component	GO:0010008	endosome membrane	6/1402	0.998952	6	EGP10096;EGP08919;EGP13890;EGP19523;novel.1585;EGP34470	EGP10096;EGP19523;EGP34470	3	EGP08919;EGP13890;novel.1585	3
Cellular component	GO:0022626	cytosolic ribosome	5/1402	0.999177	5	EGP15893;novel.1584;EGP34474;EGP09953;EGP05675	EGP15893;EGP09953	2	novel.1584;EGP34474;EGP05675	3
Cellular component	GO:0000786	nucleosome	1/1402	0.999181	1	novel.1398	novel.1398	1	--	0
Cellular component	GO:0044815	DNA packaging complex	1/1402	0.999418	1	novel.1398	novel.1398	1	--	0
Cellular component	GO:0031969	chloroplast membrane	10/1402	0.99954	10	EGP04515;EGP20623;EGP02482;EGP16251;EGP11175;novel.1630;EGP05853;EGP31721;EGP34383;EGP31009	EGP16251;EGP11175;EGP31721;EGP34383;EGP31009	5	EGP04515;EGP20623;EGP02482;novel.1630;EGP05853	5
Cellular component	GO:0005743	mitochondrial inner membrane	8/1402	0.999544	8	EGP07609;novel.2011;novel.1520;EGP24154;EGP33363;EGP13595;EGP22956;novel.1421	EGP07609;novel.1520;EGP24154;EGP33363	4	novel.2011;EGP13595;EGP22956;novel.1421	4
Cellular component	GO:0042170	plastid membrane	10/1402	0.999664	10	EGP04515;EGP20623;EGP02482;EGP16251;EGP11175;novel.1630;EGP05853;EGP31721;EGP34383;EGP31009	EGP16251;EGP11175;EGP31721;EGP34383;EGP31009	5	EGP04515;EGP20623;EGP02482;novel.1630;EGP05853	5
Cellular component	GO:0016607	nuclear speck	1/1402	0.999707	1	EGP06962	EGP06962	1	--	0
Cellular component	GO:0015935	small ribosomal subunit	1/1402	0.999761	1	EGP05675	--	0	EGP05675	1
Cellular component	GO:0055029	nuclear DNA-directed RNA polymerase complex	1/1402	0.999806	1	EGP14750	--	0	EGP14750	1
Cellular component	GO:0030880	RNA polymerase complex	2/1402	0.999869	2	EGP11580;EGP14750	EGP11580	1	EGP14750	1
Cellular component	GO:0019866	organelle inner membrane	12/1402	0.999897	12	EGP16251;EGP11175;EGP07609;novel.2011;novel.1520;EGP24154;EGP33363;EGP13595;EGP22956;EGP34383;EGP31009;novel.1421	EGP16251;EGP11175;EGP07609;novel.1520;EGP24154;EGP33363;EGP34383;EGP31009	8	novel.2011;EGP13595;EGP22956;novel.1421	4
Cellular component	GO:0009535	chloroplast thylakoid membrane	14/1402	0.999959	14	EGP14223;EGP01597;EGP10339;EGP20623;EGP16430;novel.2026;EGP30936;novel.1367;novel.939;EGP00187;EGP19984;EGP28561;EGP23032;EGP26095	EGP10339;EGP30936;EGP23032;EGP26095	4	EGP14223;EGP01597;EGP20623;EGP16430;novel.2026;novel.1367;novel.939;EGP00187;EGP19984;EGP28561	10
Cellular component	GO:0055035	plastid thylakoid membrane	14/1402	0.999959	14	EGP14223;EGP01597;EGP10339;EGP20623;EGP16430;novel.2026;EGP30936;novel.1367;novel.939;EGP00187;EGP19984;EGP28561;EGP23032;EGP26095	EGP10339;EGP30936;EGP23032;EGP26095	4	EGP14223;EGP01597;EGP20623;EGP16430;novel.2026;novel.1367;novel.939;EGP00187;EGP19984;EGP28561	10
Cellular component	GO:0044391	ribosomal subunit	5/1402	0.999987	5	EGP15893;novel.1584;EGP34474;novel.982;EGP05675	EGP15893	1	novel.1584;EGP34474;novel.982;EGP05675	4
Cellular component	GO:0005681	spliceosomal complex	2/1402	0.999993	2	EGP28117;EGP13896	EGP28117;EGP13896	2	--	0
Cellular component	GO:0061695	transferase complex, transferring phosphorus-containing groups	3/1402	0.999998	3	EGP11580;EGP28222;EGP14750	EGP11580;EGP28222	2	EGP14750	1
Cellular component	GO:0005840	ribosome	10/1402	1	10	EGP15893;novel.1584;EGP34474;EGP09953;EGP07310;EGP25559;novel.982;novel.1912;EGP02720;EGP05675	EGP15893;EGP09953;EGP07310;EGP02720	4	novel.1584;EGP34474;EGP25559;novel.982;novel.1912;EGP05675	6
Cellular component	GO:0005654	nucleoplasm	8/1402	1	8	EGP19307;EGP19849;EGP19847;EGP06962;EGP19848;EGP30715;EGP19302;EGP12517	EGP19307;EGP06962;EGP19302	3	EGP19849;EGP19847;EGP19848;EGP30715;EGP12517	5
Biological process	GO:0036294	cellular response to decreased oxygen levels	36/1312	3.05234e-07	36	EGP09905;EGP22035;EGP31632;EGP28511;EGP10289;EGP29841;EGP28509;EGP31095;EGP12804;EGP31475;EGP09623;EGP15957;EGP23800;EGP00807;EGP10481;EGP17870;EGP13176;EGP09169;EGP16610;EGP24269;EGP02432;EGP28172;EGP05345;EGP26666;EGP26660;EGP14298;EGP14377;EGP26062;EGP24154;EGP28022;EGP31245;EGP13526;EGP08799;EGP31800;EGP23810;EGP31379	EGP09905;EGP22035;EGP31632;EGP10289;EGP29841;EGP31095;EGP12804;EGP09623;EGP10481;EGP17870;EGP13176;EGP09169;EGP16610;EGP26666;EGP14298;EGP26062;EGP24154;EGP28022;EGP31245;EGP13526;EGP08799;EGP31800;EGP23810	23	EGP28511;EGP28509;EGP31475;EGP15957;EGP23800;EGP00807;EGP24269;EGP02432;EGP28172;EGP05345;EGP26660;EGP14377;EGP31379	13
Biological process	GO:0071453	cellular response to oxygen levels	36/1312	3.05234e-07	36	EGP09905;EGP22035;EGP31632;EGP28511;EGP10289;EGP29841;EGP28509;EGP31095;EGP12804;EGP31475;EGP09623;EGP15957;EGP23800;EGP00807;EGP10481;EGP17870;EGP13176;EGP09169;EGP16610;EGP24269;EGP02432;EGP28172;EGP05345;EGP26666;EGP26660;EGP14298;EGP14377;EGP26062;EGP24154;EGP28022;EGP31245;EGP13526;EGP08799;EGP31800;EGP23810;EGP31379	EGP09905;EGP22035;EGP31632;EGP10289;EGP29841;EGP31095;EGP12804;EGP09623;EGP10481;EGP17870;EGP13176;EGP09169;EGP16610;EGP26666;EGP14298;EGP26062;EGP24154;EGP28022;EGP31245;EGP13526;EGP08799;EGP31800;EGP23810	23	EGP28511;EGP28509;EGP31475;EGP15957;EGP23800;EGP00807;EGP24269;EGP02432;EGP28172;EGP05345;EGP26660;EGP14377;EGP31379	13
Biological process	GO:0071456	cellular response to hypoxia	35/1312	5.53876e-07	35	EGP09905;EGP22035;EGP31632;EGP28511;EGP10289;EGP29841;EGP28509;EGP31095;EGP12804;EGP31475;EGP09623;EGP23800;EGP00807;EGP10481;EGP17870;EGP13176;EGP09169;EGP16610;EGP24269;EGP02432;EGP28172;EGP05345;EGP26666;EGP26660;EGP14298;EGP14377;EGP26062;EGP24154;EGP28022;EGP31245;EGP13526;EGP08799;EGP31800;EGP23810;EGP31379	EGP09905;EGP22035;EGP31632;EGP10289;EGP29841;EGP31095;EGP12804;EGP09623;EGP10481;EGP17870;EGP13176;EGP09169;EGP16610;EGP26666;EGP14298;EGP26062;EGP24154;EGP28022;EGP31245;EGP13526;EGP08799;EGP31800;EGP23810	23	EGP28511;EGP28509;EGP31475;EGP23800;EGP00807;EGP24269;EGP02432;EGP28172;EGP05345;EGP26660;EGP14377;EGP31379	12
Biological process	GO:0036293	response to decreased oxygen levels	39/1312	7.82951e-07	39	EGP13468;EGP09905;EGP22035;EGP31632;EGP28511;EGP10289;EGP29841;EGP28509;EGP31095;EGP12804;EGP31475;EGP09623;EGP15957;EGP23800;EGP00807;EGP10481;EGP17870;EGP13176;EGP09169;EGP16610;EGP24269;EGP02432;EGP28172;EGP05345;EGP26666;EGP26660;EGP14298;EGP14377;EGP20751;EGP26062;EGP24154;EGP28022;EGP05759;EGP31245;EGP13526;EGP08799;EGP31800;EGP23810;EGP31379	EGP13468;EGP09905;EGP22035;EGP31632;EGP10289;EGP29841;EGP31095;EGP12804;EGP09623;EGP10481;EGP17870;EGP13176;EGP09169;EGP16610;EGP26666;EGP14298;EGP26062;EGP24154;EGP28022;EGP31245;EGP13526;EGP08799;EGP31800;EGP23810	24	EGP28511;EGP28509;EGP31475;EGP15957;EGP23800;EGP00807;EGP24269;EGP02432;EGP28172;EGP05345;EGP26660;EGP14377;EGP20751;EGP05759;EGP31379	15
Biological process	GO:0070482	response to oxygen levels	39/1312	8.69113e-07	39	EGP13468;EGP09905;EGP22035;EGP31632;EGP28511;EGP10289;EGP29841;EGP28509;EGP31095;EGP12804;EGP31475;EGP09623;EGP15957;EGP23800;EGP00807;EGP10481;EGP17870;EGP13176;EGP09169;EGP16610;EGP24269;EGP02432;EGP28172;EGP05345;EGP26666;EGP26660;EGP14298;EGP14377;EGP20751;EGP26062;EGP24154;EGP28022;EGP05759;EGP31245;EGP13526;EGP08799;EGP31800;EGP23810;EGP31379	EGP13468;EGP09905;EGP22035;EGP31632;EGP10289;EGP29841;EGP31095;EGP12804;EGP09623;EGP10481;EGP17870;EGP13176;EGP09169;EGP16610;EGP26666;EGP14298;EGP26062;EGP24154;EGP28022;EGP31245;EGP13526;EGP08799;EGP31800;EGP23810	24	EGP28511;EGP28509;EGP31475;EGP15957;EGP23800;EGP00807;EGP24269;EGP02432;EGP28172;EGP05345;EGP26660;EGP14377;EGP20751;EGP05759;EGP31379	15
Biological process	GO:0001666	response to hypoxia	38/1312	1.37638e-06	38	EGP13468;EGP09905;EGP22035;EGP31632;EGP28511;EGP10289;EGP29841;EGP28509;EGP31095;EGP12804;EGP31475;EGP09623;EGP23800;EGP00807;EGP10481;EGP17870;EGP13176;EGP09169;EGP16610;EGP24269;EGP02432;EGP28172;EGP05345;EGP26666;EGP26660;EGP14298;EGP14377;EGP20751;EGP26062;EGP24154;EGP28022;EGP05759;EGP31245;EGP13526;EGP08799;EGP31800;EGP23810;EGP31379	EGP13468;EGP09905;EGP22035;EGP31632;EGP10289;EGP29841;EGP31095;EGP12804;EGP09623;EGP10481;EGP17870;EGP13176;EGP09169;EGP16610;EGP26666;EGP14298;EGP26062;EGP24154;EGP28022;EGP31245;EGP13526;EGP08799;EGP31800;EGP23810	24	EGP28511;EGP28509;EGP31475;EGP23800;EGP00807;EGP24269;EGP02432;EGP28172;EGP05345;EGP26660;EGP14377;EGP20751;EGP05759;EGP31379	14
Biological process	GO:1990748	cellular detoxification	10/1312	1.80612e-05	10	EGP04328;EGP28179;EGP18914;EGP14516;EGP32018;novel.1002;EGP13615;EGP28180;EGP10930;EGP10931	EGP28179;EGP18914;EGP14516;EGP13615	4	EGP04328;EGP32018;novel.1002;EGP28180;EGP10930;EGP10931	6
Biological process	GO:0008202	steroid metabolic process	22/1312	2.43253e-05	22	EGP31512;EGP26007;EGP18943;EGP26804;EGP02677;EGP28478;EGP15709;EGP26805;EGP20936;EGP04887;EGP30737;EGP01200;EGP00513;EGP01206;EGP26802;EGP28561;EGP18867;EGP30785;EGP13435;EGP31128;EGP19389;EGP31050	EGP31512;EGP26007;EGP18943;EGP26804;EGP02677;EGP28478;EGP15709;EGP26805;EGP04887;EGP30737;EGP01200;EGP01206;EGP26802;EGP30785;EGP13435;EGP31128	16	EGP20936;EGP00513;EGP28561;EGP18867;EGP19389;EGP31050	6
Biological process	GO:0016125	sterol metabolic process	19/1312	3.02554e-05	19	EGP31512;EGP18943;EGP26804;EGP02677;EGP28478;EGP15709;EGP26805;EGP20936;EGP04887;EGP30737;EGP00513;EGP26802;EGP28561;EGP18867;EGP30785;EGP13435;EGP31128;EGP19389;EGP31050	EGP31512;EGP18943;EGP26804;EGP02677;EGP28478;EGP15709;EGP26805;EGP04887;EGP30737;EGP26802;EGP30785;EGP13435;EGP31128	13	EGP20936;EGP00513;EGP28561;EGP18867;EGP19389;EGP31050	6
Biological process	GO:0016042	lipid catabolic process	40/1312	3.72285e-05	40	EGP28298;EGP28511;EGP31207;EGP28509;EGP04515;EGP33690;EGP30387;EGP31366;EGP12959;EGP21207;EGP29927;EGP28478;EGP30355;EGP12842;EGP03077;EGP30362;EGP30385;EGP30034;EGP20936;novel.186;EGP25951;EGP29901;EGP10631;EGP19751;EGP22648;EGP29783;EGP19362;EGP31404;EGP03182;EGP09605;EGP12843;EGP03376;EGP29483;EGP16881;EGP12507;EGP21822;EGP31367;EGP02151;EGP21903;EGP19389	EGP28298;EGP31207;EGP33690;EGP30387;EGP31366;EGP12959;EGP21207;EGP29927;EGP28478;EGP30355;EGP03077;EGP30362;EGP30385;novel.186;EGP25951;EGP29901;EGP10631;EGP22648;EGP29783;EGP31404;EGP03182;EGP09605;EGP29483;EGP12507;EGP21822;EGP31367;EGP02151;EGP21903	28	EGP28511;EGP28509;EGP04515;EGP12842;EGP30034;EGP20936;EGP19751;EGP19362;EGP12843;EGP03376;EGP16881;EGP19389	12
Biological process	GO:0019748	secondary metabolic process	50/1312	5.06842e-05	50	EGP24622;EGP10904;EGP30699;EGP07168;EGP28453;EGP28298;EGP31207;EGP06277;EGP13932;EGP16108;EGP21398;EGP16631;EGP25962;EGP09863;EGP08904;EGP02432;EGP30711;EGP07337;EGP18102;EGP30989;EGP00076;novel.2017;EGP06849;EGP09831;EGP23937;EGP31351;EGP31114;EGP24248;EGP24362;novel.2410;EGP10888;EGP25951;EGP31025;EGP09921;EGP32252;novel.1516;EGP29829;EGP31350;EGP16209;EGP19885;EGP10724;EGP13251;EGP16583;EGP307…	EGP24622;EGP10904;EGP30699;EGP07168;EGP28298;EGP31207;EGP06277;EGP13932;EGP21398;EGP16631;EGP09863;EGP07337;EGP18102;EGP06849;EGP31351;EGP31114;EGP24362;novel.2410;EGP25951;EGP09921;EGP32252;EGP29829;EGP31350;EGP16583;EGP22548;EGP26512;EGP09347;EGP28552	28	EGP28453;EGP16108;EGP25962;EGP08904;EGP02432;EGP30711;EGP30989;EGP00076;novel.2017;EGP09831;EGP23937;EGP24248;EGP10888;EGP31025;novel.1516;EGP16209;EGP19885;EGP10724;EGP13251;EGP30701;EGP18016;EGP16106	22
Biological process	GO:0097237	cellular response to toxic substance	10/1312	6.13112e-05	10	EGP04328;EGP28179;EGP18914;EGP14516;EGP32018;novel.1002;EGP13615;EGP28180;EGP10930;EGP10931	EGP28179;EGP18914;EGP14516;EGP13615	4	EGP04328;EGP32018;novel.1002;EGP28180;EGP10930;EGP10931	6
Biological process	GO:0043455	regulation of secondary metabolic process	17/1312	0.000126231	17	EGP07168;EGP28298;EGP31207;EGP13932;EGP21398;EGP02432;EGP30711;EGP06849;EGP09831;EGP25951;EGP09921;EGP16209;EGP19885;EGP10724;EGP22548;EGP26512;EGP09347	EGP07168;EGP28298;EGP31207;EGP13932;EGP21398;EGP06849;EGP25951;EGP09921;EGP22548;EGP26512;EGP09347	11	EGP02432;EGP30711;EGP09831;EGP16209;EGP19885;EGP10724	6
Biological process	GO:0098754	detoxification	12/1312	0.00015606	12	EGP04328;EGP30699;EGP28179;EGP18914;EGP14516;EGP32018;EGP18102;novel.1002;EGP13615;EGP28180;EGP10930;EGP10931	EGP30699;EGP28179;EGP18914;EGP14516;EGP18102;EGP13615	6	EGP04328;EGP32018;novel.1002;EGP28180;EGP10930;EGP10931	6
Biological process	GO:0010371	regulation of gibberellin biosynthetic process	6/1312	0.000186544	6	EGP28298;EGP31207;EGP25951;EGP09921;EGP19885;EGP26512	EGP28298;EGP31207;EGP25951;EGP09921;EGP26512	5	EGP19885	1
Biological process	GO:0009625	response to insect	12/1312	0.000189344	12	EGP02760;EGP16108;EGP13603;novel.2410;EGP05062;EGP18386;EGP22357;EGP31078;EGP31080;EGP21655;EGP18457;EGP16106	EGP13603;novel.2410;EGP05062;EGP21655;EGP18457	5	EGP02760;EGP16108;EGP18386;EGP22357;EGP31078;EGP31080;EGP16106	7
Biological process	GO:0031408	oxylipin biosynthetic process	11/1312	0.000208165	11	EGP28511;EGP28509;EGP09644;EGP26804;EGP12316;EGP05633;EGP26805;EGP20723;EGP28658;EGP26802;EGP28561	EGP26804;EGP05633;EGP26805;EGP20723;EGP26802	5	EGP28511;EGP28509;EGP09644;EGP12316;EGP28658;EGP28561	6
Biological process	GO:0010817	regulation of hormone levels	42/1312	0.000219083	42	EGP31512;EGP26007;EGP19886;novel.1548;EGP04614;EGP10096;EGP22231;EGP16108;EGP28715;EGP10512;EGP20044;EGP13537;EGP26198;EGP20714;EGP26196;EGP24326;EGP04887;novel.2410;EGP25924;EGP30737;EGP13890;EGP21306;EGP01682;EGP09200;EGP30688;EGP08909;EGP05419;EGP27005;EGP25925;EGP28373;EGP00513;EGP09203;EGP19523;EGP14515;novel.700;EGP06227;EGP18867;EGP02387;EGP09666;EGP13435;EGP31050;EGP16106	EGP31512;EGP26007;EGP19886;EGP04614;EGP10096;EGP28715;EGP10512;EGP13537;EGP26198;EGP26196;EGP04887;novel.2410;EGP30737;EGP21306;EGP01682;EGP09200;EGP08909;EGP05419;EGP27005;EGP09203;EGP19523;EGP06227;EGP13435	23	novel.1548;EGP22231;EGP16108;EGP20044;EGP20714;EGP24326;EGP25924;EGP13890;EGP30688;EGP25925;EGP28373;EGP00513;EGP14515;novel.700;EGP18867;EGP02387;EGP09666;EGP31050;EGP16106	19
Biological process	GO:0031407	oxylipin metabolic process	11/1312	0.000255187	11	EGP28511;EGP28509;EGP09644;EGP26804;EGP12316;EGP05633;EGP26805;EGP20723;EGP28658;EGP26802;EGP28561	EGP26804;EGP05633;EGP26805;EGP20723;EGP26802	5	EGP28511;EGP28509;EGP09644;EGP12316;EGP28658;EGP28561	6
Biological process	GO:0008300	isoprenoid catabolic process	8/1312	0.000418319	8	EGP28298;EGP31207;EGP28478;EGP20936;EGP25951;EGP19751;EGP19362;EGP19389	EGP28298;EGP31207;EGP28478;EGP25951	4	EGP20936;EGP19751;EGP19362;EGP19389	4
Biological process	GO:0006878	cellular copper ion homeostasis	6/1312	0.000643475	6	EGP07130;EGP18914;EGP14970;novel.1002;EGP31143;EGP15718	EGP07130;EGP18914;EGP14970;EGP31143;EGP15718	5	novel.1002	1
Biological process	GO:0098869	cellular oxidant detoxification	6/1312	0.000643475	6	EGP04328;EGP18914;EGP32018;novel.1002;EGP10930;EGP10931	EGP18914	1	EGP04328;EGP32018;novel.1002;EGP10930;EGP10931	5
Biological process	GO:0046942	carboxylic acid transport	15/1312	0.000751965	15	EGP06737;novel.1932;EGP09449;EGP14277;EGP13540;EGP13201;EGP03045;EGP24154;EGP15134;EGP10470;EGP03376;EGP31721;EGP33363;EGP02151;EGP31781	EGP09449;EGP14277;EGP13540;EGP24154;EGP10470;EGP31721;EGP33363;EGP02151	8	EGP06737;novel.1932;EGP13201;EGP03045;EGP15134;EGP03376;EGP31781	7
Biological process	GO:1900140	regulation of seedling development	18/1312	0.000779788	18	EGP05394;EGP32996;EGP30387;EGP11627;EGP15862;EGP29927;EGP10195;novel.2203;EGP30362;EGP10981;EGP31068;EGP13860;EGP17008;EGP04011;EGP21606;EGP21903;EGP26512;EGP10982	EGP05394;EGP32996;EGP30387;EGP11627;EGP29927;EGP10195;EGP30362;EGP10981;EGP31068;EGP17008;EGP21606;EGP21903;EGP26512	13	EGP15862;novel.2203;EGP13860;EGP04011;EGP10982	5
Biological process	GO:0016115	terpenoid catabolic process	6/1312	0.000909786	6	EGP28298;EGP31207;EGP28478;EGP20936;EGP25951;EGP19389	EGP28298;EGP31207;EGP28478;EGP25951	4	EGP20936;EGP19389	2
Biological process	GO:0120254	olefinic compound metabolic process	20/1312	0.000923265	20	EGP24622;EGP07168;EGP06277;EGP01662;EGP31370;EGP30711;EGP28478;EGP28165;novel.2017;EGP21024;EGP29671;EGP31232;EGP20936;EGP31178;EGP10724;EGP18890;EGP30701;EGP22548;EGP19389;EGP00925	EGP24622;EGP07168;EGP06277;EGP01662;EGP28478;EGP28165;EGP29671;EGP31232;EGP31178;EGP22548	10	EGP31370;EGP30711;novel.2017;EGP21024;EGP20936;EGP10724;EGP18890;EGP30701;EGP19389;EGP00925	10
Biological process	GO:0016129	phytosteroid biosynthetic process	7/1312	0.00109734	7	EGP31512;EGP26007;EGP04887;EGP00513;EGP18867;EGP13435;EGP31050	EGP31512;EGP26007;EGP04887;EGP13435	4	EGP00513;EGP18867;EGP31050	3
Biological process	GO:0016132	brassinosteroid biosynthetic process	7/1312	0.00109734	7	EGP31512;EGP26007;EGP04887;EGP00513;EGP18867;EGP13435;EGP31050	EGP31512;EGP26007;EGP04887;EGP13435	4	EGP00513;EGP18867;EGP31050	3
Biological process	GO:0120178	steroid hormone biosynthetic process	7/1312	0.00109734	7	EGP31512;EGP26007;EGP04887;EGP00513;EGP18867;EGP13435;EGP31050	EGP31512;EGP26007;EGP04887;EGP13435	4	EGP00513;EGP18867;EGP31050	3
Biological process	GO:0010393	galacturonan metabolic process	28/1312	0.00115586	28	EGP15975;EGP02033;EGP28160;EGP10096;EGP09617;EGP11471;EGP28574;EGP16225;EGP25999;EGP22915;EGP00235;EGP30962;EGP07298;EGP21392;EGP04541;EGP20751;EGP05701;EGP09616;EGP13071;EGP21950;EGP13890;EGP00234;EGP24851;EGP31455;EGP33662;EGP33659;EGP19523;EGP24557	EGP15975;EGP02033;EGP28160;EGP10096;EGP28574;EGP16225;EGP25999;EGP22915;EGP00235;EGP30962;EGP07298;EGP21392;EGP04541;EGP05701;EGP09616;EGP13071;EGP00234;EGP24851;EGP31455;EGP33662;EGP19523	21	EGP09617;EGP11471;EGP20751;EGP21950;EGP13890;EGP33659;EGP24557	7
Biological process	GO:0010029	regulation of seed germination	16/1312	0.00130988	16	EGP05394;EGP32996;EGP30387;EGP11627;EGP15862;EGP29927;EGP10195;novel.2203;EGP30362;EGP31068;EGP13860;EGP17008;EGP04011;EGP21606;EGP21903;EGP26512	EGP05394;EGP32996;EGP30387;EGP11627;EGP29927;EGP10195;EGP30362;EGP31068;EGP17008;EGP21606;EGP21903;EGP26512	12	EGP15862;novel.2203;EGP13860;EGP04011	4
Biological process	GO:0045490	pectin catabolic process	16/1312	0.00130988	16	EGP15975;EGP02033;EGP09617;EGP16225;EGP22915;EGP00235;EGP30962;EGP07298;EGP04541;EGP05701;EGP09616;EGP13071;EGP00234;EGP33662;EGP33659;EGP24557	EGP15975;EGP02033;EGP16225;EGP22915;EGP00235;EGP30962;EGP07298;EGP04541;EGP05701;EGP09616;EGP13071;EGP00234;EGP33662	13	EGP09617;EGP33659;EGP24557	3
Biological process	GO:0016137	glycoside metabolic process	8/1312	0.00137718	8	EGP07113;EGP28165;EGP19187;EGP01201;EGP19186;EGP31178;EGP14291;EGP14292	EGP28165;EGP19187;EGP01201;EGP19186;EGP31178;EGP14291;EGP14292	7	EGP07113	1
Biological process	GO:0010114	response to red light	11/1312	0.00144347	11	EGP16108;EGP31370;EGP15862;EGP21891;novel.2410;novel.2235;EGP21908;EGP20185;EGP31080;EGP26512;EGP16106	EGP21891;novel.2410;EGP21908;EGP26512	4	EGP16108;EGP31370;EGP15862;novel.2235;EGP20185;EGP31080;EGP16106	7
Biological process	GO:0009626	plant-type hypersensitive response	48/1312	0.00149537	48	EGP16102;EGP07180;EGP06838;EGP16100;EGP07189;EGP25447;EGP26720;EGP26179;EGP28511;EGP02794;novel.433;EGP28509;EGP07178;EGP07185;EGP22202;EGP09381;EGP07254;EGP23798;novel.507;EGP26674;EGP23787;EGP03416;EGP03417;EGP12652;EGP15597;EGP02938;EGP21890;EGP07248;EGP03415;EGP22444;EGP09391;EGP23797;EGP09385;EGP22223;EGP26191;EGP15856;EGP12678;EGP27814;EGP26278;novel.643;EGP07182;EGP23799;novel.36;EGP02928;…	EGP07180;EGP06838;EGP16100;EGP07189;EGP26720;EGP02794;EGP07178;EGP07185;EGP22202;EGP07254;EGP23798;EGP26674;EGP23787;EGP03416;EGP03417;EGP12652;EGP02938;EGP21890;EGP07248;EGP03415;EGP22444;EGP23797;EGP15856;EGP12678;EGP27814;EGP26278;EGP07182;EGP23799;novel.36;EGP02928;novel.666;EGP05878	32	EGP16102;EGP25447;EGP26179;EGP28511;novel.433;EGP28509;EGP09381;novel.507;EGP15597;EGP09391;EGP09385;EGP22223;EGP26191;novel.643;EGP05880;EGP23481	16
Biological process	GO:0034050	programmed cell death induced by symbiont	48/1312	0.00149537	48	EGP16102;EGP07180;EGP06838;EGP16100;EGP07189;EGP25447;EGP26720;EGP26179;EGP28511;EGP02794;novel.433;EGP28509;EGP07178;EGP07185;EGP22202;EGP09381;EGP07254;EGP23798;novel.507;EGP26674;EGP23787;EGP03416;EGP03417;EGP12652;EGP15597;EGP02938;EGP21890;EGP07248;EGP03415;EGP22444;EGP09391;EGP23797;EGP09385;EGP22223;EGP26191;EGP15856;EGP12678;EGP27814;EGP26278;novel.643;EGP07182;EGP23799;novel.36;EGP02928;…	EGP07180;EGP06838;EGP16100;EGP07189;EGP26720;EGP02794;EGP07178;EGP07185;EGP22202;EGP07254;EGP23798;EGP26674;EGP23787;EGP03416;EGP03417;EGP12652;EGP02938;EGP21890;EGP07248;EGP03415;EGP22444;EGP23797;EGP15856;EGP12678;EGP27814;EGP26278;EGP07182;EGP23799;novel.36;EGP02928;novel.666;EGP05878	32	EGP16102;EGP25447;EGP26179;EGP28511;novel.433;EGP28509;EGP09381;novel.507;EGP15597;EGP09391;EGP09385;EGP22223;EGP26191;novel.643;EGP05880;EGP23481	16
Biological process	GO:0010411	xyloglucan metabolic process	10/1312	0.00150669	10	EGP18419;EGP00919;EGP31225;EGP11409;EGP02234;EGP12766;EGP11314;EGP11626;EGP23619;EGP06204	EGP18419;EGP00919;EGP31225;EGP12766;EGP23619;EGP06204	6	EGP11409;EGP02234;EGP11314;EGP11626	4
Biological process	GO:0006721	terpenoid metabolic process	36/1312	0.00158728	36	EGP28582;EGP07168;EGP28298;EGP30586;EGP31207;EGP07113;EGP31370;EGP15977;EGP30711;EGP28478;EGP25484;EGP18960;EGP28165;EGP12504;EGP00885;EGP11294;EGP20936;EGP04887;EGP31416;EGP16069;EGP25951;EGP09921;EGP19751;EGP16620;EGP14245;EGP26966;EGP05822;EGP31178;EGP19885;EGP31078;EGP10724;EGP33822;EGP18890;EGP22548;EGP26512;EGP19389	EGP07168;EGP28298;EGP30586;EGP31207;EGP15977;EGP28478;EGP28165;EGP04887;EGP16069;EGP25951;EGP09921;EGP14245;EGP26966;EGP05822;EGP31178;EGP33822;EGP22548;EGP26512	18	EGP28582;EGP07113;EGP31370;EGP30711;EGP25484;EGP18960;EGP12504;EGP00885;EGP11294;EGP20936;EGP31416;EGP19751;EGP16620;EGP19885;EGP31078;EGP10724;EGP18890;EGP19389	18
Biological process	GO:0055070	copper ion homeostasis	6/1312	0.0016881	6	EGP07130;EGP18914;EGP14970;novel.1002;EGP31143;EGP15718	EGP07130;EGP18914;EGP14970;EGP31143;EGP15718	5	novel.1002	1
Biological process	GO:0050826	response to freezing	8/1312	0.0016946	8	EGP05062;EGP18386;EGP22357;EGP27510;EGP32309;EGP32311;EGP21655;EGP12902	EGP05062;EGP32309;EGP21655;EGP12902	4	EGP18386;EGP22357;EGP27510;EGP32311	4
Biological process	GO:0046339	diacylglycerol metabolic process	5/1312	0.00175032	5	EGP30387;EGP29927;EGP30362;EGP21903;EGP31009	EGP30387;EGP29927;EGP30362;EGP21903;EGP31009	5	--	0
Biological process	GO:0042546	cell wall biogenesis	34/1312	0.00182448	34	EGP31337;EGP18419;EGP10901;EGP28160;EGP00919;EGP31225;EGP06299;EGP27962;EGP28574;EGP08658;EGP11409;EGP02234;EGP12766;EGP14030;EGP11314;EGP16394;EGP06849;EGP11626;EGP28487;EGP04116;EGP06555;EGP00220;EGP01207;EGP10319;EGP23619;EGP18474;EGP31455;EGP23428;EGP18341;EGP28106;EGP21647;EGP06204;EGP09347;EGP18016	EGP31337;EGP18419;EGP28160;EGP00919;EGP31225;EGP06299;EGP27962;EGP28574;EGP08658;EGP12766;EGP14030;EGP06849;EGP28487;EGP06555;EGP00220;EGP01207;EGP10319;EGP23619;EGP31455;EGP23428;EGP28106;EGP21647;EGP06204;EGP09347	24	EGP10901;EGP11409;EGP02234;EGP11314;EGP16394;EGP11626;EGP04116;EGP18474;EGP18341;EGP18016	10
Biological process	GO:0006720	isoprenoid metabolic process	41/1312	0.0018532	41	EGP28582;EGP07168;EGP28298;EGP30586;EGP31207;EGP07113;EGP31370;EGP08904;EGP15977;EGP30711;EGP28478;EGP25484;EGP18960;EGP28165;EGP12504;EGP23937;EGP00885;EGP11294;EGP20936;EGP04887;EGP31416;EGP16069;EGP25951;EGP09921;EGP19751;EGP16620;EGP14245;EGP19362;EGP26966;EGP05822;EGP31178;EGP19885;EGP00187;EGP31078;EGP10724;EGP33822;EGP18890;EGP22548;EGP26512;EGP30785;EGP19389	EGP07168;EGP28298;EGP30586;EGP31207;EGP15977;EGP28478;EGP28165;EGP04887;EGP16069;EGP25951;EGP09921;EGP14245;EGP26966;EGP05822;EGP31178;EGP33822;EGP22548;EGP26512;EGP30785	19	EGP28582;EGP07113;EGP31370;EGP08904;EGP30711;EGP25484;EGP18960;EGP12504;EGP23937;EGP00885;EGP11294;EGP20936;EGP31416;EGP19751;EGP16620;EGP19362;EGP19885;EGP00187;EGP31078;EGP10724;EGP18890;EGP19389	22
Biological process	GO:0051702	biological process involved in interaction with symbiont	48/1312	0.00187549	48	EGP16102;EGP07180;EGP06838;EGP16100;EGP07189;EGP25447;EGP26720;EGP26179;EGP28511;EGP02794;novel.433;EGP28509;EGP07178;EGP07185;EGP22202;EGP09381;EGP07254;EGP23798;novel.507;EGP26674;EGP23787;EGP03416;EGP03417;EGP12652;EGP15597;EGP02938;EGP21890;EGP07248;EGP03415;EGP22444;EGP09391;EGP23797;EGP09385;EGP22223;EGP26191;EGP15856;EGP12678;EGP27814;EGP26278;novel.643;EGP07182;EGP23799;novel.36;EGP02928;…	EGP07180;EGP06838;EGP16100;EGP07189;EGP26720;EGP02794;EGP07178;EGP07185;EGP22202;EGP07254;EGP23798;EGP26674;EGP23787;EGP03416;EGP03417;EGP12652;EGP02938;EGP21890;EGP07248;EGP03415;EGP22444;EGP23797;EGP15856;EGP12678;EGP27814;EGP26278;EGP07182;EGP23799;novel.36;EGP02928;novel.666;EGP05878	32	EGP16102;EGP25447;EGP26179;EGP28511;novel.433;EGP28509;EGP09381;novel.507;EGP15597;EGP09391;EGP09385;EGP22223;EGP26191;novel.643;EGP05880;EGP23481	16
Biological process	GO:0042545	cell wall modification	21/1312	0.00200538	21	EGP15975;EGP02033;EGP09617;EGP28574;EGP25999;EGP16108;EGP05097;EGP00235;EGP30962;EGP07298;EGP21392;EGP04541;EGP06773;EGP11626;EGP05701;EGP09616;novel.2410;EGP00234;EGP31455;EGP33659;EGP16106	EGP15975;EGP02033;EGP28574;EGP25999;EGP05097;EGP00235;EGP30962;EGP07298;EGP21392;EGP04541;EGP06773;EGP05701;EGP09616;novel.2410;EGP00234;EGP31455	16	EGP09617;EGP16108;EGP11626;EGP33659;EGP16106	5
Biological process	GO:0042445	hormone metabolic process	25/1312	0.00201845	25	EGP31512;EGP26007;novel.1548;EGP16108;EGP28715;EGP20044;EGP26198;EGP20714;EGP26196;EGP24326;EGP04887;novel.2410;EGP21306;EGP09200;EGP30688;EGP08909;EGP28373;EGP00513;EGP09203;novel.700;EGP06227;EGP18867;EGP13435;EGP31050;EGP16106	EGP31512;EGP26007;EGP28715;EGP26198;EGP26196;EGP04887;novel.2410;EGP21306;EGP09200;EGP08909;EGP09203;EGP06227;EGP13435	13	novel.1548;EGP16108;EGP20044;EGP20714;EGP24326;EGP30688;EGP28373;EGP00513;novel.700;EGP18867;EGP31050;EGP16106	12
Biological process	GO:0045488	pectin metabolic process	27/1312	0.00208938	27	EGP15975;EGP02033;EGP28160;EGP10096;EGP09617;EGP11471;EGP28574;EGP16225;EGP25999;EGP22915;EGP00235;EGP30962;EGP07298;EGP21392;EGP04541;EGP05701;EGP09616;EGP13071;EGP21950;EGP13890;EGP00234;EGP24851;EGP31455;EGP33662;EGP33659;EGP19523;EGP24557	EGP15975;EGP02033;EGP28160;EGP10096;EGP28574;EGP16225;EGP25999;EGP22915;EGP00235;EGP30962;EGP07298;EGP21392;EGP04541;EGP05701;EGP09616;EGP13071;EGP00234;EGP24851;EGP31455;EGP33662;EGP19523	21	EGP09617;EGP11471;EGP21950;EGP13890;EGP33659;EGP24557	6
Biological process	GO:0016134	saponin metabolic process	6/1312	0.00222823	6	EGP07113;EGP19187;EGP01201;EGP19186;EGP14291;EGP14292	EGP19187;EGP01201;EGP19186;EGP14291;EGP14292	5	EGP07113	1
Biological process	GO:0006694	steroid biosynthetic process	13/1312	0.0022658	13	EGP31512;EGP26007;EGP18943;EGP02677;EGP15709;EGP04887;EGP30737;EGP00513;EGP18867;EGP30785;EGP13435;EGP31128;EGP31050	EGP31512;EGP26007;EGP18943;EGP02677;EGP15709;EGP04887;EGP30737;EGP30785;EGP13435;EGP31128	10	EGP00513;EGP18867;EGP31050	3
Biological process	GO:0016114	terpenoid biosynthetic process	33/1312	0.00231664	33	EGP28582;EGP07168;EGP28298;EGP30586;EGP31207;EGP07113;EGP31370;EGP15977;EGP30711;EGP25484;EGP18960;EGP28165;EGP12504;EGP00885;EGP11294;EGP04887;EGP31416;EGP16069;EGP25951;EGP09921;EGP19751;EGP16620;EGP14245;EGP26966;EGP05822;EGP31178;EGP19885;EGP31078;EGP10724;EGP33822;EGP18890;EGP22548;EGP26512	EGP07168;EGP28298;EGP30586;EGP31207;EGP15977;EGP28165;EGP04887;EGP16069;EGP25951;EGP09921;EGP14245;EGP26966;EGP05822;EGP31178;EGP33822;EGP22548;EGP26512	17	EGP28582;EGP07113;EGP31370;EGP30711;EGP25484;EGP18960;EGP12504;EGP00885;EGP11294;EGP31416;EGP19751;EGP16620;EGP19885;EGP31078;EGP10724;EGP18890	16
Biological process	GO:0009414	response to water deprivation	51/1312	0.00246228	51	EGP26291;EGP11266;EGP05490;EGP07168;EGP27883;EGP05489;EGP10096;EGP00884;EGP31475;EGP32996;EGP14586;EGP31370;EGP09169;EGP21381;EGP26858;EGP08904;EGP18709;EGP00626;EGP12788;EGP28478;EGP26198;EGP05271;EGP29539;EGP23937;EGP26196;EGP20751;EGP16121;EGP10076;EGP28335;EGP20936;EGP04165;EGP30458;EGP13890;EGP13798;EGP02917;EGP04557;EGP05419;EGP13860;EGP18384;EGP10985;EGP19523;EGP19721;EGP27512;EGP17008;EGP…	EGP26291;EGP05490;EGP07168;EGP27883;EGP05489;EGP10096;EGP32996;EGP14586;EGP09169;EGP21381;EGP26858;EGP18709;EGP00626;EGP12788;EGP28478;EGP26198;EGP05271;EGP29539;EGP26196;EGP28335;EGP30458;EGP04557;EGP05419;EGP18384;EGP19523;EGP19721;EGP27512;EGP17008;novel.1155;EGP22548	30	EGP11266;EGP00884;EGP31475;EGP31370;EGP08904;EGP23937;EGP20751;EGP16121;EGP10076;EGP20936;EGP04165;EGP13890;EGP13798;EGP02917;EGP13860;EGP10985;EGP13251;EGP00786;EGP19389;EGP11268;EGP31362	21
Biological process	GO:0046503	glycerolipid catabolic process	5/1312	0.00247899	5	EGP30387;EGP29927;EGP30362;EGP03182;EGP21903	EGP30387;EGP29927;EGP30362;EGP03182;EGP21903	5	--	0
Biological process	GO:0015718	monocarboxylic acid transport	9/1312	0.00252171	9	novel.1932;EGP09449;EGP13201;EGP15134;EGP10470;EGP03376;EGP31721;EGP33363;EGP02151	EGP09449;EGP10470;EGP31721;EGP33363;EGP02151	5	novel.1932;EGP13201;EGP15134;EGP03376	4
Biological process	GO:0009845	seed germination	27/1312	0.0025386	27	EGP26291;EGP05394;EGP32996;EGP12552;EGP30387;EGP19170;EGP11627;EGP15862;EGP18709;EGP29927;EGP10195;novel.2203;EGP09253;EGP25835;EGP20751;EGP16121;EGP10253;EGP30362;EGP21950;EGP31068;EGP13860;EGP17008;EGP04011;EGP21606;EGP06187;EGP21903;EGP26512	EGP26291;EGP05394;EGP32996;EGP12552;EGP30387;EGP11627;EGP18709;EGP29927;EGP10195;EGP25835;EGP10253;EGP30362;EGP31068;EGP17008;EGP21606;EGP06187;EGP21903;EGP26512	18	EGP19170;EGP15862;novel.2203;EGP09253;EGP20751;EGP16121;EGP21950;EGP13860;EGP04011	9
Biological process	GO:0044036	cell wall macromolecule metabolic process	27/1312	0.00288176	27	EGP31337;EGP06071;EGP18419;EGP28160;EGP00919;EGP31225;EGP06299;EGP32972;EGP28574;EGP11409;EGP02234;EGP12766;EGP05448;EGP11314;EGP33477;EGP33483;EGP11626;EGP28487;EGP06555;EGP00220;EGP21950;EGP23619;EGP31455;EGP30841;EGP30844;EGP30839;EGP06204	EGP31337;EGP06071;EGP18419;EGP28160;EGP00919;EGP31225;EGP06299;EGP28574;EGP12766;EGP05448;EGP33477;EGP33483;EGP28487;EGP06555;EGP00220;EGP23619;EGP31455;EGP30841;EGP30844;EGP30839;EGP06204	21	EGP32972;EGP11409;EGP02234;EGP11314;EGP11626;EGP21950	6
Biological process	GO:0010410	hemicellulose metabolic process	19/1312	0.00313909	19	EGP31337;EGP06071;EGP18419;EGP00919;EGP31225;EGP06299;EGP32972;EGP28574;EGP11409;EGP02234;EGP12766;EGP05448;EGP11314;EGP11626;EGP28487;EGP21950;EGP23619;EGP31455;EGP06204	EGP31337;EGP06071;EGP18419;EGP00919;EGP31225;EGP06299;EGP28574;EGP12766;EGP05448;EGP28487;EGP23619;EGP31455;EGP06204	13	EGP32972;EGP11409;EGP02234;EGP11314;EGP11626;EGP21950	6
Biological process	GO:0042542	response to hydrogen peroxide	14/1312	0.00337462	14	EGP13641;EGP09623;EGP16631;EGP09863;EGP05897;EGP26198;EGP30625;EGP26196;EGP31114;EGP10410;EGP11081;EGP31080;EGP21008;EGP18717	EGP09623;EGP16631;EGP09863;EGP05897;EGP26198;EGP26196;EGP31114;EGP10410	8	EGP13641;EGP30625;EGP11081;EGP31080;EGP21008;EGP18717	6
Biological process	GO:0090351	seedling development	30/1312	0.00338511	30	EGP26291;EGP05394;EGP32996;EGP12552;EGP30387;EGP19170;EGP11627;EGP15862;EGP18709;EGP29927;EGP10195;novel.2203;EGP09253;EGP25835;EGP20751;EGP16121;EGP10253;EGP30362;EGP10981;EGP21950;EGP31068;EGP13860;EGP17008;EGP22956;EGP04011;EGP21606;EGP06187;EGP21903;EGP26512;EGP10982	EGP26291;EGP05394;EGP32996;EGP12552;EGP30387;EGP11627;EGP18709;EGP29927;EGP10195;EGP25835;EGP10253;EGP30362;EGP10981;EGP31068;EGP17008;EGP21606;EGP06187;EGP21903;EGP26512	19	EGP19170;EGP15862;novel.2203;EGP09253;EGP20751;EGP16121;EGP21950;EGP13860;EGP22956;EGP04011;EGP10982	11
Biological process	GO:0009698	phenylpropanoid metabolic process	28/1312	0.00345335	28	EGP24622;EGP10904;EGP06277;EGP13932;EGP21398;EGP16631;EGP09863;EGP08904;EGP02432;EGP30989;EGP00076;novel.2017;EGP06849;EGP09831;EGP23937;EGP31351;EGP31114;EGP24248;EGP10888;EGP31025;EGP32252;EGP31350;EGP13251;EGP16583;EGP30701;EGP09347;EGP28552;EGP18016	EGP24622;EGP10904;EGP06277;EGP13932;EGP21398;EGP16631;EGP09863;EGP06849;EGP31351;EGP31114;EGP32252;EGP31350;EGP16583;EGP09347;EGP28552	15	EGP08904;EGP02432;EGP30989;EGP00076;novel.2017;EGP09831;EGP23937;EGP24248;EGP10888;EGP31025;EGP13251;EGP30701;EGP18016	13
Biological process	GO:0008299	isoprenoid biosynthetic process	37/1312	0.00356783	37	EGP28582;EGP07168;EGP28298;EGP30586;EGP31207;EGP07113;EGP31370;EGP08904;EGP15977;EGP30711;EGP25484;EGP18960;EGP28165;EGP12504;EGP23937;EGP00885;EGP11294;EGP04887;EGP31416;EGP16069;EGP25951;EGP09921;EGP19751;EGP16620;EGP14245;EGP26966;EGP05822;EGP31178;EGP19885;EGP00187;EGP31078;EGP10724;EGP33822;EGP18890;EGP22548;EGP26512;EGP30785	EGP07168;EGP28298;EGP30586;EGP31207;EGP15977;EGP28165;EGP04887;EGP16069;EGP25951;EGP09921;EGP14245;EGP26966;EGP05822;EGP31178;EGP33822;EGP22548;EGP26512;EGP30785	18	EGP28582;EGP07113;EGP31370;EGP08904;EGP30711;EGP25484;EGP18960;EGP12504;EGP23937;EGP00885;EGP11294;EGP31416;EGP19751;EGP16620;EGP19885;EGP00187;EGP31078;EGP10724;EGP18890	19
Biological process	GO:0034614	cellular response to reactive oxygen species	8/1312	0.00424004	8	EGP04328;EGP18914;EGP01662;EGP32018;EGP29598;novel.1002;EGP26198;EGP26196	EGP18914;EGP01662;EGP29598;EGP26198;EGP26196	5	EGP04328;EGP32018;novel.1002	3
Biological process	GO:0010876	lipid localization	22/1312	0.00435971	22	EGP05443;EGP02760;EGP22231;EGP30387;EGP29927;EGP09449;EGP34397;EGP30362;EGP13201;EGP05759;EGP06424;EGP15134;EGP13728;EGP10470;EGP03376;EGP14716;EGP09678;EGP13727;EGP02151;EGP21903;EGP19653;EGP22289	EGP30387;EGP29927;EGP09449;EGP34397;EGP30362;EGP13728;EGP10470;EGP14716;EGP09678;EGP13727;EGP02151;EGP21903;EGP19653	13	EGP05443;EGP02760;EGP22231;EGP13201;EGP05759;EGP06424;EGP15134;EGP03376;EGP22289	9
Biological process	GO:2000762	regulation of phenylpropanoid metabolic process	6/1312	0.00463462	6	EGP13932;EGP21398;EGP02432;EGP06849;EGP09831;EGP09347	EGP13932;EGP21398;EGP06849;EGP09347	4	EGP02432;EGP09831	2
Biological process	GO:0015711	organic anion transport	17/1312	0.00492992	17	EGP06737;novel.1932;EGP09449;EGP14277;novel.1630;EGP13540;EGP13201;EGP03045;EGP24154;EGP15134;EGP10470;EGP02446;EGP03376;EGP31721;EGP33363;EGP02151;EGP31781	EGP09449;EGP14277;EGP13540;EGP24154;EGP10470;EGP02446;EGP31721;EGP33363;EGP02151	9	EGP06737;novel.1932;novel.1630;EGP13201;EGP03045;EGP15134;EGP03376;EGP31781	8
Biological process	GO:0044242	cellular lipid catabolic process	16/1312	0.00501826	16	EGP28298;EGP31207;EGP33690;EGP30387;EGP29927;EGP28478;EGP03077;EGP30362;EGP20936;EGP25951;EGP19751;EGP19362;EGP03182;EGP29483;EGP21903;EGP19389	EGP28298;EGP31207;EGP33690;EGP30387;EGP29927;EGP28478;EGP03077;EGP30362;EGP25951;EGP03182;EGP29483;EGP21903	12	EGP20936;EGP19751;EGP19362;EGP19389	4
Biological process	GO:0009641	shade avoidance	7/1312	0.00505364	7	EGP19061;EGP16108;EGP28691;EGP22353;novel.2410;EGP00531;EGP16106	EGP19061;EGP28691;novel.2410;EGP00531	4	EGP16108;EGP22353;EGP16106	3
Biological process	GO:0015849	organic acid transport	21/1312	0.0052658	21	EGP06737;EGP02699;EGP31485;novel.1932;EGP09449;EGP14277;EGP06582;EGP13540;EGP13201;EGP03045;EGP24154;EGP15134;EGP10470;EGP24900;EGP03376;EGP31721;EGP33363;EGP27696;EGP02151;EGP33452;EGP31781	EGP02699;EGP31485;EGP09449;EGP14277;EGP13540;EGP24154;EGP10470;EGP31721;EGP33363;EGP02151	10	EGP06737;novel.1932;EGP06582;EGP13201;EGP03045;EGP15134;EGP24900;EGP03376;EGP27696;EGP33452;EGP31781	11
Biological process	GO:0007568	aging	33/1312	0.00565813	33	EGP26291;EGP27346;EGP02760;EGP12845;EGP09649;EGP04891;EGP00235;EGP16353;EGP11657;EGP11658;EGP03181;novel.2203;EGP05946;EGP21024;EGP21127;EGP29671;EGP16121;EGP31232;EGP20936;EGP30061;EGP00234;EGP16713;EGP00176;EGP30049;EGP13526;EGP11081;EGP00889;EGP30057;EGP21008;EGP18717;EGP09489;EGP19389;EGP00925	EGP26291;EGP12845;EGP09649;EGP00235;EGP16353;EGP03181;EGP21127;EGP29671;EGP31232;EGP30061;EGP00234;EGP16713;EGP30049;EGP13526	14	EGP27346;EGP02760;EGP04891;EGP11657;EGP11658;novel.2203;EGP05946;EGP21024;EGP16121;EGP20936;EGP00176;EGP11081;EGP00889;EGP30057;EGP21008;EGP18717;EGP09489;EGP19389;EGP00925	19
Biological process	GO:0006714	sesquiterpenoid metabolic process	12/1312	0.00575913	12	EGP07168;EGP31370;EGP15977;EGP30711;EGP28478;EGP20936;EGP19751;EGP16620;EGP10724;EGP18890;EGP22548;EGP19389	EGP07168;EGP15977;EGP28478;EGP22548	4	EGP31370;EGP30711;EGP20936;EGP19751;EGP16620;EGP10724;EGP18890;EGP19389	8
Biological process	GO:0016102	diterpenoid biosynthetic process	10/1312	0.00620801	10	EGP28298;EGP31207;EGP18960;EGP11294;EGP04887;EGP25951;EGP09921;EGP26966;EGP19885;EGP26512	EGP28298;EGP31207;EGP04887;EGP25951;EGP09921;EGP26966;EGP26512	7	EGP18960;EGP11294;EGP19885	3
Biological process	GO:0000272	polysaccharide catabolic process	26/1312	0.00631167	26	EGP15975;EGP06071;EGP02033;EGP09617;EGP32972;EGP16225;EGP05448;EGP22915;EGP00235;EGP30962;EGP07298;EGP33477;EGP33483;EGP04541;EGP06995;EGP05701;EGP09616;EGP13071;EGP00234;EGP33662;EGP33659;EGP24061;EGP30841;EGP30844;EGP30839;EGP24557	EGP15975;EGP06071;EGP02033;EGP16225;EGP05448;EGP22915;EGP00235;EGP30962;EGP07298;EGP33477;EGP33483;EGP04541;EGP06995;EGP05701;EGP09616;EGP13071;EGP00234;EGP33662;EGP24061;EGP30841;EGP30844;EGP30839	22	EGP09617;EGP32972;EGP33659;EGP24557	4
Biological process	GO:0009835	fruit ripening	12/1312	0.00639428	12	EGP26291;EGP00235;EGP11657;EGP11658;EGP21024;EGP29671;EGP16121;EGP31232;EGP20936;EGP00234;EGP19389;EGP00925	EGP26291;EGP00235;EGP29671;EGP31232;EGP00234	5	EGP11657;EGP11658;EGP21024;EGP16121;EGP20936;EGP19389;EGP00925	7
Biological process	GO:0008215	spermine metabolic process	4/1312	0.00686856	4	EGP01191;EGP12760;EGP04413;EGP33631	EGP01191;EGP12760;EGP04413	3	EGP33631	1
Biological process	GO:0019430	removal of superoxide radicals	4/1312	0.00686856	4	EGP04328;EGP18914;EGP32018;novel.1002	EGP18914	1	EGP04328;EGP32018;novel.1002	3
Biological process	GO:0046292	formaldehyde metabolic process	4/1312	0.00686856	4	EGP28179;EGP14516;EGP13615;EGP28180	EGP28179;EGP14516;EGP13615	3	EGP28180	1
Biological process	GO:0046294	formaldehyde catabolic process	4/1312	0.00686856	4	EGP28179;EGP14516;EGP13615;EGP28180	EGP28179;EGP14516;EGP13615	3	EGP28180	1
Biological process	GO:0046461	neutral lipid catabolic process	4/1312	0.00686856	4	EGP30387;EGP29927;EGP30362;EGP21903	EGP30387;EGP29927;EGP30362;EGP21903	4	--	0
Biological process	GO:0046464	acylglycerol catabolic process	4/1312	0.00686856	4	EGP30387;EGP29927;EGP30362;EGP21903	EGP30387;EGP29927;EGP30362;EGP21903	4	--	0
Biological process	GO:0071450	cellular response to oxygen radical	4/1312	0.00686856	4	EGP04328;EGP18914;EGP32018;novel.1002	EGP18914	1	EGP04328;EGP32018;novel.1002	3
Biological process	GO:0071451	cellular response to superoxide	4/1312	0.00686856	4	EGP04328;EGP18914;EGP32018;novel.1002	EGP18914	1	EGP04328;EGP32018;novel.1002	3
Biological process	GO:0110095	cellular detoxification of aldehyde	4/1312	0.00686856	4	EGP28179;EGP14516;EGP13615;EGP28180	EGP28179;EGP14516;EGP13615	3	EGP28180	1
Biological process	GO:0009686	gibberellin biosynthetic process	9/1312	0.00705324	9	EGP28298;EGP31207;EGP11294;EGP04887;EGP25951;EGP09921;EGP26966;EGP19885;EGP26512	EGP28298;EGP31207;EGP04887;EGP25951;EGP09921;EGP26966;EGP26512	7	EGP11294;EGP19885	2
Biological process	GO:0016128	phytosteroid metabolic process	7/1312	0.00717093	7	EGP31512;EGP26007;EGP04887;EGP00513;EGP18867;EGP13435;EGP31050	EGP31512;EGP26007;EGP04887;EGP13435	4	EGP00513;EGP18867;EGP31050	3
Biological process	GO:0016131	brassinosteroid metabolic process	7/1312	0.00717093	7	EGP31512;EGP26007;EGP04887;EGP00513;EGP18867;EGP13435;EGP31050	EGP31512;EGP26007;EGP04887;EGP13435	4	EGP00513;EGP18867;EGP31050	3
Biological process	GO:0010383	cell wall polysaccharide metabolic process	22/1312	0.00782563	22	EGP31337;EGP06071;EGP18419;EGP28160;EGP00919;EGP31225;EGP06299;EGP32972;EGP28574;EGP11409;EGP02234;EGP12766;EGP05448;EGP11314;EGP11626;EGP28487;EGP06555;EGP00220;EGP21950;EGP23619;EGP31455;EGP06204	EGP31337;EGP06071;EGP18419;EGP28160;EGP00919;EGP31225;EGP06299;EGP28574;EGP12766;EGP05448;EGP28487;EGP06555;EGP00220;EGP23619;EGP31455;EGP06204	16	EGP32972;EGP11409;EGP02234;EGP11314;EGP11626;EGP21950	6
Biological process	GO:0009685	gibberellin metabolic process	9/1312	0.00802545	9	EGP28298;EGP31207;EGP11294;EGP04887;EGP25951;EGP09921;EGP26966;EGP19885;EGP26512	EGP28298;EGP31207;EGP04887;EGP25951;EGP09921;EGP26966;EGP26512	7	EGP11294;EGP19885	2
Biological process	GO:0044550	secondary metabolite biosynthetic process	27/1312	0.00858945	27	EGP24622;EGP16108;EGP16631;EGP09863;EGP08904;EGP02432;EGP30989;EGP00076;novel.2017;EGP06849;EGP23937;EGP31351;EGP31114;EGP24362;novel.2410;EGP10888;EGP31025;EGP32252;novel.1516;EGP31350;EGP16209;EGP16583;EGP30701;EGP09347;EGP28552;EGP18016;EGP16106	EGP24622;EGP16631;EGP09863;EGP06849;EGP31351;EGP31114;EGP24362;novel.2410;EGP32252;EGP31350;EGP16583;EGP09347;EGP28552	13	EGP16108;EGP08904;EGP02432;EGP30989;EGP00076;novel.2017;EGP23937;EGP10888;EGP31025;novel.1516;EGP16209;EGP30701;EGP18016;EGP16106	14
Biological process	GO:1901659	glycosyl compound biosynthetic process	12/1312	0.00863629	12	EGP07113;EGP16108;EGP28165;EGP23939;EGP19187;novel.2410;EGP04413;EGP19186;novel.1516;EGP16209;EGP31178;EGP16106	EGP28165;EGP23939;EGP19187;novel.2410;EGP04413;EGP19186;EGP31178	7	EGP07113;EGP16108;novel.1516;EGP16209;EGP16106	5
Biological process	GO:0042446	hormone biosynthetic process	16/1312	0.00884014	16	EGP31512;EGP26007;novel.1548;EGP16108;EGP28715;EGP04887;novel.2410;EGP30688;EGP28373;EGP00513;novel.700;EGP06227;EGP18867;EGP13435;EGP31050;EGP16106	EGP31512;EGP26007;EGP28715;EGP04887;novel.2410;EGP06227;EGP13435	7	novel.1548;EGP16108;EGP30688;EGP28373;EGP00513;novel.700;EGP18867;EGP31050;EGP16106	9
Biological process	GO:0046777	protein autophosphorylation	38/1312	0.00885497	38	EGP12188;novel.646;EGP30564;EGP23891;novel.2409;EGP09526;EGP12857;EGP25207;EGP30021;EGP00550;EGP00302;EGP00626;EGP05345;EGP02984;novel.993;EGP18377;EGP10076;EGP21154;EGP31806;EGP05062;EGP03048;EGP18386;EGP15832;EGP15827;EGP22357;EGP15896;EGP33662;EGP00176;EGP00889;EGP06782;EGP31056;EGP06781;EGP21655;EGP30020;novel.469;EGP06187;EGP00603;EGP31362	novel.646;EGP23891;EGP09526;EGP12857;EGP25207;EGP00550;EGP00626;EGP02984;novel.993;EGP18377;EGP21154;EGP31806;EGP05062;EGP03048;EGP15896;EGP33662;EGP31056;EGP21655;EGP30020;novel.469;EGP06187	21	EGP12188;EGP30564;novel.2409;EGP30021;EGP00302;EGP05345;EGP10076;EGP18386;EGP15832;EGP15827;EGP22357;EGP00176;EGP00889;EGP06782;EGP06781;EGP00603;EGP31362	17
Biological process	GO:0000281	mitotic cytokinesis	8/1312	0.00903413	8	EGP10901;EGP23891;EGP27962;EGP16394;EGP01207;EGP20726;EGP23428;EGP28106	EGP23891;EGP27962;EGP01207;EGP20726;EGP23428;EGP28106	6	EGP10901;EGP16394	2
Biological process	GO:0070542	response to fatty acid	28/1312	0.0092717	28	EGP19886;EGP21277;EGP19914;EGP09355;EGP13641;EGP12804;EGP00667;EGP01662;EGP12546;EGP00309;EGP07396;EGP01682;EGP27510;EGP26552;EGP22168;EGP09657;EGP11081;EGP22347;EGP03250;EGP31078;EGP31080;EGP21008;EGP18717;EGP09489;novel.1173;EGP31050;EGP20561;EGP06847	EGP19886;EGP19914;EGP09355;EGP12804;EGP01662;EGP12546;EGP01682;EGP26552;EGP22168;EGP22347;EGP03250	11	EGP21277;EGP13641;EGP00667;EGP00309;EGP07396;EGP27510;EGP09657;EGP11081;EGP31078;EGP31080;EGP21008;EGP18717;EGP09489;novel.1173;EGP31050;EGP20561;EGP06847	17
Biological process	GO:0008272	sulfate transport	4/1312	0.00939156	4	EGP14277;EGP24154;EGP13021;EGP07512	EGP14277;EGP24154;EGP13021	3	EGP07512	1
Biological process	GO:0009813	flavonoid biosynthetic process	17/1312	0.00981061	17	EGP30923;EGP18904;EGP21564;EGP32037;EGP11159;EGP25741;EGP21874;EGP16978;EGP22200;EGP31016;EGP24362;EGP11162;EGP11161;EGP13526;EGP22347;EGP33822;EGP16583	EGP30923;EGP18904;EGP21564;EGP32037;EGP11159;EGP25741;EGP21874;EGP16978;EGP22200;EGP31016;EGP24362;EGP11162;EGP11161;EGP13526;EGP22347;EGP33822;EGP16583	17	--	0
Biological process	GO:0080167	response to karrikin	15/1312	0.0099015	15	EGP07290;EGP00807;novel.1226;novel.997;EGP26660;EGP26198;EGP12983;EGP01102;EGP23939;EGP26196;EGP00017;novel.2235;EGP05419;EGP20781;EGP19689	EGP07290;novel.1226;EGP26198;EGP12983;EGP23939;EGP26196;EGP00017;EGP05419;EGP20781;EGP19689	10	EGP00807;novel.997;EGP26660;EGP01102;novel.2235	5
Biological process	GO:0006833	water transport	6/1312	0.0102717	6	EGP27883;EGP25429;EGP21615;EGP20060;EGP18384;EGP00403	EGP27883;EGP25429;EGP20060;EGP18384	4	EGP21615;EGP00403	2
Biological process	GO:0042044	fluid transport	6/1312	0.0102717	6	EGP27883;EGP25429;EGP21615;EGP20060;EGP18384;EGP00403	EGP27883;EGP25429;EGP20060;EGP18384	4	EGP21615;EGP00403	2
Biological process	GO:1901657	glycosyl compound metabolic process	20/1312	0.0107431	20	EGP28453;EGP07113;EGP16108;EGP21563;EGP07337;EGP04894;EGP28165;EGP23939;EGP19187;EGP01201;novel.2410;EGP04413;EGP19186;novel.1516;EGP29829;EGP16209;EGP31178;EGP14291;EGP14292;EGP16106	EGP21563;EGP07337;EGP04894;EGP28165;EGP23939;EGP19187;EGP01201;novel.2410;EGP04413;EGP19186;EGP29829;EGP31178;EGP14291;EGP14292	14	EGP28453;EGP07113;EGP16108;novel.1516;EGP16209;EGP16106	6
Biological process	GO:0120255	olefinic compound biosynthetic process	16/1312	0.0110628	16	EGP24622;EGP07168;EGP01662;EGP31370;EGP30711;EGP28165;novel.2017;EGP21024;EGP29671;EGP31232;EGP31178;EGP10724;EGP18890;EGP30701;EGP22548;EGP00925	EGP24622;EGP07168;EGP01662;EGP28165;EGP29671;EGP31232;EGP31178;EGP22548	8	EGP31370;EGP30711;novel.2017;EGP21024;EGP10724;EGP18890;EGP30701;EGP00925	8
Biological process	GO:0071215	cellular response to abscisic acid stimulus	41/1312	0.0110964	41	EGP12462;EGP26291;EGP07168;EGP05394;EGP13641;EGP19170;EGP07371;EGP05703;EGP17805;EGP29663;EGP14278;EGP28473;EGP16278;EGP18709;EGP00626;EGP30711;EGP26198;EGP24656;EGP26196;EGP14377;EGP16121;EGP31804;EGP10076;EGP13201;EGP28335;EGP16713;novel.1419;EGP11115;EGP15832;EGP00176;EGP26552;EGP29483;EGP00889;EGP16279;EGP10724;EGP17008;EGP14254;EGP02465;EGP17750;EGP04311;EGP31362	EGP12462;EGP26291;EGP07168;EGP05394;EGP07371;EGP29663;EGP14278;EGP28473;EGP16278;EGP18709;EGP00626;EGP26198;EGP24656;EGP26196;EGP28335;EGP16713;EGP26552;EGP29483;EGP16279;EGP17008;EGP04311	21	EGP13641;EGP19170;EGP05703;EGP17805;EGP30711;EGP14377;EGP16121;EGP31804;EGP10076;EGP13201;novel.1419;EGP11115;EGP15832;EGP00176;EGP00889;EGP10724;EGP14254;EGP02465;EGP17750;EGP31362	20
Biological process	GO:0097306	cellular response to alcohol	41/1312	0.0110964	41	EGP12462;EGP26291;EGP07168;EGP05394;EGP13641;EGP19170;EGP07371;EGP05703;EGP17805;EGP29663;EGP14278;EGP28473;EGP16278;EGP18709;EGP00626;EGP30711;EGP26198;EGP24656;EGP26196;EGP14377;EGP16121;EGP31804;EGP10076;EGP13201;EGP28335;EGP16713;novel.1419;EGP11115;EGP15832;EGP00176;EGP26552;EGP29483;EGP00889;EGP16279;EGP10724;EGP17008;EGP14254;EGP02465;EGP17750;EGP04311;EGP31362	EGP12462;EGP26291;EGP07168;EGP05394;EGP07371;EGP29663;EGP14278;EGP28473;EGP16278;EGP18709;EGP00626;EGP26198;EGP24656;EGP26196;EGP28335;EGP16713;EGP26552;EGP29483;EGP16279;EGP17008;EGP04311	21	EGP13641;EGP19170;EGP05703;EGP17805;EGP30711;EGP14377;EGP16121;EGP31804;EGP10076;EGP13201;novel.1419;EGP11115;EGP15832;EGP00176;EGP00889;EGP10724;EGP14254;EGP02465;EGP17750;EGP31362	20
Biological process	GO:0009808	lignin metabolic process	14/1312	0.0119903	14	EGP16631;EGP09863;EGP02432;EGP30989;EGP06849;EGP31351;EGP31114;EGP24248;EGP10888;EGP31025;EGP31350;EGP13251;EGP09347;EGP18016	EGP16631;EGP09863;EGP06849;EGP31351;EGP31114;EGP31350;EGP09347	7	EGP02432;EGP30989;EGP24248;EGP10888;EGP31025;EGP13251;EGP18016	7
Biological process	GO:0010187	negative regulation of seed germination	6/1312	0.01222	6	EGP30387;EGP15862;EGP29927;EGP30362;EGP13860;EGP21903	EGP30387;EGP29927;EGP30362;EGP21903	4	EGP15862;EGP13860	2
Biological process	GO:0006869	lipid transport	18/1312	0.0130213	18	EGP05443;EGP02760;EGP22231;EGP09449;EGP34397;EGP13201;EGP05759;EGP06424;EGP15134;EGP13728;EGP10470;EGP03376;EGP14716;EGP09678;EGP13727;EGP02151;EGP19653;EGP22289	EGP09449;EGP34397;EGP13728;EGP10470;EGP14716;EGP09678;EGP13727;EGP02151;EGP19653	9	EGP05443;EGP02760;EGP22231;EGP13201;EGP05759;EGP06424;EGP15134;EGP03376;EGP22289	9
Biological process	GO:0009873	ethylene-activated signaling pathway	29/1312	0.0132019	29	EGP08843;EGP13468;EGP16692;EGP01384;EGP09355;EGP07371;EGP18706;EGP00686;EGP24213;EGP16610;EGP28434;EGP14769;EGP00626;EGP12536;EGP15937;EGP16353;EGP00722;EGP05005;EGP18881;EGP32320;EGP13860;EGP30421;EGP27510;EGP14515;EGP08799;EGP13955;EGP11523;EGP31379;EGP06893	EGP13468;EGP16692;EGP09355;EGP07371;EGP18706;EGP16610;EGP28434;EGP14769;EGP00626;EGP12536;EGP15937;EGP16353;EGP00722;EGP32320;EGP08799;EGP06893	16	EGP08843;EGP01384;EGP00686;EGP24213;EGP05005;EGP18881;EGP13860;EGP30421;EGP27510;EGP14515;EGP13955;EGP11523;EGP31379	13
Biological process	GO:0002213	defense response to insect	7/1312	0.0132724	7	EGP25999;EGP04515;EGP12959;EGP29901;EGP20781;EGP31080;EGP18457	EGP25999;EGP12959;EGP29901;EGP20781;EGP18457	5	EGP04515;EGP31080	2
Biological process	GO:0010218	response to far red light	7/1312	0.0132724	7	EGP19061;EGP13537;EGP21891;EGP21908;EGP20185;EGP31080;EGP09666	EGP19061;EGP13537;EGP21891;EGP21908	4	EGP20185;EGP31080;EGP09666	3
Biological process	GO:2000022	regulation of jasmonic acid mediated signaling pathway	8/1312	0.0133869	8	EGP26552;EGP09657;EGP11081;EGP22347;EGP21008;EGP18717;EGP20561;EGP06847	EGP26552;EGP22347	2	EGP09657;EGP11081;EGP21008;EGP18717;EGP20561;EGP06847	6
Biological process	GO:0016101	diterpenoid metabolic process	10/1312	0.0135669	10	EGP28298;EGP31207;EGP18960;EGP11294;EGP04887;EGP25951;EGP09921;EGP26966;EGP19885;EGP26512	EGP28298;EGP31207;EGP04887;EGP25951;EGP09921;EGP26966;EGP26512	7	EGP18960;EGP11294;EGP19885	3
Biological process	GO:0009809	lignin biosynthetic process	12/1312	0.0136827	12	EGP16631;EGP09863;EGP02432;EGP30989;EGP06849;EGP31351;EGP31114;EGP10888;EGP31025;EGP31350;EGP09347;EGP18016	EGP16631;EGP09863;EGP06849;EGP31351;EGP31114;EGP31350;EGP09347	7	EGP02432;EGP30989;EGP10888;EGP31025;EGP18016	5
Biological process	GO:0009753	response to jasmonic acid	27/1312	0.0155785	27	EGP19886;EGP21277;EGP19914;EGP09355;EGP13641;EGP12804;EGP00667;EGP12546;EGP00309;EGP07396;EGP01682;EGP27510;EGP26552;EGP22168;EGP09657;EGP11081;EGP22347;EGP03250;EGP31078;EGP31080;EGP21008;EGP18717;EGP09489;novel.1173;EGP31050;EGP20561;EGP06847	EGP19886;EGP19914;EGP09355;EGP12804;EGP12546;EGP01682;EGP26552;EGP22168;EGP22347;EGP03250	10	EGP21277;EGP13641;EGP00667;EGP00309;EGP07396;EGP27510;EGP09657;EGP11081;EGP31078;EGP31080;EGP21008;EGP18717;EGP09489;novel.1173;EGP31050;EGP20561;EGP06847	17
Biological process	GO:0000303	response to superoxide	4/1312	0.0160732	4	EGP04328;EGP18914;EGP32018;novel.1002	EGP18914	1	EGP04328;EGP32018;novel.1002	3
Biological process	GO:0110096	cellular response to aldehyde	4/1312	0.0160732	4	EGP28179;EGP14516;EGP13615;EGP28180	EGP28179;EGP14516;EGP13615	3	EGP28180	1
Biological process	GO:0071369	cellular response to ethylene stimulus	29/1312	0.0165442	29	EGP08843;EGP13468;EGP16692;EGP01384;EGP09355;EGP07371;EGP18706;EGP00686;EGP24213;EGP16610;EGP28434;EGP14769;EGP00626;EGP12536;EGP15937;EGP16353;EGP00722;EGP05005;EGP18881;EGP32320;EGP13860;EGP30421;EGP27510;EGP14515;EGP08799;EGP13955;EGP11523;EGP31379;EGP06893	EGP13468;EGP16692;EGP09355;EGP07371;EGP18706;EGP16610;EGP28434;EGP14769;EGP00626;EGP12536;EGP15937;EGP16353;EGP00722;EGP32320;EGP08799;EGP06893	16	EGP08843;EGP01384;EGP00686;EGP24213;EGP05005;EGP18881;EGP13860;EGP30421;EGP27510;EGP14515;EGP13955;EGP11523;EGP31379	13
Biological process	GO:0019747	regulation of isoprenoid metabolic process	10/1312	0.0165454	10	EGP07168;EGP28298;EGP31207;EGP30711;EGP25951;EGP09921;EGP19885;EGP10724;EGP22548;EGP26512	EGP07168;EGP28298;EGP31207;EGP25951;EGP09921;EGP22548;EGP26512	7	EGP30711;EGP19885;EGP10724	3
Biological process	GO:0006835	dicarboxylic acid transport	6/1312	0.0168676	6	EGP06737;EGP09449;EGP14277;EGP13540;EGP24154;EGP15134	EGP09449;EGP14277;EGP13540;EGP24154	4	EGP06737;EGP15134	2
Biological process	GO:0072348	sulfur compound transport	6/1312	0.0168676	6	EGP14277;novel.1630;EGP24154;EGP13021;EGP07512;EGP31781	EGP14277;EGP24154;EGP13021	3	novel.1630;EGP07512;EGP31781	3
Biological process	GO:1901698	response to nitrogen compound	36/1312	0.0182335	36	EGP27346;EGP28453;EGP14051;EGP13641;EGP12804;EGP26023;EGP10536;EGP30794;EGP28524;EGP09526;EGP01662;EGP09622;EGP04891;EGP14586;EGP18706;EGP23451;EGP08904;EGP24269;EGP00722;EGP02631;EGP14053;EGP21127;EGP23937;EGP20751;EGP15686;EGP21830;EGP18485;EGP21716;EGP11081;EGP31080;EGP21008;EGP02943;novel.857;EGP00786;EGP18717;EGP24329	EGP12804;EGP26023;EGP10536;EGP30794;EGP09526;EGP01662;EGP09622;EGP14586;EGP18706;EGP23451;EGP00722;EGP14053;EGP21127;EGP21830;EGP18485;EGP21716;EGP02943;novel.857;EGP24329	19	EGP27346;EGP28453;EGP14051;EGP13641;EGP28524;EGP04891;EGP08904;EGP24269;EGP02631;EGP23937;EGP20751;EGP15686;EGP11081;EGP31080;EGP21008;EGP00786;EGP18717	17
Biological process	GO:0034754	cellular hormone metabolic process	13/1312	0.018392	13	novel.1548;EGP16108;EGP28715;EGP20044;EGP24326;novel.2410;EGP21306;EGP09200;EGP08909;EGP28373;EGP09203;EGP06227;EGP16106	EGP28715;novel.2410;EGP21306;EGP09200;EGP08909;EGP09203;EGP06227	7	novel.1548;EGP16108;EGP20044;EGP24326;EGP28373;EGP16106	6
Biological process	GO:0072330	monocarboxylic acid biosynthetic process	36/1312	0.0189302	36	EGP24622;EGP12462;EGP25884;EGP07168;EGP30521;EGP16137;EGP10406;EGP09644;EGP16108;EGP33690;EGP31370;EGP26804;EGP30711;novel.2017;EGP12316;EGP01212;EGP05633;EGP25937;EGP26805;EGP20723;novel.2410;EGP24324;EGP08435;EGP13860;EGP25668;EGP10724;EGP31080;EGP26802;EGP33757;EGP28561;EGP18890;EGP30701;EGP22548;EGP20291;EGP19689;EGP16106	EGP24622;EGP12462;EGP25884;EGP07168;EGP16137;EGP10406;EGP33690;EGP26804;EGP05633;EGP25937;EGP26805;EGP20723;novel.2410;EGP08435;EGP25668;EGP26802;EGP22548;EGP19689	18	EGP30521;EGP09644;EGP16108;EGP31370;EGP30711;novel.2017;EGP12316;EGP01212;EGP24324;EGP13860;EGP10724;EGP31080;EGP33757;EGP28561;EGP18890;EGP30701;EGP20291;EGP16106	18
Biological process	GO:0009694	jasmonic acid metabolic process	8/1312	0.0191011	8	EGP21277;EGP33690;EGP12316;EGP22133;EGP22168;EGP10654;EGP31080;EGP28561	EGP33690;EGP22133;EGP22168	3	EGP21277;EGP12316;EGP10654;EGP31080;EGP28561	5
Biological process	GO:0009833	plant-type primary cell wall biogenesis	6/1312	0.0195939	6	EGP10901;EGP27962;EGP16394;EGP01207;EGP23428;EGP28106	EGP27962;EGP01207;EGP23428;EGP28106	4	EGP10901;EGP16394	2
Biological process	GO:0016098	monoterpenoid metabolic process	6/1312	0.0195939	6	EGP28165;EGP12504;EGP31416;EGP16069;EGP14245;EGP31178	EGP28165;EGP16069;EGP14245;EGP31178	4	EGP12504;EGP31416	2
Biological process	GO:0016099	monoterpenoid biosynthetic process	6/1312	0.0195939	6	EGP28165;EGP12504;EGP31416;EGP16069;EGP14245;EGP31178	EGP28165;EGP16069;EGP14245;EGP31178	4	EGP12504;EGP31416	2
Biological process	GO:0015698	inorganic anion transport	18/1312	0.0200408	18	EGP27346;EGP09730;EGP00884;EGP29902;EGP30794;EGP04891;EGP16352;EGP12788;EGP16353;EGP14277;EGP21127;EGP22509;EGP24154;EGP13021;EGP33166;EGP07512;novel.1702;EGP03306	EGP09730;EGP29902;EGP30794;EGP16352;EGP12788;EGP16353;EGP14277;EGP21127;EGP22509;EGP24154;EGP13021;EGP33166;novel.1702	13	EGP27346;EGP00884;EGP04891;EGP07512;EGP03306	5
Biological process	GO:0006801	superoxide metabolic process	4/1312	0.0202959	4	EGP04328;EGP18914;EGP32018;novel.1002	EGP18914	1	EGP04328;EGP32018;novel.1002	3
Biological process	GO:0006821	chloride transport	4/1312	0.0202959	4	EGP09730;EGP00884;EGP29902;EGP12788	EGP09730;EGP29902;EGP12788	3	EGP00884	1
Biological process	GO:0048830	adventitious root development	4/1312	0.0202959	4	EGP16108;novel.2410;EGP03477;EGP16106	novel.2410	1	EGP16108;EGP03477;EGP16106	3
Biological process	GO:0009699	phenylpropanoid biosynthetic process	21/1312	0.0209232	21	EGP24622;EGP16631;EGP09863;EGP08904;EGP02432;EGP30989;EGP00076;novel.2017;EGP06849;EGP23937;EGP31351;EGP31114;EGP10888;EGP31025;EGP32252;EGP31350;EGP16583;EGP30701;EGP09347;EGP28552;EGP18016	EGP24622;EGP16631;EGP09863;EGP06849;EGP31351;EGP31114;EGP32252;EGP31350;EGP16583;EGP09347;EGP28552	11	EGP08904;EGP02432;EGP30989;EGP00076;novel.2017;EGP23937;EGP10888;EGP31025;EGP30701;EGP18016	10
Biological process	GO:0010268	brassinosteroid homeostasis	5/1312	0.021038	5	EGP31512;EGP04887;EGP00513;EGP18867;EGP31050	EGP31512;EGP04887	2	EGP00513;EGP18867;EGP31050	3
Biological process	GO:0009812	flavonoid metabolic process	18/1312	0.021244	18	EGP30923;EGP18904;EGP21564;EGP32037;EGP11159;EGP25741;EGP21874;EGP16978;EGP22200;EGP31016;EGP24362;EGP11162;EGP11161;EGP13526;EGP22347;EGP33822;EGP16583;EGP22169	EGP30923;EGP18904;EGP21564;EGP32037;EGP11159;EGP25741;EGP21874;EGP16978;EGP22200;EGP31016;EGP24362;EGP11162;EGP11161;EGP13526;EGP22347;EGP33822;EGP16583;EGP22169	18	--	0
Biological process	GO:0000160	phosphorelay signal transduction system	32/1312	0.0219804	32	EGP08843;EGP13468;EGP16692;EGP01384;EGP09355;EGP07371;EGP18706;EGP00686;EGP24213;EGP16610;EGP28434;EGP14769;EGP00626;EGP12536;EGP30078;EGP15937;EGP16353;EGP00722;EGP05005;EGP18881;EGP26526;EGP32320;EGP14289;EGP13860;EGP30421;EGP27510;EGP14515;EGP08799;EGP13955;EGP11523;EGP31379;EGP06893	EGP13468;EGP16692;EGP09355;EGP07371;EGP18706;EGP16610;EGP28434;EGP14769;EGP00626;EGP12536;EGP15937;EGP16353;EGP00722;EGP32320;EGP14289;EGP08799;EGP06893	17	EGP08843;EGP01384;EGP00686;EGP24213;EGP30078;EGP05005;EGP18881;EGP26526;EGP13860;EGP30421;EGP27510;EGP14515;EGP13955;EGP11523;EGP31379	15
Biological process	GO:0000302	response to reactive oxygen species	25/1312	0.0221677	25	EGP04328;EGP18914;EGP13641;EGP01662;EGP09623;EGP16631;EGP32018;EGP09863;EGP29598;EGP05897;novel.1002;EGP26198;EGP02984;EGP30625;EGP26196;EGP31114;EGP10076;EGP10410;EGP22443;EGP21542;EGP11081;EGP31080;EGP21008;EGP18717;EGP31362	EGP18914;EGP01662;EGP09623;EGP16631;EGP09863;EGP29598;EGP05897;EGP26198;EGP02984;EGP26196;EGP31114;EGP10410;EGP21542	13	EGP04328;EGP13641;EGP32018;novel.1002;EGP30625;EGP10076;EGP22443;EGP11081;EGP31080;EGP21008;EGP18717;EGP31362	12
Biological process	GO:0071669	plant-type cell wall organization or biogenesis	36/1312	0.0227388	36	EGP31337;EGP27894;EGP10901;EGP28160;EGP06299;EGP10096;EGP22028;EGP27962;EGP08658;EGP25999;EGP14030;EGP05097;EGP15681;EGP21392;EGP16394;EGP06849;EGP06773;EGP28758;EGP11626;EGP28487;EGP04116;EGP06555;EGP00220;EGP01207;EGP10319;EGP20060;EGP21950;EGP13890;EGP18474;EGP23428;EGP18341;EGP19523;EGP28106;EGP21647;EGP09347;EGP18016	EGP31337;EGP27894;EGP28160;EGP06299;EGP10096;EGP22028;EGP27962;EGP08658;EGP25999;EGP14030;EGP05097;EGP15681;EGP21392;EGP06849;EGP06773;EGP28758;EGP28487;EGP06555;EGP00220;EGP01207;EGP10319;EGP20060;EGP23428;EGP19523;EGP28106;EGP21647;EGP09347	27	EGP10901;EGP16394;EGP11626;EGP04116;EGP21950;EGP13890;EGP18474;EGP18341;EGP18016	9
Biological process	GO:0009308	amine metabolic process	19/1312	0.0232757	19	EGP01191;novel.1548;EGP16108;EGP28715;novel.2254;EGP20044;EGP12760;EGP24326;novel.2410;EGP04413;EGP21306;EGP09200;EGP08909;EGP28373;EGP09203;EGP33631;EGP27512;EGP06227;EGP16106	EGP01191;EGP28715;novel.2254;EGP12760;novel.2410;EGP04413;EGP21306;EGP09200;EGP08909;EGP09203;EGP27512;EGP06227	12	novel.1548;EGP16108;EGP20044;EGP24326;EGP28373;EGP33631;EGP16106	7
Biological process	GO:0009734	auxin-activated signaling pathway	34/1312	0.0232854	34	EGP16692;EGP31283;EGP28453;EGP13641;EGP04614;EGP28524;EGP10512;EGP30939;EGP15937;EGP06545;EGP00488;EGP13537;EGP16488;novel.2203;EGP06582;EGP21727;EGP06529;EGP10981;EGP31950;EGP10181;EGP30796;EGP28710;EGP14445;EGP18113;EGP30688;EGP33734;EGP31080;EGP14515;EGP33452;novel.700;EGP18890;EGP09666;EGP10982;EGP29427	EGP16692;EGP31283;EGP04614;EGP10512;EGP30939;EGP15937;EGP13537;EGP16488;EGP21727;EGP10981;EGP31950;EGP10181;EGP28710;EGP18113;EGP33734	15	EGP28453;EGP13641;EGP28524;EGP06545;EGP00488;novel.2203;EGP06582;EGP06529;EGP30796;EGP14445;EGP30688;EGP31080;EGP14515;EGP33452;novel.700;EGP18890;EGP09666;EGP10982;EGP29427	19
Biological process	GO:0016032	viral process	13/1312	0.0246767	13	EGP16102;EGP19307;EGP16100;EGP25447;EGP04330;EGP02699;EGP08962;EGP06836;EGP16285;EGP03181;EGP19302;EGP27880;EGP09489	EGP19307;EGP16100;EGP04330;EGP02699;EGP08962;EGP06836;EGP16285;EGP03181;EGP19302;EGP27880	10	EGP16102;EGP25447;EGP09489	3
Biological process	GO:0016138	glycoside biosynthetic process	5/1312	0.0248596	5	EGP07113;EGP28165;EGP19187;EGP19186;EGP31178	EGP28165;EGP19187;EGP19186;EGP31178	4	EGP07113	1
Biological process	GO:0010243	response to organonitrogen compound	31/1312	0.0248942	31	EGP28453;EGP14051;EGP12804;EGP26023;EGP10536;EGP30794;EGP28524;EGP09526;EGP09622;EGP14586;EGP18706;EGP23451;EGP08904;EGP24269;EGP00722;EGP02631;EGP14053;EGP23937;EGP20751;EGP15686;EGP21830;EGP18485;EGP21716;EGP11081;EGP31080;EGP21008;EGP02943;novel.857;EGP00786;EGP18717;EGP24329	EGP12804;EGP26023;EGP10536;EGP30794;EGP09526;EGP09622;EGP14586;EGP18706;EGP23451;EGP00722;EGP14053;EGP21830;EGP18485;EGP21716;EGP02943;novel.857;EGP24329	17	EGP28453;EGP14051;EGP28524;EGP08904;EGP24269;EGP02631;EGP23937;EGP20751;EGP15686;EGP11081;EGP31080;EGP21008;EGP00786;EGP18717	14
Biological process	GO:2000038	regulation of stomatal complex development	4/1312	0.0251391	4	EGP00176;EGP00889;novel.2165;novel.460	novel.2165;novel.460	2	EGP00176;EGP00889	2
Biological process	GO:0023051	regulation of signaling	42/1312	0.0253012	42	EGP26291;EGP07168;EGP28453;EGP28230;EGP05394;EGP04614;EGP13932;EGP28524;EGP07371;EGP22202;EGP21398;EGP05703;EGP29663;EGP14278;EGP00854;EGP00626;EGP09831;EGP02938;EGP00669;EGP14377;EGP16121;EGP31804;EGP10181;EGP15832;EGP31068;EGP00176;EGP26552;EGP32309;EGP09657;EGP29483;EGP11081;EGP00889;EGP32311;EGP22347;EGP21008;EGP14515;EGP18717;EGP14254;EGP02465;EGP17750;EGP20561;EGP06847	EGP26291;EGP07168;EGP28230;EGP05394;EGP04614;EGP13932;EGP07371;EGP22202;EGP21398;EGP29663;EGP14278;EGP00854;EGP00626;EGP02938;EGP00669;EGP10181;EGP31068;EGP26552;EGP32309;EGP29483;EGP22347	21	EGP28453;EGP28524;EGP05703;EGP09831;EGP14377;EGP16121;EGP31804;EGP15832;EGP00176;EGP09657;EGP11081;EGP00889;EGP32311;EGP21008;EGP14515;EGP18717;EGP14254;EGP02465;EGP17750;EGP20561;EGP06847	21
Biological process	GO:0009738	abscisic acid-activated signaling pathway	37/1312	0.0258081	37	EGP26291;EGP07168;EGP05394;EGP13641;EGP19170;EGP07371;EGP05703;EGP17805;EGP29663;EGP14278;EGP28473;EGP16278;EGP18709;EGP00626;EGP30711;EGP24656;EGP14377;EGP16121;EGP31804;EGP10076;EGP13201;EGP28335;novel.1419;EGP11115;EGP15832;EGP00176;EGP26552;EGP29483;EGP00889;EGP16279;EGP10724;EGP17008;EGP14254;EGP02465;EGP17750;EGP04311;EGP31362	EGP26291;EGP07168;EGP05394;EGP07371;EGP29663;EGP14278;EGP28473;EGP16278;EGP18709;EGP00626;EGP24656;EGP28335;EGP26552;EGP29483;EGP16279;EGP17008;EGP04311	17	EGP13641;EGP19170;EGP05703;EGP17805;EGP30711;EGP14377;EGP16121;EGP31804;EGP10076;EGP13201;novel.1419;EGP11115;EGP15832;EGP00176;EGP00889;EGP10724;EGP14254;EGP02465;EGP17750;EGP31362	20
Biological process	GO:0006825	copper ion transport	3/1312	0.0265054	3	EGP07130;EGP14970;EGP15718	EGP07130;EGP14970;EGP15718	3	--	0
Biological process	GO:0043473	pigmentation	3/1312	0.0265054	3	EGP05097;EGP13537;EGP09666	EGP05097;EGP13537	2	EGP09666	1
Biological process	GO:0016998	cell wall macromolecule catabolic process	9/1312	0.0265289	9	EGP06071;EGP18419;EGP32972;EGP05448;EGP33477;EGP33483;EGP30841;EGP30844;EGP30839	EGP06071;EGP18419;EGP05448;EGP33477;EGP33483;EGP30841;EGP30844;EGP30839	8	EGP32972	1
Biological process	GO:0009636	response to toxic substance	14/1312	0.026582	14	EGP04328;EGP30699;EGP28179;EGP26892;EGP18914;EGP14516;EGP32018;EGP18102;novel.1002;EGP26887;EGP13615;EGP28180;EGP10930;EGP10931	EGP30699;EGP28179;EGP18914;EGP14516;EGP18102;EGP26887;EGP13615	7	EGP04328;EGP26892;EGP32018;novel.1002;EGP28180;EGP10930;EGP10931	7
Biological process	GO:0010646	regulation of cell communication	42/1312	0.0278221	42	EGP26291;EGP07168;EGP28453;EGP28230;EGP05394;EGP04614;EGP13932;EGP28524;EGP07371;EGP22202;EGP21398;EGP05703;EGP29663;EGP14278;EGP00854;EGP00626;EGP09831;EGP02938;EGP00669;EGP14377;EGP16121;EGP31804;EGP10181;EGP15832;EGP31068;EGP00176;EGP26552;EGP32309;EGP09657;EGP29483;EGP11081;EGP00889;EGP32311;EGP22347;EGP21008;EGP14515;EGP18717;EGP14254;EGP02465;EGP17750;EGP20561;EGP06847	EGP26291;EGP07168;EGP28230;EGP05394;EGP04614;EGP13932;EGP07371;EGP22202;EGP21398;EGP29663;EGP14278;EGP00854;EGP00626;EGP02938;EGP00669;EGP10181;EGP31068;EGP26552;EGP32309;EGP29483;EGP22347	21	EGP28453;EGP28524;EGP05703;EGP09831;EGP14377;EGP16121;EGP31804;EGP15832;EGP00176;EGP09657;EGP11081;EGP00889;EGP32311;EGP21008;EGP14515;EGP18717;EGP14254;EGP02465;EGP17750;EGP20561;EGP06847	21
Biological process	GO:1900424	regulation of defense response to bacterium	15/1312	0.0281542	15	novel.646;EGP10406;EGP22202;EGP12857;EGP00626;novel.775;novel.993;EGP07261;EGP32309;EGP32367;EGP32311;novel.2165;novel.469;novel.460;EGP16389	novel.646;EGP10406;EGP22202;EGP12857;EGP00626;novel.775;novel.993;EGP07261;EGP32309;novel.2165;novel.469;novel.460;EGP16389	13	EGP32367;EGP32311	2
Biological process	GO:1901071	glucosamine-containing compound metabolic process	7/1312	0.0283147	7	EGP12073;EGP33477;EGP33483;EGP24061;EGP30841;EGP30844;EGP30839	EGP33477;EGP33483;EGP24061;EGP30841;EGP30844;EGP30839	6	EGP12073	1
Biological process	GO:0044282	small molecule catabolic process	26/1312	0.0288919	26	EGP24622;EGP28298;EGP28179;EGP31207;EGP31475;EGP14516;EGP33690;EGP19170;EGP00684;EGP21563;EGP07193;EGP07192;EGP02960;EGP28478;novel.2017;EGP08711;EGP20936;EGP25951;EGP13615;EGP28180;EGP09532;EGP13526;EGP18457;EGP21129;EGP19389;EGP12460	EGP24622;EGP28298;EGP28179;EGP31207;EGP14516;EGP33690;EGP00684;EGP21563;EGP07193;EGP07192;EGP02960;EGP28478;EGP08711;EGP25951;EGP13615;EGP09532;EGP13526;EGP18457;EGP21129	19	EGP31475;EGP19170;novel.2017;EGP20936;EGP28180;EGP19389;EGP12460	7
Biological process	GO:0006863	purine nucleobase transport	5/1312	0.0290993	5	EGP25924;novel.573;EGP25925;EGP30776;EGP02387	novel.573;EGP30776	2	EGP25924;EGP25925;EGP02387	3
Biological process	GO:0009832	plant-type cell wall biogenesis	22/1312	0.0299737	22	EGP31337;EGP10901;EGP28160;EGP06299;EGP27962;EGP08658;EGP14030;EGP16394;EGP06849;EGP28487;EGP04116;EGP06555;EGP00220;EGP01207;EGP10319;EGP18474;EGP23428;EGP18341;EGP28106;EGP21647;EGP09347;EGP18016	EGP31337;EGP28160;EGP06299;EGP27962;EGP08658;EGP14030;EGP06849;EGP28487;EGP06555;EGP00220;EGP01207;EGP10319;EGP23428;EGP28106;EGP21647;EGP09347	16	EGP10901;EGP16394;EGP04116;EGP18474;EGP18341;EGP18016	6
Biological process	GO:0071365	cellular response to auxin stimulus	35/1312	0.0305602	35	EGP16692;EGP31283;EGP28453;EGP19183;EGP13641;EGP04614;EGP28524;EGP10512;EGP30939;EGP15937;EGP06545;EGP00488;EGP13537;EGP16488;novel.2203;EGP06582;EGP21727;EGP06529;EGP10981;EGP31950;EGP10181;EGP30796;EGP28710;EGP14445;EGP18113;EGP30688;EGP33734;EGP31080;EGP14515;EGP33452;novel.700;EGP18890;EGP09666;EGP10982;EGP29427	EGP16692;EGP31283;EGP19183;EGP04614;EGP10512;EGP30939;EGP15937;EGP13537;EGP16488;EGP21727;EGP10981;EGP31950;EGP10181;EGP28710;EGP18113;EGP33734	16	EGP28453;EGP13641;EGP28524;EGP06545;EGP00488;novel.2203;EGP06582;EGP06529;EGP30796;EGP14445;EGP30688;EGP31080;EGP14515;EGP33452;novel.700;EGP18890;EGP09666;EGP10982;EGP29427	19
Biological process	GO:0000305	response to oxygen radical	4/1312	0.0306194	4	EGP04328;EGP18914;EGP32018;novel.1002	EGP18914	1	EGP04328;EGP32018;novel.1002	3
Biological process	GO:0015908	fatty acid transport	4/1312	0.0306194	4	EGP09449;EGP15134;EGP03376;EGP02151	EGP09449;EGP02151	2	EGP15134;EGP03376	2
Biological process	GO:0046164	alcohol catabolic process	7/1312	0.0316247	7	EGP19170;EGP07193;EGP07192;EGP28478;EGP20936;EGP19389;EGP12460	EGP07193;EGP07192;EGP28478	3	EGP19170;EGP20936;EGP19389;EGP12460	4
Biological process	GO:0061640	cytoskeleton-dependent cytokinesis	8/1312	0.0321695	8	EGP10901;EGP23891;EGP27962;EGP16394;EGP01207;EGP20726;EGP23428;EGP28106	EGP23891;EGP27962;EGP01207;EGP20726;EGP23428;EGP28106	6	EGP10901;EGP16394	2
Biological process	GO:0071446	cellular response to salicylic acid stimulus	13/1312	0.0324196	13	EGP26720;EGP30564;EGP00667;EGP22202;EGP00626;EGP02938;EGP06424;EGP12678;EGP14716;EGP26552;EGP32309;EGP32311;EGP09678	EGP26720;EGP22202;EGP00626;EGP02938;EGP12678;EGP14716;EGP26552;EGP32309;EGP09678	9	EGP30564;EGP00667;EGP06424;EGP32311	4
Biological process	GO:0009751	response to salicylic acid	26/1312	0.0327092	26	EGP07168;EGP26720;EGP13641;EGP12804;EGP30564;EGP00667;EGP22202;EGP00626;EGP02938;EGP06424;EGP01682;EGP18158;EGP12678;EGP27510;EGP14716;EGP26552;EGP32309;EGP13526;EGP11081;EGP32311;EGP31078;EGP09678;EGP31080;EGP21008;EGP18717;EGP09489	EGP07168;EGP26720;EGP12804;EGP22202;EGP00626;EGP02938;EGP01682;EGP12678;EGP14716;EGP26552;EGP32309;EGP13526;EGP09678	13	EGP13641;EGP30564;EGP00667;EGP06424;EGP18158;EGP27510;EGP11081;EGP32311;EGP31078;EGP31080;EGP21008;EGP18717;EGP09489	13
Biological process	GO:0009875	pollen-pistil interaction	16/1312	0.0330037	16	EGP30567;EGP12758;EGP28230;EGP28975;EGP11761;EGP30564;EGP23948;EGP12757;EGP00805;EGP02219;EGP02214;EGP30496;EGP02218;EGP28340;EGP30495;EGP30497	EGP12758;EGP28230;EGP12757;EGP00805;EGP02219;EGP30496;EGP02218;EGP28340;EGP30495;EGP30497	10	EGP30567;EGP28975;EGP11761;EGP30564;EGP23948;EGP02214	6
Biological process	GO:0010540	basipetal auxin transport	5/1312	0.0337686	5	EGP10512;EGP13537;EGP05419;EGP14515;EGP09666	EGP10512;EGP13537;EGP05419	3	EGP14515;EGP09666	2
Biological process	GO:0002237	response to molecule of bacterial origin	11/1312	0.0342863	11	EGP26720;EGP22202;EGP32116;EGP29761;EGP05062;EGP18386;EGP12678;EGP22357;EGP26278;EGP32367;EGP21655	EGP26720;EGP22202;EGP29761;EGP05062;EGP12678;EGP26278;EGP21655	7	EGP32116;EGP18386;EGP22357;EGP32367	4
Biological process	GO:0009759	indole glucosinolate biosynthetic process	3/1312	0.0346307	3	EGP16108;novel.2410;EGP16106	novel.2410	1	EGP16108;EGP16106	2
Biological process	GO:0010248	establishment or maintenance of transmembrane electrochemical gradient	3/1312	0.0346307	3	EGP10096;EGP13890;EGP19523	EGP10096;EGP19523	2	EGP13890	1
Biological process	GO:1901141	regulation of lignin biosynthetic process	3/1312	0.0346307	3	EGP02432;EGP06849;EGP09347	EGP06849;EGP09347	2	EGP02432	1
Biological process	GO:0055088	lipid homeostasis	7/1312	0.0351839	7	EGP31512;EGP15510;EGP23820;EGP04887;EGP00513;EGP18867;EGP31050	EGP31512;EGP15510;EGP04887	3	EGP23820;EGP00513;EGP18867;EGP31050	4
Biological process	GO:0009966	regulation of signal transduction	41/1312	0.0352252	41	EGP26291;EGP07168;EGP28453;EGP28230;EGP05394;EGP04614;EGP13932;EGP28524;EGP07371;EGP22202;EGP21398;EGP05703;EGP29663;EGP14278;EGP00626;EGP09831;EGP02938;EGP00669;EGP14377;EGP16121;EGP31804;EGP10181;EGP15832;EGP31068;EGP00176;EGP26552;EGP32309;EGP09657;EGP29483;EGP11081;EGP00889;EGP32311;EGP22347;EGP21008;EGP14515;EGP18717;EGP14254;EGP02465;EGP17750;EGP20561;EGP06847	EGP26291;EGP07168;EGP28230;EGP05394;EGP04614;EGP13932;EGP07371;EGP22202;EGP21398;EGP29663;EGP14278;EGP00626;EGP02938;EGP00669;EGP10181;EGP31068;EGP26552;EGP32309;EGP29483;EGP22347	20	EGP28453;EGP28524;EGP05703;EGP09831;EGP14377;EGP16121;EGP31804;EGP15832;EGP00176;EGP09657;EGP11081;EGP00889;EGP32311;EGP21008;EGP14515;EGP18717;EGP14254;EGP02465;EGP17750;EGP20561;EGP06847	21
Biological process	GO:0015743	malate transport	4/1312	0.0367478	4	EGP06737;EGP14277;EGP13540;EGP24154	EGP14277;EGP13540;EGP24154	3	EGP06737	1
Biological process	GO:0046185	aldehyde catabolic process	4/1312	0.0367478	4	EGP28179;EGP14516;EGP13615;EGP28180	EGP28179;EGP14516;EGP13615	3	EGP28180	1
Biological process	GO:0009867	jasmonic acid mediated signaling pathway	16/1312	0.0368792	16	EGP09355;EGP00667;EGP00309;EGP07396;EGP26552;EGP09657;EGP11081;EGP22347;EGP03250;EGP31080;EGP21008;EGP18717;novel.1173;EGP31050;EGP20561;EGP06847	EGP09355;EGP26552;EGP22347;EGP03250	4	EGP00667;EGP00309;EGP07396;EGP09657;EGP11081;EGP31080;EGP21008;EGP18717;novel.1173;EGP31050;EGP20561;EGP06847	12
Biological process	GO:0046890	regulation of lipid biosynthetic process	13/1312	0.0368873	13	EGP07168;EGP26007;EGP28298;EGP31207;EGP30711;EGP25951;EGP09921;EGP13860;EGP19885;EGP10724;EGP22548;EGP26512;EGP20291	EGP07168;EGP26007;EGP28298;EGP31207;EGP25951;EGP09921;EGP22548;EGP26512	8	EGP30711;EGP13860;EGP19885;EGP10724;EGP20291	5
Biological process	GO:0046916	cellular transition metal ion homeostasis	9/1312	0.0376967	9	EGP07130;EGP18914;EGP06058;EGP08971;EGP14970;novel.1002;EGP31143;EGP15718;EGP00513	EGP07130;EGP18914;EGP06058;EGP08971;EGP14970;EGP31143;EGP15718	7	novel.1002;EGP00513	2
Biological process	GO:0008356	asymmetric cell division	6/1312	0.0377067	6	EGP18355;EGP23891;EGP00669;EGP20714;EGP31975;EGP30225	EGP18355;EGP23891;EGP00669	3	EGP20714;EGP31975;EGP30225	3
Biological process	GO:0016577	histone demethylation	6/1312	0.0377067	6	EGP02830;EGP02831;EGP13379;EGP19849;EGP19847;EGP19848	EGP13379	1	EGP02830;EGP02831;EGP19849;EGP19847;EGP19848	5
Biological process	GO:0070076	histone lysine demethylation	6/1312	0.0377067	6	EGP02830;EGP02831;EGP13379;EGP19849;EGP19847;EGP19848	EGP13379	1	EGP02830;EGP02831;EGP19849;EGP19847;EGP19848	5
Biological process	GO:0009914	hormone transport	17/1312	0.0377504	17	EGP19886;EGP04614;EGP10096;EGP22231;EGP10512;EGP13537;EGP25924;EGP30737;EGP13890;EGP01682;EGP05419;EGP27005;EGP25925;EGP19523;EGP14515;EGP02387;EGP09666	EGP19886;EGP04614;EGP10096;EGP10512;EGP13537;EGP30737;EGP01682;EGP05419;EGP27005;EGP19523	10	EGP22231;EGP25924;EGP13890;EGP25925;EGP14515;EGP02387;EGP09666	7
Biological process	GO:0071398	cellular response to fatty acid	17/1312	0.0377504	17	EGP09355;EGP00667;EGP01662;EGP00309;EGP07396;EGP26552;EGP09657;EGP11081;EGP22347;EGP03250;EGP31080;EGP21008;EGP18717;novel.1173;EGP31050;EGP20561;EGP06847	EGP09355;EGP01662;EGP26552;EGP22347;EGP03250	5	EGP00667;EGP00309;EGP07396;EGP09657;EGP11081;EGP31080;EGP21008;EGP18717;novel.1173;EGP31050;EGP20561;EGP06847	12
Biological process	GO:0052386	cell wall thickening	5/1312	0.0388766	5	EGP28574;EGP16108;novel.2410;EGP31455;EGP16106	EGP28574;novel.2410;EGP31455	3	EGP16108;EGP16106	2
Biological process	GO:0009718	anthocyanin-containing compound biosynthetic process	7/1312	0.0389983	7	EGP18904;EGP21564;EGP32037;EGP25741;EGP21874;EGP16978;EGP31016	EGP18904;EGP21564;EGP32037;EGP25741;EGP21874;EGP16978;EGP31016	7	--	0
Biological process	GO:0009690	cytokinin metabolic process	10/1312	0.0390034	10	novel.1548;EGP28715;EGP20044;EGP24326;EGP21306;EGP09200;EGP08909;EGP28373;EGP09203;EGP06227	EGP28715;EGP21306;EGP09200;EGP08909;EGP09203;EGP06227	6	novel.1548;EGP20044;EGP24326;EGP28373	4
Biological process	GO:0009863	salicylic acid mediated signaling pathway	12/1312	0.0396196	12	EGP26720;EGP00667;EGP22202;EGP00626;EGP02938;EGP06424;EGP12678;EGP14716;EGP26552;EGP32309;EGP32311;EGP09678	EGP26720;EGP22202;EGP00626;EGP02938;EGP12678;EGP14716;EGP26552;EGP32309;EGP09678	9	EGP00667;EGP06424;EGP32311	3
Biological process	GO:0006482	protein demethylation	6/1312	0.0422881	6	EGP02830;EGP02831;EGP13379;EGP19849;EGP19847;EGP19848	EGP13379	1	EGP02830;EGP02831;EGP19849;EGP19847;EGP19848	5
Biological process	GO:0008214	protein dealkylation	6/1312	0.0422881	6	EGP02830;EGP02831;EGP13379;EGP19849;EGP19847;EGP19848	EGP13379	1	EGP02830;EGP02831;EGP19849;EGP19847;EGP19848	5
Biological process	GO:0048859	formation of anatomical boundary	4/1312	0.0435294	4	EGP13046;EGP13537;EGP19885;EGP09666	EGP13537	1	EGP13046;EGP19885;EGP09666	3
Biological process	GO:0090691	formation of plant organ boundary	4/1312	0.0435294	4	EGP13046;EGP13537;EGP19885;EGP09666	EGP13537	1	EGP13046;EGP19885;EGP09666	3
Biological process	GO:0009310	amine catabolic process	3/1312	0.0438847	3	EGP01191;EGP12760;EGP33631	EGP01191;EGP12760	2	EGP33631	1
Biological process	GO:0009800	cinnamic acid biosynthetic process	3/1312	0.0438847	3	EGP24622;novel.2017;EGP30701	EGP24622	1	novel.2017;EGP30701	2
Biological process	GO:0009803	cinnamic acid metabolic process	3/1312	0.0438847	3	EGP24622;novel.2017;EGP30701	EGP24622	1	novel.2017;EGP30701	2
Biological process	GO:0042343	indole glucosinolate metabolic process	3/1312	0.0438847	3	EGP16108;novel.2410;EGP16106	novel.2410	1	EGP16108;EGP16106	2
Biological process	GO:0042402	cellular biogenic amine catabolic process	3/1312	0.0438847	3	EGP01191;EGP12760;EGP33631	EGP01191;EGP12760	2	EGP33631	1
Biological process	GO:0010073	meristem maintenance	24/1312	0.0439845	24	EGP18355;EGP31343;EGP00309;EGP13046;EGP02631;EGP00669;EGP24326;EGP20751;EGP25915;EGP10076;EGP31975;EGP21830;EGP21306;EGP09200;EGP08909;EGP27880;EGP19885;EGP03250;EGP33822;EGP30679;EGP22548;novel.1173;EGP20291;EGP31362	EGP18355;EGP31343;EGP00669;EGP21830;EGP21306;EGP09200;EGP08909;EGP27880;EGP03250;EGP33822;EGP22548	11	EGP00309;EGP13046;EGP02631;EGP24326;EGP20751;EGP25915;EGP10076;EGP31975;EGP19885;EGP30679;novel.1173;EGP20291;EGP31362	13
Biological process	GO:0006558	L-phenylalanine metabolic process	5/1312	0.0444301	5	EGP24622;EGP00684;novel.2017;EGP06849;EGP09347	EGP24622;EGP00684;EGP06849;EGP09347	4	novel.2017	1
Biological process	GO:1902221	erythrose 4-phosphate/phosphoenolpyruvate family amino acid metabolic process	5/1312	0.0444301	5	EGP24622;EGP00684;novel.2017;EGP06849;EGP09347	EGP24622;EGP00684;EGP06849;EGP09347	4	novel.2017	1
Biological process	GO:0046148	pigment biosynthetic process	22/1312	0.044597	22	EGP18904;EGP21564;EGP32037;EGP28582;EGP25741;EGP21874;EGP26723;EGP16978;EGP31370;EGP15862;EGP04894;EGP19467;EGP24326;EGP31016;EGP19462;EGP21306;EGP09200;EGP08909;EGP30343;EGP30489;EGP33822;EGP19460	EGP18904;EGP21564;EGP32037;EGP25741;EGP21874;EGP26723;EGP16978;EGP04894;EGP19467;EGP31016;EGP21306;EGP09200;EGP08909;EGP30343;EGP33822;EGP19460	16	EGP28582;EGP31370;EGP15862;EGP24326;EGP19462;EGP30489	6
Biological process	GO:0042440	pigment metabolic process	25/1312	0.0452831	25	EGP18904;EGP21564;EGP32037;EGP28582;EGP25741;EGP21874;EGP01597;EGP26723;EGP16978;EGP31370;EGP15862;EGP16486;EGP04894;EGP19467;EGP24326;EGP31016;EGP18900;EGP19462;EGP21306;EGP09200;EGP08909;EGP30343;EGP30489;EGP33822;EGP19460	EGP18904;EGP21564;EGP32037;EGP25741;EGP21874;EGP26723;EGP16978;EGP16486;EGP04894;EGP19467;EGP31016;EGP21306;EGP09200;EGP08909;EGP30343;EGP33822;EGP19460	17	EGP28582;EGP01597;EGP31370;EGP15862;EGP24326;EGP18900;EGP19462;EGP30489	8
Biological process	GO:0120252	hydrocarbon metabolic process	11/1312	0.0454087	11	EGP07113;EGP01662;EGP05097;EGP02677;EGP21024;EGP29671;EGP31232;EGP19751;EGP19362;EGP00187;EGP00925	EGP01662;EGP05097;EGP02677;EGP29671;EGP31232	5	EGP07113;EGP21024;EGP19751;EGP19362;EGP00187;EGP00925	6
Biological process	GO:0010200	response to chitin	16/1312	0.045601	16	EGP28453;EGP26023;EGP30794;EGP28524;EGP14586;EGP18706;EGP23451;EGP24269;EGP00722;EGP15686;EGP11081;EGP21008;EGP02943;EGP00786;EGP18717;EGP24329	EGP26023;EGP30794;EGP14586;EGP18706;EGP23451;EGP00722;EGP02943;EGP24329	8	EGP28453;EGP28524;EGP24269;EGP15686;EGP11081;EGP21008;EGP00786;EGP18717	8
Biological process	GO:0010565	regulation of cellular ketone metabolic process	16/1312	0.045601	16	EGP13468;EGP07168;EGP28298;EGP30521;EGP31207;EGP10406;EGP30711;EGP25951;EGP09921;EGP13860;EGP19885;EGP10724;EGP27512;EGP22548;EGP26512;EGP20291	EGP13468;EGP07168;EGP28298;EGP31207;EGP10406;EGP25951;EGP09921;EGP27512;EGP22548;EGP26512	10	EGP30521;EGP30711;EGP13860;EGP19885;EGP10724;EGP20291	6
Biological process	GO:0016106	sesquiterpenoid biosynthetic process	9/1312	0.0479235	9	EGP07168;EGP31370;EGP15977;EGP30711;EGP19751;EGP16620;EGP10724;EGP18890;EGP22548	EGP07168;EGP15977;EGP22548	3	EGP31370;EGP30711;EGP19751;EGP16620;EGP10724;EGP18890	6
Biological process	GO:0009820	alkaloid metabolic process	12/1312	0.0479916	12	EGP12546;EGP26201;EGP16582;novel.187;novel.2443;EGP08887;EGP05624;EGP15267;EGP21833;novel.2386;EGP31155;novel.797	EGP12546;EGP26201;EGP16582;novel.187;EGP08887;EGP05624;EGP15267;novel.2386;novel.797	9	novel.2443;EGP21833;EGP31155	3
Biological process	GO:0010075	regulation of meristem growth	12/1312	0.0479916	12	EGP18355;EGP02631;EGP00669;EGP24326;EGP10076;EGP31975;EGP21306;EGP09200;EGP08909;EGP27880;EGP33822;EGP31362	EGP18355;EGP00669;EGP21306;EGP09200;EGP08909;EGP27880;EGP33822	7	EGP02631;EGP24326;EGP10076;EGP31975;EGP31362	5
Biological process	GO:0048443	stamen development	11/1312	0.0485341	11	EGP16692;EGP15937;EGP13537;EGP02631;EGP02878;EGP32116;EGP02877;EGP30584;EGP27167;EGP09875;EGP09666	EGP16692;EGP15937;EGP13537;EGP02878;EGP02877;EGP30584;EGP27167;EGP09875	8	EGP02631;EGP32116;EGP09666	3
Biological process	GO:0048466	androecium development	11/1312	0.0485341	11	EGP16692;EGP15937;EGP13537;EGP02631;EGP02878;EGP32116;EGP02877;EGP30584;EGP27167;EGP09875;EGP09666	EGP16692;EGP15937;EGP13537;EGP02878;EGP02877;EGP30584;EGP27167;EGP09875	8	EGP02631;EGP32116;EGP09666	3
Biological process	GO:0009787	regulation of abscisic acid-activated signaling pathway	19/1312	0.0489763	19	EGP26291;EGP07168;EGP05394;EGP07371;EGP05703;EGP29663;EGP14278;EGP00626;EGP14377;EGP16121;EGP31804;EGP15832;EGP00176;EGP26552;EGP29483;EGP00889;EGP14254;EGP02465;EGP17750	EGP26291;EGP07168;EGP05394;EGP07371;EGP29663;EGP14278;EGP00626;EGP26552;EGP29483	9	EGP05703;EGP14377;EGP16121;EGP31804;EGP15832;EGP00176;EGP00889;EGP14254;EGP02465;EGP17750	10
Biological process	GO:1901419	regulation of response to alcohol	19/1312	0.0489763	19	EGP26291;EGP07168;EGP05394;EGP07371;EGP05703;EGP29663;EGP14278;EGP00626;EGP14377;EGP16121;EGP31804;EGP15832;EGP00176;EGP26552;EGP29483;EGP00889;EGP14254;EGP02465;EGP17750	EGP26291;EGP07168;EGP05394;EGP07371;EGP29663;EGP14278;EGP00626;EGP26552;EGP29483	9	EGP05703;EGP14377;EGP16121;EGP31804;EGP15832;EGP00176;EGP00889;EGP14254;EGP02465;EGP17750	10
Biological process	GO:1905957	regulation of cellular response to alcohol	19/1312	0.0489763	19	EGP26291;EGP07168;EGP05394;EGP07371;EGP05703;EGP29663;EGP14278;EGP00626;EGP14377;EGP16121;EGP31804;EGP15832;EGP00176;EGP26552;EGP29483;EGP00889;EGP14254;EGP02465;EGP17750	EGP26291;EGP07168;EGP05394;EGP07371;EGP29663;EGP14278;EGP00626;EGP26552;EGP29483	9	EGP05703;EGP14377;EGP16121;EGP31804;EGP15832;EGP00176;EGP00889;EGP14254;EGP02465;EGP17750	10
Biological process	GO:0060249	anatomical structure homeostasis	8/1312	0.0503028	8	EGP02454;EGP10090;EGP20739;EGP02631;novel.775;EGP11225;EGP15437;EGP20087	EGP02454;EGP10090;novel.775;EGP20087	4	EGP20739;EGP02631;EGP11225;EGP15437	4
Biological process	GO:0015851	nucleobase transport	5/1312	0.0504333	5	EGP25924;novel.573;EGP25925;EGP30776;EGP02387	novel.573;EGP30776	2	EGP25924;EGP25925;EGP02387	3
Biological process	GO:0044264	cellular polysaccharide metabolic process	36/1312	0.0515603	36	EGP31337;EGP06071;EGP18419;EGP10901;EGP28160;EGP00919;EGP31225;EGP06299;EGP10096;EGP32972;EGP27962;EGP28574;EGP08658;EGP11409;EGP02234;EGP12766;EGP05448;EGP11314;EGP21392;EGP16394;novel.1115;EGP06995;EGP11626;EGP23939;EGP28487;EGP06555;EGP00220;EGP01207;EGP21950;EGP13890;EGP23619;EGP31455;EGP23428;EGP19523;EGP28106;EGP06204	EGP31337;EGP06071;EGP18419;EGP28160;EGP00919;EGP31225;EGP06299;EGP10096;EGP27962;EGP28574;EGP08658;EGP12766;EGP05448;EGP21392;novel.1115;EGP06995;EGP23939;EGP28487;EGP06555;EGP00220;EGP01207;EGP23619;EGP31455;EGP23428;EGP19523;EGP28106;EGP06204	27	EGP10901;EGP32972;EGP11409;EGP02234;EGP11314;EGP16394;EGP11626;EGP21950;EGP13890	9
Biological process	GO:0009687	abscisic acid metabolic process	9/1312	0.0517035	9	EGP07168;EGP31370;EGP30711;EGP28478;EGP20936;EGP10724;EGP18890;EGP22548;EGP19389	EGP07168;EGP28478;EGP22548	3	EGP31370;EGP30711;EGP20936;EGP10724;EGP18890;EGP19389	6
Biological process	GO:0043288	apocarotenoid metabolic process	9/1312	0.0517035	9	EGP07168;EGP31370;EGP30711;EGP28478;EGP20936;EGP10724;EGP18890;EGP22548;EGP19389	EGP07168;EGP28478;EGP22548	3	EGP31370;EGP30711;EGP20936;EGP10724;EGP18890;EGP19389	6
Biological process	GO:1902644	tertiary alcohol metabolic process	9/1312	0.0517035	9	EGP07168;EGP31370;EGP30711;EGP28478;EGP20936;EGP10724;EGP18890;EGP22548;EGP19389	EGP07168;EGP28478;EGP22548	3	EGP31370;EGP30711;EGP20936;EGP10724;EGP18890;EGP19389	6
Biological process	GO:0016126	sterol biosynthetic process	7/1312	0.0520224	7	EGP18943;EGP02677;EGP15709;EGP30737;EGP30785;EGP13435;EGP31128	EGP18943;EGP02677;EGP15709;EGP30737;EGP30785;EGP13435;EGP31128	7	--	0
Biological process	GO:0009740	gibberellic acid mediated signaling pathway	10/1312	0.0520974	10	EGP15862;EGP00669;EGP11294;novel.1818;EGP09921;novel.881;EGP31068;EGP11523;EGP14254;EGP17750	EGP00669;novel.1818;EGP09921;EGP31068	4	EGP15862;EGP11294;novel.881;EGP11523;EGP14254;EGP17750	6
Biological process	GO:0010476	gibberellin mediated signaling pathway	10/1312	0.0520974	10	EGP15862;EGP00669;EGP11294;novel.1818;EGP09921;novel.881;EGP31068;EGP11523;EGP14254;EGP17750	EGP00669;novel.1818;EGP09921;EGP31068	4	EGP15862;EGP11294;novel.881;EGP11523;EGP14254;EGP17750	6
Biological process	GO:0006026	aminoglycan catabolic process	6/1312	0.0524598	6	EGP33477;EGP33483;EGP24061;EGP30841;EGP30844;EGP30839	EGP33477;EGP33483;EGP24061;EGP30841;EGP30844;EGP30839	6	--	0
Biological process	GO:0006030	chitin metabolic process	6/1312	0.0524598	6	EGP33477;EGP33483;EGP24061;EGP30841;EGP30844;EGP30839	EGP33477;EGP33483;EGP24061;EGP30841;EGP30844;EGP30839	6	--	0
Biological process	GO:0006032	chitin catabolic process	6/1312	0.0524598	6	EGP33477;EGP33483;EGP24061;EGP30841;EGP30844;EGP30839	EGP33477;EGP33483;EGP24061;EGP30841;EGP30844;EGP30839	6	--	0
Biological process	GO:0046348	amino sugar catabolic process	6/1312	0.0524598	6	EGP33477;EGP33483;EGP24061;EGP30841;EGP30844;EGP30839	EGP33477;EGP33483;EGP24061;EGP30841;EGP30844;EGP30839	6	--	0
Biological process	GO:1901072	glucosamine-containing compound catabolic process	6/1312	0.0524598	6	EGP33477;EGP33483;EGP24061;EGP30841;EGP30844;EGP30839	EGP33477;EGP33483;EGP24061;EGP30841;EGP30844;EGP30839	6	--	0
Biological process	GO:2000026	regulation of multicellular organismal development	40/1312	0.0540003	40	EGP05394;EGP18355;EGP30794;EGP32996;EGP26174;EGP30387;EGP11627;EGP15862;EGP26667;EGP29927;EGP10195;novel.2203;EGP13042;EGP20751;EGP30362;EGP25915;EGP10981;EGP13201;EGP31975;EGP33390;novel.2235;EGP31068;EGP20185;EGP13860;EGP00176;EGP04218;EGP05747;EGP00889;EGP17008;novel.2165;EGP14515;EGP08799;EGP04011;EGP21606;EGP09489;EGP21903;EGP26512;EGP10982;EGP31072;novel.460	EGP05394;EGP18355;EGP30794;EGP32996;EGP26174;EGP30387;EGP11627;EGP26667;EGP29927;EGP10195;EGP13042;EGP30362;EGP10981;EGP33390;EGP31068;EGP04218;EGP17008;novel.2165;EGP08799;EGP21606;EGP21903;EGP26512;EGP31072;novel.460	24	EGP15862;novel.2203;EGP20751;EGP25915;EGP13201;EGP31975;novel.2235;EGP20185;EGP13860;EGP00176;EGP05747;EGP00889;EGP14515;EGP04011;EGP09489;EGP10982	16
Biological process	GO:0007050	cell cycle arrest	3/1312	0.0542326	3	EGP16190;EGP12517;EGP20291	EGP16190	1	EGP12517;EGP20291	2
Biological process	GO:0080036	regulation of cytokinin-activated signaling pathway	3/1312	0.0542326	3	EGP13932;EGP21398;EGP09831	EGP13932;EGP21398	2	EGP09831	1
Biological process	GO:0014070	response to organic cyclic compound	38/1312	0.0551862	38	EGP07168;EGP26007;EGP26720;EGP13641;EGP12804;EGP30564;EGP00667;EGP09526;EGP22202;EGP00302;EGP00626;EGP15977;EGP02938;EGP18377;EGP20751;EGP16572;EGP06424;novel.1818;EGP01682;EGP16620;EGP18158;EGP12678;EGP00531;EGP27510;EGP14716;EGP26552;EGP32309;EGP13526;EGP11081;EGP32311;EGP31078;EGP09678;EGP31080;EGP21008;EGP08799;EGP18717;EGP09489;EGP31050	EGP07168;EGP26007;EGP26720;EGP12804;EGP09526;EGP22202;EGP00626;EGP15977;EGP02938;EGP18377;EGP16572;novel.1818;EGP01682;EGP12678;EGP00531;EGP14716;EGP26552;EGP32309;EGP13526;EGP09678;EGP08799	21	EGP13641;EGP30564;EGP00667;EGP00302;EGP20751;EGP06424;EGP16620;EGP18158;EGP27510;EGP11081;EGP32311;EGP31078;EGP31080;EGP21008;EGP18717;EGP09489;EGP31050	17
Biological process	GO:0071370	cellular response to gibberellin stimulus	10/1312	0.0557766	10	EGP15862;EGP00669;EGP11294;novel.1818;EGP09921;novel.881;EGP31068;EGP11523;EGP14254;EGP17750	EGP00669;novel.1818;EGP09921;EGP31068	4	EGP15862;EGP11294;novel.881;EGP11523;EGP14254;EGP17750	6
Biological process	GO:0042335	cuticle development	5/1312	0.0568882	5	EGP05097;EGP08904;EGP02677;EGP23937;EGP00784	EGP05097;EGP02677	2	EGP08904;EGP23937;EGP00784	3
Biological process	GO:0008037	cell recognition	14/1312	0.0571734	14	EGP30567;EGP28975;EGP11761;EGP30564;EGP23948;EGP08711;EGP00805;EGP02219;EGP02214;EGP30496;EGP02218;EGP28340;EGP30495;EGP30497	EGP08711;EGP00805;EGP02219;EGP30496;EGP02218;EGP28340;EGP30495;EGP30497	8	EGP30567;EGP28975;EGP11761;EGP30564;EGP23948;EGP02214	6
Biological process	GO:0006829	zinc ion transport	4/1312	0.0590469	4	EGP15691;EGP16717;EGP30253;EGP30725	EGP15691	1	EGP16717;EGP30253;EGP30725	3
Biological process	GO:0008544	epidermis development	4/1312	0.0590469	4	EGP21679;EGP03122;EGP18355;EGP31975	EGP21679;EGP18355	2	EGP03122;EGP31975	2
Biological process	GO:0009593	detection of chemical stimulus	4/1312	0.0590469	4	EGP31632;EGP29841;novel.2409;EGP10481	EGP31632;EGP29841;EGP10481	3	novel.2409	1
Biological process	GO:0009695	jasmonic acid biosynthetic process	4/1312	0.0590469	4	EGP33690;EGP12316;EGP31080;EGP28561	EGP33690	1	EGP12316;EGP31080;EGP28561	3
Biological process	GO:0009913	epidermal cell differentiation	4/1312	0.0590469	4	EGP21679;EGP03122;EGP18355;EGP31975	EGP21679;EGP18355	2	EGP03122;EGP31975	2
Biological process	GO:0030855	epithelial cell differentiation	4/1312	0.0590469	4	EGP21679;EGP03122;EGP18355;EGP31975	EGP21679;EGP18355	2	EGP03122;EGP31975	2
Biological process	GO:0080163	regulation of protein serine/threonine phosphatase activity	4/1312	0.0590469	4	EGP17805;EGP16278;EGP18709;EGP16279	EGP16278;EGP18709;EGP16279	3	EGP17805	1
Biological process	GO:0080186	developmental vegetative growth	8/1312	0.059095	8	EGP07168;EGP02878;EGP24326;EGP02877;EGP21306;EGP09200;EGP08909;EGP31080	EGP07168;EGP02878;EGP02877;EGP21306;EGP09200;EGP08909	6	EGP24326;EGP31080	2
Biological process	GO:0000910	cytokinesis	12/1312	0.0609328	12	EGP10901;EGP23891;EGP27962;EGP16394;EGP01400;EGP01207;EGP20726;EGP21352;EGP23428;EGP01402;EGP01401;EGP28106	EGP23891;EGP27962;EGP01400;EGP01207;EGP20726;EGP23428;EGP01402;EGP01401;EGP28106	9	EGP10901;EGP16394;EGP21352	3
Biological process	GO:0048580	regulation of post-embryonic development	37/1312	0.0632713	37	EGP05394;EGP30794;EGP32996;EGP26174;EGP30387;EGP11627;EGP15862;EGP26667;EGP29927;EGP10195;novel.2203;EGP13042;EGP20751;EGP30362;EGP25915;EGP10981;EGP13201;EGP33390;novel.2235;EGP31068;EGP20185;EGP13860;EGP00176;EGP04218;EGP05747;EGP00889;EGP17008;novel.2165;EGP14515;EGP08799;EGP04011;EGP21606;EGP09489;EGP21903;EGP26512;EGP10982;novel.460	EGP05394;EGP30794;EGP32996;EGP26174;EGP30387;EGP11627;EGP26667;EGP29927;EGP10195;EGP13042;EGP30362;EGP10981;EGP33390;EGP31068;EGP04218;EGP17008;novel.2165;EGP08799;EGP21606;EGP21903;EGP26512;novel.460	22	EGP15862;novel.2203;EGP20751;EGP25915;EGP13201;novel.2235;EGP20185;EGP13860;EGP00176;EGP05747;EGP00889;EGP14515;EGP04011;EGP09489;EGP10982	15
Biological process	GO:1901616	organic hydroxy compound catabolic process	8/1312	0.0638319	8	EGP19170;EGP07193;EGP07192;EGP28478;EGP20936;EGP13526;EGP19389;EGP12460	EGP07193;EGP07192;EGP28478;EGP13526	4	EGP19170;EGP20936;EGP19389;EGP12460	4
Biological process	GO:0035304	regulation of protein dephosphorylation	6/1312	0.063997	6	EGP17805;EGP20657;EGP16278;EGP18709;EGP18281;EGP16279	EGP16278;EGP18709;EGP18281;EGP16279	4	EGP17805;EGP20657	2
Biological process	GO:0071395	cellular response to jasmonic acid stimulus	16/1312	0.064206	16	EGP09355;EGP00667;EGP00309;EGP07396;EGP26552;EGP09657;EGP11081;EGP22347;EGP03250;EGP31080;EGP21008;EGP18717;novel.1173;EGP31050;EGP20561;EGP06847	EGP09355;EGP26552;EGP22347;EGP03250	4	EGP00667;EGP00309;EGP07396;EGP09657;EGP11081;EGP31080;EGP21008;EGP18717;novel.1173;EGP31050;EGP20561;EGP06847	12
Biological process	GO:0016052	carbohydrate catabolic process	31/1312	0.065314	31	EGP15975;EGP06071;EGP02033;EGP09617;EGP32972;EGP16225;EGP05448;EGP22915;EGP00235;EGP30962;EGP07193;EGP07298;EGP07192;EGP33477;EGP33483;EGP04541;EGP08711;EGP06995;EGP05701;EGP09616;EGP13071;EGP00234;EGP33662;EGP33659;EGP24061;EGP30841;EGP30844;EGP30839;EGP24557;EGP04011;EGP28107	EGP15975;EGP06071;EGP02033;EGP16225;EGP05448;EGP22915;EGP00235;EGP30962;EGP07193;EGP07298;EGP07192;EGP33477;EGP33483;EGP04541;EGP08711;EGP06995;EGP05701;EGP09616;EGP13071;EGP00234;EGP33662;EGP24061;EGP30841;EGP30844;EGP30839;EGP28107	26	EGP09617;EGP32972;EGP33659;EGP24557;EGP04011	5
Biological process	GO:0000077	DNA damage checkpoint	3/1312	0.0656284	3	EGP31754;EGP10090;EGP30715	EGP31754;EGP10090	2	EGP30715	1
Biological process	GO:0019048	modulation by virus of host process	3/1312	0.0656284	3	EGP19307;EGP02699;EGP19302	EGP19307;EGP02699;EGP19302	3	--	0
Biological process	GO:0044003	modulation by symbiont of host process	3/1312	0.0656284	3	EGP19307;EGP02699;EGP19302	EGP19307;EGP02699;EGP19302	3	--	0
Biological process	GO:2000280	regulation of root development	11/1312	0.0663379	11	EGP00309;EGP16610;EGP13221;EGP21830;EGP33166;EGP27880;EGP03250;EGP14515;novel.1702;novel.1173;EGP31379	EGP16610;EGP13221;EGP21830;EGP33166;EGP27880;EGP03250;novel.1702	7	EGP00309;EGP14515;novel.1173;EGP31379	4
Biological process	GO:0009723	response to ethylene	36/1312	0.0667281	36	EGP08843;EGP13468;EGP16692;EGP01384;EGP31283;EGP09355;EGP12845;EGP07371;EGP18706;EGP00686;EGP24213;EGP16610;EGP26858;EGP28434;EGP14769;EGP00626;EGP12536;EGP15937;EGP16353;EGP30915;EGP00722;EGP05005;EGP18881;EGP30458;EGP32320;EGP13860;EGP30421;EGP27510;EGP31080;EGP14515;EGP08799;EGP13955;EGP11523;EGP30701;EGP31379;EGP06893	EGP13468;EGP16692;EGP31283;EGP09355;EGP12845;EGP07371;EGP18706;EGP16610;EGP26858;EGP28434;EGP14769;EGP00626;EGP12536;EGP15937;EGP16353;EGP00722;EGP30458;EGP32320;EGP08799;EGP06893	20	EGP08843;EGP01384;EGP00686;EGP24213;EGP30915;EGP05005;EGP18881;EGP13860;EGP30421;EGP27510;EGP31080;EGP14515;EGP13955;EGP11523;EGP30701;EGP31379	16
Biological process	GO:0015740	C4-dicarboxylate transport	4/1312	0.0677683	4	EGP06737;EGP14277;EGP13540;EGP24154	EGP14277;EGP13540;EGP24154	3	EGP06737	1
Biological process	GO:0031570	DNA integrity checkpoint	4/1312	0.0677683	4	EGP31754;EGP10090;EGP30715;novel.1650	EGP31754;EGP10090;novel.1650	3	EGP30715	1
Biological process	GO:0009409	response to cold	36/1312	0.0685908	36	EGP11266;EGP05490;EGP19886;EGP10901;EGP05489;EGP13641;EGP30794;EGP15957;EGP14586;EGP26858;EGP18709;EGP24269;EGP02432;EGP16251;EGP29539;EGP25915;EGP10076;EGP30458;EGP05062;EGP18386;EGP04557;EGP22357;EGP27510;EGP11237;EGP32309;EGP29483;EGP32311;novel.1155;EGP21655;EGP00786;EGP18890;EGP26512;EGP12902;EGP19689;EGP11268;EGP31362	EGP05490;EGP19886;EGP05489;EGP30794;EGP14586;EGP26858;EGP18709;EGP16251;EGP29539;EGP30458;EGP05062;EGP04557;EGP32309;EGP29483;novel.1155;EGP21655;EGP26512;EGP12902;EGP19689	19	EGP11266;EGP10901;EGP13641;EGP15957;EGP24269;EGP02432;EGP25915;EGP10076;EGP18386;EGP22357;EGP27510;EGP11237;EGP32311;EGP00786;EGP18890;EGP11268;EGP31362	17
Biological process	GO:0034599	cellular response to oxidative stress	9/1312	0.0687445	9	EGP04328;EGP18914;EGP01662;EGP32018;EGP29598;novel.1002;EGP26198;EGP29636;EGP26196	EGP18914;EGP01662;EGP29598;EGP26198;EGP29636;EGP26196	6	EGP04328;EGP32018;novel.1002	3
Biological process	GO:1901615	organic hydroxy compound metabolic process	39/1312	0.0705049	39	EGP07168;EGP31512;EGP26007;EGP30521;EGP06277;EGP10406;EGP19170;EGP04332;EGP18943;EGP31370;EGP26804;EGP02677;EGP07193;EGP30711;EGP07192;EGP28478;EGP15709;EGP26805;EGP20936;EGP04887;EGP22133;EGP30737;EGP03182;EGP00513;EGP13526;EGP10724;EGP26802;EGP13773;EGP28561;EGP18867;EGP18890;EGP22548;EGP30785;EGP13435;EGP31128;EGP19389;EGP31050;EGP10869;EGP12460	EGP07168;EGP31512;EGP26007;EGP06277;EGP10406;EGP04332;EGP18943;EGP26804;EGP02677;EGP07193;EGP07192;EGP28478;EGP15709;EGP26805;EGP04887;EGP22133;EGP30737;EGP03182;EGP13526;EGP26802;EGP13773;EGP22548;EGP30785;EGP13435;EGP31128;EGP10869	26	EGP30521;EGP19170;EGP31370;EGP30711;EGP20936;EGP00513;EGP10724;EGP28561;EGP18867;EGP18890;EGP19389;EGP31050;EGP12460	13
Biological process	GO:0006073	cellular glucan metabolic process	26/1312	0.070793	26	EGP18419;EGP10901;EGP00919;EGP31225;EGP10096;EGP27962;EGP08658;EGP11409;EGP02234;EGP12766;EGP11314;EGP21392;EGP16394;novel.1115;EGP06995;EGP11626;EGP23939;EGP06555;EGP00220;EGP01207;EGP13890;EGP23619;EGP23428;EGP19523;EGP28106;EGP06204	EGP18419;EGP00919;EGP31225;EGP10096;EGP27962;EGP08658;EGP12766;EGP21392;novel.1115;EGP06995;EGP23939;EGP06555;EGP00220;EGP01207;EGP23619;EGP23428;EGP19523;EGP28106;EGP06204	19	EGP10901;EGP11409;EGP02234;EGP11314;EGP16394;EGP11626;EGP13890	7
Biological process	GO:0016144	S-glycoside biosynthetic process	5/1312	0.0711498	5	EGP16108;novel.2410;novel.1516;EGP16209;EGP16106	novel.2410	1	EGP16108;novel.1516;EGP16209;EGP16106	4
Biological process	GO:0019758	glycosinolate biosynthetic process	5/1312	0.0711498	5	EGP16108;novel.2410;novel.1516;EGP16209;EGP16106	novel.2410	1	EGP16108;novel.1516;EGP16209;EGP16106	4
Biological process	GO:0019761	glucosinolate biosynthetic process	5/1312	0.0711498	5	EGP16108;novel.2410;novel.1516;EGP16209;EGP16106	novel.2410	1	EGP16108;novel.1516;EGP16209;EGP16106	4
Biological process	GO:0000723	telomere maintenance	7/1312	0.0731957	7	EGP02454;EGP10090;EGP20739;novel.775;EGP11225;EGP15437;EGP20087	EGP02454;EGP10090;novel.775;EGP20087	4	EGP20739;EGP11225;EGP15437	3
Biological process	GO:0006040	amino sugar metabolic process	7/1312	0.0731957	7	EGP12073;EGP33477;EGP33483;EGP24061;EGP30841;EGP30844;EGP30839	EGP33477;EGP33483;EGP24061;EGP30841;EGP30844;EGP30839	6	EGP12073	1
Biological process	GO:0032200	telomere organization	7/1312	0.0731957	7	EGP02454;EGP10090;EGP20739;novel.775;EGP11225;EGP15437;EGP20087	EGP02454;EGP10090;novel.775;EGP20087	4	EGP20739;EGP11225;EGP15437	3
Biological process	GO:0000041	transition metal ion transport	8/1312	0.0739946	8	EGP07130;EGP14970;EGP15691;EGP15718;EGP16717;EGP00513;EGP30253;EGP30725	EGP07130;EGP14970;EGP15691;EGP15718	4	EGP16717;EGP00513;EGP30253;EGP30725	4
Biological process	GO:0034605	cellular response to heat	8/1312	0.0739946	8	EGP13100;EGP10289;EGP15957;EGP16907;EGP20060;EGP33701;EGP27510;EGP21606	EGP13100;EGP10289;EGP16907;EGP20060;EGP33701;EGP21606	6	EGP15957;EGP27510	2
Biological process	GO:1900426	positive regulation of defense response to bacterium	8/1312	0.0739946	8	novel.646;EGP12857;novel.775;novel.993;EGP32309;EGP32367;EGP32311;novel.469	novel.646;EGP12857;novel.775;novel.993;EGP32309;novel.469	6	EGP32367;EGP32311	2
Biological process	GO:0044042	glucan metabolic process	26/1312	0.075575	26	EGP18419;EGP10901;EGP00919;EGP31225;EGP10096;EGP27962;EGP08658;EGP11409;EGP02234;EGP12766;EGP11314;EGP21392;EGP16394;novel.1115;EGP06995;EGP11626;EGP23939;EGP06555;EGP00220;EGP01207;EGP13890;EGP23619;EGP23428;EGP19523;EGP28106;EGP06204	EGP18419;EGP00919;EGP31225;EGP10096;EGP27962;EGP08658;EGP12766;EGP21392;novel.1115;EGP06995;EGP23939;EGP06555;EGP00220;EGP01207;EGP23619;EGP23428;EGP19523;EGP28106;EGP06204	19	EGP10901;EGP11409;EGP02234;EGP11314;EGP16394;EGP11626;EGP13890	7
Biological process	GO:0009639	response to red or far red light	22/1312	0.0766945	22	EGP31283;EGP00995;EGP19061;EGP16108;EGP31370;EGP15862;EGP13537;EGP28691;EGP22353;EGP21891;novel.2410;EGP33390;novel.2235;EGP21908;EGP20185;EGP00531;EGP19885;EGP31080;EGP09489;EGP09666;EGP26512;EGP16106	EGP31283;EGP00995;EGP19061;EGP13537;EGP28691;EGP21891;novel.2410;EGP33390;EGP21908;EGP00531;EGP26512	11	EGP16108;EGP31370;EGP15862;EGP22353;novel.2235;EGP20185;EGP19885;EGP31080;EGP09489;EGP09666;EGP16106	11
Biological process	GO:0055062	phosphate ion homeostasis	4/1312	0.0771143	4	EGP11410;EGP23800;EGP33545;EGP09921	EGP33545;EGP09921	2	EGP11410;EGP23800	2
Biological process	GO:0072506	trivalent inorganic anion homeostasis	4/1312	0.0771143	4	EGP11410;EGP23800;EGP33545;EGP09921	EGP33545;EGP09921	2	EGP11410;EGP23800	2
Biological process	GO:0006559	L-phenylalanine catabolic process	3/1312	0.0780172	3	EGP24622;EGP00684;novel.2017	EGP24622;EGP00684	2	novel.2017	1
Biological process	GO:0010563	negative regulation of phosphorus metabolic process	3/1312	0.0780172	3	EGP13379;EGP18709;EGP12517	EGP13379;EGP18709	2	EGP12517	1
Biological process	GO:0016135	saponin biosynthetic process	3/1312	0.0780172	3	EGP07113;EGP19187;EGP19186	EGP19187;EGP19186	2	EGP07113	1
Biological process	GO:0045936	negative regulation of phosphate metabolic process	3/1312	0.0780172	3	EGP13379;EGP18709;EGP12517	EGP13379;EGP18709	2	EGP12517	1
Biological process	GO:0051923	sulfation	3/1312	0.0780172	3	novel.1516;EGP22168;EGP22169	EGP22168;EGP22169	2	novel.1516	1
Biological process	GO:1902222	erythrose 4-phosphate/phosphoenolpyruvate family amino acid catabolic process	3/1312	0.0780172	3	EGP24622;EGP00684;novel.2017	EGP24622;EGP00684	2	novel.2017	1
Biological process	GO:0055081	anion homeostasis	5/1312	0.0789494	5	EGP11410;EGP09197;EGP23800;EGP33545;EGP09921	EGP09197;EGP33545;EGP09921	3	EGP11410;EGP23800	2
Biological process	GO:0010078	maintenance of root meristem identity	7/1312	0.0791787	7	EGP00309;EGP21830;EGP27880;EGP03250;EGP22548;novel.1173;EGP20291	EGP21830;EGP27880;EGP03250;EGP22548	4	EGP00309;novel.1173;EGP20291	3
Biological process	GO:0030244	cellulose biosynthetic process	12/1312	0.0801053	12	EGP10901;EGP27962;EGP08658;EGP21392;EGP16394;novel.1115;EGP23939;EGP06555;EGP00220;EGP01207;EGP23428;EGP28106	EGP27962;EGP08658;EGP21392;novel.1115;EGP23939;EGP06555;EGP00220;EGP01207;EGP23428;EGP28106	10	EGP10901;EGP16394	2
Biological process	GO:0048878	chemical homeostasis	36/1312	0.080544	36	EGP11410;EGP27346;EGP31512;EGP21158;EGP09197;EGP06737;EGP07130;EGP18914;EGP04614;EGP00884;EGP04891;EGP23800;EGP15510;EGP06058;EGP08971;EGP24990;EGP14970;EGP13677;EGP12788;EGP23820;novel.1002;EGP30372;novel.1053;EGP31143;EGP33545;EGP20714;EGP21127;EGP04887;EGP30796;EGP09921;EGP15718;EGP00513;EGP27512;EGP14515;EGP18867;EGP31050	EGP31512;EGP21158;EGP09197;EGP07130;EGP18914;EGP04614;EGP15510;EGP06058;EGP08971;EGP24990;EGP14970;EGP12788;EGP31143;EGP33545;EGP21127;EGP04887;EGP09921;EGP15718;EGP27512	19	EGP11410;EGP27346;EGP06737;EGP00884;EGP04891;EGP23800;EGP13677;EGP23820;novel.1002;EGP30372;novel.1053;EGP20714;EGP30796;EGP00513;EGP14515;EGP18867;EGP31050	17
Biological process	GO:0048438	floral whorl development	19/1312	0.0807048	19	EGP16692;EGP06308;EGP31343;EGP13046;EGP15937;EGP13537;EGP02631;EGP02878;EGP14253;EGP32116;EGP02877;EGP24145;EGP04733;EGP21352;EGP30584;EGP27167;EGP09875;EGP30679;EGP09666	EGP16692;EGP31343;EGP15937;EGP13537;EGP02878;EGP14253;EGP02877;EGP24145;EGP04733;EGP30584;EGP27167;EGP09875	12	EGP06308;EGP13046;EGP02631;EGP32116;EGP21352;EGP30679;EGP09666	7
Biological process	GO:0019216	regulation of lipid metabolic process	13/1312	0.0807681	13	EGP07168;EGP26007;EGP28298;EGP31207;EGP30711;EGP25951;EGP09921;EGP13860;EGP19885;EGP10724;EGP22548;EGP26512;EGP20291	EGP07168;EGP26007;EGP28298;EGP31207;EGP25951;EGP09921;EGP22548;EGP26512	8	EGP30711;EGP13860;EGP19885;EGP10724;EGP20291	5
Biological process	GO:0048544	recognition of pollen	13/1312	0.0848061	13	EGP30567;EGP28975;EGP11761;EGP30564;EGP23948;EGP00805;EGP02219;EGP02214;EGP30496;EGP02218;EGP28340;EGP30495;EGP30497	EGP00805;EGP02219;EGP30496;EGP02218;EGP28340;EGP30495;EGP30497	7	EGP30567;EGP28975;EGP11761;EGP30564;EGP23948;EGP02214	6
Biological process	GO:1901606	alpha-amino acid catabolic process	8/1312	0.0850793	8	EGP24622;EGP31475;EGP00684;EGP02960;novel.2017;EGP09532;EGP18457;EGP21129	EGP24622;EGP00684;EGP02960;EGP09532;EGP18457;EGP21129	6	EGP31475;novel.2017	2
Biological process	GO:1900376	regulation of secondary metabolite biosynthetic process	4/1312	0.0870676	4	EGP02432;EGP06849;EGP16209;EGP09347	EGP06849;EGP09347	2	EGP02432;EGP16209	2
Biological process	GO:0051259	protein complex oligomerization	9/1312	0.0889245	9	EGP09623;EGP05897;EGP33526;EGP02591;EGP30625;EGP10410;EGP16604;EGP10851;EGP18457	EGP09623;EGP05897;EGP33526;EGP02591;EGP10410;EGP16604;EGP18457	7	EGP30625;EGP10851	2
Biological process	GO:0090332	stomatal closure	9/1312	0.0889245	9	EGP21158;EGP08919;novel.2409;EGP13540;EGP10076;EGP05419;EGP19721;EGP29483;EGP31362	EGP21158;EGP13540;EGP05419;EGP19721;EGP29483	5	EGP08919;novel.2409;EGP10076;EGP31362	4
Biological process	GO:0090693	plant organ senescence	21/1312	0.0900638	21	EGP27346;EGP02760;EGP12845;EGP09649;EGP04891;EGP16353;EGP03181;novel.2203;EGP05946;EGP21127;EGP30061;EGP16713;EGP00176;EGP30049;EGP13526;EGP11081;EGP00889;EGP30057;EGP21008;EGP18717;EGP09489	EGP12845;EGP09649;EGP16353;EGP03181;EGP21127;EGP30061;EGP16713;EGP30049;EGP13526	9	EGP27346;EGP02760;EGP04891;novel.2203;EGP05946;EGP00176;EGP11081;EGP00889;EGP30057;EGP21008;EGP18717;EGP09489	12
Biological process	GO:0006022	aminoglycan metabolic process	6/1312	0.091177	6	EGP33477;EGP33483;EGP24061;EGP30841;EGP30844;EGP30839	EGP33477;EGP33483;EGP24061;EGP30841;EGP30844;EGP30839	6	--	0
Biological process	GO:0045786	negative regulation of cell cycle	10/1312	0.0913205	10	novel.2248;EGP31754;EGP10090;EGP13377;EGP30715;EGP16190;novel.1650;EGP12517;EGP20714;EGP20291	novel.2248;EGP31754;EGP10090;EGP16190;novel.1650	5	EGP13377;EGP30715;EGP12517;EGP20714;EGP20291	5
Biological process	GO:0070592	cell wall polysaccharide biosynthetic process	10/1312	0.0913205	10	EGP31337;EGP28160;EGP00919;EGP06299;EGP28574;EGP11314;EGP28487;EGP06555;EGP00220;EGP31455	EGP31337;EGP28160;EGP00919;EGP06299;EGP28574;EGP28487;EGP06555;EGP00220;EGP31455	9	EGP11314	1
Biological process	GO:0010088	phloem development	3/1312	0.0913375	3	EGP13221;EGP11940;EGP22548	EGP13221;EGP11940;EGP22548	3	--	0
Biological process	GO:0080027	response to herbivore	3/1312	0.0913375	3	EGP02760;EGP31078;EGP18457	EGP18457	1	EGP02760;EGP31078	2
Biological process	GO:0009735	response to cytokinin	13/1312	0.0932572	13	EGP25884;novel.1548;EGP28160;EGP19061;EGP13932;EGP21398;EGP30078;EGP10195;EGP09831;EGP28335;EGP28373;EGP11523;EGP06227	EGP25884;EGP28160;EGP19061;EGP13932;EGP21398;EGP10195;EGP28335;EGP06227	8	novel.1548;EGP30078;EGP09831;EGP28373;EGP11523	5
Biological process	GO:0009926	auxin polar transport	13/1312	0.0932572	13	EGP19886;EGP04614;EGP10096;EGP22231;EGP10512;EGP13537;EGP13890;EGP01682;EGP05419;EGP27005;EGP19523;EGP14515;EGP09666	EGP19886;EGP04614;EGP10096;EGP10512;EGP13537;EGP01682;EGP05419;EGP27005;EGP19523	9	EGP22231;EGP13890;EGP14515;EGP09666	4
Biological process	GO:0050801	ion homeostasis	26/1312	0.0940342	26	EGP11410;EGP27346;EGP21158;EGP09197;EGP06737;EGP07130;EGP18914;EGP00884;EGP04891;EGP23800;EGP06058;EGP08971;EGP24990;EGP14970;EGP13677;EGP12788;novel.1002;EGP30372;novel.1053;EGP31143;EGP33545;EGP20714;EGP21127;EGP09921;EGP15718;EGP00513	EGP21158;EGP09197;EGP07130;EGP18914;EGP06058;EGP08971;EGP24990;EGP14970;EGP12788;EGP31143;EGP33545;EGP21127;EGP09921;EGP15718	14	EGP11410;EGP27346;EGP06737;EGP00884;EGP04891;EGP23800;EGP13677;novel.1002;EGP30372;novel.1053;EGP20714;EGP00513	12
Biological process	GO:1901136	carbohydrate derivative catabolic process	9/1312	0.0944632	9	EGP09193;EGP13754;EGP21563;EGP33477;EGP33483;EGP24061;EGP30841;EGP30844;EGP30839	EGP09193;EGP13754;EGP21563;EGP33477;EGP33483;EGP24061;EGP30841;EGP30844;EGP30839	9	--	0
Biological process	GO:0019915	lipid storage	4/1312	0.0976073	4	EGP30387;EGP29927;EGP30362;EGP21903	EGP30387;EGP29927;EGP30362;EGP21903	4	--	0
Biological process	GO:1901652	response to peptide	4/1312	0.0976073	4	EGP02631;EGP21830;EGP18485;EGP21716	EGP21830;EGP18485;EGP21716	3	EGP02631	1
Biological process	GO:0042126	nitrate metabolic process	6/1312	0.0988129	6	EGP15510;EGP23820;EGP27612;EGP22509;EGP06370;EGP10470	EGP15510;EGP22509;EGP06370;EGP10470	4	EGP23820;EGP27612	2
Biological process	GO:0042128	nitrate assimilation	6/1312	0.0988129	6	EGP15510;EGP23820;EGP27612;EGP22509;EGP06370;EGP10470	EGP15510;EGP22509;EGP06370;EGP10470	4	EGP23820;EGP27612	2
Biological process	GO:0016054	organic acid catabolic process	17/1312	0.100996	17	EGP24622;EGP28298;EGP31207;EGP31475;EGP33690;EGP00684;EGP02960;EGP28478;novel.2017;EGP08711;EGP20936;EGP25951;EGP09532;EGP13526;EGP18457;EGP21129;EGP19389	EGP24622;EGP28298;EGP31207;EGP33690;EGP00684;EGP02960;EGP28478;EGP08711;EGP25951;EGP09532;EGP13526;EGP18457;EGP21129	13	EGP31475;novel.2017;EGP20936;EGP19389	4
Biological process	GO:0010413	glucuronoxylan metabolic process	3/1312	0.105523	3	EGP28574;EGP28487;EGP31455	EGP28574;EGP28487;EGP31455	3	--	0
Biological process	GO:0010417	glucuronoxylan biosynthetic process	3/1312	0.105523	3	EGP28574;EGP28487;EGP31455	EGP28574;EGP28487;EGP31455	3	--	0
Biological process	GO:0015807	L-amino acid transport	3/1312	0.105523	3	EGP09449;EGP15134;EGP31781	EGP09449	1	EGP15134;EGP31781	2
Biological process	GO:0051055	negative regulation of lipid biosynthetic process	3/1312	0.105523	3	EGP26007;EGP09921;EGP20291	EGP26007;EGP09921	2	EGP20291	1
Biological process	GO:0010311	lateral root formation	6/1312	0.106776	6	EGP16692;EGP19061;EGP15937;EGP12517;EGP30796;EGP06431	EGP16692;EGP19061;EGP15937;EGP06431	4	EGP12517;EGP30796	2
Biological process	GO:0030243	cellulose metabolic process	13/1312	0.106872	13	EGP10901;EGP27962;EGP08658;EGP21392;EGP16394;novel.1115;EGP06995;EGP23939;EGP06555;EGP00220;EGP01207;EGP23428;EGP28106	EGP27962;EGP08658;EGP21392;novel.1115;EGP06995;EGP23939;EGP06555;EGP00220;EGP01207;EGP23428;EGP28106	11	EGP10901;EGP16394	2
Biological process	GO:0009408	response to heat	23/1312	0.108007	23	EGP09440;EGP05490;EGP05489;EGP05286;EGP28036;EGP13100;EGP30406;EGP10289;EGP09623;EGP15957;EGP16907;EGP33185;EGP31370;EGP05897;EGP30625;EGP10410;EGP20060;EGP33701;novel.929;EGP04557;EGP27510;EGP21606;EGP18890	EGP09440;EGP05490;EGP05489;EGP05286;EGP28036;EGP13100;EGP30406;EGP10289;EGP09623;EGP16907;EGP33185;EGP05897;EGP10410;EGP20060;EGP33701;EGP04557;EGP21606	17	EGP15957;EGP31370;EGP30625;novel.929;EGP27510;EGP18890	6
Biological process	GO:1901617	organic hydroxy compound biosynthetic process	23/1312	0.108007	23	EGP07168;EGP31512;EGP26007;EGP30521;EGP10406;EGP18943;EGP31370;EGP02677;EGP30711;EGP15709;EGP04887;EGP30737;EGP00513;EGP10724;EGP18867;EGP18890;EGP22548;EGP30785;EGP13435;EGP31128;EGP31050;EGP10869;EGP12460	EGP07168;EGP31512;EGP26007;EGP10406;EGP18943;EGP02677;EGP15709;EGP04887;EGP30737;EGP22548;EGP30785;EGP13435;EGP31128;EGP10869	14	EGP30521;EGP31370;EGP30711;EGP00513;EGP10724;EGP18867;EGP18890;EGP31050;EGP12460	9
Biological process	GO:0010119	regulation of stomatal movement	15/1312	0.108642	15	EGP21158;EGP13655;EGP05394;novel.2409;EGP05833;EGP10076;EGP10470;EGP05419;EGP00176;EGP33363;EGP19721;EGP29483;EGP00889;EGP33822;EGP31362	EGP21158;EGP13655;EGP05394;EGP05833;EGP10470;EGP05419;EGP33363;EGP19721;EGP29483;EGP33822	10	novel.2409;EGP10076;EGP00176;EGP00889;EGP31362	5
Biological process	GO:0010043	response to zinc ion	4/1312	0.10871	4	EGP21158;EGP16631;EGP09863;EGP31114	EGP21158;EGP16631;EGP09863;EGP31114	4	--	0
Biological process	GO:0010116	positive regulation of abscisic acid biosynthetic process	4/1312	0.10871	4	EGP07168;EGP30711;EGP10724;EGP22548	EGP07168;EGP22548	2	EGP30711;EGP10724	2
Biological process	GO:0010167	response to nitrate	4/1312	0.10871	4	EGP27346;EGP13641;EGP04891;EGP21127	EGP21127	1	EGP27346;EGP13641;EGP04891	3
Biological process	GO:0060429	epithelium development	4/1312	0.10871	4	EGP21679;EGP03122;EGP18355;EGP31975	EGP21679;EGP18355	2	EGP03122;EGP31975	2
Biological process	GO:0048527	lateral root development	13/1312	0.11166	13	EGP16692;EGP19061;EGP28524;EGP15937;EGP13537;EGP12517;EGP30796;EGP06431;EGP33662;EGP14515;EGP08799;EGP09666;EGP04311	EGP16692;EGP19061;EGP15937;EGP13537;EGP06431;EGP33662;EGP08799;EGP04311	8	EGP28524;EGP12517;EGP30796;EGP14515;EGP09666	5
Biological process	GO:0009834	plant-type secondary cell wall biogenesis	10/1312	0.113221	10	EGP31337;EGP06299;EGP14030;EGP06849;EGP28487;EGP18474;EGP18341;EGP21647;EGP09347;EGP18016	EGP31337;EGP06299;EGP14030;EGP06849;EGP28487;EGP21647;EGP09347	7	EGP18474;EGP18341;EGP18016	3
Biological process	GO:0060918	auxin transport	14/1312	0.114922	14	EGP19886;EGP04614;EGP10096;EGP22231;EGP10512;EGP13537;EGP30737;EGP13890;EGP01682;EGP05419;EGP27005;EGP19523;EGP14515;EGP09666	EGP19886;EGP04614;EGP10096;EGP10512;EGP13537;EGP30737;EGP01682;EGP05419;EGP27005;EGP19523	10	EGP22231;EGP13890;EGP14515;EGP09666	4
Biological process	GO:0035303	regulation of dephosphorylation	6/1312	0.115059	6	EGP17805;EGP20657;EGP16278;EGP18709;EGP18281;EGP16279	EGP16278;EGP18709;EGP18281;EGP16279	4	EGP17805;EGP20657	2
Biological process	GO:0035266	meristem growth	12/1312	0.117912	12	EGP18355;EGP02631;EGP00669;EGP24326;EGP10076;EGP31975;EGP21306;EGP09200;EGP08909;EGP27880;EGP33822;EGP31362	EGP18355;EGP00669;EGP21306;EGP09200;EGP08909;EGP27880;EGP33822	7	EGP02631;EGP24326;EGP10076;EGP31975;EGP31362	5
Biological process	GO:0120251	hydrocarbon biosynthetic process	9/1312	0.118568	9	EGP07113;EGP01662;EGP05097;EGP02677;EGP21024;EGP29671;EGP31232;EGP00187;EGP00925	EGP01662;EGP05097;EGP02677;EGP29671;EGP31232	5	EGP07113;EGP21024;EGP00187;EGP00925	4
Biological process	GO:0044038	cell wall macromolecule biosynthetic process	10/1312	0.11912	10	EGP31337;EGP28160;EGP00919;EGP06299;EGP28574;EGP11314;EGP28487;EGP06555;EGP00220;EGP31455	EGP31337;EGP28160;EGP00919;EGP06299;EGP28574;EGP28487;EGP06555;EGP00220;EGP31455	9	EGP11314	1
Biological process	GO:0070589	cellular component macromolecule biosynthetic process	10/1312	0.11912	10	EGP31337;EGP28160;EGP00919;EGP06299;EGP28574;EGP11314;EGP28487;EGP06555;EGP00220;EGP31455	EGP31337;EGP28160;EGP00919;EGP06299;EGP28574;EGP28487;EGP06555;EGP00220;EGP31455	9	EGP11314	1
Biological process	GO:0007267	cell-cell signaling	4/1312	0.120349	4	EGP11220;EGP18844;EGP00854;EGP22548	EGP18844;EGP00854;EGP22548	3	EGP11220	1
Biological process	GO:0009937	regulation of gibberellic acid mediated signaling pathway	4/1312	0.120349	4	EGP00669;EGP31068;EGP14254;EGP17750	EGP00669;EGP31068	2	EGP14254;EGP17750	2
Biological process	GO:0019853	L-ascorbic acid biosynthetic process	4/1312	0.120349	4	EGP13468;EGP19572;EGP07193;EGP07192	EGP13468;EGP07193;EGP07192	3	EGP19572	1
Biological process	GO:1903959	regulation of anion transmembrane transport	4/1312	0.120349	4	EGP00884;EGP02699;EGP12788;EGP31485	EGP02699;EGP12788;EGP31485	3	EGP00884	1
Biological process	GO:0009684	indoleacetic acid biosynthetic process	3/1312	0.120504	3	EGP16108;novel.2410;EGP16106	novel.2410	1	EGP16108;EGP16106	2
Biological process	GO:0045833	negative regulation of lipid metabolic process	3/1312	0.120504	3	EGP26007;EGP09921;EGP20291	EGP26007;EGP09921	2	EGP20291	1
Biological process	GO:0005985	sucrose metabolic process	7/1312	0.120774	7	EGP10096;EGP11386;EGP01163;EGP32103;EGP13890;EGP19523;EGP04011	EGP10096;EGP32103;EGP19523	3	EGP11386;EGP01163;EGP13890;EGP04011	4
Biological process	GO:0048653	anther development	7/1312	0.120774	7	EGP02631;EGP02878;EGP32116;EGP02877;EGP30584;EGP27167;EGP09875	EGP02878;EGP02877;EGP30584;EGP27167;EGP09875	5	EGP02631;EGP32116	2
Biological process	GO:1900425	negative regulation of defense response to bacterium	6/1312	0.123655	6	EGP10406;EGP22202;EGP07261;novel.2165;novel.460;EGP16389	EGP10406;EGP22202;EGP07261;novel.2165;novel.460;EGP16389	6	--	0
Biological process	GO:0007018	microtubule-based movement	8/1312	0.123793	8	EGP18192;EGP07037;EGP01400;EGP30956;EGP18310;EGP01402;EGP01401;EGP00141	EGP07037;EGP01400;EGP30956;EGP01402;EGP01401;EGP00141	6	EGP18192;EGP18310	2
Biological process	GO:0016143	S-glycoside metabolic process	8/1312	0.123793	8	EGP28453;EGP16108;EGP07337;novel.2410;novel.1516;EGP29829;EGP16209;EGP16106	EGP07337;novel.2410;EGP29829	3	EGP28453;EGP16108;novel.1516;EGP16209;EGP16106	5
Biological process	GO:0019757	glycosinolate metabolic process	8/1312	0.123793	8	EGP28453;EGP16108;EGP07337;novel.2410;novel.1516;EGP29829;EGP16209;EGP16106	EGP07337;novel.2410;EGP29829	3	EGP28453;EGP16108;novel.1516;EGP16209;EGP16106	5
Biological process	GO:0019760	glucosinolate metabolic process	8/1312	0.123793	8	EGP28453;EGP16108;EGP07337;novel.2410;novel.1516;EGP29829;EGP16209;EGP16106	EGP07337;novel.2410;EGP29829	3	EGP28453;EGP16108;novel.1516;EGP16209;EGP16106	5
Biological process	GO:0009958	positive gravitropism	5/1312	0.124317	5	EGP01280;EGP13537;EGP21891;EGP21908;EGP09666	EGP13537;EGP21891;EGP21908	3	EGP01280;EGP09666	2
Biological process	GO:0062012	regulation of small molecule metabolic process	17/1312	0.12571	17	EGP13468;EGP07168;EGP28298;EGP30521;EGP31207;EGP10406;EGP30711;EGP25951;EGP09921;EGP13860;EGP16209;EGP19885;EGP10724;EGP27512;EGP22548;EGP26512;EGP20291	EGP13468;EGP07168;EGP28298;EGP31207;EGP10406;EGP25951;EGP09921;EGP27512;EGP22548;EGP26512	10	EGP30521;EGP30711;EGP13860;EGP16209;EGP19885;EGP10724;EGP20291	7
Biological process	GO:0010214	seed coat development	7/1312	0.128624	7	EGP21679;EGP32972;EGP12552;EGP05833;EGP21347;EGP20751;EGP29940	EGP21679;EGP12552;EGP05833;EGP29940	4	EGP32972;EGP21347;EGP20751	3
Biological process	GO:0006020	inositol metabolic process	4/1312	0.132495	4	EGP07193;EGP07192;EGP10869;EGP12460	EGP07193;EGP07192;EGP10869	3	EGP12460	1
Biological process	GO:0046274	lignin catabolic process	4/1312	0.132495	4	EGP24248;EGP31025;EGP13251;EGP18016	--	0	EGP24248;EGP31025;EGP13251;EGP18016	4
Biological process	GO:0071941	nitrogen cycle metabolic process	6/1312	0.132555	6	EGP15510;EGP23820;EGP27612;EGP22509;EGP06370;EGP10470	EGP15510;EGP22509;EGP06370;EGP10470	4	EGP23820;EGP27612	2
Biological process	GO:0062197	cellular response to chemical stress	12/1312	0.134335	12	EGP04328;EGP18914;EGP01662;EGP05703;EGP32018;EGP29663;EGP29598;novel.1002;EGP26198;EGP30372;EGP29636;EGP26196	EGP18914;EGP01662;EGP29663;EGP29598;EGP26198;EGP29636;EGP26196	7	EGP04328;EGP05703;EGP32018;novel.1002;EGP30372	5
Biological process	GO:0032196	transposition	5/1312	0.134582	5	EGP16756;novel.994;novel.1401;EGP08937;novel.1328	EGP16756;novel.994;novel.1401;EGP08937;novel.1328	5	--	0
Biological process	GO:0006189	'de novo' IMP biosynthetic process	3/1312	0.136208	3	EGP19038;EGP04894;novel.1884	EGP19038;EGP04894	2	novel.1884	1
Biological process	GO:0009683	indoleacetic acid metabolic process	3/1312	0.136208	3	EGP16108;novel.2410;EGP16106	novel.2410	1	EGP16108;EGP16106	2
Biological process	GO:0035821	modulation of process of other organism	3/1312	0.136208	3	EGP19307;EGP02699;EGP19302	EGP19307;EGP02699;EGP19302	3	--	0
Biological process	GO:0051817	modulation of process of other organism involved in symbiotic interaction	3/1312	0.136208	3	EGP19307;EGP02699;EGP19302	EGP19307;EGP02699;EGP19302	3	--	0
Biological process	GO:0071577	zinc ion transmembrane transport	3/1312	0.136208	3	EGP15691;EGP30253;EGP30725	EGP15691	1	EGP30253;EGP30725	2
Biological process	GO:0046283	anthocyanin-containing compound metabolic process	7/1312	0.136723	7	EGP18904;EGP21564;EGP32037;EGP25741;EGP21874;EGP16978;EGP31016	EGP18904;EGP21564;EGP32037;EGP25741;EGP21874;EGP16978;EGP31016	7	--	0
Biological process	GO:0042364	water-soluble vitamin biosynthetic process	8/1312	0.138453	8	EGP13468;EGP17030;EGP19572;EGP07193;EGP07192;EGP01212;EGP33757;EGP20638	EGP13468;EGP07193;EGP07192	3	EGP17030;EGP19572;EGP01212;EGP33757;EGP20638	5
Biological process	GO:0010150	leaf senescence	19/1312	0.145009	19	EGP27346;EGP02760;EGP12845;EGP09649;EGP04891;EGP03181;novel.2203;EGP21127;EGP30061;EGP16713;EGP00176;EGP30049;EGP13526;EGP11081;EGP00889;EGP30057;EGP21008;EGP18717;EGP09489	EGP12845;EGP09649;EGP03181;EGP21127;EGP30061;EGP16713;EGP30049;EGP13526	8	EGP27346;EGP02760;EGP04891;novel.2203;EGP00176;EGP11081;EGP00889;EGP30057;EGP21008;EGP18717;EGP09489	11
Biological process	GO:0034762	regulation of transmembrane transport	7/1312	0.145065	7	EGP00884;EGP02699;EGP29902;EGP12788;EGP31485;EGP19614;EGP19721	EGP02699;EGP29902;EGP12788;EGP31485;EGP19614;EGP19721	6	EGP00884	1
Biological process	GO:0034765	regulation of ion transmembrane transport	7/1312	0.145065	7	EGP00884;EGP02699;EGP29902;EGP12788;EGP31485;EGP19614;EGP19721	EGP02699;EGP29902;EGP12788;EGP31485;EGP19614;EGP19721	6	EGP00884	1
Biological process	GO:0009691	cytokinin biosynthetic process	4/1312	0.14512	4	novel.1548;EGP28715;EGP28373;EGP06227	EGP28715;EGP06227	2	novel.1548;EGP28373	2
Biological process	GO:0019852	L-ascorbic acid metabolic process	4/1312	0.14512	4	EGP13468;EGP19572;EGP07193;EGP07192	EGP13468;EGP07193;EGP07192	3	EGP19572	1
Biological process	GO:0033169	histone H3-K9 demethylation	4/1312	0.14512	4	EGP13379;EGP19849;EGP19847;EGP19848	EGP13379	1	EGP19849;EGP19847;EGP19848	3
Biological process	GO:1902932	positive regulation of alcohol biosynthetic process	4/1312	0.14512	4	EGP07168;EGP30711;EGP10724;EGP22548	EGP07168;EGP22548	2	EGP30711;EGP10724	2
Biological process	GO:0009692	ethylene metabolic process	5/1312	0.145211	5	EGP01662;EGP21024;EGP29671;EGP31232;EGP00925	EGP01662;EGP29671;EGP31232	3	EGP21024;EGP00925	2
Biological process	GO:0009693	ethylene biosynthetic process	5/1312	0.145211	5	EGP01662;EGP21024;EGP29671;EGP31232;EGP00925	EGP01662;EGP29671;EGP31232	3	EGP21024;EGP00925	2
Biological process	GO:0043449	cellular alkene metabolic process	5/1312	0.145211	5	EGP01662;EGP21024;EGP29671;EGP31232;EGP00925	EGP01662;EGP29671;EGP31232	3	EGP21024;EGP00925	2
Biological process	GO:0043450	alkene biosynthetic process	5/1312	0.145211	5	EGP01662;EGP21024;EGP29671;EGP31232;EGP00925	EGP01662;EGP29671;EGP31232	3	EGP21024;EGP00925	2
Biological process	GO:0045828	positive regulation of isoprenoid metabolic process	5/1312	0.145211	5	EGP07168;EGP30711;EGP10724;EGP22548;EGP26512	EGP07168;EGP22548;EGP26512	3	EGP30711;EGP10724	2
Biological process	GO:1900673	olefin metabolic process	5/1312	0.145211	5	EGP01662;EGP21024;EGP29671;EGP31232;EGP00925	EGP01662;EGP29671;EGP31232	3	EGP21024;EGP00925	2
Biological process	GO:1900674	olefin biosynthetic process	5/1312	0.145211	5	EGP01662;EGP21024;EGP29671;EGP31232;EGP00925	EGP01662;EGP29671;EGP31232	3	EGP21024;EGP00925	2
Biological process	GO:0006949	syncytium formation	2/1312	0.145637	2	EGP22028;EGP15681	EGP22028;EGP15681	2	--	0
Biological process	GO:0009969	xyloglucan biosynthetic process	2/1312	0.145637	2	EGP00919;EGP11314	EGP00919	1	EGP11314	1
Biological process	GO:0018107	peptidyl-threonine phosphorylation	2/1312	0.145637	2	EGP31292;EGP15832	EGP31292	1	EGP15832	1
Biological process	GO:0018210	peptidyl-threonine modification	2/1312	0.145637	2	EGP31292;EGP15832	EGP31292	1	EGP15832	1
Biological process	GO:0032957	inositol trisphosphate metabolic process	2/1312	0.145637	2	EGP19170;EGP10869	EGP10869	1	EGP19170	1
Biological process	GO:0034502	protein localization to chromosome	2/1312	0.145637	2	EGP02878;EGP02877	EGP02878;EGP02877	2	--	0
Biological process	GO:1900490	positive regulation of hydroxymethylglutaryl-CoA reductase (NADPH) activity	2/1312	0.145637	2	EGP08904;EGP23937	--	0	EGP08904;EGP23937	2
Biological process	GO:1901806	beta-glucoside biosynthetic process	2/1312	0.145637	2	EGP28165;EGP31178	EGP28165;EGP31178	2	--	0
Biological process	GO:1902457	negative regulation of stomatal opening	2/1312	0.145637	2	EGP00176;EGP00889	--	0	EGP00176;EGP00889	2
Biological process	GO:2001215	regulation of hydroxymethylglutaryl-CoA reductase (NADPH) activity	2/1312	0.145637	2	EGP08904;EGP23937	--	0	EGP08904;EGP23937	2
Biological process	GO:0051274	beta-glucan biosynthetic process	12/1312	0.145944	12	EGP10901;EGP27962;EGP08658;EGP21392;EGP16394;novel.1115;EGP23939;EGP06555;EGP00220;EGP01207;EGP23428;EGP28106	EGP27962;EGP08658;EGP21392;novel.1115;EGP23939;EGP06555;EGP00220;EGP01207;EGP23428;EGP28106	10	EGP10901;EGP16394	2
Biological process	GO:0048646	anatomical structure formation involved in morphogenesis	25/1312	0.147309	25	EGP16692;EGP19061;EGP09649;EGP22028;EGP31343;EGP15681;EGP25207;EGP13046;EGP15937;EGP15977;EGP02801;EGP17155;EGP13537;EGP12517;EGP13201;EGP29761;EGP30796;EGP06431;EGP20726;EGP19751;EGP16620;EGP24496;EGP09638;EGP19885;EGP09666	EGP16692;EGP19061;EGP09649;EGP22028;EGP31343;EGP15681;EGP25207;EGP15937;EGP15977;EGP17155;EGP13537;EGP29761;EGP06431;EGP20726;EGP09638	15	EGP13046;EGP02801;EGP12517;EGP13201;EGP30796;EGP19751;EGP16620;EGP24496;EGP19885;EGP09666	10
Biological process	GO:0002239	response to oomycetes	12/1312	0.151941	12	EGP22202;novel.1254;EGP21666;EGP00626;EGP02432;novel.1630;EGP29761;EGP19099;EGP18158;EGP32309;EGP13526;EGP32311	EGP22202;novel.1254;EGP21666;EGP00626;EGP29761;EGP32309;EGP13526	7	EGP02432;novel.1630;EGP19099;EGP18158;EGP32311	5
Biological process	GO:0009410	response to xenobiotic stimulus	3/1312	0.152563	3	EGP26892;EGP26887;EGP15686	EGP26887	1	EGP26892;EGP15686	2
Biological process	GO:0043086	negative regulation of catalytic activity	7/1312	0.153642	7	EGP07290;EGP18709;EGP12517;EGP22353;EGP13603;EGP28526;EGP28539	EGP07290;EGP18709;EGP13603;EGP28526;EGP28539	5	EGP12517;EGP22353	2
Biological process	GO:0090333	regulation of stomatal closure	7/1312	0.153642	7	EGP21158;novel.2409;EGP10076;EGP05419;EGP19721;EGP29483;EGP31362	EGP21158;EGP05419;EGP19721;EGP29483	4	novel.2409;EGP10076;EGP31362	3
Biological process	GO:0009739	response to gibberellin	14/1312	0.156119	14	EGP07168;EGP12845;EGP15862;EGP10195;EGP00669;EGP11294;novel.1818;EGP09921;novel.881;EGP31068;EGP11523;EGP14254;EGP17750;EGP10824	EGP07168;EGP12845;EGP10195;EGP00669;novel.1818;EGP09921;EGP31068;EGP10824	8	EGP15862;EGP11294;novel.881;EGP11523;EGP14254;EGP17750	6
Biological process	GO:0010143	cutin biosynthetic process	5/1312	0.156186	5	EGP08904;EGP23937;EGP11170;EGP13860;EGP00784	--	0	EGP08904;EGP23937;EGP11170;EGP13860;EGP00784	5
Biological process	GO:0045492	xylan biosynthetic process	5/1312	0.156186	5	EGP31337;EGP06299;EGP28574;EGP28487;EGP31455	EGP31337;EGP06299;EGP28574;EGP28487;EGP31455	5	--	0
Biological process	GO:0048581	negative regulation of post-embryonic development	12/1312	0.158065	12	EGP30387;EGP15862;EGP29927;EGP30362;EGP25915;EGP13201;EGP13860;novel.2165;EGP14515;EGP08799;EGP21903;novel.460	EGP30387;EGP29927;EGP30362;novel.2165;EGP08799;EGP21903;novel.460	7	EGP15862;EGP25915;EGP13201;EGP13860;EGP14515	5
Biological process	GO:0006595	polyamine metabolic process	4/1312	0.158192	4	EGP01191;EGP12760;EGP04413;EGP33631	EGP01191;EGP12760;EGP04413	3	EGP33631	1
Biological process	GO:0042168	heme metabolic process	4/1312	0.158192	4	EGP26723;EGP15862;EGP30343;EGP33822	EGP26723;EGP30343;EGP33822	3	EGP15862	1
Biological process	GO:0043666	regulation of phosphoprotein phosphatase activity	4/1312	0.158192	4	EGP17805;EGP16278;EGP18709;EGP16279	EGP16278;EGP18709;EGP16279	3	EGP17805	1
Biological process	GO:0015706	nitrate transport	6/1312	0.160984	6	EGP27346;EGP04891;EGP21127;EGP22509;EGP33166;novel.1702	EGP21127;EGP22509;EGP33166;novel.1702	4	EGP27346;EGP04891	2
Biological process	GO:2000031	regulation of salicylic acid mediated signaling pathway	6/1312	0.160984	6	EGP22202;EGP00626;EGP02938;EGP26552;EGP32309;EGP32311	EGP22202;EGP00626;EGP02938;EGP26552;EGP32309	5	EGP32311	1
Biological process	GO:2001057	reactive nitrogen species metabolic process	6/1312	0.160984	6	EGP15510;EGP23820;EGP27612;EGP22509;EGP06370;EGP10470	EGP15510;EGP22509;EGP06370;EGP10470	4	EGP23820;EGP27612	2
Biological process	GO:0009788	negative regulation of abscisic acid-activated signaling pathway	7/1312	0.162448	7	EGP07371;EGP00626;EGP14377;EGP31804;EGP14254;EGP02465;EGP17750	EGP07371;EGP00626	2	EGP14377;EGP31804;EGP14254;EGP02465;EGP17750	5
Biological process	GO:1901420	negative regulation of response to alcohol	7/1312	0.162448	7	EGP07371;EGP00626;EGP14377;EGP31804;EGP14254;EGP02465;EGP17750	EGP07371;EGP00626	2	EGP14377;EGP31804;EGP14254;EGP02465;EGP17750	5
Biological process	GO:1905958	negative regulation of cellular response to alcohol	7/1312	0.162448	7	EGP07371;EGP00626;EGP14377;EGP31804;EGP14254;EGP02465;EGP17750	EGP07371;EGP00626	2	EGP14377;EGP31804;EGP14254;EGP02465;EGP17750	5
Biological process	GO:0031349	positive regulation of defense response	15/1312	0.162779	15	novel.646;EGP25999;EGP04515;EGP12857;novel.775;novel.993;EGP29761;EGP26278;EGP32309;EGP32367;EGP32311;EGP20781;EGP31080;EGP18457;novel.469	novel.646;EGP25999;EGP12857;novel.775;novel.993;EGP29761;EGP26278;EGP32309;EGP20781;EGP18457;novel.469	11	EGP04515;EGP32367;EGP32311;EGP31080	4
Biological process	GO:0051241	negative regulation of multicellular organismal process	13/1312	0.166211	13	EGP30387;EGP00854;EGP15862;EGP29927;EGP30362;EGP25915;EGP13201;EGP13860;novel.2165;EGP14515;EGP08799;EGP21903;novel.460	EGP30387;EGP00854;EGP29927;EGP30362;novel.2165;EGP08799;EGP21903;novel.460	8	EGP15862;EGP25915;EGP13201;EGP13860;EGP14515	5
Biological process	GO:0048437	floral organ development	21/1312	0.16698	21	EGP16692;EGP06308;EGP31343;EGP13046;EGP15937;EGP16353;EGP13537;EGP02631;EGP02878;EGP14253;EGP32116;EGP02877;EGP24145;EGP21352;EGP33662;EGP30584;EGP19885;EGP27167;EGP09875;EGP30679;EGP09666	EGP16692;EGP31343;EGP15937;EGP16353;EGP13537;EGP02878;EGP14253;EGP02877;EGP24145;EGP33662;EGP30584;EGP27167;EGP09875	13	EGP06308;EGP13046;EGP02631;EGP32116;EGP21352;EGP19885;EGP30679;EGP09666	8
Biological process	GO:0006302	double-strand break repair	14/1312	0.167498	14	EGP32101;EGP04675;EGP10090;EGP20739;EGP30715;EGP33648;EGP02878;novel.775;EGP02877;novel.1855;EGP15437;EGP18669;EGP20291;EGP15680	EGP32101;EGP04675;EGP10090;EGP33648;EGP02878;novel.775;EGP02877;novel.1855;EGP18669;EGP15680	10	EGP20739;EGP30715;EGP15437;EGP20291	4
Biological process	GO:0010118	stomatal movement	19/1312	0.168252	19	EGP21158;EGP13655;EGP05394;EGP08919;novel.2409;EGP05833;EGP14277;EGP13540;EGP10076;EGP10470;EGP05419;EGP00176;EGP33363;EGP19721;EGP29483;EGP00889;EGP33822;EGP18890;EGP31362	EGP21158;EGP13655;EGP05394;EGP05833;EGP14277;EGP13540;EGP10470;EGP05419;EGP33363;EGP19721;EGP29483;EGP33822	12	EGP08919;novel.2409;EGP10076;EGP00176;EGP00889;EGP18890;EGP31362	7
Biological process	GO:0071407	cellular response to organic cyclic compound	19/1312	0.168252	19	EGP26007;EGP26720;EGP30564;EGP00667;EGP22202;EGP00626;EGP15977;EGP02938;EGP16572;EGP06424;novel.1818;EGP16620;EGP12678;EGP00531;EGP14716;EGP26552;EGP32309;EGP32311;EGP09678	EGP26007;EGP26720;EGP22202;EGP00626;EGP15977;EGP02938;EGP16572;novel.1818;EGP12678;EGP00531;EGP14716;EGP26552;EGP32309;EGP09678	14	EGP30564;EGP00667;EGP06424;EGP16620;EGP32311	5
Biological process	GO:0009862	systemic acquired resistance, salicylic acid mediated signaling pathway	3/1312	0.169496	3	EGP06424;EGP14716;EGP09678	EGP14716;EGP09678	2	EGP06424	1
Biological process	GO:0052482	defense response by cell wall thickening	3/1312	0.169496	3	EGP16108;novel.2410;EGP16106	novel.2410	1	EGP16108;EGP16106	2
Biological process	GO:0052544	defense response by callose deposition in cell wall	3/1312	0.169496	3	EGP16108;novel.2410;EGP16106	novel.2410	1	EGP16108;EGP16106	2
Biological process	GO:0001933	negative regulation of protein phosphorylation	2/1312	0.170305	2	EGP13379;EGP12517	EGP13379	1	EGP12517	1
Biological process	GO:0006213	pyrimidine nucleoside metabolic process	2/1312	0.170305	2	EGP21563;EGP23939	EGP21563;EGP23939	2	--	0
Biological process	GO:0006805	xenobiotic metabolic process	2/1312	0.170305	2	EGP26892;EGP26887	EGP26887	1	EGP26892	1
Biological process	GO:0010158	abaxial cell fate specification	2/1312	0.170305	2	EGP13450;EGP32219	EGP13450;EGP32219	2	--	0
Biological process	GO:0010972	negative regulation of G2/M transition of mitotic cell cycle	2/1312	0.170305	2	EGP10090;EGP30715	EGP10090	1	EGP30715	1
Biological process	GO:0015800	acidic amino acid transport	2/1312	0.170305	2	EGP09449;EGP15134	EGP09449	1	EGP15134	1
Biological process	GO:0018126	protein hydroxylation	2/1312	0.170305	2	EGP28764;EGP31655	EGP28764;EGP31655	2	--	0
Biological process	GO:0018401	peptidyl-proline hydroxylation to 4-hydroxy-L-proline	2/1312	0.170305	2	EGP28764;EGP31655	EGP28764;EGP31655	2	--	0
Biological process	GO:0019511	peptidyl-proline hydroxylation	2/1312	0.170305	2	EGP28764;EGP31655	EGP28764;EGP31655	2	--	0
Biological process	GO:0044818	mitotic G2/M transition checkpoint	2/1312	0.170305	2	EGP10090;EGP30715	EGP10090	1	EGP30715	1
Biological process	GO:0071466	cellular response to xenobiotic stimulus	2/1312	0.170305	2	EGP26892;EGP26887	EGP26887	1	EGP26892	1
Biological process	GO:1901804	beta-glucoside metabolic process	2/1312	0.170305	2	EGP28165;EGP31178	EGP28165;EGP31178	2	--	0
Biological process	GO:1901957	regulation of cutin biosynthetic process	2/1312	0.170305	2	EGP13860;EGP00784	--	0	EGP13860;EGP00784	2
Biological process	GO:1902750	negative regulation of cell cycle G2/M phase transition	2/1312	0.170305	2	EGP10090;EGP30715	EGP10090	1	EGP30715	1
Biological process	GO:0006787	porphyrin-containing compound catabolic process	4/1312	0.171677	4	EGP01597;EGP16486;EGP18900;EGP33822	EGP16486;EGP33822	2	EGP01597;EGP18900	2
Biological process	GO:0033015	tetrapyrrole catabolic process	4/1312	0.171677	4	EGP01597;EGP16486;EGP18900;EGP33822	EGP16486;EGP33822	2	EGP01597;EGP18900	2
Biological process	GO:0010648	negative regulation of cell communication	13/1312	0.178507	13	EGP28230;EGP13932;EGP07371;EGP21398;EGP00854;EGP00626;EGP09831;EGP14377;EGP31804;EGP14515;EGP14254;EGP02465;EGP17750	EGP28230;EGP13932;EGP07371;EGP21398;EGP00854;EGP00626	6	EGP09831;EGP14377;EGP31804;EGP14515;EGP14254;EGP02465;EGP17750	7
Biological process	GO:0023057	negative regulation of signaling	13/1312	0.178507	13	EGP28230;EGP13932;EGP07371;EGP21398;EGP00854;EGP00626;EGP09831;EGP14377;EGP31804;EGP14515;EGP14254;EGP02465;EGP17750	EGP28230;EGP13932;EGP07371;EGP21398;EGP00854;EGP00626	6	EGP09831;EGP14377;EGP31804;EGP14515;EGP14254;EGP02465;EGP17750	7
Biological process	GO:0044106	cellular amine metabolic process	8/1312	0.178629	8	EGP01191;EGP16108;EGP12760;novel.2410;EGP04413;EGP33631;EGP27512;EGP16106	EGP01191;EGP12760;novel.2410;EGP04413;EGP27512	5	EGP16108;EGP33631;EGP16106	3
Biological process	GO:0006081	cellular aldehyde metabolic process	7/1312	0.180713	7	EGP10670;EGP28179;EGP14516;EGP28165;EGP13615;EGP28180;EGP31178	EGP10670;EGP28179;EGP14516;EGP28165;EGP13615;EGP31178	6	EGP28180	1
Biological process	GO:0006458	'de novo' protein folding	7/1312	0.180713	7	EGP09440;EGP32427;EGP13276;EGP28036;EGP09622;EGP13366;novel.929	EGP09440;EGP32427;EGP13276;EGP28036;EGP09622;EGP13366	6	novel.929	1
Biological process	GO:0010102	lateral root morphogenesis	7/1312	0.180713	7	EGP16692;EGP19061;EGP15937;EGP12517;EGP30796;EGP06431;EGP33662	EGP16692;EGP19061;EGP15937;EGP06431;EGP33662	5	EGP12517;EGP30796	2
Biological process	GO:0046364	monosaccharide biosynthetic process	6/1312	0.181269	6	EGP13468;EGP25953;EGP19572;EGP07193;EGP07192;EGP28107	EGP13468;EGP25953;EGP07193;EGP07192;EGP28107	5	EGP19572	1
Biological process	GO:0009664	plant-type cell wall organization	18/1312	0.18398	18	EGP27894;EGP28160;EGP10096;EGP22028;EGP25999;EGP05097;EGP15681;EGP21392;EGP06773;EGP28758;EGP11626;EGP04116;EGP06555;EGP00220;EGP20060;EGP21950;EGP13890;EGP19523	EGP27894;EGP28160;EGP10096;EGP22028;EGP25999;EGP05097;EGP15681;EGP21392;EGP06773;EGP28758;EGP06555;EGP00220;EGP20060;EGP19523	14	EGP11626;EGP04116;EGP21950;EGP13890	4
Biological process	GO:0048528	post-embryonic root development	13/1312	0.184817	13	EGP16692;EGP19061;EGP28524;EGP15937;EGP13537;EGP12517;EGP30796;EGP06431;EGP33662;EGP14515;EGP08799;EGP09666;EGP04311	EGP16692;EGP19061;EGP15937;EGP13537;EGP06431;EGP33662;EGP08799;EGP04311	8	EGP28524;EGP12517;EGP30796;EGP14515;EGP09666	5
Biological process	GO:0010099	regulation of photomorphogenesis	4/1312	0.185543	4	EGP15862;EGP33390;EGP20185;EGP09489	EGP33390	1	EGP15862;EGP20185;EGP09489	3
Biological process	GO:0031400	negative regulation of protein modification process	4/1312	0.185543	4	EGP13379;EGP18709;EGP12517;EGP20291	EGP13379;EGP18709	2	EGP12517;EGP20291	2
Biological process	GO:0046271	phenylpropanoid catabolic process	4/1312	0.185543	4	EGP24248;EGP31025;EGP13251;EGP18016	--	0	EGP24248;EGP31025;EGP13251;EGP18016	4
Biological process	GO:0051346	negative regulation of hydrolase activity	4/1312	0.185543	4	EGP18709;EGP13603;EGP28526;EGP28539	EGP18709;EGP13603;EGP28526;EGP28539	4	--	0
Biological process	GO:0051701	biological process involved in interaction with host	4/1312	0.185543	4	EGP19307;EGP02699;EGP16285;EGP19302	EGP19307;EGP02699;EGP16285;EGP19302	4	--	0
Biological process	GO:0006470	protein dephosphorylation	10/1312	0.186902	10	EGP17805;EGP20657;EGP16278;EGP18709;EGP18281;EGP04165;novel.1419;EGP18195;EGP16279;EGP22405	EGP16278;EGP18709;EGP18281;EGP18195;EGP16279;EGP22405	6	EGP17805;EGP20657;EGP04165;novel.1419	4
Biological process	GO:0009640	photomorphogenesis	10/1312	0.186902	10	EGP31283;EGP00995;EGP15862;EGP13537;EGP28691;EGP33390;EGP20185;EGP19885;EGP09489;EGP09666	EGP31283;EGP00995;EGP13537;EGP28691;EGP33390	5	EGP15862;EGP20185;EGP19885;EGP09489;EGP09666	5
Biological process	GO:0062014	negative regulation of small molecule metabolic process	3/1312	0.186935	3	EGP09921;EGP27512;EGP20291	EGP09921;EGP27512	2	EGP20291	1
Biological process	GO:0098661	inorganic anion transmembrane transport	3/1312	0.186935	3	EGP09730;EGP24154;EGP07512	EGP09730;EGP24154	2	EGP07512	1
Biological process	GO:0046686	response to cadmium ion	19/1312	0.18818	19	EGP09440;EGP25953;EGP07130;EGP28511;EGP28509;EGP28121;EGP26723;EGP16631;EGP33185;EGP09863;EGP14970;EGP02960;EGP18102;EGP10384;novel.1630;EGP18133;EGP31114;EGP21300;EGP15680	EGP09440;EGP25953;EGP07130;EGP26723;EGP16631;EGP33185;EGP09863;EGP14970;EGP02960;EGP18102;EGP18133;EGP31114;EGP21300;EGP15680	14	EGP28511;EGP28509;EGP28121;EGP10384;novel.1630	5
Biological process	GO:0098771	inorganic ion homeostasis	22/1312	0.188978	22	EGP11410;EGP27346;EGP21158;EGP06737;EGP07130;EGP18914;EGP04891;EGP23800;EGP06058;EGP08971;EGP24990;EGP14970;novel.1002;EGP30372;novel.1053;EGP31143;EGP33545;EGP20714;EGP21127;EGP09921;EGP15718;EGP00513	EGP21158;EGP07130;EGP18914;EGP06058;EGP08971;EGP24990;EGP14970;EGP31143;EGP33545;EGP21127;EGP09921;EGP15718	12	EGP11410;EGP27346;EGP06737;EGP04891;EGP23800;novel.1002;EGP30372;novel.1053;EGP20714;EGP00513	10
Biological process	GO:0055076	transition metal ion homeostasis	11/1312	0.189122	11	EGP21158;EGP07130;EGP18914;EGP06058;EGP08971;EGP14970;novel.1002;EGP31143;EGP20714;EGP15718;EGP00513	EGP21158;EGP07130;EGP18914;EGP06058;EGP08971;EGP14970;EGP31143;EGP15718	8	novel.1002;EGP20714;EGP00513	3
Biological process	GO:0010101	post-embryonic root morphogenesis	7/1312	0.190155	7	EGP16692;EGP19061;EGP15937;EGP12517;EGP30796;EGP06431;EGP33662	EGP16692;EGP19061;EGP15937;EGP06431;EGP33662	5	EGP12517;EGP30796	2
Biological process	GO:1905039	carboxylic acid transmembrane transport	7/1312	0.190155	7	EGP02699;EGP31485;EGP09449;EGP13540;EGP24154;EGP15134;EGP33363	EGP02699;EGP31485;EGP09449;EGP13540;EGP24154;EGP33363	6	EGP15134	1
Biological process	GO:0010087	phloem or xylem histogenesis	12/1312	0.190498	12	EGP14030;EGP24002;EGP05833;EGP03181;EGP16488;EGP13221;novel.1815;EGP20060;EGP11940;EGP23701;EGP28433;EGP22548	EGP14030;EGP24002;EGP05833;EGP03181;EGP16488;EGP13221;EGP20060;EGP11940;EGP22548	9	novel.1815;EGP23701;EGP28433	3
Biological process	GO:0045930	negative regulation of mitotic cell cycle	5/1312	0.191006	5	novel.2248;EGP10090;EGP13377;EGP30715;EGP20714	novel.2248;EGP10090	2	EGP13377;EGP30715;EGP20714	3
Biological process	GO:0051273	beta-glucan metabolic process	13/1312	0.191232	13	EGP10901;EGP27962;EGP08658;EGP21392;EGP16394;novel.1115;EGP06995;EGP23939;EGP06555;EGP00220;EGP01207;EGP23428;EGP28106	EGP27962;EGP08658;EGP21392;novel.1115;EGP06995;EGP23939;EGP06555;EGP00220;EGP01207;EGP23428;EGP28106	11	EGP10901;EGP16394	2
Biological process	GO:0003002	regionalization	18/1312	0.194587	18	EGP28574;EGP31343;EGP10512;EGP00854;EGP13046;EGP16488;EGP13221;EGP02878;EGP14253;EGP20714;EGP02877;EGP20751;EGP24145;EGP10181;EGP20060;EGP31455;EGP33452;EGP00784	EGP28574;EGP31343;EGP10512;EGP00854;EGP16488;EGP13221;EGP02878;EGP14253;EGP02877;EGP24145;EGP10181;EGP20060;EGP31455	13	EGP13046;EGP20714;EGP20751;EGP33452;EGP00784	5
Biological process	GO:0009065	glutamine family amino acid catabolic process	2/1312	0.195589	2	EGP31475;EGP02960	EGP02960	1	EGP31475	1
Biological process	GO:0015846	polyamine transport	2/1312	0.195589	2	EGP06631;EGP21651	EGP21651	1	EGP06631	1
Biological process	GO:0034204	lipid translocation	2/1312	0.195589	2	EGP05443;EGP22231	--	0	EGP05443;EGP22231	2
Biological process	GO:0045332	phospholipid translocation	2/1312	0.195589	2	EGP05443;EGP22231	--	0	EGP05443;EGP22231	2
Biological process	GO:0072337	modified amino acid transport	2/1312	0.195589	2	novel.1630;EGP31781	--	0	novel.1630;EGP31781	2
Biological process	GO:1902475	L-alpha-amino acid transmembrane transport	2/1312	0.195589	2	EGP09449;EGP15134	EGP09449	1	EGP15134	1
Biological process	GO:0010017	red or far-red light signaling pathway	8/1312	0.195991	8	EGP00995;EGP19061;EGP15862;EGP21891;novel.2235;EGP21908;EGP20185;EGP26512	EGP00995;EGP19061;EGP21891;EGP21908;EGP26512	5	EGP15862;novel.2235;EGP20185	3
Biological process	GO:0071489	cellular response to red or far red light	8/1312	0.195991	8	EGP00995;EGP19061;EGP15862;EGP21891;novel.2235;EGP21908;EGP20185;EGP26512	EGP00995;EGP19061;EGP21891;EGP21908;EGP26512	5	EGP15862;novel.2235;EGP20185	3
Biological process	GO:0031347	regulation of defense response	35/1312	0.198484	35	EGP21277;novel.646;EGP10406;EGP25999;EGP31706;EGP04515;EGP22202;EGP12857;EGP00626;EGP10195;EGP21890;novel.775;novel.993;EGP22444;EGP29761;EGP27814;EGP26278;EGP07261;EGP11285;EGP32309;EGP09657;EGP32367;EGP11081;EGP32311;EGP20781;novel.2165;EGP31080;EGP21008;EGP18717;EGP18457;novel.469;novel.460;EGP16389;EGP20561;EGP06847	novel.646;EGP10406;EGP25999;EGP22202;EGP12857;EGP00626;EGP10195;EGP21890;novel.775;novel.993;EGP22444;EGP29761;EGP27814;EGP26278;EGP07261;EGP32309;EGP20781;novel.2165;EGP18457;novel.469;novel.460;EGP16389	22	EGP21277;EGP31706;EGP04515;EGP11285;EGP09657;EGP32367;EGP11081;EGP32311;EGP31080;EGP21008;EGP18717;EGP20561;EGP06847	13
Biological process	GO:0046174	polyol catabolic process	4/1312	0.199756	4	EGP19170;EGP07193;EGP07192;EGP12460	EGP07193;EGP07192	2	EGP19170;EGP12460	2
Biological process	GO:0034440	lipid oxidation	7/1312	0.199791	7	EGP09644;EGP33690;EGP18943;EGP12316;EGP05633;EGP15709;EGP20723	EGP33690;EGP18943;EGP05633;EGP15709;EGP20723	5	EGP09644;EGP12316	2
Biological process	GO:0061077	chaperone-mediated protein folding	9/1312	0.199804	9	EGP09440;EGP32427;EGP13276;EGP28036;EGP13100;EGP09622;EGP13366;novel.929;EGP33825	EGP09440;EGP32427;EGP13276;EGP28036;EGP13100;EGP09622;EGP13366;EGP33825	8	novel.929	1
Biological process	GO:0033692	cellular polysaccharide biosynthetic process	20/1312	0.202155	20	EGP31337;EGP10901;EGP28160;EGP00919;EGP06299;EGP27962;EGP28574;EGP08658;EGP11314;EGP21392;EGP16394;novel.1115;EGP23939;EGP28487;EGP06555;EGP00220;EGP01207;EGP31455;EGP23428;EGP28106	EGP31337;EGP28160;EGP00919;EGP06299;EGP27962;EGP28574;EGP08658;EGP21392;novel.1115;EGP23939;EGP28487;EGP06555;EGP00220;EGP01207;EGP31455;EGP23428;EGP28106	17	EGP10901;EGP11314;EGP16394	3
Biological process	GO:0000724	double-strand break repair via homologous recombination	11/1312	0.203614	11	EGP04675;EGP10090;EGP20739;EGP30715;EGP02878;novel.775;EGP02877;novel.1855;EGP15437;EGP20291;EGP15680	EGP04675;EGP10090;EGP02878;novel.775;EGP02877;novel.1855;EGP15680	7	EGP20739;EGP30715;EGP15437;EGP20291	4
Biological process	GO:0006188	IMP biosynthetic process	3/1312	0.20481	3	EGP19038;EGP04894;novel.1884	EGP19038;EGP04894	2	novel.1884	1
Biological process	GO:0007155	cell adhesion	3/1312	0.20481	3	EGP28230;EGP28160;EGP20060	EGP28230;EGP28160;EGP20060	3	--	0
Biological process	GO:0009074	aromatic amino acid family catabolic process	3/1312	0.20481	3	EGP24622;EGP00684;novel.2017	EGP24622;EGP00684	2	novel.2017	1
Biological process	GO:0022610	biological adhesion	3/1312	0.20481	3	EGP28230;EGP28160;EGP20060	EGP28230;EGP28160;EGP20060	3	--	0
Biological process	GO:0032409	regulation of transporter activity	3/1312	0.20481	3	EGP00884;EGP12788;EGP30737	EGP12788;EGP30737	2	EGP00884	1
Biological process	GO:0043434	response to peptide hormone	3/1312	0.20481	3	EGP21830;EGP18485;EGP21716	EGP21830;EGP18485;EGP21716	3	--	0
Biological process	GO:1900367	positive regulation of defense response to insect	3/1312	0.20481	3	EGP25999;EGP20781;EGP31080	EGP25999;EGP20781	2	EGP31080	1
Biological process	GO:0005984	disaccharide metabolic process	8/1312	0.204923	8	EGP10096;EGP28121;EGP11386;EGP01163;EGP32103;EGP13890;EGP19523;EGP04011	EGP10096;EGP32103;EGP19523	3	EGP28121;EGP11386;EGP01163;EGP13890;EGP04011	5
Biological process	GO:0006633	fatty acid biosynthetic process	18/1312	0.205484	18	EGP12462;EGP25884;EGP09644;EGP26804;EGP12316;EGP05633;EGP25937;EGP26805;EGP20723;EGP24324;EGP08435;EGP13860;EGP25668;EGP31080;EGP26802;EGP28561;EGP20291;EGP19689	EGP12462;EGP25884;EGP26804;EGP05633;EGP25937;EGP26805;EGP20723;EGP08435;EGP25668;EGP26802;EGP19689	11	EGP09644;EGP12316;EGP24324;EGP13860;EGP31080;EGP28561;EGP20291	7
Biological process	GO:0045491	xylan metabolic process	9/1312	0.208151	9	EGP31337;EGP06071;EGP06299;EGP32972;EGP28574;EGP05448;EGP28487;EGP21950;EGP31455	EGP31337;EGP06071;EGP06299;EGP28574;EGP05448;EGP28487;EGP31455	7	EGP32972;EGP21950	2
Biological process	GO:0051606	detection of stimulus	10/1312	0.210063	10	EGP31632;EGP00995;EGP19061;EGP29841;novel.2409;EGP10481;EGP21891;novel.2235;EGP21908;EGP20185	EGP31632;EGP00995;EGP19061;EGP29841;EGP10481;EGP21891;EGP21908	7	novel.2409;novel.2235;EGP20185	3
Biological process	GO:0006275	regulation of DNA replication	6/1312	0.213449	6	novel.2248;EGP13377;novel.1650;EGP12517;EGP02878;EGP02877	novel.2248;novel.1650;EGP02878;EGP02877	4	EGP13377;EGP12517	2
Biological process	GO:0006638	neutral lipid metabolic process	6/1312	0.213449	6	EGP06308;EGP30387;EGP29927;EGP30362;EGP21903;EGP31009	EGP30387;EGP29927;EGP30362;EGP21903;EGP31009	5	EGP06308	1
Biological process	GO:0006639	acylglycerol metabolic process	6/1312	0.213449	6	EGP06308;EGP30387;EGP29927;EGP30362;EGP21903;EGP31009	EGP30387;EGP29927;EGP30362;EGP21903;EGP31009	5	EGP06308	1
Biological process	GO:0009072	aromatic amino acid family metabolic process	9/1312	0.216636	9	EGP24622;EGP16108;EGP04332;EGP00684;novel.2017;EGP06849;novel.2410;EGP09347;EGP16106	EGP24622;EGP04332;EGP00684;EGP06849;novel.2410;EGP09347	6	EGP16108;novel.2017;EGP16106	3
Biological process	GO:0046395	carboxylic acid catabolic process	14/1312	0.216957	14	EGP24622;EGP31475;EGP33690;EGP00684;EGP02960;EGP28478;novel.2017;EGP08711;EGP20936;EGP09532;EGP13526;EGP18457;EGP21129;EGP19389	EGP24622;EGP33690;EGP00684;EGP02960;EGP28478;EGP08711;EGP09532;EGP13526;EGP18457;EGP21129	10	EGP31475;novel.2017;EGP20936;EGP19389	4
Biological process	GO:0010015	root morphogenesis	29/1312	0.218322	29	EGP16692;EGP19061;EGP05097;EGP00309;EGP00854;EGP15937;EGP13443;EGP12517;EGP25835;EGP24326;EGP10076;EGP00017;EGP21830;EGP30796;EGP06431;EGP21306;EGP09921;EGP09200;EGP08909;EGP33662;EGP27880;EGP19721;EGP03250;EGP14515;EGP11523;EGP22548;novel.1173;EGP20291;EGP31362	EGP16692;EGP19061;EGP05097;EGP00854;EGP15937;EGP13443;EGP25835;EGP00017;EGP21830;EGP06431;EGP21306;EGP09921;EGP09200;EGP08909;EGP33662;EGP27880;EGP19721;EGP03250;EGP22548	19	EGP00309;EGP12517;EGP24326;EGP10076;EGP30796;EGP14515;EGP11523;novel.1173;EGP20291;EGP31362	10
Biological process	GO:1903825	organic acid transmembrane transport	7/1312	0.21961	7	EGP02699;EGP31485;EGP09449;EGP13540;EGP24154;EGP15134;EGP33363	EGP02699;EGP31485;EGP09449;EGP13540;EGP24154;EGP33363	6	EGP15134	1
Biological process	GO:0006777	Mo-molybdopterin cofactor biosynthetic process	2/1312	0.22129	2	EGP30744;EGP18890	EGP30744	1	EGP18890	1
Biological process	GO:0006782	protoporphyrinogen IX biosynthetic process	2/1312	0.22129	2	EGP26723;EGP30343	EGP26723;EGP30343	2	--	0
Biological process	GO:0008216	spermidine metabolic process	2/1312	0.22129	2	EGP01191;EGP04413	EGP01191;EGP04413	2	--	0
Biological process	GO:0009068	aspartate family amino acid catabolic process	2/1312	0.22129	2	EGP09532;EGP18457	EGP09532;EGP18457	2	--	0
Biological process	GO:0009094	L-phenylalanine biosynthetic process	2/1312	0.22129	2	EGP06849;EGP09347	EGP06849;EGP09347	2	--	0
Biological process	GO:0009963	positive regulation of flavonoid biosynthetic process	2/1312	0.22129	2	EGP21874;EGP16978	EGP21874;EGP16978	2	--	0
Biological process	GO:0010496	intercellular transport	2/1312	0.22129	2	EGP16285;EGP13201	EGP16285	1	EGP13201	1
Biological process	GO:0015766	disaccharide transport	2/1312	0.22129	2	novel.1789;EGP10851	--	0	novel.1789;EGP10851	2
Biological process	GO:0015770	sucrose transport	2/1312	0.22129	2	novel.1789;EGP10851	--	0	novel.1789;EGP10851	2
Biological process	GO:0015772	oligosaccharide transport	2/1312	0.22129	2	novel.1789;EGP10851	--	0	novel.1789;EGP10851	2
Biological process	GO:0015914	phospholipid transport	2/1312	0.22129	2	EGP05443;EGP22231	--	0	EGP05443;EGP22231	2
Biological process	GO:0019720	Mo-molybdopterin cofactor metabolic process	2/1312	0.22129	2	EGP30744;EGP18890	EGP30744	1	EGP18890	1
Biological process	GO:0042326	negative regulation of phosphorylation	2/1312	0.22129	2	EGP13379;EGP12517	EGP13379	1	EGP12517	1
Biological process	GO:0043545	molybdopterin cofactor metabolic process	2/1312	0.22129	2	EGP30744;EGP18890	EGP30744	1	EGP18890	1
Biological process	GO:0044774	mitotic DNA integrity checkpoint	2/1312	0.22129	2	EGP10090;EGP30715	EGP10090	1	EGP30715	1
Biological process	GO:0046501	protoporphyrinogen IX metabolic process	2/1312	0.22129	2	EGP26723;EGP30343	EGP26723;EGP30343	2	--	0
Biological process	GO:0051189	prosthetic group metabolic process	2/1312	0.22129	2	EGP30744;EGP18890	EGP30744	1	EGP18890	1
Biological process	GO:0070370	cellular heat acclimation	2/1312	0.22129	2	EGP13100;EGP20060	EGP13100;EGP20060	2	--	0
Biological process	GO:0080148	negative regulation of response to water deprivation	2/1312	0.22129	2	EGP26291;EGP16121	EGP26291	1	EGP16121	1
Biological process	GO:1902223	erythrose 4-phosphate/phosphoenolpyruvate family amino acid biosynthetic process	2/1312	0.22129	2	EGP06849;EGP09347	EGP06849;EGP09347	2	--	0
Biological process	GO:0048584	positive regulation of response to stimulus	29/1312	0.222686	29	EGP28453;novel.646;EGP28524;EGP25999;EGP04515;EGP12857;EGP14278;EGP08934;EGP06849;EGP00669;novel.775;novel.993;EGP08936;EGP29761;EGP15832;EGP26278;EGP00176;EGP32309;EGP32367;EGP29483;EGP00889;EGP32311;EGP20781;EGP31080;EGP18457;novel.469;EGP22548;EGP09347;EGP34110	novel.646;EGP25999;EGP12857;EGP14278;EGP06849;EGP00669;novel.775;novel.993;EGP08936;EGP29761;EGP26278;EGP32309;EGP29483;EGP20781;EGP18457;novel.469;EGP22548;EGP09347	18	EGP28453;EGP28524;EGP04515;EGP08934;EGP15832;EGP00176;EGP32367;EGP00889;EGP32311;EGP31080;EGP34110	11
Biological process	GO:0000919	cell plate assembly	3/1312	0.223053	3	EGP01400;EGP01402;EGP01401	EGP01400;EGP01402;EGP01401	3	--	0
Biological process	GO:0006098	pentose-phosphate shunt	3/1312	0.223053	3	EGP08711;EGP23939;EGP03220	EGP08711;EGP23939;EGP03220	3	--	0
Biological process	GO:0010212	response to ionizing radiation	3/1312	0.223053	3	EGP31754;EGP30715;EGP33648	EGP31754;EGP33648	2	EGP30715	1
Biological process	GO:0046040	IMP metabolic process	3/1312	0.223053	3	EGP19038;EGP04894;novel.1884	EGP19038;EGP04894	2	novel.1884	1
Biological process	GO:1901002	positive regulation of response to salt stress	3/1312	0.223053	3	EGP06849;EGP09347;EGP34110	EGP06849;EGP09347	2	EGP34110	1
Biological process	GO:0006767	water-soluble vitamin metabolic process	8/1312	0.223253	8	EGP13468;EGP17030;EGP19572;EGP07193;EGP07192;EGP01212;EGP33757;EGP20638	EGP13468;EGP07193;EGP07192	3	EGP17030;EGP19572;EGP01212;EGP33757;EGP20638	5
Biological process	GO:0009069	serine family amino acid metabolic process	6/1312	0.22459	6	EGP13233;EGP05229;EGP30646;EGP09532;EGP18457;EGP21129	EGP13233;EGP05229;EGP09532;EGP18457;EGP21129	5	EGP30646	1
Biological process	GO:0071470	cellular response to osmotic stress	5/1312	0.228259	5	EGP05703;EGP29663;EGP26198;EGP30372;EGP26196	EGP29663;EGP26198;EGP26196	3	EGP05703;EGP30372	2
Biological process	GO:0006457	protein folding	20/1312	0.228696	20	EGP09440;EGP11141;EGP14712;EGP32427;EGP30604;EGP13276;EGP05286;EGP28036;EGP13100;EGP30406;EGP09622;EGP09623;EGP33185;EGP05897;EGP30625;EGP13366;EGP10410;novel.929;EGP33440;EGP33825	EGP09440;EGP11141;EGP14712;EGP32427;EGP30604;EGP13276;EGP05286;EGP28036;EGP13100;EGP30406;EGP09622;EGP09623;EGP33185;EGP05897;EGP13366;EGP10410;EGP33440;EGP33825	18	EGP30625;novel.929	2
Biological process	GO:0009682	induced systemic resistance	4/1312	0.229084	4	EGP16108;novel.2410;EGP31080;EGP16106	novel.2410	1	EGP16108;EGP31080;EGP16106	3
Biological process	GO:0010083	regulation of vegetative meristem growth	4/1312	0.229084	4	EGP24326;EGP21306;EGP09200;EGP08909	EGP21306;EGP09200;EGP08909	3	EGP24326	1
Biological process	GO:0010448	vegetative meristem growth	4/1312	0.229084	4	EGP24326;EGP21306;EGP09200;EGP08909	EGP21306;EGP09200;EGP08909	3	EGP24326	1
Biological process	GO:0009627	systemic acquired resistance	8/1312	0.232637	8	EGP21277;EGP05393;EGP25931;EGP22202;EGP06424;EGP13798;EGP14716;EGP09678	EGP05393;EGP22202;EGP14716;EGP09678	4	EGP21277;EGP25931;EGP06424;EGP13798	4
Biological process	GO:0000725	recombinational repair	11/1312	0.233955	11	EGP04675;EGP10090;EGP20739;EGP30715;EGP02878;novel.775;EGP02877;novel.1855;EGP15437;EGP20291;EGP15680	EGP04675;EGP10090;EGP02878;novel.775;EGP02877;novel.1855;EGP15680	7	EGP20739;EGP30715;EGP15437;EGP20291	4
Biological process	GO:0002229	defense response to oomycetes	9/1312	0.233997	9	EGP22202;EGP21666;EGP00626;novel.1630;EGP29761;EGP18158;EGP32309;EGP13526;EGP32311	EGP22202;EGP21666;EGP00626;EGP29761;EGP32309;EGP13526	6	novel.1630;EGP18158;EGP32311	3
Biological process	GO:0098660	inorganic ion transmembrane transport	15/1312	0.234926	15	EGP27346;EGP14223;EGP09730;EGP05605;EGP04891;EGP24990;EGP30372;EGP21127;EGP19614;EGP24154;EGP15691;EGP07512;EGP19721;EGP30253;EGP30725	EGP09730;EGP24990;EGP21127;EGP19614;EGP24154;EGP15691;EGP19721	7	EGP27346;EGP14223;EGP05605;EGP04891;EGP30372;EGP07512;EGP30253;EGP30725	8
Biological process	GO:0010089	xylem development	6/1312	0.235916	6	EGP14030;EGP24002;EGP05833;EGP03181;novel.1815;EGP23701	EGP14030;EGP24002;EGP05833;EGP03181	4	novel.1815;EGP23701	2
Biological process	GO:0046889	positive regulation of lipid biosynthetic process	6/1312	0.235916	6	EGP07168;EGP30711;EGP13860;EGP10724;EGP22548;EGP26512	EGP07168;EGP22548;EGP26512	3	EGP30711;EGP13860;EGP10724	3
Biological process	GO:0062013	positive regulation of small molecule metabolic process	6/1312	0.235916	6	EGP07168;EGP30711;EGP13860;EGP10724;EGP22548;EGP26512	EGP07168;EGP22548;EGP26512	3	EGP30711;EGP13860;EGP10724	3
Biological process	GO:1902600	proton transmembrane transport	6/1312	0.235916	6	EGP27346;EGP14223;EGP04891;EGP24990;EGP21127;EGP24154	EGP24990;EGP21127;EGP24154	3	EGP27346;EGP14223;EGP04891	3
Biological process	GO:0042180	cellular ketone metabolic process	16/1312	0.239018	16	EGP13468;EGP07168;EGP28298;EGP30521;EGP31207;EGP10406;EGP30711;EGP25951;EGP09921;EGP13860;EGP19885;EGP10724;EGP27512;EGP22548;EGP26512;EGP20291	EGP13468;EGP07168;EGP28298;EGP31207;EGP10406;EGP25951;EGP09921;EGP27512;EGP22548;EGP26512	10	EGP30521;EGP30711;EGP13860;EGP19885;EGP10724;EGP20291	6
Biological process	GO:0006576	cellular biogenic amine metabolic process	7/1312	0.24009	7	EGP01191;EGP16108;EGP12760;novel.2410;EGP04413;EGP33631;EGP16106	EGP01191;EGP12760;novel.2410;EGP04413	4	EGP16108;EGP33631;EGP16106	3
Biological process	GO:0021700	developmental maturation	26/1312	0.241229	26	EGP26291;EGP16692;EGP05097;EGP00235;EGP00854;EGP15937;EGP11657;EGP13443;EGP11658;EGP21024;EGP29671;EGP25835;EGP16121;EGP31232;EGP00017;EGP20936;EGP00234;EGP31068;EGP05747;EGP10851;EGP19721;EGP14515;EGP11523;EGP09875;EGP19389;EGP00925	EGP26291;EGP16692;EGP05097;EGP00235;EGP00854;EGP15937;EGP13443;EGP29671;EGP25835;EGP31232;EGP00017;EGP00234;EGP31068;EGP19721;EGP09875	15	EGP11657;EGP11658;EGP21024;EGP16121;EGP20936;EGP05747;EGP10851;EGP14515;EGP11523;EGP19389;EGP00925	11
Biological process	GO:0006740	NADPH regeneration	3/1312	0.241596	3	EGP08711;EGP23939;EGP03220	EGP08711;EGP23939;EGP03220	3	--	0
Biological process	GO:0052543	callose deposition in cell wall	3/1312	0.241596	3	EGP16108;novel.2410;EGP16106	novel.2410	1	EGP16108;EGP16106	2
Biological process	GO:1900057	positive regulation of leaf senescence	3/1312	0.241596	3	novel.2203;EGP00176;EGP00889	--	0	novel.2203;EGP00176;EGP00889	3
Biological process	GO:0046434	organophosphate catabolic process	8/1312	0.242155	8	EGP05874;EGP09193;EGP19170;EGP13754;EGP03077;EGP03182;EGP29483;EGP12460	EGP09193;EGP13754;EGP03077;EGP03182;EGP29483	5	EGP05874;EGP19170;EGP12460	3
Biological process	GO:0006873	cellular ion homeostasis	14/1312	0.243815	14	EGP06737;EGP07130;EGP18914;EGP00884;EGP06058;EGP08971;EGP24990;EGP14970;EGP12788;novel.1002;EGP30372;EGP31143;EGP15718;EGP00513	EGP07130;EGP18914;EGP06058;EGP08971;EGP24990;EGP14970;EGP12788;EGP31143;EGP15718	9	EGP06737;EGP00884;novel.1002;EGP30372;EGP00513	5
Biological process	GO:0009956	radial pattern formation	4/1312	0.244132	4	EGP10512;EGP02878;EGP20714;EGP02877	EGP10512;EGP02878;EGP02877	3	EGP20714	1
Biological process	GO:0010921	regulation of phosphatase activity	4/1312	0.244132	4	EGP17805;EGP16278;EGP18709;EGP16279	EGP16278;EGP18709;EGP16279	3	EGP17805	1
Biological process	GO:1902288	regulation of defense response to oomycetes	4/1312	0.244132	4	EGP22202;EGP29761;EGP32309;EGP32311	EGP22202;EGP29761;EGP32309	3	EGP32311	1
Biological process	GO:0048507	meristem development	31/1312	0.247097	31	EGP25884;EGP28191;EGP18355;EGP31343;EGP00309;EGP10512;EGP13046;EGP02631;EGP00669;EGP24326;EGP20751;EGP25915;EGP10076;EGP31975;EGP21830;EGP21306;EGP09200;EGP08909;EGP33631;EGP28433;EGP27880;EGP19885;EGP03250;EGP33822;EGP11523;EGP04011;EGP30679;EGP22548;novel.1173;EGP20291;EGP31362	EGP25884;EGP28191;EGP18355;EGP31343;EGP10512;EGP00669;EGP21830;EGP21306;EGP09200;EGP08909;EGP27880;EGP03250;EGP33822;EGP22548	14	EGP00309;EGP13046;EGP02631;EGP24326;EGP20751;EGP25915;EGP10076;EGP31975;EGP33631;EGP28433;EGP19885;EGP11523;EGP04011;EGP30679;novel.1173;EGP20291;EGP31362	17
Biological process	GO:0000076	DNA replication checkpoint	2/1312	0.247233	2	EGP10090;novel.1650	EGP10090;novel.1650	2	--	0
Biological process	GO:0006880	intracellular sequestering of iron ion	2/1312	0.247233	2	EGP06058;EGP08971	EGP06058;EGP08971	2	--	0
Biological process	GO:0007292	female gamete generation	2/1312	0.247233	2	EGP13379;EGP17260	EGP13379;EGP17260	2	--	0
Biological process	GO:0009407	toxin catabolic process	2/1312	0.247233	2	EGP30699;EGP18102	EGP30699;EGP18102	2	--	0
Biological process	GO:0030026	cellular manganese ion homeostasis	2/1312	0.247233	2	EGP06058;EGP08971	EGP06058;EGP08971	2	--	0
Biological process	GO:0031540	regulation of anthocyanin biosynthetic process	2/1312	0.247233	2	EGP21874;EGP16978	EGP21874;EGP16978	2	--	0
Biological process	GO:0033356	UDP-L-arabinose metabolic process	2/1312	0.247233	2	EGP08658;EGP10319	EGP08658;EGP10319	2	--	0
Biological process	GO:0046184	aldehyde biosynthetic process	2/1312	0.247233	2	EGP28165;EGP31178	EGP28165;EGP31178	2	--	0
Biological process	GO:0051353	positive regulation of oxidoreductase activity	2/1312	0.247233	2	EGP08904;EGP23937	--	0	EGP08904;EGP23937	2
Biological process	GO:0097035	regulation of membrane lipid distribution	2/1312	0.247233	2	EGP05443;EGP22231	--	0	EGP05443;EGP22231	2
Biological process	GO:0097577	sequestering of iron ion	2/1312	0.247233	2	EGP06058;EGP08971	EGP06058;EGP08971	2	--	0
Biological process	GO:0016311	dephosphorylation	15/1312	0.248083	15	EGP13233;EGP19170;EGP17805;EGP02690;EGP20657;EGP16278;EGP18709;EGP18281;EGP04165;novel.1419;EGP18195;EGP18265;EGP16279;EGP22405;EGP12460	EGP13233;EGP02690;EGP16278;EGP18709;EGP18281;EGP18195;EGP16279;EGP22405	8	EGP19170;EGP17805;EGP20657;EGP04165;novel.1419;EGP18265;EGP12460	7
Biological process	GO:0009736	cytokinin-activated signaling pathway	8/1312	0.251801	8	novel.1548;EGP13932;EGP21398;EGP30078;EGP09831;EGP28373;EGP11523;EGP06227	EGP13932;EGP21398;EGP06227	3	novel.1548;EGP30078;EGP09831;EGP28373;EGP11523	5
Biological process	GO:0044070	regulation of anion transport	5/1312	0.254175	5	EGP00884;EGP02699;EGP30794;EGP12788;EGP31485	EGP02699;EGP30794;EGP12788;EGP31485	4	EGP00884	1
Biological process	GO:0048439	flower morphogenesis	5/1312	0.254175	5	EGP19255;EGP24326;EGP21306;EGP09200;EGP08909	EGP21306;EGP09200;EGP08909	3	EGP19255;EGP24326	2
Biological process	GO:0010016	shoot system morphogenesis	22/1312	0.255075	22	EGP25884;EGP07168;EGP19255;EGP19061;EGP09649;EGP10512;EGP15977;EGP26198;EGP13221;EGP26196;EGP24326;EGP10181;EGP20060;EGP21306;EGP19751;EGP16620;EGP09200;EGP08909;EGP26239;EGP33452;novel.1702;EGP31050	EGP25884;EGP07168;EGP19061;EGP09649;EGP10512;EGP15977;EGP26198;EGP13221;EGP26196;EGP10181;EGP20060;EGP21306;EGP09200;EGP08909;EGP26239;novel.1702	16	EGP19255;EGP24326;EGP19751;EGP16620;EGP33452;EGP31050	6
Biological process	GO:0045834	positive regulation of lipid metabolic process	6/1312	0.259063	6	EGP07168;EGP30711;EGP13860;EGP10724;EGP22548;EGP26512	EGP07168;EGP22548;EGP26512	3	EGP30711;EGP13860;EGP10724	3
Biological process	GO:0051235	maintenance of location	6/1312	0.259063	6	EGP30387;EGP06058;EGP08971;EGP29927;EGP30362;EGP21903	EGP30387;EGP06058;EGP08971;EGP29927;EGP30362;EGP21903	6	--	0
Biological process	GO:0018198	peptidyl-cysteine modification	4/1312	0.259391	4	EGP31632;EGP29841;EGP15957;EGP10481	EGP31632;EGP29841;EGP10481	3	EGP15957	1
Biological process	GO:0000162	tryptophan biosynthetic process	3/1312	0.260377	3	EGP16108;novel.2410;EGP16106	novel.2410	1	EGP16108;EGP16106	2
Biological process	GO:0006783	heme biosynthetic process	3/1312	0.260377	3	EGP26723;EGP15862;EGP30343	EGP26723;EGP30343	2	EGP15862	1
Biological process	GO:0009395	phospholipid catabolic process	3/1312	0.260377	3	EGP03077;EGP03182;EGP29483	EGP03077;EGP03182;EGP29483	3	--	0
Biological process	GO:0009404	toxin metabolic process	3/1312	0.260377	3	EGP30699;EGP18102;EGP30701	EGP30699;EGP18102	2	EGP30701	1
Biological process	GO:0009638	phototropism	3/1312	0.260377	3	EGP01228;EGP21891;EGP21908	EGP21891;EGP21908	2	EGP01228	1
Biological process	GO:0010466	negative regulation of peptidase activity	3/1312	0.260377	3	EGP13603;EGP28526;EGP28539	EGP13603;EGP28526;EGP28539	3	--	0
Biological process	GO:0046219	indolalkylamine biosynthetic process	3/1312	0.260377	3	EGP16108;novel.2410;EGP16106	novel.2410	1	EGP16108;EGP16106	2
Biological process	GO:0048826	cotyledon morphogenesis	3/1312	0.260377	3	EGP13221;EGP26239;EGP33452	EGP13221;EGP26239	2	EGP33452	1
Biological process	GO:0052547	regulation of peptidase activity	3/1312	0.260377	3	EGP13603;EGP28526;EGP28539	EGP13603;EGP28526;EGP28539	3	--	0
Biological process	GO:1902290	positive regulation of defense response to oomycetes	3/1312	0.260377	3	EGP29761;EGP32309;EGP32311	EGP29761;EGP32309	2	EGP32311	1
Biological process	GO:2000068	regulation of defense response to insect	3/1312	0.260377	3	EGP25999;EGP20781;EGP31080	EGP25999;EGP20781	2	EGP31080	1
Biological process	GO:0009063	cellular amino acid catabolic process	8/1312	0.261566	8	EGP24622;EGP31475;EGP00684;EGP02960;novel.2017;EGP09532;EGP18457;EGP21129	EGP24622;EGP00684;EGP02960;EGP09532;EGP18457;EGP21129	6	EGP31475;novel.2017	2
Biological process	GO:0009968	negative regulation of signal transduction	12/1312	0.26332	12	EGP28230;EGP13932;EGP07371;EGP21398;EGP00626;EGP09831;EGP14377;EGP31804;EGP14515;EGP14254;EGP02465;EGP17750	EGP28230;EGP13932;EGP07371;EGP21398;EGP00626	5	EGP09831;EGP14377;EGP31804;EGP14515;EGP14254;EGP02465;EGP17750	7
Biological process	GO:1905613	regulation of developmental vegetative growth	5/1312	0.267394	5	EGP07168;EGP24326;EGP21306;EGP09200;EGP08909	EGP07168;EGP21306;EGP09200;EGP08909	4	EGP24326	1
Biological process	GO:0009073	aromatic amino acid family biosynthetic process	6/1312	0.270856	6	EGP16108;EGP04332;EGP06849;novel.2410;EGP09347;EGP16106	EGP04332;EGP06849;novel.2410;EGP09347	4	EGP16108;EGP16106	2
Biological process	GO:0009688	abscisic acid biosynthetic process	6/1312	0.270856	6	EGP07168;EGP31370;EGP30711;EGP10724;EGP18890;EGP22548	EGP07168;EGP22548	2	EGP31370;EGP30711;EGP10724;EGP18890	4
Biological process	GO:0010374	stomatal complex development	6/1312	0.270856	6	EGP20060;novel.1419;EGP00176;EGP00889;novel.2165;novel.460	EGP20060;novel.2165;novel.460	3	novel.1419;EGP00176;EGP00889	3
Biological process	GO:0043289	apocarotenoid biosynthetic process	6/1312	0.270856	6	EGP07168;EGP31370;EGP30711;EGP10724;EGP18890;EGP22548	EGP07168;EGP22548	2	EGP31370;EGP30711;EGP10724;EGP18890	4
Biological process	GO:0051084	'de novo' posttranslational protein folding	6/1312	0.270856	6	EGP09440;EGP32427;EGP13276;EGP28036;EGP09622;novel.929	EGP09440;EGP32427;EGP13276;EGP28036;EGP09622	5	novel.929	1
Biological process	GO:0051085	chaperone cofactor-dependent protein refolding	6/1312	0.270856	6	EGP09440;EGP32427;EGP13276;EGP28036;EGP09622;novel.929	EGP09440;EGP32427;EGP13276;EGP28036;EGP09622	5	novel.929	1
Biological process	GO:1902645	tertiary alcohol biosynthetic process	6/1312	0.270856	6	EGP07168;EGP31370;EGP30711;EGP10724;EGP18890;EGP22548	EGP07168;EGP22548	2	EGP31370;EGP30711;EGP10724;EGP18890	4
Biological process	GO:0034220	ion transmembrane transport	35/1312	0.271245	35	EGP27346;EGP14223;EGP09730;EGP06737;EGP05605;EGP10096;EGP00884;EGP02699;EGP29902;EGP04891;EGP24990;EGP32463;EGP12788;EGP16251;EGP31485;novel.1575;EGP09449;EGP30372;EGP21127;EGP19614;EGP13540;EGP24154;EGP13890;EGP15134;EGP15691;EGP02446;EGP31721;EGP07512;EGP33363;EGP19523;EGP19721;EGP30253;EGP13595;EGP30725;EGP18890	EGP09730;EGP10096;EGP02699;EGP29902;EGP24990;EGP12788;EGP16251;EGP31485;EGP09449;EGP21127;EGP19614;EGP13540;EGP24154;EGP15691;EGP02446;EGP31721;EGP33363;EGP19523;EGP19721	19	EGP27346;EGP14223;EGP06737;EGP05605;EGP00884;EGP04891;EGP32463;novel.1575;EGP30372;EGP13890;EGP15134;EGP07512;EGP30253;EGP13595;EGP30725;EGP18890	16
Biological process	GO:0071368	cellular response to cytokinin stimulus	8/1312	0.271443	8	novel.1548;EGP13932;EGP21398;EGP30078;EGP09831;EGP28373;EGP11523;EGP06227	EGP13932;EGP21398;EGP06227	3	novel.1548;EGP30078;EGP09831;EGP28373;EGP11523	5
Biological process	GO:0071695	anatomical structure maturation	23/1312	0.272891	23	EGP26291;EGP05097;EGP00235;EGP00854;EGP11657;EGP13443;EGP11658;EGP21024;EGP29671;EGP25835;EGP16121;EGP31232;EGP00017;EGP20936;EGP00234;EGP31068;EGP05747;EGP10851;EGP19721;EGP14515;EGP11523;EGP19389;EGP00925	EGP26291;EGP05097;EGP00235;EGP00854;EGP13443;EGP29671;EGP25835;EGP31232;EGP00017;EGP00234;EGP31068;EGP19721	12	EGP11657;EGP11658;EGP21024;EGP16121;EGP20936;EGP05747;EGP10851;EGP14515;EGP11523;EGP19389;EGP00925	11
Biological process	GO:0010929	positive regulation of auxin mediated signaling pathway	2/1312	0.273266	2	EGP28453;EGP28524	--	0	EGP28453;EGP28524	2
Biological process	GO:0010951	negative regulation of endopeptidase activity	2/1312	0.273266	2	EGP28526;EGP28539	EGP28526;EGP28539	2	--	0
Biological process	GO:0035067	negative regulation of histone acetylation	2/1312	0.273266	2	EGP13379;EGP20291	EGP13379	1	EGP20291	1
Biological process	GO:0042761	very long-chain fatty acid biosynthetic process	2/1312	0.273266	2	EGP12462;EGP25937	EGP12462;EGP25937	2	--	0
Biological process	GO:0052548	regulation of endopeptidase activity	2/1312	0.273266	2	EGP28526;EGP28539	EGP28526;EGP28539	2	--	0
Biological process	GO:0071588	hydrogen peroxide mediated signaling pathway	2/1312	0.273266	2	novel.2409;EGP32116	--	0	novel.2409;EGP32116	2
Biological process	GO:1901984	negative regulation of protein acetylation	2/1312	0.273266	2	EGP13379;EGP20291	EGP13379	1	EGP20291	1
Biological process	GO:2000757	negative regulation of peptidyl-lysine acetylation	2/1312	0.273266	2	EGP13379;EGP20291	EGP13379	1	EGP20291	1
Biological process	GO:0036377	arbuscular mycorrhizal association	4/1312	0.274828	4	EGP30350;novel.2208;novel.2207;EGP18912	novel.2207	1	EGP30350;novel.2208;EGP18912	3
Biological process	GO:0070417	cellular response to cold	4/1312	0.274828	4	EGP30794;EGP15957;EGP02432;EGP27510	EGP30794	1	EGP15957;EGP02432;EGP27510	3
Biological process	GO:0015996	chlorophyll catabolic process	3/1312	0.279336	3	EGP01597;EGP16486;EGP18900	EGP16486	1	EGP01597;EGP18900	2
Biological process	GO:0046149	pigment catabolic process	3/1312	0.279336	3	EGP01597;EGP16486;EGP18900	EGP16486	1	EGP01597;EGP18900	2
Biological process	GO:0009624	response to nematode	8/1312	0.281422	8	EGP21158;EGP09197;EGP10991;EGP19614;EGP20751;EGP24496;EGP10470;EGP33452	EGP21158;EGP09197;EGP10991;EGP19614;EGP10470	5	EGP20751;EGP24496;EGP33452	3
Biological process	GO:0044092	negative regulation of molecular function	7/1312	0.282705	7	EGP07290;EGP18709;EGP12517;EGP22353;EGP13603;EGP28526;EGP28539	EGP07290;EGP18709;EGP13603;EGP28526;EGP28539	5	EGP12517;EGP22353	2
Biological process	GO:0034637	cellular carbohydrate biosynthetic process	22/1312	0.282729	22	EGP31337;EGP10901;EGP28160;EGP00919;EGP06299;EGP27962;EGP28574;EGP28121;EGP08658;EGP11314;EGP21392;EGP16394;novel.1115;EGP23939;EGP28487;EGP06555;EGP00220;EGP01207;EGP31455;EGP23428;EGP28106;EGP12460	EGP31337;EGP28160;EGP00919;EGP06299;EGP27962;EGP28574;EGP08658;EGP21392;novel.1115;EGP23939;EGP28487;EGP06555;EGP00220;EGP01207;EGP31455;EGP23428;EGP28106	17	EGP10901;EGP28121;EGP11314;EGP16394;EGP12460	5
Biological process	GO:0002833	positive regulation of response to biotic stimulus	13/1312	0.28295	13	novel.646;EGP25999;EGP12857;novel.775;novel.993;EGP29761;EGP26278;EGP32309;EGP32367;EGP32311;EGP20781;EGP31080;novel.469	novel.646;EGP25999;EGP12857;novel.775;novel.993;EGP29761;EGP26278;EGP32309;EGP20781;novel.469	10	EGP32367;EGP32311;EGP31080	3
Biological process	GO:0006865	amino acid transport	9/1312	0.288764	9	EGP02699;EGP31485;EGP09449;EGP06582;EGP15134;EGP24900;EGP27696;EGP33452;EGP31781	EGP02699;EGP31485;EGP09449	3	EGP06582;EGP15134;EGP24900;EGP27696;EGP33452;EGP31781	6
Biological process	GO:0010115	regulation of abscisic acid biosynthetic process	4/1312	0.290411	4	EGP07168;EGP30711;EGP10724;EGP22548	EGP07168;EGP22548	2	EGP30711;EGP10724	2
Biological process	GO:0042214	terpene metabolic process	4/1312	0.290411	4	EGP07113;EGP19751;EGP19362;EGP00187	--	0	EGP07113;EGP19751;EGP19362;EGP00187	4
Biological process	GO:0071218	cellular response to misfolded protein	4/1312	0.290411	4	EGP22035;EGP10536;EGP09622;novel.857	EGP22035;EGP10536;EGP09622;novel.857	4	--	0
Biological process	GO:0035967	cellular response to topologically incorrect protein	8/1312	0.291495	8	EGP09440;EGP32427;EGP22035;EGP13276;EGP10536;EGP09622;novel.929;novel.857	EGP09440;EGP32427;EGP22035;EGP13276;EGP10536;EGP09622;novel.857	7	novel.929	1
Biological process	GO:0010928	regulation of auxin mediated signaling pathway	5/1312	0.294253	5	EGP28453;EGP04614;EGP28524;EGP10181;EGP14515	EGP04614;EGP10181	2	EGP28453;EGP28524;EGP14515	3
Biological process	GO:0051248	negative regulation of protein metabolic process	10/1312	0.294534	10	EGP13379;EGP18709;EGP12517;EGP21890;EGP22444;EGP13603;EGP27814;EGP28526;EGP28539;EGP20291	EGP13379;EGP18709;EGP21890;EGP22444;EGP13603;EGP27814;EGP28526;EGP28539	8	EGP12517;EGP20291	2
Biological process	GO:0000271	polysaccharide biosynthetic process	23/1312	0.294926	23	EGP31337;EGP10901;EGP28160;EGP00919;EGP06299;EGP11471;EGP27962;EGP28574;EGP08658;EGP11314;EGP21392;EGP16394;novel.1115;EGP23939;EGP28487;EGP06555;EGP00220;EGP01207;EGP21950;EGP24851;EGP31455;EGP23428;EGP28106	EGP31337;EGP28160;EGP00919;EGP06299;EGP27962;EGP28574;EGP08658;EGP21392;novel.1115;EGP23939;EGP28487;EGP06555;EGP00220;EGP01207;EGP24851;EGP31455;EGP23428;EGP28106	18	EGP10901;EGP11471;EGP11314;EGP16394;EGP21950	5
Biological process	GO:0000304	response to singlet oxygen	3/1312	0.298414	3	EGP29598;EGP22443;EGP21542	EGP29598;EGP21542	2	EGP22443	1
Biological process	GO:0032350	regulation of hormone metabolic process	3/1312	0.298414	3	EGP26007;EGP20714;EGP30688	EGP26007	1	EGP20714;EGP30688	2
Biological process	GO:0045861	negative regulation of proteolysis	3/1312	0.298414	3	EGP13603;EGP28526;EGP28539	EGP13603;EGP28526;EGP28539	3	--	0
Biological process	GO:0080001	mucilage extrusion from seed coat	3/1312	0.298414	3	EGP12552;EGP20751;EGP21950	EGP12552	1	EGP20751;EGP21950	2
Biological process	GO:0009071	serine family amino acid catabolic process	2/1312	0.299256	2	EGP18457;EGP21129	EGP18457;EGP21129	2	--	0
Biological process	GO:0009299	mRNA transcription	2/1312	0.299256	2	EGP13046;EGP16338	--	0	EGP13046;EGP16338	2
Biological process	GO:0009938	negative regulation of gibberellic acid mediated signaling pathway	2/1312	0.299256	2	EGP14254;EGP17750	--	0	EGP14254;EGP17750	2
Biological process	GO:0010315	auxin efflux	2/1312	0.299256	2	EGP04614;EGP14515	EGP04614	1	EGP14515	1
Biological process	GO:0010588	cotyledon vascular tissue pattern formation	2/1312	0.299256	2	EGP13221;EGP33452	EGP13221	1	EGP33452	1
Biological process	GO:0015850	organic hydroxy compound transport	2/1312	0.299256	2	EGP13201;EGP10470	EGP10470	1	EGP13201	1
Biological process	GO:0016119	carotene metabolic process	2/1312	0.299256	2	EGP19751;EGP19362	--	0	EGP19751;EGP19362	2
Biological process	GO:0051238	sequestering of metal ion	2/1312	0.299256	2	EGP06058;EGP08971	EGP06058;EGP08971	2	--	0
Biological process	GO:0043067	regulation of programmed cell death	8/1312	0.301655	8	EGP09197;EGP05393;EGP05286;EGP05874;EGP25931;EGP06612;EGP26278;EGP30256	EGP09197;EGP05393;EGP05286;EGP06612;EGP26278;EGP30256	6	EGP05874;EGP25931	2
Biological process	GO:0090698	post-embryonic plant morphogenesis	20/1312	0.303985	20	EGP16692;EGP19255;EGP19061;EGP06308;EGP31343;EGP13046;EGP15937;EGP12517;EGP13221;EGP24326;EGP20060;EGP30796;EGP06431;EGP21306;EGP09200;EGP08909;EGP33662;EGP16338;EGP26239;EGP33452	EGP16692;EGP19061;EGP31343;EGP15937;EGP13221;EGP20060;EGP06431;EGP21306;EGP09200;EGP08909;EGP33662;EGP26239	12	EGP19255;EGP06308;EGP13046;EGP12517;EGP24326;EGP30796;EGP16338;EGP33452	8
Biological process	GO:0032103	positive regulation of response to external stimulus	13/1312	0.305897	13	novel.646;EGP25999;EGP12857;novel.775;novel.993;EGP29761;EGP26278;EGP32309;EGP32367;EGP32311;EGP20781;EGP31080;novel.469	novel.646;EGP25999;EGP12857;novel.775;novel.993;EGP29761;EGP26278;EGP32309;EGP20781;novel.469	10	EGP32367;EGP32311;EGP31080	3
Biological process	GO:0098662	inorganic cation transmembrane transport	13/1312	0.305897	13	EGP27346;EGP14223;EGP05605;EGP04891;EGP24990;EGP30372;EGP21127;EGP19614;EGP24154;EGP15691;EGP19721;EGP30253;EGP30725	EGP24990;EGP21127;EGP19614;EGP24154;EGP15691;EGP19721	6	EGP27346;EGP14223;EGP05605;EGP04891;EGP30372;EGP30253;EGP30725	7
Biological process	GO:0045926	negative regulation of growth	6/1312	0.30694	6	EGP28191;EGP24326;EGP04165;EGP21306;EGP09200;EGP08909	EGP28191;EGP21306;EGP09200;EGP08909	4	EGP24326;EGP04165	2
Biological process	GO:0010026	trichome differentiation	9/1312	0.307741	9	EGP02443;EGP00854;EGP28711;novel.176;EGP06773;EGP11170;EGP26239;EGP11523;EGP00784	EGP02443;EGP00854;EGP28711;novel.176;EGP06773;EGP26239	6	EGP11170;EGP11523;EGP00784	3
Biological process	GO:0009850	auxin metabolic process	7/1312	0.31578	7	EGP16108;EGP26198;EGP26196;novel.2410;EGP30688;novel.700;EGP16106	EGP26198;EGP26196;novel.2410	3	EGP16108;EGP30688;novel.700;EGP16106	4
Biological process	GO:0042177	negative regulation of protein catabolic process	3/1312	0.317559	3	EGP21890;EGP22444;EGP27814	EGP21890;EGP22444;EGP27814	3	--	0
Biological process	GO:2000904	regulation of starch metabolic process	3/1312	0.317559	3	EGP10096;EGP13890;EGP19523	EGP10096;EGP19523	2	EGP13890	1
Biological process	GO:0010038	response to metal ion	25/1312	0.317855	25	EGP09440;EGP25953;EGP21158;EGP07130;EGP28511;EGP28509;EGP28121;EGP26723;EGP16631;EGP10991;EGP06058;EGP33185;EGP09863;EGP14970;EGP02960;EGP18102;EGP10384;novel.1630;EGP18133;EGP20751;EGP31114;EGP21300;EGP03045;EGP31080;EGP15680	EGP09440;EGP25953;EGP21158;EGP07130;EGP26723;EGP16631;EGP10991;EGP06058;EGP33185;EGP09863;EGP14970;EGP02960;EGP18102;EGP18133;EGP31114;EGP21300;EGP15680	17	EGP28511;EGP28509;EGP28121;EGP10384;novel.1630;EGP20751;EGP03045;EGP31080	8
Biological process	GO:0010025	wax biosynthetic process	6/1312	0.319155	6	EGP21416;EGP08904;EGP02677;EGP25937;EGP23937;EGP21415	EGP21416;EGP02677;EGP25937;EGP21415	4	EGP08904;EGP23937	2
Biological process	GO:0046903	secretion	8/1312	0.322199	8	EGP02699;EGP14030;EGP31804;EGP00220;EGP16759;EGP03376;EGP32367;EGP02151	EGP02699;EGP14030;EGP00220;EGP16759;EGP02151	5	EGP31804;EGP03376;EGP32367	3
Biological process	GO:0009250	glucan biosynthetic process	14/1312	0.323347	14	EGP10901;EGP00919;EGP27962;EGP08658;EGP11314;EGP21392;EGP16394;novel.1115;EGP23939;EGP06555;EGP00220;EGP01207;EGP23428;EGP28106	EGP00919;EGP27962;EGP08658;EGP21392;novel.1115;EGP23939;EGP06555;EGP00220;EGP01207;EGP23428;EGP28106	11	EGP10901;EGP11314;EGP16394	3
Biological process	GO:1905393	plant organ formation	11/1312	0.324768	11	EGP16692;EGP19061;EGP09649;EGP31343;EGP15937;EGP15977;EGP12517;EGP30796;EGP06431;EGP19751;EGP16620	EGP16692;EGP19061;EGP09649;EGP31343;EGP15937;EGP15977;EGP06431	7	EGP12517;EGP30796;EGP19751;EGP16620	4
Biological process	GO:0006544	glycine metabolic process	2/1312	0.325087	2	EGP09532;EGP21129	EGP09532;EGP21129	2	--	0
Biological process	GO:0009609	response to symbiotic bacterium	2/1312	0.325087	2	EGP30350;novel.2208	--	0	EGP30350;novel.2208	2
Biological process	GO:0042939	tripeptide transport	2/1312	0.325087	2	EGP13219;novel.1630	EGP13219	1	novel.1630	1
Biological process	GO:0045292	mRNA cis splicing, via spliceosome	2/1312	0.325087	2	EGP15829;EGP15833	--	0	EGP15829;EGP15833	2
Biological process	GO:0046898	response to cycloheximide	2/1312	0.325087	2	EGP09526;EGP20751	EGP09526	1	EGP20751	1
Biological process	GO:0070534	protein K63-linked ubiquitination	2/1312	0.325087	2	EGP28117;EGP23552	EGP28117;EGP23552	2	--	0
Biological process	GO:0071712	ER-associated misfolded protein catabolic process	2/1312	0.325087	2	EGP10536;novel.857	EGP10536;novel.857	2	--	0
Biological process	GO:0080142	regulation of salicylic acid biosynthetic process	2/1312	0.325087	2	EGP30521;EGP10406	EGP10406	1	EGP30521	1
Biological process	GO:1903793	positive regulation of anion transport	2/1312	0.325087	2	EGP00884;EGP12788	EGP12788	1	EGP00884	1
Biological process	GO:0016051	carbohydrate biosynthetic process	33/1312	0.325997	33	EGP13468;EGP31337;EGP25953;EGP10901;EGP28160;EGP00919;EGP06299;EGP11471;EGP27962;EGP28574;EGP28121;EGP08658;EGP15957;EGP11314;EGP19572;EGP07193;EGP07192;EGP21392;EGP16394;novel.1115;EGP23939;EGP28487;EGP06555;EGP00220;EGP01207;EGP21950;EGP24851;EGP31455;EGP23428;EGP16209;EGP28106;EGP28107;EGP12460	EGP13468;EGP31337;EGP25953;EGP28160;EGP00919;EGP06299;EGP27962;EGP28574;EGP08658;EGP07193;EGP07192;EGP21392;novel.1115;EGP23939;EGP28487;EGP06555;EGP00220;EGP01207;EGP24851;EGP31455;EGP23428;EGP28106;EGP28107	23	EGP10901;EGP11471;EGP28121;EGP15957;EGP11314;EGP19572;EGP16394;EGP21950;EGP16209;EGP12460	10
Biological process	GO:0006066	alcohol metabolic process	17/1312	0.326968	17	EGP07168;EGP19170;EGP31370;EGP07193;EGP30711;EGP07192;EGP28478;EGP20936;EGP03182;EGP10724;EGP13773;EGP18890;EGP22548;EGP13435;EGP19389;EGP10869;EGP12460	EGP07168;EGP07193;EGP07192;EGP28478;EGP03182;EGP13773;EGP22548;EGP13435;EGP10869	9	EGP19170;EGP31370;EGP30711;EGP20936;EGP10724;EGP18890;EGP19389;EGP12460	8
Biological process	GO:0018105	peptidyl-serine phosphorylation	9/1312	0.326988	9	EGP12188;EGP13379;EGP31292;EGP09526;EGP33617;EGP21154;EGP03048;EGP15832;EGP15896	EGP13379;EGP31292;EGP09526;EGP33617;EGP21154;EGP03048;EGP15896	7	EGP12188;EGP15832	2
Biological process	GO:0007602	phototransduction	6/1312	0.331441	6	EGP00995;EGP19061;EGP21891;novel.2235;EGP21908;EGP20185	EGP00995;EGP19061;EGP21891;EGP21908	4	novel.2235;EGP20185	2
Biological process	GO:0009585	red, far-red light phototransduction	6/1312	0.331441	6	EGP00995;EGP19061;EGP21891;novel.2235;EGP21908;EGP20185	EGP00995;EGP19061;EGP21891;EGP21908	4	novel.2235;EGP20185	2
Biological process	GO:0009608	response to symbiont	6/1312	0.331441	6	EGP30350;novel.2208;EGP25207;EGP16352;novel.2207;EGP18912	EGP25207;EGP16352;novel.2207	3	EGP30350;novel.2208;EGP18912	3
Biological process	GO:0090696	post-embryonic plant organ development	15/1312	0.33212	15	EGP16692;EGP19061;EGP28524;EGP06308;EGP31343;EGP15937;EGP13537;EGP12517;EGP30796;EGP06431;EGP33662;EGP14515;EGP08799;EGP09666;EGP04311	EGP16692;EGP19061;EGP31343;EGP15937;EGP13537;EGP06431;EGP33662;EGP08799;EGP04311	9	EGP28524;EGP06308;EGP12517;EGP30796;EGP14515;EGP09666	6
Biological process	GO:0018209	peptidyl-serine modification	9/1312	0.336697	9	EGP12188;EGP13379;EGP31292;EGP09526;EGP33617;EGP21154;EGP03048;EGP15832;EGP15896	EGP13379;EGP31292;EGP09526;EGP33617;EGP21154;EGP03048;EGP15896	7	EGP12188;EGP15832	2
Biological process	GO:0045824	negative regulation of innate immune response	3/1312	0.336718	3	EGP26278;EGP07261;EGP16389	EGP26278;EGP07261;EGP16389	3	--	0
Biological process	GO:0046834	lipid phosphorylation	3/1312	0.336718	3	EGP08919;EGP05345;EGP12460	--	0	EGP08919;EGP05345;EGP12460	3
Biological process	GO:0046854	phosphatidylinositol phosphorylation	3/1312	0.336718	3	EGP08919;EGP05345;EGP12460	--	0	EGP08919;EGP05345;EGP12460	3
Biological process	GO:0045489	pectin biosynthetic process	7/1312	0.338201	7	EGP28160;EGP11471;EGP28574;EGP21392;EGP21950;EGP24851;EGP31455	EGP28160;EGP28574;EGP21392;EGP24851;EGP31455	5	EGP11471;EGP21950	2
Biological process	GO:0006631	fatty acid metabolic process	27/1312	0.339054	27	EGP12462;EGP25884;EGP09644;EGP33690;EGP05132;EGP26804;EGP02482;EGP30838;EGP12316;EGP05633;EGP25937;EGP26805;EGP20723;EGP10888;EGP06600;EGP10631;EGP24324;EGP08435;EGP13860;EGP30833;EGP25668;EGP31080;EGP26802;EGP28561;EGP30701;EGP20291;EGP19689	EGP12462;EGP25884;EGP33690;EGP05132;EGP26804;EGP30838;EGP05633;EGP25937;EGP26805;EGP20723;EGP06600;EGP10631;EGP08435;EGP25668;EGP26802;EGP19689	16	EGP09644;EGP02482;EGP12316;EGP10888;EGP24324;EGP13860;EGP30833;EGP31080;EGP28561;EGP30701;EGP20291	11
Biological process	GO:0006928	movement of cell or subcellular component	8/1312	0.342988	8	EGP18192;EGP07037;EGP01400;EGP30956;EGP18310;EGP01402;EGP01401;EGP00141	EGP07037;EGP01400;EGP30956;EGP01402;EGP01401;EGP00141	6	EGP18192;EGP18310	2
Biological process	GO:0035966	response to topologically incorrect protein	8/1312	0.342988	8	EGP09440;EGP32427;EGP22035;EGP13276;EGP10536;EGP09622;novel.929;novel.857	EGP09440;EGP32427;EGP22035;EGP13276;EGP10536;EGP09622;novel.857	7	novel.929	1
Biological process	GO:0010166	wax metabolic process	6/1312	0.343783	6	EGP21416;EGP08904;EGP02677;EGP25937;EGP23937;EGP21415	EGP21416;EGP02677;EGP25937;EGP21415	4	EGP08904;EGP23937	2
Biological process	GO:0070988	demethylation	6/1312	0.343783	6	EGP02830;EGP02831;EGP13379;EGP19849;EGP19847;EGP19848	EGP13379	1	EGP02830;EGP02831;EGP19849;EGP19847;EGP19848	5
Biological process	GO:0006486	protein glycosylation	15/1312	0.346776	15	EGP00919;EGP19749;EGP33562;EGP08658;EGP26716;EGP11314;EGP12073;EGP24326;EGP29761;EGP21306;EGP09200;EGP08909;EGP09203;EGP31009;EGP18463	EGP00919;EGP33562;EGP08658;EGP26716;EGP29761;EGP21306;EGP09200;EGP08909;EGP09203;EGP31009	10	EGP19749;EGP11314;EGP12073;EGP24326;EGP18463	5
Biological process	GO:0043413	macromolecule glycosylation	15/1312	0.346776	15	EGP00919;EGP19749;EGP33562;EGP08658;EGP26716;EGP11314;EGP12073;EGP24326;EGP29761;EGP21306;EGP09200;EGP08909;EGP09203;EGP31009;EGP18463	EGP00919;EGP33562;EGP08658;EGP26716;EGP29761;EGP21306;EGP09200;EGP08909;EGP09203;EGP31009	10	EGP19749;EGP11314;EGP12073;EGP24326;EGP18463	5
Biological process	GO:0042430	indole-containing compound metabolic process	5/1312	0.349089	5	EGP16108;EGP26198;EGP26196;novel.2410;EGP16106	EGP26198;EGP26196;novel.2410	3	EGP16108;EGP16106	2
Biological process	GO:0006108	malate metabolic process	2/1312	0.35066	2	EGP16251;EGP16604	EGP16251;EGP16604	2	--	0
Biological process	GO:0009095	aromatic amino acid family biosynthetic process, prephenate pathway	2/1312	0.35066	2	EGP06849;EGP09347	EGP06849;EGP09347	2	--	0
Biological process	GO:0010215	cellulose microfibril organization	2/1312	0.35066	2	EGP04116;EGP06555	EGP06555	1	EGP04116	1
Biological process	GO:0010274	hydrotropism	2/1312	0.35066	2	EGP06934;EGP10359	EGP06934	1	EGP10359	1
Biological process	GO:0010359	regulation of anion channel activity	2/1312	0.35066	2	EGP00884;EGP12788	EGP12788	1	EGP00884	1
Biological process	GO:0031057	negative regulation of histone modification	2/1312	0.35066	2	EGP13379;EGP20291	EGP13379	1	EGP20291	1
Biological process	GO:0043090	amino acid import	2/1312	0.35066	2	EGP09449;EGP15134	EGP09449	1	EGP15134	1
Biological process	GO:0045144	meiotic sister chromatid segregation	2/1312	0.35066	2	EGP02878;EGP02877	EGP02878;EGP02877	2	--	0
Biological process	GO:0048268	clathrin coat assembly	2/1312	0.35066	2	EGP06065;EGP00718	EGP06065	1	EGP00718	1
Biological process	GO:0051177	meiotic sister chromatid cohesion	2/1312	0.35066	2	EGP02878;EGP02877	EGP02878;EGP02877	2	--	0
Biological process	GO:0030003	cellular cation homeostasis	12/1312	0.352181	12	EGP06737;EGP07130;EGP18914;EGP06058;EGP08971;EGP24990;EGP14970;novel.1002;EGP30372;EGP31143;EGP15718;EGP00513	EGP07130;EGP18914;EGP06058;EGP08971;EGP24990;EGP14970;EGP31143;EGP15718	8	EGP06737;novel.1002;EGP30372;EGP00513	4
Biological process	GO:0030258	lipid modification	12/1312	0.352181	12	EGP08919;EGP09644;EGP33690;EGP19170;EGP18943;EGP05345;EGP12316;EGP05633;EGP15709;EGP20723;EGP18265;EGP12460	EGP33690;EGP18943;EGP05633;EGP15709;EGP20723	5	EGP08919;EGP09644;EGP19170;EGP05345;EGP12316;EGP18265;EGP12460	7
Biological process	GO:0009615	response to virus	13/1312	0.353127	13	EGP16102;EGP09440;EGP19307;EGP16100;EGP25447;EGP28511;EGP02699;EGP28509;EGP19302;EGP07024;novel.929;EGP32309;EGP32311	EGP09440;EGP19307;EGP16100;EGP02699;EGP19302;EGP07024;EGP32309	7	EGP16102;EGP25447;EGP28511;EGP28509;novel.929;EGP32311	6
Biological process	GO:0009110	vitamin biosynthetic process	8/1312	0.353454	8	EGP13468;EGP17030;EGP19572;EGP07193;EGP07192;EGP01212;EGP33757;EGP20638	EGP13468;EGP07193;EGP07192	3	EGP17030;EGP19572;EGP01212;EGP33757;EGP20638	5
Biological process	GO:0000075	cell cycle checkpoint	4/1312	0.353588	4	EGP31754;EGP10090;EGP30715;novel.1650	EGP31754;EGP10090;novel.1650	3	EGP30715	1
Biological process	GO:0009070	serine family amino acid biosynthetic process	4/1312	0.353588	4	EGP13233;EGP05229;EGP30646;EGP09532	EGP13233;EGP05229;EGP09532	3	EGP30646	1
Biological process	GO:0048506	regulation of timing of meristematic phase transition	4/1312	0.353588	4	EGP28191;EGP33631;EGP11523;EGP04011	EGP28191	1	EGP33631;EGP11523;EGP04011	3
Biological process	GO:0048510	regulation of timing of transition from vegetative to reproductive phase	4/1312	0.353588	4	EGP28191;EGP33631;EGP11523;EGP04011	EGP28191	1	EGP33631;EGP11523;EGP04011	3
Biological process	GO:0051788	response to misfolded protein	4/1312	0.353588	4	EGP22035;EGP10536;EGP09622;novel.857	EGP22035;EGP10536;EGP09622;novel.857	4	--	0
Biological process	GO:1902930	regulation of alcohol biosynthetic process	4/1312	0.353588	4	EGP07168;EGP30711;EGP10724;EGP22548	EGP07168;EGP22548	2	EGP30711;EGP10724	2
Biological process	GO:0009101	glycoprotein biosynthetic process	15/1312	0.354153	15	EGP00919;EGP19749;EGP33562;EGP08658;EGP26716;EGP11314;EGP12073;EGP24326;EGP29761;EGP21306;EGP09200;EGP08909;EGP09203;EGP31009;EGP18463	EGP00919;EGP33562;EGP08658;EGP26716;EGP29761;EGP21306;EGP09200;EGP08909;EGP09203;EGP31009	10	EGP19749;EGP11314;EGP12073;EGP24326;EGP18463	5
Biological process	GO:0009119	ribonucleoside metabolic process	3/1312	0.355846	3	EGP21563;EGP23939;EGP04413	EGP21563;EGP23939;EGP04413	3	--	0
Biological process	GO:1901570	fatty acid derivative biosynthetic process	6/1312	0.356168	6	EGP21416;EGP08904;EGP02677;EGP25937;EGP23937;EGP21415	EGP21416;EGP02677;EGP25937;EGP21415	4	EGP08904;EGP23937	2
Biological process	GO:0048511	rhythmic process	16/1312	0.361493	16	EGP02830;EGP02831;EGP24622;EGP31292;EGP13641;EGP26667;EGP26526;EGP09253;EGP24307;EGP10888;novel.2235;EGP30688;EGP11237;EGP31080;EGP04011;EGP30701	EGP24622;EGP31292;EGP26667	3	EGP02830;EGP02831;EGP13641;EGP26526;EGP09253;EGP24307;EGP10888;novel.2235;EGP30688;EGP11237;EGP31080;EGP04011;EGP30701	13
Biological process	GO:0009610	response to symbiotic fungus	5/1312	0.362917	5	EGP30350;novel.2208;EGP16352;novel.2207;EGP18912	EGP16352;novel.2207	2	EGP30350;novel.2208;EGP18912	3
Biological process	GO:0010074	maintenance of meristem identity	8/1312	0.363955	8	EGP00309;EGP13046;EGP21830;EGP27880;EGP03250;EGP22548;novel.1173;EGP20291	EGP21830;EGP27880;EGP03250;EGP22548	4	EGP00309;EGP13046;novel.1173;EGP20291	4
Biological process	GO:0043269	regulation of ion transport	8/1312	0.363955	8	EGP00884;EGP02699;EGP29902;EGP30794;EGP12788;EGP31485;EGP19614;EGP19721	EGP02699;EGP29902;EGP30794;EGP12788;EGP31485;EGP19614;EGP19721	7	EGP00884	1
Biological process	GO:0052546	cell wall pectin metabolic process	6/1312	0.368583	6	EGP28160;EGP10096;EGP25999;EGP21950;EGP13890;EGP19523	EGP28160;EGP10096;EGP25999;EGP19523	4	EGP21950;EGP13890	2
Biological process	GO:0009965	leaf morphogenesis	13/1312	0.369161	13	EGP07168;EGP10512;EGP13221;EGP24326;EGP10181;EGP20060;EGP21306;EGP09200;EGP08909;EGP26239;EGP33452;novel.1702;EGP31050	EGP07168;EGP10512;EGP13221;EGP10181;EGP20060;EGP21306;EGP09200;EGP08909;EGP26239;novel.1702	10	EGP24326;EGP33452;EGP31050	3
Biological process	GO:0051567	histone H3-K9 methylation	4/1312	0.369449	4	EGP13379;EGP19307;EGP19302;EGP13609	EGP13379;EGP19307;EGP19302;EGP13609	4	--	0
Biological process	GO:0071417	cellular response to organonitrogen compound	4/1312	0.369449	4	EGP14051;EGP26023;EGP02631;EGP14053	EGP26023;EGP14053	2	EGP14051;EGP02631	2
Biological process	GO:0048585	negative regulation of response to stimulus	27/1312	0.371499	27	EGP26291;EGP07168;EGP28453;EGP28230;EGP10406;EGP13932;EGP07371;EGP22202;EGP21398;EGP15862;EGP00626;EGP09831;EGP21890;EGP14377;EGP16121;EGP22444;EGP31804;EGP27814;EGP26278;EGP07261;novel.2165;EGP14515;EGP14254;EGP02465;EGP17750;novel.460;EGP16389	EGP26291;EGP07168;EGP28230;EGP10406;EGP13932;EGP07371;EGP22202;EGP21398;EGP00626;EGP21890;EGP22444;EGP27814;EGP26278;EGP07261;novel.2165;novel.460;EGP16389	17	EGP28453;EGP15862;EGP09831;EGP14377;EGP16121;EGP31804;EGP14515;EGP14254;EGP02465;EGP17750	10
Biological process	GO:0002832	negative regulation of response to biotic stimulus	7/1312	0.372178	7	EGP10406;EGP22202;EGP26278;EGP07261;novel.2165;novel.460;EGP16389	EGP10406;EGP22202;EGP26278;EGP07261;novel.2165;novel.460;EGP16389	7	--	0
Biological process	GO:0009637	response to blue light	7/1312	0.372178	7	EGP28191;EGP01228;EGP13537;EGP21891;EGP21908;EGP31080;EGP09666	EGP28191;EGP13537;EGP21891;EGP21908	4	EGP01228;EGP31080;EGP09666	3
Biological process	GO:0010090	trichome morphogenesis	7/1312	0.372178	7	EGP28711;novel.176;EGP06773;EGP11170;EGP26239;EGP11523;EGP00784	EGP28711;novel.176;EGP06773;EGP26239	4	EGP11170;EGP11523;EGP00784	3
Biological process	GO:0032102	negative regulation of response to external stimulus	7/1312	0.372178	7	EGP10406;EGP22202;EGP26278;EGP07261;novel.2165;novel.460;EGP16389	EGP10406;EGP22202;EGP26278;EGP07261;novel.2165;novel.460;EGP16389	7	--	0
Biological process	GO:0000027	ribosomal large subunit assembly	3/1312	0.374898	3	novel.1605;EGP30198;EGP30199	--	0	novel.1605;EGP30198;EGP30199	3
Biological process	GO:0000038	very long-chain fatty acid metabolic process	3/1312	0.374898	3	EGP12462;EGP05132;EGP25937	EGP12462;EGP05132;EGP25937	3	--	0
Biological process	GO:0006268	DNA unwinding involved in DNA replication	3/1312	0.374898	3	EGP20739;novel.1855;EGP15437	novel.1855	1	EGP20739;EGP15437	2
Biological process	GO:0009126	purine nucleoside monophosphate metabolic process	3/1312	0.374898	3	EGP19038;EGP04894;novel.1884	EGP19038;EGP04894	2	novel.1884	1
Biological process	GO:0009127	purine nucleoside monophosphate biosynthetic process	3/1312	0.374898	3	EGP19038;EGP04894;novel.1884	EGP19038;EGP04894	2	novel.1884	1
Biological process	GO:0009167	purine ribonucleoside monophosphate metabolic process	3/1312	0.374898	3	EGP19038;EGP04894;novel.1884	EGP19038;EGP04894	2	novel.1884	1
Biological process	GO:0009168	purine ribonucleoside monophosphate biosynthetic process	3/1312	0.374898	3	EGP19038;EGP04894;novel.1884	EGP19038;EGP04894	2	novel.1884	1
Biological process	GO:0071805	potassium ion transmembrane transport	3/1312	0.374898	3	EGP05605;EGP19614;EGP19721	EGP19614;EGP19721	2	EGP05605	1
Biological process	GO:1903827	regulation of cellular protein localization	3/1312	0.374898	3	EGP14030;EGP02878;EGP02877	EGP14030;EGP02878;EGP02877	3	--	0
Biological process	GO:0001906	cell killing	2/1312	0.37589	2	novel.9;novel.2210	novel.9;novel.2210	2	--	0
Biological process	GO:0010389	regulation of G2/M transition of mitotic cell cycle	2/1312	0.37589	2	EGP10090;EGP30715	EGP10090	1	EGP30715	1
Biological process	GO:0031640	killing of cells of other organism	2/1312	0.37589	2	novel.9;novel.2210	novel.9;novel.2210	2	--	0
Biological process	GO:0032527	protein exit from endoplasmic reticulum	2/1312	0.37589	2	EGP10536;novel.857	EGP10536;novel.857	2	--	0
Biological process	GO:0035834	indole alkaloid metabolic process	2/1312	0.37589	2	EGP12546;EGP31155	EGP12546	1	EGP31155	1
Biological process	GO:0051341	regulation of oxidoreductase activity	2/1312	0.37589	2	EGP08904;EGP23937	--	0	EGP08904;EGP23937	2
Biological process	GO:0072529	pyrimidine-containing compound catabolic process	2/1312	0.37589	2	EGP13754;EGP21563	EGP13754;EGP21563	2	--	0
Biological process	GO:0007623	circadian rhythm	15/1312	0.376444	15	EGP02830;EGP02831;EGP24622;EGP31292;EGP13641;EGP26667;EGP09253;EGP24307;EGP10888;novel.2235;EGP30688;EGP11237;EGP31080;EGP04011;EGP30701	EGP24622;EGP31292;EGP26667	3	EGP02830;EGP02831;EGP13641;EGP09253;EGP24307;EGP10888;novel.2235;EGP30688;EGP11237;EGP31080;EGP04011;EGP30701	12
Biological process	GO:0009827	plant-type cell wall modification	5/1312	0.376757	5	EGP25999;EGP05097;EGP21392;EGP06773;EGP11626	EGP25999;EGP05097;EGP21392;EGP06773	4	EGP11626	1
Biological process	GO:0006875	cellular metal ion homeostasis	10/1312	0.376798	10	EGP07130;EGP18914;EGP06058;EGP08971;EGP14970;novel.1002;EGP30372;EGP31143;EGP15718;EGP00513	EGP07130;EGP18914;EGP06058;EGP08971;EGP14970;EGP31143;EGP15718	7	novel.1002;EGP30372;EGP00513	3
Biological process	GO:0055065	metal ion homeostasis	15/1312	0.383918	15	EGP27346;EGP21158;EGP07130;EGP18914;EGP04891;EGP06058;EGP08971;EGP14970;novel.1002;EGP30372;EGP31143;EGP20714;EGP21127;EGP15718;EGP00513	EGP21158;EGP07130;EGP18914;EGP06058;EGP08971;EGP14970;EGP31143;EGP21127;EGP15718	9	EGP27346;EGP04891;novel.1002;EGP30372;EGP20714;EGP00513	6
Biological process	GO:0009944	polarity specification of adaxial/abaxial axis	4/1312	0.385285	4	EGP14253;EGP20751;EGP24145;EGP20060	EGP14253;EGP24145;EGP20060	3	EGP20751	1
Biological process	GO:0098655	cation transmembrane transport	13/1312	0.385292	13	EGP27346;EGP14223;EGP05605;EGP04891;EGP24990;EGP30372;EGP21127;EGP19614;EGP24154;EGP15691;EGP19721;EGP30253;EGP30725	EGP24990;EGP21127;EGP19614;EGP24154;EGP15691;EGP19721	6	EGP27346;EGP14223;EGP05605;EGP04891;EGP30372;EGP30253;EGP30725	7
Biological process	GO:0071478	cellular response to radiation	11/1312	0.386075	11	EGP00995;EGP19061;EGP30715;EGP15862;EGP21891;EGP21200;novel.2235;EGP21908;EGP20185;EGP33822;EGP26512	EGP00995;EGP19061;EGP21891;EGP21908;EGP33822;EGP26512	6	EGP30715;EGP15862;EGP21200;novel.2235;EGP20185	5
Biological process	GO:0044272	sulfur compound biosynthetic process	13/1312	0.393385	13	EGP25884;EGP16108;EGP17030;EGP05229;EGP30646;EGP01212;novel.2410;EGP04413;EGP24324;novel.1516;EGP16209;EGP33757;EGP16106	EGP25884;EGP05229;novel.2410;EGP04413	4	EGP16108;EGP17030;EGP30646;EGP01212;EGP24324;novel.1516;EGP16209;EGP33757;EGP16106	9
Biological process	GO:0072329	monocarboxylic acid catabolic process	6/1312	0.393448	6	EGP33690;EGP28478;EGP08711;EGP20936;EGP13526;EGP19389	EGP33690;EGP28478;EGP08711;EGP13526	4	EGP20936;EGP19389	2
Biological process	GO:0006563	L-serine metabolic process	3/1312	0.393834	3	EGP13233;EGP05229;EGP18457	EGP13233;EGP05229;EGP18457	3	--	0
Biological process	GO:0051156	glucose 6-phosphate metabolic process	3/1312	0.393834	3	EGP08711;EGP23939;EGP03220	EGP08711;EGP23939;EGP03220	3	--	0
Biological process	GO:0140115	export across plasma membrane	3/1312	0.393834	3	EGP02699;EGP24990;EGP31485	EGP02699;EGP24990;EGP31485	3	--	0
Biological process	GO:0055080	cation homeostasis	18/1312	0.394839	18	EGP27346;EGP21158;EGP06737;EGP07130;EGP18914;EGP04891;EGP06058;EGP08971;EGP24990;EGP14970;novel.1002;EGP30372;novel.1053;EGP31143;EGP20714;EGP21127;EGP15718;EGP00513	EGP21158;EGP07130;EGP18914;EGP06058;EGP08971;EGP24990;EGP14970;EGP31143;EGP21127;EGP15718	10	EGP27346;EGP06737;EGP04891;novel.1002;EGP30372;novel.1053;EGP20714;EGP00513	8
Biological process	GO:0009311	oligosaccharide metabolic process	8/1312	0.395598	8	EGP10096;EGP28121;EGP11386;EGP01163;EGP32103;EGP13890;EGP19523;EGP04011	EGP10096;EGP32103;EGP19523	3	EGP28121;EGP11386;EGP01163;EGP13890;EGP04011	5
Biological process	GO:1903047	mitotic cell cycle process	17/1312	0.396214	17	novel.2248;EGP10901;EGP23891;EGP27962;EGP10536;EGP10090;EGP13377;EGP30715;EGP28222;EGP16394;EGP02878;EGP02877;EGP01207;EGP20726;EGP23428;EGP28106;novel.857	novel.2248;EGP23891;EGP27962;EGP10536;EGP10090;EGP28222;EGP02878;EGP02877;EGP01207;EGP20726;EGP23428;EGP28106;novel.857	13	EGP10901;EGP13377;EGP30715;EGP16394	4
Biological process	GO:0006278	RNA-dependent DNA biosynthetic process	2/1312	0.400704	2	EGP20739;EGP15437	--	0	EGP20739;EGP15437	2
Biological process	GO:0006301	postreplication repair	2/1312	0.400704	2	EGP25428;EGP23552	EGP25428;EGP23552	2	--	0
Biological process	GO:0007004	telomere maintenance via telomerase	2/1312	0.400704	2	EGP20739;EGP15437	--	0	EGP20739;EGP15437	2
Biological process	GO:0010039	response to iron ion	2/1312	0.400704	2	EGP10991;EGP06058	EGP10991;EGP06058	2	--	0
Biological process	GO:0010227	floral organ abscission	2/1312	0.400704	2	EGP33662;EGP19885	EGP33662	1	EGP19885	1
Biological process	GO:0022898	regulation of transmembrane transporter activity	2/1312	0.400704	2	EGP00884;EGP12788	EGP12788	1	EGP00884	1
Biological process	GO:0032412	regulation of ion transmembrane transporter activity	2/1312	0.400704	2	EGP00884;EGP12788	EGP12788	1	EGP00884	1
Biological process	GO:0048441	petal development	2/1312	0.400704	2	EGP06308;EGP13046	--	0	EGP06308;EGP13046	2
Biological process	GO:0048465	corolla development	2/1312	0.400704	2	EGP06308;EGP13046	--	0	EGP06308;EGP13046	2
Biological process	GO:0070726	cell wall assembly	2/1312	0.400704	2	EGP04116;EGP06555	EGP06555	1	EGP04116	1
Biological process	GO:0071668	plant-type cell wall assembly	2/1312	0.400704	2	EGP04116;EGP06555	EGP06555	1	EGP04116	1
Biological process	GO:0080022	primary root development	2/1312	0.400704	2	EGP04733;EGP13251	EGP04733	1	EGP13251	1
Biological process	GO:1901654	response to ketone	2/1312	0.400704	2	EGP09526;EGP20751	EGP09526	1	EGP20751	1
Biological process	GO:1902749	regulation of cell cycle G2/M phase transition	2/1312	0.400704	2	EGP10090;EGP30715	EGP10090	1	EGP30715	1
Biological process	GO:0010091	trichome branching	4/1312	0.401069	4	novel.176;EGP06773;EGP26239;EGP00784	novel.176;EGP06773;EGP26239	3	EGP00784	1
Biological process	GO:0071897	DNA biosynthetic process	4/1312	0.401069	4	EGP13641;EGP25428;EGP20739;EGP15437	EGP25428	1	EGP13641;EGP20739;EGP15437	3
Biological process	GO:0009611	response to wounding	18/1312	0.40166	18	EGP19914;EGP13641;EGP00995;EGP12804;EGP25999;EGP26858;EGP12316;EGP25835;EGP14377;EGP20751;EGP29638;EGP30458;EGP10654;EGP09657;EGP31080;EGP09489;EGP20561;EGP06847	EGP19914;EGP00995;EGP12804;EGP25999;EGP26858;EGP25835;EGP30458	7	EGP13641;EGP12316;EGP14377;EGP20751;EGP29638;EGP10654;EGP09657;EGP31080;EGP09489;EGP20561;EGP06847	11
Biological process	GO:0009411	response to UV	9/1312	0.405613	9	EGP26720;EGP25428;EGP05097;EGP13537;EGP11225;EGP24307;EGP12678;EGP33822;EGP09666	EGP26720;EGP25428;EGP05097;EGP13537;EGP12678;EGP33822	6	EGP11225;EGP24307;EGP09666	3
Biological process	GO:0006749	glutathione metabolic process	6/1312	0.405874	6	EGP30699;EGP18102;EGP00488;EGP21727;EGP18113;EGP04760	EGP30699;EGP18102;EGP21727;EGP18113;EGP04760	5	EGP00488	1
Biological process	GO:0009583	detection of light stimulus	6/1312	0.405874	6	EGP00995;EGP19061;EGP21891;novel.2235;EGP21908;EGP20185	EGP00995;EGP19061;EGP21891;EGP21908	4	novel.2235;EGP20185	2
Biological process	GO:0045165	cell fate commitment	6/1312	0.405874	6	EGP21679;EGP00854;EGP13450;EGP04733;EGP32219;EGP22548	EGP21679;EGP00854;EGP13450;EGP04733;EGP32219;EGP22548	6	--	0
Biological process	GO:0042537	benzene-containing compound metabolic process	8/1312	0.406165	8	EGP24622;EGP30521;EGP06277;EGP10406;novel.2017;EGP22133;EGP13526;EGP30701	EGP24622;EGP06277;EGP10406;EGP22133;EGP13526	5	EGP30521;novel.2017;EGP30701	3
Biological process	GO:0009630	gravitropism	7/1312	0.406326	7	EGP15862;EGP01280;EGP13537;EGP21891;EGP21908;EGP05419;EGP09666	EGP13537;EGP21891;EGP21908;EGP05419	4	EGP15862;EGP01280;EGP09666	3
Biological process	GO:0043200	response to amino acid	3/1312	0.412615	3	EGP14051;EGP12804;EGP14053	EGP12804;EGP14053	2	EGP14051	1
Biological process	GO:0052542	defense response by callose deposition	3/1312	0.412615	3	EGP16108;novel.2410;EGP16106	novel.2410	1	EGP16108;EGP16106	2
Biological process	GO:0072524	pyridine-containing compound metabolic process	3/1312	0.412615	3	EGP05874;EGP06150;EGP21833	EGP06150	1	EGP05874;EGP21833	2
Biological process	GO:2000652	regulation of secondary cell wall biogenesis	3/1312	0.412615	3	EGP14030;EGP06849;EGP09347	EGP14030;EGP06849;EGP09347	3	--	0
Biological process	GO:0006778	porphyrin-containing compound metabolic process	11/1312	0.41269	11	EGP01597;EGP26723;EGP15862;EGP16486;EGP24326;EGP18900;EGP21306;EGP09200;EGP08909;EGP30343;EGP33822	EGP26723;EGP16486;EGP21306;EGP09200;EGP08909;EGP30343;EGP33822	7	EGP01597;EGP15862;EGP24326;EGP18900	4
Biological process	GO:0070085	glycosylation	15/1312	0.413961	15	EGP00919;EGP19749;EGP33562;EGP08658;EGP26716;EGP11314;EGP12073;EGP24326;EGP29761;EGP21306;EGP09200;EGP08909;EGP09203;EGP31009;EGP18463	EGP00919;EGP33562;EGP08658;EGP26716;EGP29761;EGP21306;EGP09200;EGP08909;EGP09203;EGP31009	10	EGP19749;EGP11314;EGP12073;EGP24326;EGP18463	5
Biological process	GO:2000030	regulation of response to red or far red light	4/1312	0.416779	4	EGP15862;EGP33390;EGP20185;EGP09489	EGP33390	1	EGP15862;EGP20185;EGP09489	3
Biological process	GO:0009629	response to gravity	7/1312	0.417702	7	EGP15862;EGP01280;EGP13537;EGP21891;EGP21908;EGP05419;EGP09666	EGP13537;EGP21891;EGP21908;EGP05419	4	EGP15862;EGP01280;EGP09666	3
Biological process	GO:0033013	tetrapyrrole metabolic process	11/1312	0.421572	11	EGP01597;EGP26723;EGP15862;EGP16486;EGP24326;EGP18900;EGP21306;EGP09200;EGP08909;EGP30343;EGP33822	EGP26723;EGP16486;EGP21306;EGP09200;EGP08909;EGP30343;EGP33822	7	EGP01597;EGP15862;EGP24326;EGP18900	4
Biological process	GO:0051174	regulation of phosphorus metabolic process	11/1312	0.421572	11	EGP13379;EGP17805;EGP20657;EGP16278;EGP18709;EGP28222;EGP11464;EGP12517;EGP33545;EGP18281;EGP16279	EGP13379;EGP16278;EGP18709;EGP28222;EGP11464;EGP33545;EGP18281;EGP16279	8	EGP17805;EGP20657;EGP12517	3
Biological process	GO:0007389	pattern specification process	18/1312	0.42218	18	EGP28574;EGP31343;EGP10512;EGP00854;EGP13046;EGP16488;EGP13221;EGP02878;EGP14253;EGP20714;EGP02877;EGP20751;EGP24145;EGP10181;EGP20060;EGP31455;EGP33452;EGP00784	EGP28574;EGP31343;EGP10512;EGP00854;EGP16488;EGP13221;EGP02878;EGP14253;EGP02877;EGP24145;EGP10181;EGP20060;EGP31455	13	EGP13046;EGP20714;EGP20751;EGP33452;EGP00784	5
Biological process	GO:0009606	tropism	10/1312	0.423501	10	EGP01228;EGP15862;EGP01280;EGP13537;EGP06934;EGP21891;EGP10359;EGP21908;EGP05419;EGP09666	EGP13537;EGP06934;EGP21891;EGP21908;EGP05419	5	EGP01228;EGP15862;EGP01280;EGP10359;EGP09666	5
Biological process	GO:0071482	cellular response to light stimulus	10/1312	0.423501	10	EGP00995;EGP19061;EGP15862;EGP21891;EGP21200;novel.2235;EGP21908;EGP20185;EGP33822;EGP26512	EGP00995;EGP19061;EGP21891;EGP21908;EGP33822;EGP26512	6	EGP15862;EGP21200;novel.2235;EGP20185	4
Biological process	GO:0055082	cellular chemical homeostasis	14/1312	0.423648	14	EGP06737;EGP07130;EGP18914;EGP00884;EGP06058;EGP08971;EGP24990;EGP14970;EGP12788;novel.1002;EGP30372;EGP31143;EGP15718;EGP00513	EGP07130;EGP18914;EGP06058;EGP08971;EGP24990;EGP14970;EGP12788;EGP31143;EGP15718	9	EGP06737;EGP00884;novel.1002;EGP30372;EGP00513	5
Biological process	GO:0000086	G2/M transition of mitotic cell cycle	2/1312	0.425042	2	EGP10090;EGP30715	EGP10090	1	EGP30715	1
Biological process	GO:0009163	nucleoside biosynthetic process	2/1312	0.425042	2	EGP23939;EGP04413	EGP23939;EGP04413	2	--	0
Biological process	GO:0009934	regulation of meristem structural organization	2/1312	0.425042	2	EGP30679;EGP20291	--	0	EGP30679;EGP20291	2
Biological process	GO:0010833	telomere maintenance via telomere lengthening	2/1312	0.425042	2	EGP20739;EGP15437	--	0	EGP20739;EGP15437	2
Biological process	GO:0031167	rRNA methylation	2/1312	0.425042	2	EGP06872;EGP06871	EGP06872	1	EGP06871	1
Biological process	GO:0042455	ribonucleoside biosynthetic process	2/1312	0.425042	2	EGP23939;EGP04413	EGP23939;EGP04413	2	--	0
Biological process	GO:0046470	phosphatidylcholine metabolic process	2/1312	0.425042	2	EGP13822;EGP29483	EGP13822;EGP29483	2	--	0
Biological process	GO:0009581	detection of external stimulus	6/1312	0.430651	6	EGP00995;EGP19061;EGP21891;novel.2235;EGP21908;EGP20185	EGP00995;EGP19061;EGP21891;EGP21908	4	novel.2235;EGP20185	2
Biological process	GO:0009582	detection of abiotic stimulus	6/1312	0.430651	6	EGP00995;EGP19061;EGP21891;novel.2235;EGP21908;EGP20185	EGP00995;EGP19061;EGP21891;EGP21908	4	novel.2235;EGP20185	2
Biological process	GO:0006568	tryptophan metabolic process	3/1312	0.431209	3	EGP16108;novel.2410;EGP16106	novel.2410	1	EGP16108;EGP16106	2
Biological process	GO:0006586	indolalkylamine metabolic process	3/1312	0.431209	3	EGP16108;novel.2410;EGP16106	novel.2410	1	EGP16108;EGP16106	2
Biological process	GO:0007062	sister chromatid cohesion	3/1312	0.431209	3	EGP04675;EGP02878;EGP02877	EGP04675;EGP02878;EGP02877	3	--	0
Biological process	GO:0009556	microsporogenesis	3/1312	0.431209	3	EGP08897;EGP20726;EGP27167	EGP08897;EGP20726;EGP27167	3	--	0
Biological process	GO:0010152	pollen maturation	3/1312	0.431209	3	EGP16692;EGP15937;EGP09875	EGP16692;EGP15937;EGP09875	3	--	0
Biological process	GO:0055075	potassium ion homeostasis	3/1312	0.431209	3	EGP27346;EGP04891;EGP21127	EGP21127	1	EGP27346;EGP04891	2
Biological process	GO:0098739	import across plasma membrane	3/1312	0.431209	3	EGP09449;EGP15134;EGP19721	EGP09449;EGP19721	2	EGP15134	1
Biological process	GO:0000911	cytokinesis by cell plate formation	5/1312	0.431887	5	EGP01400;EGP20726;EGP21352;EGP01402;EGP01401	EGP01400;EGP20726;EGP01402;EGP01401	4	EGP21352	1
Biological process	GO:0009851	auxin biosynthetic process	5/1312	0.431887	5	EGP16108;novel.2410;EGP30688;novel.700;EGP16106	novel.2410	1	EGP16108;EGP30688;novel.700;EGP16106	4
Biological process	GO:0030433	ubiquitin-dependent ERAD pathway	5/1312	0.431887	5	EGP10536;EGP09622;EGP08904;EGP23937;novel.857	EGP10536;EGP09622;novel.857	3	EGP08904;EGP23937	2
Biological process	GO:1901699	cellular response to nitrogen compound	5/1312	0.431887	5	EGP14051;EGP26023;EGP01662;EGP02631;EGP14053	EGP26023;EGP01662;EGP14053	3	EGP14051;EGP02631	2
Biological process	GO:0009943	adaxial/abaxial axis specification	4/1312	0.432393	4	EGP14253;EGP20751;EGP24145;EGP20060	EGP14253;EGP24145;EGP20060	3	EGP20751	1
Biological process	GO:0010223	secondary shoot formation	4/1312	0.432393	4	EGP09649;EGP15977;EGP19751;EGP16620	EGP09649;EGP15977	2	EGP19751;EGP16620	2
Biological process	GO:0010346	shoot axis formation	4/1312	0.432393	4	EGP09649;EGP15977;EGP19751;EGP16620	EGP09649;EGP15977	2	EGP19751;EGP16620	2
Biological process	GO:0045595	regulation of cell differentiation	4/1312	0.432393	4	EGP18355;EGP00854;EGP31975;EGP22548	EGP18355;EGP00854;EGP22548	3	EGP31975	1
Biological process	GO:0048481	plant ovule development	4/1312	0.432393	4	EGP31343;EGP14253;EGP24145;EGP21352	EGP31343;EGP14253;EGP24145	3	EGP21352	1
Biological process	GO:0061647	histone H3-K9 modification	4/1312	0.432393	4	EGP13379;EGP19307;EGP19302;EGP13609	EGP13379;EGP19307;EGP19302;EGP13609	4	--	0
Biological process	GO:1902074	response to salt	4/1312	0.432393	4	EGP07371;EGP30711;EGP20751;EGP10724	EGP07371	1	EGP30711;EGP20751;EGP10724	3
Biological process	GO:0006575	cellular modified amino acid metabolic process	10/1312	0.432846	10	EGP30699;EGP08897;EGP19038;EGP18102;EGP00488;EGP21727;novel.1884;EGP18113;EGP04760;EGP22956	EGP30699;EGP08897;EGP19038;EGP18102;EGP21727;EGP18113;EGP04760	7	EGP00488;novel.1884;EGP22956	3
Biological process	GO:0009100	glycoprotein metabolic process	15/1312	0.436567	15	EGP00919;EGP19749;EGP33562;EGP08658;EGP26716;EGP11314;EGP12073;EGP24326;EGP29761;EGP21306;EGP09200;EGP08909;EGP09203;EGP31009;EGP18463	EGP00919;EGP33562;EGP08658;EGP26716;EGP29761;EGP21306;EGP09200;EGP08909;EGP09203;EGP31009	10	EGP19749;EGP11314;EGP12073;EGP24326;EGP18463	5
Biological process	GO:0032269	negative regulation of cellular protein metabolic process	7/1312	0.440387	7	EGP13379;EGP18709;EGP12517;EGP13603;EGP28526;EGP28539;EGP20291	EGP13379;EGP18709;EGP13603;EGP28526;EGP28539	5	EGP12517;EGP20291	2
Biological process	GO:0080147	root hair cell development	7/1312	0.440387	7	EGP00854;EGP13443;EGP25835;EGP00017;EGP19721;EGP14515;EGP11523	EGP00854;EGP13443;EGP25835;EGP00017;EGP19721	5	EGP14515;EGP11523	2
Biological process	GO:0048638	regulation of developmental growth	16/1312	0.44125	16	EGP07168;EGP31526;EGP18355;EGP02631;EGP00669;EGP18133;EGP24326;EGP20751;EGP10076;EGP31975;EGP21306;EGP09200;EGP08909;EGP27880;EGP33822;EGP31362	EGP07168;EGP18355;EGP00669;EGP18133;EGP21306;EGP09200;EGP08909;EGP27880;EGP33822	9	EGP31526;EGP02631;EGP24326;EGP20751;EGP10076;EGP31975;EGP31362	7
Biological process	GO:0050832	defense response to fungus	31/1312	0.444212	31	EGP25953;EGP05468;EGP06220;novel.9;EGP16137;EGP05286;EGP02794;EGP05874;EGP16108;EGP07371;EGP33548;EGP00302;EGP03157;EGP00626;EGP24269;EGP07396;EGP33477;EGP33483;novel.2210;EGP29761;EGP16430;novel.2410;EGP20060;novel.1453;EGP32309;EGP30841;EGP30844;EGP32311;EGP31080;EGP03283;EGP16106	EGP25953;EGP05468;EGP06220;novel.9;EGP16137;EGP05286;EGP02794;EGP07371;EGP33548;EGP03157;EGP00626;EGP33477;EGP33483;novel.2210;EGP29761;novel.2410;EGP20060;novel.1453;EGP32309;EGP30841;EGP30844;EGP03283	22	EGP05874;EGP16108;EGP00302;EGP24269;EGP07396;EGP16430;EGP32311;EGP31080;EGP16106	9
Biological process	GO:0010191	mucilage metabolic process	5/1312	0.445534	5	EGP12552;EGP07337;EGP21347;EGP20751;EGP21950	EGP12552;EGP07337	2	EGP21347;EGP20751;EGP21950	3
Biological process	GO:0045927	positive regulation of growth	5/1312	0.445534	5	EGP07168;EGP01384;EGP20751;EGP18485;EGP21716	EGP07168;EGP18485;EGP21716	3	EGP01384;EGP20751	2
Biological process	GO:0003333	amino acid transmembrane transport	4/1312	0.44789	4	EGP02699;EGP31485;EGP09449;EGP15134	EGP02699;EGP31485;EGP09449	3	EGP15134	1
Biological process	GO:0042026	protein refolding	4/1312	0.44789	4	EGP09440;EGP32427;EGP13276;novel.929	EGP09440;EGP32427;EGP13276	3	novel.929	1
Biological process	GO:0006536	glutamate metabolic process	2/1312	0.448853	2	EGP31475;EGP02960	EGP02960	1	EGP31475	1
Biological process	GO:0007135	meiosis II	2/1312	0.448853	2	EGP02878;EGP02877	EGP02878;EGP02877	2	--	0
Biological process	GO:0010030	positive regulation of seed germination	2/1312	0.448853	2	EGP21606;EGP26512	EGP21606;EGP26512	2	--	0
Biological process	GO:0018904	ether metabolic process	2/1312	0.448853	2	EGP06277;EGP26856	EGP06277;EGP26856	2	--	0
Biological process	GO:0019344	cysteine biosynthetic process	2/1312	0.448853	2	EGP05229;EGP30646	EGP05229	1	EGP30646	1
Biological process	GO:0031537	regulation of anthocyanin metabolic process	2/1312	0.448853	2	EGP21874;EGP16978	EGP21874;EGP16978	2	--	0
Biological process	GO:0034406	cell wall beta-glucan metabolic process	2/1312	0.448853	2	EGP06555;EGP00220	EGP06555;EGP00220	2	--	0
Biological process	GO:0034410	cell wall beta-glucan biosynthetic process	2/1312	0.448853	2	EGP06555;EGP00220	EGP06555;EGP00220	2	--	0
Biological process	GO:0043270	positive regulation of ion transport	2/1312	0.448853	2	EGP00884;EGP12788	EGP12788	1	EGP00884	1
Biological process	GO:0051262	protein tetramerization	2/1312	0.448853	2	EGP16604;EGP18457	EGP16604;EGP18457	2	--	0
Biological process	GO:0052324	plant-type cell wall cellulose biosynthetic process	2/1312	0.448853	2	EGP06555;EGP00220	EGP06555;EGP00220	2	--	0
Biological process	GO:0052541	plant-type cell wall cellulose metabolic process	2/1312	0.448853	2	EGP06555;EGP00220	EGP06555;EGP00220	2	--	0
Biological process	GO:0055071	manganese ion homeostasis	2/1312	0.448853	2	EGP06058;EGP08971	EGP06058;EGP08971	2	--	0
Biological process	GO:0061983	meiosis II cell cycle process	2/1312	0.448853	2	EGP02878;EGP02877	EGP02878;EGP02877	2	--	0
Biological process	GO:0006739	NADP metabolic process	3/1312	0.449584	3	EGP08711;EGP23939;EGP03220	EGP08711;EGP23939;EGP03220	3	--	0
Biological process	GO:0007166	cell surface receptor signaling pathway	3/1312	0.449584	3	EGP02536;EGP14325;EGP30314	EGP02536;EGP14325;EGP30314	3	--	0
Biological process	GO:0010597	green leaf volatile biosynthetic process	3/1312	0.449584	3	EGP10888;EGP06600;EGP30701	EGP06600	1	EGP10888;EGP30701	2
Biological process	GO:0050777	negative regulation of immune response	3/1312	0.449584	3	EGP26278;EGP07261;EGP16389	EGP26278;EGP07261;EGP16389	3	--	0
Biological process	GO:0090558	plant epidermis development	21/1312	0.453849	21	EGP02443;EGP05097;EGP00854;EGP28711;EGP13443;novel.176;EGP06773;EGP25835;EGP00017;EGP20060;EGP11170;novel.1419;EGP00176;EGP19721;EGP00889;novel.2165;EGP26239;EGP14515;EGP11523;EGP00784;novel.460	EGP02443;EGP05097;EGP00854;EGP28711;EGP13443;novel.176;EGP06773;EGP25835;EGP00017;EGP20060;EGP19721;novel.2165;EGP26239;novel.460	14	EGP11170;novel.1419;EGP00176;EGP00889;EGP14515;EGP11523;EGP00784	7
Biological process	GO:0090697	post-embryonic plant organ morphogenesis	9/1312	0.455022	9	EGP16692;EGP19061;EGP06308;EGP31343;EGP15937;EGP12517;EGP30796;EGP06431;EGP33662	EGP16692;EGP19061;EGP31343;EGP15937;EGP06431;EGP33662	6	EGP06308;EGP12517;EGP30796	3
Biological process	GO:0006766	vitamin metabolic process	8/1312	0.45881	8	EGP13468;EGP17030;EGP19572;EGP07193;EGP07192;EGP01212;EGP33757;EGP20638	EGP13468;EGP07193;EGP07192	3	EGP17030;EGP19572;EGP01212;EGP33757;EGP20638	5
Biological process	GO:0048440	carpel development	5/1312	0.459097	5	EGP31343;EGP14253;EGP24145;EGP21352;EGP30679	EGP31343;EGP14253;EGP24145	3	EGP21352;EGP30679	2
Biological process	GO:0001763	morphogenesis of a branching structure	4/1312	0.463251	4	EGP09649;EGP15977;EGP19751;EGP16620	EGP09649;EGP15977	2	EGP19751;EGP16620	2
Biological process	GO:0009309	amine biosynthetic process	4/1312	0.463251	4	EGP16108;novel.2410;EGP04413;EGP16106	novel.2410;EGP04413	2	EGP16108;EGP16106	2
Biological process	GO:0040034	regulation of development, heterochronic	4/1312	0.463251	4	EGP28191;EGP33631;EGP11523;EGP04011	EGP28191	1	EGP33631;EGP11523;EGP04011	3
Biological process	GO:0042401	cellular biogenic amine biosynthetic process	4/1312	0.463251	4	EGP16108;novel.2410;EGP04413;EGP16106	novel.2410;EGP04413	2	EGP16108;EGP16106	2
Biological process	GO:0098656	anion transmembrane transport	19/1312	0.466658	19	EGP09730;EGP06737;EGP00884;EGP02699;EGP32463;EGP12788;EGP16251;EGP31485;novel.1575;EGP09449;EGP13540;EGP24154;EGP15134;EGP02446;EGP31721;EGP07512;EGP33363;EGP13595;EGP18890	EGP09730;EGP02699;EGP12788;EGP16251;EGP31485;EGP09449;EGP13540;EGP24154;EGP02446;EGP31721;EGP33363	11	EGP06737;EGP00884;EGP32463;novel.1575;EGP15134;EGP07512;EGP13595;EGP18890	8
Biological process	GO:0008361	regulation of cell size	3/1312	0.467713	3	EGP13537;EGP09489;EGP09666	EGP13537	1	EGP09489;EGP09666	2
Biological process	GO:0010082	regulation of root meristem growth	3/1312	0.467713	3	EGP10076;EGP27880;EGP31362	EGP27880	1	EGP10076;EGP31362	2
Biological process	GO:0019372	lipoxygenase pathway	3/1312	0.467713	3	EGP10888;EGP06600;EGP30701	EGP06600	1	EGP10888;EGP30701	2
Biological process	GO:0006012	galactose metabolic process	2/1312	0.472095	2	EGP04557;EGP31011	EGP04557	1	EGP31011	1
Biological process	GO:0006094	gluconeogenesis	2/1312	0.472095	2	EGP25953;EGP28107	EGP25953;EGP28107	2	--	0
Biological process	GO:0006566	threonine metabolic process	2/1312	0.472095	2	EGP09532;EGP18457	EGP09532;EGP18457	2	--	0
Biological process	GO:0009697	salicylic acid biosynthetic process	2/1312	0.472095	2	EGP30521;EGP10406	EGP10406	1	EGP30521	1
Biological process	GO:0010037	response to carbon dioxide	2/1312	0.472095	2	novel.2165;novel.460	novel.2165;novel.460	2	--	0
Biological process	GO:0030198	extracellular matrix organization	2/1312	0.472095	2	EGP04116;EGP06555	EGP06555	1	EGP04116	1
Biological process	GO:0042398	cellular modified amino acid biosynthetic process	2/1312	0.472095	2	EGP08897;EGP22956	EGP08897	1	EGP22956	1
Biological process	GO:0043062	extracellular structure organization	2/1312	0.472095	2	EGP04116;EGP06555	EGP06555	1	EGP04116	1
Biological process	GO:0044839	cell cycle G2/M phase transition	2/1312	0.472095	2	EGP10090;EGP30715	EGP10090	1	EGP30715	1
Biological process	GO:0046885	regulation of hormone biosynthetic process	2/1312	0.472095	2	EGP26007;EGP30688	EGP26007	1	EGP30688	1
Biological process	GO:0010941	regulation of cell death	9/1312	0.47463	9	EGP09197;EGP05393;EGP05286;EGP02794;EGP05874;EGP25931;EGP06612;EGP26278;EGP30256	EGP09197;EGP05393;EGP05286;EGP02794;EGP06612;EGP26278;EGP30256	7	EGP05874;EGP25931	2
Biological process	GO:0006812	cation transport	24/1312	0.474999	24	EGP27346;EGP14223;EGP05605;EGP07130;EGP14051;EGP04891;EGP24990;EGP14970;EGP02432;novel.1932;EGP30372;EGP14053;novel.1053;EGP21127;EGP19614;EGP24154;EGP15691;EGP15718;EGP16717;EGP00513;EGP19721;EGP30253;EGP30725;EGP15980	EGP07130;EGP24990;EGP14970;EGP14053;EGP21127;EGP19614;EGP24154;EGP15691;EGP15718;EGP19721;EGP15980	11	EGP27346;EGP14223;EGP05605;EGP14051;EGP04891;EGP02432;novel.1932;EGP30372;novel.1053;EGP16717;EGP00513;EGP30253;EGP30725	13
Biological process	GO:0032879	regulation of localization	14/1312	0.478219	14	EGP19886;EGP00884;EGP02699;EGP29902;EGP30794;EGP14030;EGP12788;EGP31485;EGP02878;EGP19614;EGP02877;EGP01682;EGP27005;EGP19721	EGP19886;EGP02699;EGP29902;EGP30794;EGP14030;EGP12788;EGP31485;EGP02878;EGP19614;EGP02877;EGP01682;EGP27005;EGP19721	13	EGP00884	1
Biological process	GO:0018208	peptidyl-proline modification	4/1312	0.478459	4	EGP13100;EGP28764;EGP33440;EGP31655	EGP13100;EGP28764;EGP33440;EGP31655	4	--	0
Biological process	GO:0034404	nucleobase-containing small molecule biosynthetic process	4/1312	0.478459	4	EGP05874;EGP13754;EGP23939;EGP04413	EGP13754;EGP23939;EGP04413	3	EGP05874	1
Biological process	GO:0034620	cellular response to unfolded protein	4/1312	0.478459	4	EGP09440;EGP32427;EGP13276;novel.929	EGP09440;EGP32427;EGP13276	3	novel.929	1
Biological process	GO:0019953	sexual reproduction	12/1312	0.478806	12	EGP13379;EGP08897;EGP02677;EGP19117;EGP08711;EGP10076;EGP20726;EGP19115;EGP15718;EGP27167;EGP17260;EGP31362	EGP13379;EGP08897;EGP02677;EGP19117;EGP08711;EGP20726;EGP19115;EGP15718;EGP27167;EGP17260	10	EGP10076;EGP31362	2
Biological process	GO:0044703	multi-organism reproductive process	12/1312	0.478806	12	EGP13379;EGP08897;EGP02677;EGP19117;EGP08711;EGP10076;EGP20726;EGP19115;EGP15718;EGP27167;EGP17260;EGP31362	EGP13379;EGP08897;EGP02677;EGP19117;EGP08711;EGP20726;EGP19115;EGP15718;EGP27167;EGP17260	10	EGP10076;EGP31362	2
Biological process	GO:0031348	negative regulation of defense response	10/1312	0.479311	10	EGP10406;EGP22202;EGP21890;EGP22444;EGP27814;EGP26278;EGP07261;novel.2165;novel.460;EGP16389	EGP10406;EGP22202;EGP21890;EGP22444;EGP27814;EGP26278;EGP07261;novel.2165;novel.460;EGP16389	10	--	0
Biological process	GO:0042752	regulation of circadian rhythm	6/1312	0.479599	6	EGP02830;EGP02831;EGP31292;EGP24307;novel.2235;EGP11237	EGP31292	1	EGP02830;EGP02831;EGP24307;novel.2235;EGP11237	5
Biological process	GO:0019751	polyol metabolic process	7/1312	0.485255	7	EGP19170;EGP07193;EGP07192;EGP03182;EGP13773;EGP10869;EGP12460	EGP07193;EGP07192;EGP03182;EGP13773;EGP10869	5	EGP19170;EGP12460	2
Biological process	GO:0006690	icosanoid metabolic process	3/1312	0.485569	3	EGP10888;EGP06600;EGP30701	EGP06600	1	EGP10888;EGP30701	2
Biological process	GO:0031058	positive regulation of histone modification	3/1312	0.485569	3	EGP13379;EGP31804;EGP20291	EGP13379	1	EGP31804;EGP20291	2
Biological process	GO:0044347	cell wall polysaccharide catabolic process	3/1312	0.485569	3	EGP06071;EGP32972;EGP05448	EGP06071;EGP05448	2	EGP32972	1
Biological process	GO:0045493	xylan catabolic process	3/1312	0.485569	3	EGP06071;EGP32972;EGP05448	EGP06071;EGP05448	2	EGP32972	1
Biological process	GO:0048359	mucilage metabolic process involved in seed coat development	3/1312	0.485569	3	EGP12552;EGP21347;EGP20751	EGP12552	1	EGP21347;EGP20751	2
Biological process	GO:0098657	import into cell	3/1312	0.485569	3	EGP09449;EGP15134;EGP19721	EGP09449;EGP19721	2	EGP15134	1
Biological process	GO:0006817	phosphate ion transport	5/1312	0.48592	5	EGP30794;EGP16352;EGP16353;EGP24154;EGP03306	EGP30794;EGP16352;EGP16353;EGP24154	4	EGP03306	1
Biological process	GO:0048764	trichoblast maturation	8/1312	0.489994	8	EGP05097;EGP00854;EGP13443;EGP25835;EGP00017;EGP19721;EGP14515;EGP11523	EGP05097;EGP00854;EGP13443;EGP25835;EGP00017;EGP19721	6	EGP14515;EGP11523	2
Biological process	GO:0048765	root hair cell differentiation	8/1312	0.489994	8	EGP05097;EGP00854;EGP13443;EGP25835;EGP00017;EGP19721;EGP14515;EGP11523	EGP05097;EGP00854;EGP13443;EGP25835;EGP00017;EGP19721	6	EGP14515;EGP11523	2
Biological process	GO:0016579	protein deubiquitination	6/1312	0.491649	6	EGP31929;EGP30764;EGP00309;EGP17335;EGP03250;novel.1173	EGP31929;EGP03250	2	EGP30764;EGP00309;EGP17335;novel.1173	4
Biological process	GO:0006986	response to unfolded protein	4/1312	0.493496	4	EGP09440;EGP32427;EGP13276;novel.929	EGP09440;EGP32427;EGP13276	3	novel.929	1
Biological process	GO:0080156	mitochondrial mRNA modification	4/1312	0.493496	4	EGP15841;EGP15874;EGP15777;novel.2591	EGP15841;EGP15874;EGP15777;novel.2591	4	--	0
Biological process	GO:0140352	export from cell	9/1312	0.494083	9	EGP02699;EGP14030;EGP24990;EGP31485;EGP31804;EGP00220;EGP13201;EGP16759;EGP32367	EGP02699;EGP14030;EGP24990;EGP31485;EGP00220;EGP16759	6	EGP31804;EGP13201;EGP32367	3
Biological process	GO:0009166	nucleotide catabolic process	2/1312	0.494735	2	EGP05874;EGP13754	EGP13754	1	EGP05874	1
Biological process	GO:0019319	hexose biosynthetic process	2/1312	0.494735	2	EGP25953;EGP28107	EGP25953;EGP28107	2	--	0
Biological process	GO:0036123	histone H3-K9 dimethylation	2/1312	0.494735	2	EGP13379;EGP13609	EGP13379;EGP13609	2	--	0
Biological process	GO:1901988	negative regulation of cell cycle phase transition	2/1312	0.494735	2	EGP10090;EGP30715	EGP10090	1	EGP30715	1
Biological process	GO:1901991	negative regulation of mitotic cell cycle phase transition	2/1312	0.494735	2	EGP10090;EGP30715	EGP10090	1	EGP30715	1
Biological process	GO:0006310	DNA recombination	33/1312	0.499789	33	EGP16756;novel.222;EGP04675;novel.1800;novel.1507;EGP10090;EGP20739;EGP30715;novel.2164;novel.56;EGP29426;novel.994;EGP28939;EGP33648;EGP02878;novel.775;novel.2093;EGP02877;novel.1855;novel.1401;EGP32505;EGP08937;EGP15737;EGP15437;novel.1328;novel.906;novel.1722;EGP33175;EGP00789;EGP20291;EGP15680;EGP17260;EGP20087	EGP16756;novel.222;EGP04675;novel.1507;EGP10090;novel.2164;novel.56;EGP29426;novel.994;EGP28939;EGP33648;EGP02878;novel.775;EGP02877;novel.1855;novel.1401;EGP32505;EGP08937;novel.1328;novel.906;EGP33175;EGP15680;EGP17260;EGP20087	24	novel.1800;EGP20739;EGP30715;novel.2093;EGP15737;EGP15437;novel.1722;EGP00789;EGP20291	9
Biological process	GO:0010054	trichoblast differentiation	8/1312	0.500282	8	EGP05097;EGP00854;EGP13443;EGP25835;EGP00017;EGP19721;EGP14515;EGP11523	EGP05097;EGP00854;EGP13443;EGP25835;EGP00017;EGP19721	6	EGP14515;EGP11523	2
Biological process	GO:0019827	stem cell population maintenance	8/1312	0.500282	8	EGP00309;EGP13046;EGP21830;EGP27880;EGP03250;EGP22548;novel.1173;EGP20291	EGP21830;EGP27880;EGP03250;EGP22548	4	EGP00309;EGP13046;novel.1173;EGP20291	4
Biological process	GO:0048469	cell maturation	8/1312	0.500282	8	EGP05097;EGP00854;EGP13443;EGP25835;EGP00017;EGP19721;EGP14515;EGP11523	EGP05097;EGP00854;EGP13443;EGP25835;EGP00017;EGP19721	6	EGP14515;EGP11523	2
Biological process	GO:0098727	maintenance of cell number	8/1312	0.500282	8	EGP00309;EGP13046;EGP21830;EGP27880;EGP03250;EGP22548;novel.1173;EGP20291	EGP21830;EGP27880;EGP03250;EGP22548	4	EGP00309;EGP13046;novel.1173;EGP20291	4
Biological process	GO:0006541	glutamine metabolic process	3/1312	0.50313	3	EGP04665;EGP04894;EGP15762	EGP04665;EGP04894;EGP15762	3	--	0
Biological process	GO:0006879	cellular iron ion homeostasis	3/1312	0.50313	3	EGP06058;EGP08971;EGP00513	EGP06058;EGP08971	2	EGP00513	1
Biological process	GO:0009631	cold acclimation	3/1312	0.50313	3	EGP11266;EGP29539;EGP11268	EGP29539	1	EGP11266;EGP11268	2
Biological process	GO:0048232	male gamete generation	6/1312	0.503606	6	EGP13379;EGP02677;EGP10076;EGP15718;EGP17260;EGP31362	EGP13379;EGP02677;EGP15718;EGP17260	4	EGP10076;EGP31362	2
Biological process	GO:0006109	regulation of carbohydrate metabolic process	9/1312	0.503737	9	EGP13468;EGP10096;EGP25999;EGP15957;EGP13890;EGP18485;EGP21716;EGP16209;EGP19523	EGP13468;EGP10096;EGP25999;EGP18485;EGP21716;EGP19523	6	EGP15957;EGP13890;EGP16209	3
Biological process	GO:0042744	hydrogen peroxide catabolic process	9/1312	0.503737	9	EGP28812;EGP30562;EGP23698;EGP30989;EGP33545;EGP27988;EGP06080;EGP30890;EGP02792	EGP28812;EGP30562;EGP23698;EGP33545;EGP27988;EGP06080	6	EGP30989;EGP30890;EGP02792	3
Biological process	GO:0046165	alcohol biosynthetic process	9/1312	0.503737	9	EGP07168;EGP31370;EGP30711;EGP10724;EGP18890;EGP22548;EGP13435;EGP10869;EGP12460	EGP07168;EGP22548;EGP13435;EGP10869	4	EGP31370;EGP30711;EGP10724;EGP18890;EGP12460	5
Biological process	GO:0006471	protein ADP-ribosylation	1/1312	0.507039	1	EGP32101	EGP32101	1	--	0
Biological process	GO:0006565	L-serine catabolic process	1/1312	0.507039	1	EGP18457	EGP18457	1	--	0
Biological process	GO:0006734	NADH metabolic process	1/1312	0.507039	1	EGP09193	EGP09193	1	--	0
Biological process	GO:0009831	plant-type cell wall modification involved in multidimensional cell growth	1/1312	0.507039	1	EGP11626	--	0	EGP11626	1
Biological process	GO:0010497	plasmodesmata-mediated intercellular transport	1/1312	0.507039	1	EGP16285	EGP16285	1	--	0
Biological process	GO:0016123	xanthophyll biosynthetic process	1/1312	0.507039	1	EGP31370	--	0	EGP31370	1
Biological process	GO:0030834	regulation of actin filament depolymerization	1/1312	0.507039	1	EGP17263	EGP17263	1	--	0
Biological process	GO:0033319	UDP-D-xylose metabolic process	1/1312	0.507039	1	EGP21838	EGP21838	1	--	0
Biological process	GO:0033320	UDP-D-xylose biosynthetic process	1/1312	0.507039	1	EGP21838	EGP21838	1	--	0
Biological process	GO:0034051	negative regulation of plant-type hypersensitive response	1/1312	0.507039	1	EGP26278	EGP26278	1	--	0
Biological process	GO:0035066	positive regulation of histone acetylation	1/1312	0.507039	1	EGP20291	--	0	EGP20291	1
Biological process	GO:0042938	dipeptide transport	1/1312	0.507039	1	EGP13219	EGP13219	1	--	0
Biological process	GO:0071479	cellular response to ionizing radiation	1/1312	0.507039	1	EGP30715	--	0	EGP30715	1
Biological process	GO:0071731	response to nitric oxide	1/1312	0.507039	1	EGP01662	EGP01662	1	--	0
Biological process	GO:0072526	pyridine-containing compound catabolic process	1/1312	0.507039	1	EGP05874	--	0	EGP05874	1
Biological process	GO:0080182	histone H3-K4 trimethylation	1/1312	0.507039	1	EGP20291	--	0	EGP20291	1
Biological process	GO:1900111	positive regulation of histone H3-K9 dimethylation	1/1312	0.507039	1	EGP13379	EGP13379	1	--	0
Biological process	GO:1901985	positive regulation of protein acetylation	1/1312	0.507039	1	EGP20291	--	0	EGP20291	1
Biological process	GO:2000278	regulation of DNA biosynthetic process	1/1312	0.507039	1	EGP13641	--	0	EGP13641	1
Biological process	GO:2000758	positive regulation of peptidyl-lysine acetylation	1/1312	0.507039	1	EGP20291	--	0	EGP20291	1
Biological process	GO:2001293	malonyl-CoA metabolic process	1/1312	0.507039	1	EGP25884	EGP25884	1	--	0
Biological process	GO:2001295	malonyl-CoA biosynthetic process	1/1312	0.507039	1	EGP25884	EGP25884	1	--	0
Biological process	GO:0022412	cellular process involved in reproduction in multicellular organism	7/1312	0.507309	7	EGP13379;EGP02677;EGP08711;EGP10076;EGP15718;EGP17260;EGP31362	EGP13379;EGP02677;EGP08711;EGP15718;EGP17260	5	EGP10076;EGP31362	2
Biological process	GO:0048235	pollen sperm cell differentiation	4/1312	0.508347	4	EGP02677;EGP10076;EGP15718;EGP31362	EGP02677;EGP15718	2	EGP10076;EGP31362	2
Biological process	GO:0065001	specification of axis polarity	4/1312	0.508347	4	EGP14253;EGP20751;EGP24145;EGP20060	EGP14253;EGP24145;EGP20060	3	EGP20751	1
Biological process	GO:0044275	cellular carbohydrate catabolic process	5/1312	0.512258	5	EGP07193;EGP07192;EGP08711;EGP06995;EGP04011	EGP07193;EGP07192;EGP08711;EGP06995	4	EGP04011	1
Biological process	GO:0048509	regulation of meristem development	5/1312	0.512258	5	EGP28191;EGP20751;EGP33631;EGP11523;EGP04011	EGP28191	1	EGP20751;EGP33631;EGP11523;EGP04011	4
Biological process	GO:0010112	regulation of systemic acquired resistance	2/1312	0.516747	2	EGP21277;EGP22202	EGP22202	1	EGP21277	1
Biological process	GO:0010582	floral meristem determinacy	2/1312	0.516747	2	EGP25915;EGP30679	--	0	EGP25915;EGP30679	2
Biological process	GO:0019362	pyridine nucleotide metabolic process	2/1312	0.516747	2	EGP05874;EGP06150	EGP06150	1	EGP05874	1
Biological process	GO:0030641	regulation of cellular pH	2/1312	0.516747	2	EGP06737;EGP24990	EGP24990	1	EGP06737	1
Biological process	GO:0046855	inositol phosphate dephosphorylation	2/1312	0.516747	2	EGP19170;EGP12460	--	0	EGP19170;EGP12460	2
Biological process	GO:0051453	regulation of intracellular pH	2/1312	0.516747	2	EGP06737;EGP24990	EGP24990	1	EGP06737	1
Biological process	GO:0071230	cellular response to amino acid stimulus	2/1312	0.516747	2	EGP14051;EGP14053	EGP14053	1	EGP14051	1
Biological process	GO:0071545	inositol phosphate catabolic process	2/1312	0.516747	2	EGP19170;EGP12460	--	0	EGP19170;EGP12460	2
Biological process	GO:0010051	xylem and phloem pattern formation	7/1312	0.518217	7	EGP28574;EGP10512;EGP16488;EGP13221;EGP10181;EGP31455;EGP33452	EGP28574;EGP10512;EGP16488;EGP13221;EGP10181;EGP31455	6	EGP33452	1
Biological process	GO:0010305	leaf vascular tissue pattern formation	3/1312	0.520378	3	EGP10512;EGP16488;EGP10181	EGP10512;EGP16488;EGP10181	3	--	0
Biological process	GO:0015748	organophosphate ester transport	3/1312	0.520378	3	EGP05443;EGP22231;EGP31721	EGP31721	1	EGP05443;EGP22231	2
Biological process	GO:0032880	regulation of protein localization	3/1312	0.520378	3	EGP14030;EGP02878;EGP02877	EGP14030;EGP02878;EGP02877	3	--	0
Biological process	GO:0071472	cellular response to salt stress	3/1312	0.520378	3	EGP26198;EGP30372;EGP26196	EGP26198;EGP26196	2	EGP30372	1
Biological process	GO:1905269	positive regulation of chromatin organization	3/1312	0.520378	3	EGP13379;EGP31804;EGP20291	EGP13379	1	EGP31804;EGP20291	2
Biological process	GO:2000012	regulation of auxin polar transport	3/1312	0.520378	3	EGP19886;EGP01682;EGP27005	EGP19886;EGP01682;EGP27005	3	--	0
Biological process	GO:0015994	chlorophyll metabolic process	9/1312	0.522879	9	EGP01597;EGP26723;EGP15862;EGP16486;EGP24326;EGP18900;EGP21306;EGP09200;EGP08909	EGP26723;EGP16486;EGP21306;EGP09200;EGP08909	5	EGP01597;EGP15862;EGP24326;EGP18900	4
Biological process	GO:0035670	plant-type ovary development	4/1312	0.522999	4	EGP31343;EGP14253;EGP24145;EGP21352	EGP31343;EGP14253;EGP24145	3	EGP21352	1
Biological process	GO:0048825	cotyledon development	4/1312	0.522999	4	EGP13221;EGP33734;EGP26239;EGP33452	EGP13221;EGP33734;EGP26239	3	EGP33452	1
Biological process	GO:0071229	cellular response to acid chemical	5/1312	0.525218	5	EGP14051;EGP26198;EGP14053;EGP26196;EGP26512	EGP26198;EGP14053;EGP26196;EGP26512	4	EGP14051	1
Biological process	GO:0030001	metal ion transport	8/1312	0.530744	8	EGP14051;EGP30372;EGP14053;EGP15691;EGP16717;EGP30253;EGP30725;EGP15980	EGP14053;EGP15691;EGP15980	3	EGP14051;EGP30372;EGP16717;EGP30253;EGP30725	5
Biological process	GO:0090626	plant epidermis morphogenesis	8/1312	0.530744	8	EGP28711;novel.176;EGP06773;EGP20060;EGP11170;EGP26239;EGP11523;EGP00784	EGP28711;novel.176;EGP06773;EGP20060;EGP26239	5	EGP11170;EGP11523;EGP00784	3
Biological process	GO:0000278	mitotic cell cycle	19/1312	0.532485	19	novel.2248;EGP10901;EGP23891;EGP27962;EGP10536;EGP10090;EGP13377;EGP30715;EGP28222;EGP16394;novel.1650;EGP02878;EGP20714;EGP02877;EGP01207;EGP20726;EGP23428;EGP28106;novel.857	novel.2248;EGP23891;EGP27962;EGP10536;EGP10090;EGP28222;novel.1650;EGP02878;EGP02877;EGP01207;EGP20726;EGP23428;EGP28106;novel.857	14	EGP10901;EGP13377;EGP30715;EGP16394;EGP20714	5
Biological process	GO:0019220	regulation of phosphate metabolic process	10/1312	0.53389	10	EGP13379;EGP17805;EGP20657;EGP16278;EGP18709;EGP28222;EGP11464;EGP12517;EGP18281;EGP16279	EGP13379;EGP16278;EGP18709;EGP28222;EGP11464;EGP18281;EGP16279	7	EGP17805;EGP20657;EGP12517	3
Biological process	GO:0002683	negative regulation of immune system process	3/1312	0.537294	3	EGP26278;EGP07261;EGP16389	EGP26278;EGP07261;EGP16389	3	--	0
Biological process	GO:0010252	auxin homeostasis	3/1312	0.537294	3	EGP04614;EGP30796;EGP14515	EGP04614	1	EGP30796;EGP14515	2
Biological process	GO:0016036	cellular response to phosphate starvation	5/1312	0.538025	5	EGP25953;EGP16692;EGP15937;EGP02482;EGP09921	EGP25953;EGP16692;EGP15937;EGP09921	4	EGP02482	1
Biological process	GO:0006560	proline metabolic process	2/1312	0.538111	2	EGP31475;EGP27512	EGP27512	1	EGP31475	1
Biological process	GO:0010109	regulation of photosynthesis	2/1312	0.538111	2	EGP15957;EGP28691	EGP28691	1	EGP15957	1
Biological process	GO:0010229	inflorescence development	2/1312	0.538111	2	EGP10195;EGP20060	EGP10195;EGP20060	2	--	0
Biological process	GO:0018027	peptidyl-lysine dimethylation	2/1312	0.538111	2	EGP13379;EGP13609	EGP13379;EGP13609	2	--	0
Biological process	GO:0034661	ncRNA catabolic process	2/1312	0.538111	2	novel.1560;EGP17014	novel.1560	1	EGP17014	1
Biological process	GO:0035065	regulation of histone acetylation	2/1312	0.538111	2	EGP13379;EGP20291	EGP13379	1	EGP20291	1
Biological process	GO:0045037	protein import into chloroplast stroma	2/1312	0.538111	2	EGP16251;EGP18890	EGP16251	1	EGP18890	1
Biological process	GO:0045839	negative regulation of mitotic nuclear division	2/1312	0.538111	2	novel.2248;EGP13377	novel.2248	1	EGP13377	1
Biological process	GO:0046838	phosphorylated carbohydrate dephosphorylation	2/1312	0.538111	2	EGP19170;EGP12460	--	0	EGP19170;EGP12460	2
Biological process	GO:0048639	positive regulation of developmental growth	2/1312	0.538111	2	EGP07168;EGP20751	EGP07168	1	EGP20751	1
Biological process	GO:0051050	positive regulation of transport	2/1312	0.538111	2	EGP00884;EGP12788	EGP12788	1	EGP00884	1
Biological process	GO:1901983	regulation of protein acetylation	2/1312	0.538111	2	EGP13379;EGP20291	EGP13379	1	EGP20291	1
Biological process	GO:2000756	regulation of peptidyl-lysine acetylation	2/1312	0.538111	2	EGP13379;EGP20291	EGP13379	1	EGP20291	1
Biological process	GO:0042273	ribosomal large subunit biogenesis	6/1312	0.538833	6	EGP15893;novel.1584;EGP34474;novel.1605;EGP30198;EGP30199	EGP15893	1	novel.1584;EGP34474;novel.1605;EGP30198;EGP30199	5
Biological process	GO:0055067	monovalent inorganic cation homeostasis	6/1312	0.538833	6	EGP27346;EGP06737;EGP04891;EGP24990;novel.1053;EGP21127	EGP24990;EGP21127	2	EGP27346;EGP06737;EGP04891;novel.1053	4
Biological process	GO:0000731	DNA synthesis involved in DNA repair	1/1312	0.540712	1	EGP25428	EGP25428	1	--	0
Biological process	GO:0005987	sucrose catabolic process	1/1312	0.540712	1	EGP04011	--	0	EGP04011	1
Biological process	GO:0006021	inositol biosynthetic process	1/1312	0.540712	1	EGP12460	--	0	EGP12460	1
Biological process	GO:0006072	glycerol-3-phosphate metabolic process	1/1312	0.540712	1	EGP09193	EGP09193	1	--	0
Biological process	GO:0006521	regulation of cellular amino acid metabolic process	1/1312	0.540712	1	EGP27512	EGP27512	1	--	0
Biological process	GO:0006572	tyrosine catabolic process	1/1312	0.540712	1	EGP00684	EGP00684	1	--	0
Biological process	GO:0007584	response to nutrient	1/1312	0.540712	1	EGP31080	--	0	EGP31080	1
Biological process	GO:0009211	pyrimidine deoxyribonucleoside triphosphate metabolic process	1/1312	0.540712	1	EGP13754	EGP13754	1	--	0
Biological process	GO:0009554	megasporogenesis	1/1312	0.540712	1	EGP27167	EGP27167	1	--	0
Biological process	GO:0009805	coumarin biosynthetic process	1/1312	0.540712	1	EGP32252	EGP32252	1	--	0
Biological process	GO:0010100	negative regulation of photomorphogenesis	1/1312	0.540712	1	EGP15862	--	0	EGP15862	1
Biological process	GO:0010113	negative regulation of systemic acquired resistance	1/1312	0.540712	1	EGP22202	EGP22202	1	--	0
Biological process	GO:0010117	photoprotection	1/1312	0.540712	1	EGP28691	EGP28691	1	--	0
Biological process	GO:0010199	organ boundary specification between lateral organs and the meristem	1/1312	0.540712	1	EGP13046	--	0	EGP13046	1
Biological process	GO:0010272	response to silver ion	1/1312	0.540712	1	EGP20751	--	0	EGP20751	1
Biological process	GO:0031398	positive regulation of protein ubiquitination	1/1312	0.540712	1	EGP31804	--	0	EGP31804	1
Biological process	GO:0031930	mitochondria-nucleus signaling pathway	1/1312	0.540712	1	EGP13992	--	0	EGP13992	1
Biological process	GO:0033238	regulation of cellular amine metabolic process	1/1312	0.540712	1	EGP27512	EGP27512	1	--	0
Biological process	GO:0042547	cell wall modification involved in multidimensional cell growth	1/1312	0.540712	1	EGP11626	--	0	EGP11626	1
Biological process	GO:0046386	deoxyribose phosphate catabolic process	1/1312	0.540712	1	EGP13754	EGP13754	1	--	0
Biological process	GO:0046835	carbohydrate phosphorylation	1/1312	0.540712	1	EGP10869	EGP10869	1	--	0
Biological process	GO:0048446	petal morphogenesis	1/1312	0.540712	1	EGP06308	--	0	EGP06308	1
Biological process	GO:0048829	root cap development	1/1312	0.540712	1	EGP33452	--	0	EGP33452	1
Biological process	GO:0048871	multicellular organismal homeostasis	1/1312	0.540712	1	EGP02631	--	0	EGP02631	1
Biological process	GO:0051348	negative regulation of transferase activity	1/1312	0.540712	1	EGP12517	--	0	EGP12517	1
Biological process	GO:0051703	biological process involved in intraspecies interaction between organisms	1/1312	0.540712	1	EGP28230	EGP28230	1	--	0
Biological process	GO:0052646	alditol phosphate metabolic process	1/1312	0.540712	1	EGP09193	EGP09193	1	--	0
Biological process	GO:0071217	cellular response to external biotic stimulus	1/1312	0.540712	1	EGP20751	--	0	EGP20751	1
Biological process	GO:1901528	hydrogen peroxide mediated signaling pathway involved in stomatal movement	1/1312	0.540712	1	novel.2409	--	0	novel.2409	1
Biological process	GO:1901658	glycosyl compound catabolic process	1/1312	0.540712	1	EGP21563	EGP21563	1	--	0
Biological process	GO:1901880	negative regulation of protein depolymerization	1/1312	0.540712	1	EGP17263	EGP17263	1	--	0
Biological process	GO:1902289	negative regulation of defense response to oomycetes	1/1312	0.540712	1	EGP22202	EGP22202	1	--	0
Biological process	GO:1903322	positive regulation of protein modification by small protein conjugation or removal	1/1312	0.540712	1	EGP31804	--	0	EGP31804	1
Biological process	GO:1901568	fatty acid derivative metabolic process	6/1312	0.550335	6	EGP21416;EGP08904;EGP02677;EGP25937;EGP23937;EGP21415	EGP21416;EGP02677;EGP25937;EGP21415	4	EGP08904;EGP23937	2
Biological process	GO:0036503	ERAD pathway	5/1312	0.55067	5	EGP10536;EGP09622;EGP08904;EGP23937;novel.857	EGP10536;EGP09622;novel.857	3	EGP08904;EGP23937	2
Biological process	GO:0009877	nodulation	4/1312	0.551653	4	EGP25207;EGP02801;EGP29761;EGP09638	EGP25207;EGP29761;EGP09638	3	EGP02801	1
Biological process	GO:0001708	cell fate specification	3/1312	0.553864	3	EGP21679;EGP13450;EGP32219	EGP21679;EGP13450;EGP32219	3	--	0
Biological process	GO:0034293	sexual sporulation	3/1312	0.553864	3	EGP08897;EGP20726;EGP27167	EGP08897;EGP20726;EGP27167	3	--	0
Biological process	GO:0043934	sporulation	3/1312	0.553864	3	EGP08897;EGP20726;EGP27167	EGP08897;EGP20726;EGP27167	3	--	0
Biological process	GO:0045036	protein targeting to chloroplast	3/1312	0.553864	3	EGP33185;EGP16251;EGP18890	EGP33185;EGP16251	2	EGP18890	1
Biological process	GO:0048236	plant-type sporogenesis	3/1312	0.553864	3	EGP08897;EGP20726;EGP27167	EGP08897;EGP20726;EGP27167	3	--	0
Biological process	GO:0051260	protein homooligomerization	3/1312	0.553864	3	EGP02591;EGP10851;EGP18457	EGP02591;EGP18457	2	EGP10851	1
Biological process	GO:0052545	callose localization	3/1312	0.553864	3	EGP16108;novel.2410;EGP16106	novel.2410	1	EGP16108;EGP16106	2
Biological process	GO:0060341	regulation of cellular localization	3/1312	0.553864	3	EGP14030;EGP02878;EGP02877	EGP14030;EGP02878;EGP02877	3	--	0
Biological process	GO:0072596	establishment of protein localization to chloroplast	3/1312	0.553864	3	EGP33185;EGP16251;EGP18890	EGP33185;EGP16251	2	EGP18890	1
Biological process	GO:1903338	regulation of cell wall organization or biogenesis	3/1312	0.553864	3	EGP14030;EGP06849;EGP09347	EGP14030;EGP06849;EGP09347	3	--	0
Biological process	GO:2001252	positive regulation of chromosome organization	3/1312	0.553864	3	EGP13379;EGP31804;EGP20291	EGP13379	1	EGP31804;EGP20291	2
Biological process	GO:0006636	unsaturated fatty acid biosynthetic process	2/1312	0.558813	2	EGP08435;EGP31080	EGP08435	1	EGP31080	1
Biological process	GO:0009962	regulation of flavonoid biosynthetic process	2/1312	0.558813	2	EGP21874;EGP16978	EGP21874;EGP16978	2	--	0
Biological process	GO:0030307	positive regulation of cell growth	2/1312	0.558813	2	EGP01384;EGP20751	--	0	EGP01384;EGP20751	2
Biological process	GO:0033559	unsaturated fatty acid metabolic process	2/1312	0.558813	2	EGP08435;EGP31080	EGP08435	1	EGP31080	1
Biological process	GO:1901001	negative regulation of response to salt stress	2/1312	0.558813	2	EGP07168;EGP28453	EGP07168	1	EGP28453	1
Biological process	GO:0033014	tetrapyrrole biosynthetic process	8/1312	0.560494	8	EGP26723;EGP15862;EGP24326;EGP21306;EGP09200;EGP08909;EGP30343;EGP33822	EGP26723;EGP21306;EGP09200;EGP08909;EGP30343;EGP33822	6	EGP15862;EGP24326	2
Biological process	GO:0051607	defense response to virus	8/1312	0.560494	8	EGP16102;EGP19307;EGP16100;EGP25447;EGP28511;EGP28509;EGP19302;EGP07024	EGP19307;EGP16100;EGP19302;EGP07024	4	EGP16102;EGP25447;EGP28511;EGP28509	4
Biological process	GO:0140546	defense response to symbiont	8/1312	0.560494	8	EGP16102;EGP19307;EGP16100;EGP25447;EGP28511;EGP28509;EGP19302;EGP07024	EGP19307;EGP16100;EGP19302;EGP07024	4	EGP16102;EGP25447;EGP28511;EGP28509	4
Biological process	GO:0071214	cellular response to abiotic stimulus	16/1312	0.562829	16	EGP00995;EGP19061;EGP05703;EGP29663;EGP30715;EGP15862;EGP26198;EGP30372;EGP26196;EGP21891;EGP21200;novel.2235;EGP21908;EGP20185;EGP33822;EGP26512	EGP00995;EGP19061;EGP29663;EGP26198;EGP26196;EGP21891;EGP21908;EGP33822;EGP26512	9	EGP05703;EGP30715;EGP15862;EGP30372;EGP21200;novel.2235;EGP20185	7
Biological process	GO:0104004	cellular response to environmental stimulus	16/1312	0.562829	16	EGP00995;EGP19061;EGP05703;EGP29663;EGP30715;EGP15862;EGP26198;EGP30372;EGP26196;EGP21891;EGP21200;novel.2235;EGP21908;EGP20185;EGP33822;EGP26512	EGP00995;EGP19061;EGP29663;EGP26198;EGP26196;EGP21891;EGP21908;EGP33822;EGP26512	9	EGP05703;EGP30715;EGP15862;EGP30372;EGP21200;novel.2235;EGP20185	7
Biological process	GO:0051093	negative regulation of developmental process	12/1312	0.568909	12	EGP30387;EGP15862;EGP29927;EGP30362;EGP25915;EGP13201;EGP13860;novel.2165;EGP14515;EGP08799;EGP21903;novel.460	EGP30387;EGP29927;EGP30362;novel.2165;EGP08799;EGP21903;novel.460	7	EGP15862;EGP25915;EGP13201;EGP13860;EGP14515	5
Biological process	GO:0051049	regulation of transport	11/1312	0.568949	11	EGP19886;EGP00884;EGP02699;EGP29902;EGP30794;EGP12788;EGP31485;EGP19614;EGP01682;EGP27005;EGP19721	EGP19886;EGP02699;EGP29902;EGP30794;EGP12788;EGP31485;EGP19614;EGP01682;EGP27005;EGP19721	10	EGP00884	1
Biological process	GO:0009895	negative regulation of catabolic process	3/1312	0.570074	3	EGP21890;EGP22444;EGP27814	EGP21890;EGP22444;EGP27814	3	--	0
Biological process	GO:0043647	inositol phosphate metabolic process	3/1312	0.570074	3	EGP19170;EGP10869;EGP12460	EGP10869	1	EGP19170;EGP12460	2
Biological process	GO:0006545	glycine biosynthetic process	1/1312	0.572087	1	EGP09532	EGP09532	1	--	0
Biological process	GO:0006620	posttranslational protein targeting to endoplasmic reticulum membrane	1/1312	0.572087	1	EGP32463	--	0	EGP32463	1
Biological process	GO:0009143	nucleoside triphosphate catabolic process	1/1312	0.572087	1	EGP13754	EGP13754	1	--	0
Biological process	GO:0009204	deoxyribonucleoside triphosphate catabolic process	1/1312	0.572087	1	EGP13754	EGP13754	1	--	0
Biological process	GO:0009219	pyrimidine deoxyribonucleotide metabolic process	1/1312	0.572087	1	EGP13754	EGP13754	1	--	0
Biological process	GO:0009228	thiamine biosynthetic process	1/1312	0.572087	1	EGP17030	--	0	EGP17030	1
Biological process	GO:0009264	deoxyribonucleotide catabolic process	1/1312	0.572087	1	EGP13754	EGP13754	1	--	0
Biological process	GO:0009403	toxin biosynthetic process	1/1312	0.572087	1	EGP30701	--	0	EGP30701	1
Biological process	GO:0009405	pathogenesis	1/1312	0.572087	1	EGP15057	EGP15057	1	--	0
Biological process	GO:0009804	coumarin metabolic process	1/1312	0.572087	1	EGP32252	EGP32252	1	--	0
Biological process	GO:0010439	regulation of glucosinolate biosynthetic process	1/1312	0.572087	1	EGP16209	--	0	EGP16209	1
Biological process	GO:0010569	regulation of double-strand break repair via homologous recombination	1/1312	0.572087	1	EGP15680	EGP15680	1	--	0
Biological process	GO:0015804	neutral amino acid transport	1/1312	0.572087	1	EGP31781	--	0	EGP31781	1
Biological process	GO:0015840	urea transport	1/1312	0.572087	1	EGP21615	--	0	EGP21615	1
Biological process	GO:0016574	histone ubiquitination	1/1312	0.572087	1	EGP31804	--	0	EGP31804	1
Biological process	GO:0018026	peptidyl-lysine monomethylation	1/1312	0.572087	1	EGP30697	EGP30697	1	--	0
Biological process	GO:0019673	GDP-mannose metabolic process	1/1312	0.572087	1	EGP30944	EGP30944	1	--	0
Biological process	GO:0019755	one-carbon compound transport	1/1312	0.572087	1	EGP21615	--	0	EGP21615	1
Biological process	GO:0030837	negative regulation of actin filament polymerization	1/1312	0.572087	1	EGP17263	EGP17263	1	--	0
Biological process	GO:0031221	arabinan metabolic process	1/1312	0.572087	1	EGP32972	--	0	EGP32972	1
Biological process	GO:0031222	arabinan catabolic process	1/1312	0.572087	1	EGP32972	--	0	EGP32972	1
Biological process	GO:0042724	thiamine-containing compound biosynthetic process	1/1312	0.572087	1	EGP17030	--	0	EGP17030	1
Biological process	GO:0045337	farnesyl diphosphate biosynthetic process	1/1312	0.572087	1	EGP28582	--	0	EGP28582	1
Biological process	GO:0046473	phosphatidic acid metabolic process	1/1312	0.572087	1	EGP29483	EGP29483	1	--	0
Biological process	GO:0051574	positive regulation of histone H3-K9 methylation	1/1312	0.572087	1	EGP13379	EGP13379	1	--	0
Biological process	GO:0052314	phytoalexin metabolic process	1/1312	0.572087	1	EGP30701	--	0	EGP30701	1
Biological process	GO:0052315	phytoalexin biosynthetic process	1/1312	0.572087	1	EGP30701	--	0	EGP30701	1
Biological process	GO:0071586	CAAX-box protein processing	1/1312	0.572087	1	EGP21961	EGP21961	1	--	0
Biological process	GO:0080120	CAAX-box protein maturation	1/1312	0.572087	1	EGP21961	EGP21961	1	--	0
Biological process	GO:1900109	regulation of histone H3-K9 dimethylation	1/1312	0.572087	1	EGP13379	EGP13379	1	--	0
Biological process	GO:1902170	cellular response to reactive nitrogen species	1/1312	0.572087	1	EGP01662	EGP01662	1	--	0
Biological process	GO:1902584	positive regulation of response to water deprivation	1/1312	0.572087	1	EGP22548	EGP22548	1	--	0
Biological process	GO:0055046	microgametogenesis	5/1312	0.575441	5	EGP13379;EGP02677;EGP10076;EGP15718;EGP31362	EGP13379;EGP02677;EGP15718	3	EGP10076;EGP31362	2
Biological process	GO:0007140	male meiotic nuclear division	2/1312	0.578844	2	EGP13379;EGP17260	EGP13379;EGP17260	2	--	0
Biological process	GO:0010022	meristem determinacy	2/1312	0.578844	2	EGP25915;EGP30679	--	0	EGP25915;EGP30679	2
Biological process	GO:1902456	regulation of stomatal opening	2/1312	0.578844	2	EGP00176;EGP00889	--	0	EGP00176;EGP00889	2
Biological process	GO:0006935	chemotaxis	4/1312	0.57937	4	EGP12758;EGP12757;EGP18133;novel.1571	EGP12758;EGP12757;EGP18133;novel.1571	4	--	0
Biological process	GO:0010183	pollen tube guidance	4/1312	0.57937	4	EGP12758;EGP12757;EGP18133;novel.1571	EGP12758;EGP12757;EGP18133;novel.1571	4	--	0
Biological process	GO:0042330	taxis	4/1312	0.57937	4	EGP12758;EGP12757;EGP18133;novel.1571	EGP12758;EGP12757;EGP18133;novel.1571	4	--	0
Biological process	GO:0050918	positive chemotaxis	4/1312	0.57937	4	EGP12758;EGP12757;EGP18133;novel.1571	EGP12758;EGP12757;EGP18133;novel.1571	4	--	0
Biological process	GO:1900864	mitochondrial RNA modification	4/1312	0.57937	4	EGP15841;EGP15874;EGP15777;novel.2591	EGP15841;EGP15874;EGP15777;novel.2591	4	--	0
Biological process	GO:2000070	regulation of response to water deprivation	4/1312	0.57937	4	EGP26291;EGP16121;EGP27512;EGP22548	EGP26291;EGP27512;EGP22548	3	EGP16121	1
Biological process	GO:0007276	gamete generation	6/1312	0.584026	6	EGP13379;EGP02677;EGP10076;EGP15718;EGP17260;EGP31362	EGP13379;EGP02677;EGP15718;EGP17260	4	EGP10076;EGP31362	2
Biological process	GO:0006515	protein quality control for misfolded or incompletely synthesized proteins	3/1312	0.585914	3	EGP22035;EGP10536;novel.857	EGP22035;EGP10536;novel.857	3	--	0
Biological process	GO:0033037	polysaccharide localization	3/1312	0.585914	3	EGP16108;novel.2410;EGP16106	novel.2410	1	EGP16108;EGP16106	2
Biological process	GO:0042435	indole-containing compound biosynthetic process	3/1312	0.585914	3	EGP16108;novel.2410;EGP16106	novel.2410	1	EGP16108;EGP16106	2
Biological process	GO:0048598	embryonic morphogenesis	3/1312	0.585914	3	EGP13221;EGP26239;EGP33452	EGP13221;EGP26239	2	EGP33452	1
Biological process	GO:0072598	protein localization to chloroplast	3/1312	0.585914	3	EGP33185;EGP16251;EGP18890	EGP33185;EGP16251	2	EGP18890	1
Biological process	GO:0010564	regulation of cell cycle process	9/1312	0.587656	9	novel.2248;EGP13379;EGP31754;EGP10090;EGP13377;EGP30715;EGP02878;EGP02877;EGP20291	novel.2248;EGP13379;EGP31754;EGP10090;EGP02878;EGP02877	6	EGP13377;EGP30715;EGP20291	3
Biological process	GO:0007017	microtubule-based process	17/1312	0.589921	17	EGP18192;EGP18770;EGP03122;EGP10536;EGP28711;EGP07037;EGP01400;EGP30956;EGP04165;EGP18310;EGP20726;EGP13706;EGP01402;EGP01401;EGP00141;EGP29257;novel.857	EGP10536;EGP28711;EGP07037;EGP01400;EGP30956;EGP20726;EGP13706;EGP01402;EGP01401;EGP00141;novel.857	11	EGP18192;EGP18770;EGP03122;EGP04165;EGP18310;EGP29257	6
Biological process	GO:0009756	carbohydrate mediated signaling	4/1312	0.592855	4	EGP13468;EGP13641;EGP04917;EGP18890	EGP13468	1	EGP13641;EGP04917;EGP18890	3
Biological process	GO:0010182	sugar mediated signaling pathway	4/1312	0.592855	4	EGP13468;EGP13641;EGP04917;EGP18890	EGP13468	1	EGP13641;EGP04917;EGP18890	3
Biological process	GO:0010193	response to ozone	4/1312	0.592855	4	EGP02984;EGP11081;EGP21008;EGP18717	EGP02984	1	EGP11081;EGP21008;EGP18717	3
Biological process	GO:0010380	regulation of chlorophyll biosynthetic process	4/1312	0.592855	4	EGP24326;EGP21306;EGP09200;EGP08909	EGP21306;EGP09200;EGP08909	3	EGP24326	1
Biological process	GO:0010948	negative regulation of cell cycle process	4/1312	0.592855	4	novel.2248;EGP10090;EGP13377;EGP30715	novel.2248;EGP10090	2	EGP13377;EGP30715	2
Biological process	GO:0032940	secretion by cell	6/1312	0.594965	6	EGP02699;EGP14030;EGP31804;EGP00220;EGP16759;EGP32367	EGP02699;EGP14030;EGP00220;EGP16759	4	EGP31804;EGP32367	2
Biological process	GO:0006071	glycerol metabolic process	2/1312	0.598198	2	EGP03182;EGP13773	EGP03182;EGP13773	2	--	0
Biological process	GO:0007052	mitotic spindle organization	2/1312	0.598198	2	EGP10536;novel.857	EGP10536;novel.857	2	--	0
Biological process	GO:0019400	alditol metabolic process	2/1312	0.598198	2	EGP03182;EGP13773	EGP03182;EGP13773	2	--	0
Biological process	GO:1902850	microtubule cytoskeleton organization involved in mitosis	2/1312	0.598198	2	EGP10536;novel.857	EGP10536;novel.857	2	--	0
Biological process	GO:0007346	regulation of mitotic cell cycle	5/1312	0.599474	5	novel.2248;EGP10090;EGP13377;EGP30715;EGP20714	novel.2248;EGP10090	2	EGP13377;EGP30715;EGP20714	3
Biological process	GO:0000393	spliceosomal conformational changes to generate catalytic conformation	1/1312	0.60132	1	EGP28117	EGP28117	1	--	0
Biological process	GO:0005992	trehalose biosynthetic process	1/1312	0.60132	1	EGP28121	--	0	EGP28121	1
Biological process	GO:0006772	thiamine metabolic process	1/1312	0.60132	1	EGP17030	--	0	EGP17030	1
Biological process	GO:0010019	chloroplast-nucleus signaling pathway	1/1312	0.60132	1	EGP33822	EGP33822	1	--	0
Biological process	GO:0010065	primary meristem tissue development	1/1312	0.60132	1	EGP28433	--	0	EGP28433	1
Biological process	GO:0010072	primary shoot apical meristem specification	1/1312	0.60132	1	EGP25884	EGP25884	1	--	0
Biological process	GO:0010093	specification of floral organ identity	1/1312	0.60132	1	EGP31343	EGP31343	1	--	0
Biological process	GO:0010246	rhamnogalacturonan I biosynthetic process	1/1312	0.60132	1	EGP21950	--	0	EGP21950	1
Biological process	GO:0019374	galactolipid metabolic process	1/1312	0.60132	1	EGP02482	--	0	EGP02482	1
Biological process	GO:0030030	cell projection organization	1/1312	0.60132	1	EGP13706	EGP13706	1	--	0
Biological process	GO:0030031	cell projection assembly	1/1312	0.60132	1	EGP13706	EGP13706	1	--	0
Biological process	GO:0031333	negative regulation of protein-containing complex assembly	1/1312	0.60132	1	EGP17263	EGP17263	1	--	0
Biological process	GO:0032272	negative regulation of protein polymerization	1/1312	0.60132	1	EGP17263	EGP17263	1	--	0
Biological process	GO:0034629	cellular protein-containing complex localization	1/1312	0.60132	1	EGP14030	EGP14030	1	--	0
Biological process	GO:0034644	cellular response to UV	1/1312	0.60132	1	EGP33822	EGP33822	1	--	0
Biological process	GO:0035435	phosphate ion transmembrane transport	1/1312	0.60132	1	EGP24154	EGP24154	1	--	0
Biological process	GO:0042723	thiamine-containing compound metabolic process	1/1312	0.60132	1	EGP17030	--	0	EGP17030	1
Biological process	GO:0043242	negative regulation of protein-containing complex disassembly	1/1312	0.60132	1	EGP17263	EGP17263	1	--	0
Biological process	GO:0044000	movement in host	1/1312	0.60132	1	EGP16285	EGP16285	1	--	0
Biological process	GO:0046352	disaccharide catabolic process	1/1312	0.60132	1	EGP04011	--	0	EGP04011	1
Biological process	GO:0046578	regulation of Ras protein signal transduction	1/1312	0.60132	1	EGP28230	EGP28230	1	--	0
Biological process	GO:0046739	transport of virus in multicellular host	1/1312	0.60132	1	EGP16285	EGP16285	1	--	0
Biological process	GO:0048658	anther wall tapetum development	1/1312	0.60132	1	EGP30584	EGP30584	1	--	0
Biological process	GO:0048766	root hair initiation	1/1312	0.60132	1	EGP11523	--	0	EGP11523	1
Biological process	GO:0051056	regulation of small GTPase mediated signal transduction	1/1312	0.60132	1	EGP28230	EGP28230	1	--	0
Biological process	GO:0051214	RNAi-mediated antiviral immunity against RNA virus	1/1312	0.60132	1	EGP07024	EGP07024	1	--	0
Biological process	GO:0051643	endoplasmic reticulum localization	1/1312	0.60132	1	EGP04330	EGP04330	1	--	0
Biological process	GO:0052126	movement in host environment	1/1312	0.60132	1	EGP16285	EGP16285	1	--	0
Biological process	GO:0061817	endoplasmic reticulum-plasma membrane tethering	1/1312	0.60132	1	EGP04330	EGP04330	1	--	0
Biological process	GO:0071452	cellular response to singlet oxygen	1/1312	0.60132	1	EGP29598	EGP29598	1	--	0
Biological process	GO:0080187	floral organ senescence	1/1312	0.60132	1	EGP16353	EGP16353	1	--	0
Biological process	GO:0090158	endoplasmic reticulum membrane organization	1/1312	0.60132	1	EGP04330	EGP04330	1	--	0
Biological process	GO:0090701	specification of plant organ identity	1/1312	0.60132	1	EGP31343	EGP31343	1	--	0
Biological process	GO:1901879	regulation of protein depolymerization	1/1312	0.60132	1	EGP17263	EGP17263	1	--	0
Biological process	GO:2000779	regulation of double-strand break repair	1/1312	0.60132	1	EGP15680	EGP15680	1	--	0
Biological process	GO:0032508	DNA duplex unwinding	3/1312	0.601376	3	EGP20739;novel.1855;EGP15437	novel.1855	1	EGP20739;EGP15437	2
Biological process	GO:0071462	cellular response to water stimulus	3/1312	0.601376	3	EGP26198;EGP26196;EGP26512	EGP26198;EGP26196;EGP26512	3	--	0
Biological process	GO:0009116	nucleoside metabolic process	4/1312	0.606079	4	EGP21563;EGP04894;EGP23939;EGP04413	EGP21563;EGP04894;EGP23939;EGP04413	4	--	0
Biological process	GO:0002831	regulation of response to biotic stimulus	21/1312	0.607327	21	EGP21277;novel.646;EGP10406;EGP25999;EGP22202;EGP12857;EGP00626;novel.775;novel.993;EGP29761;EGP26278;EGP07261;EGP32309;EGP32367;EGP32311;EGP20781;novel.2165;EGP31080;novel.469;novel.460;EGP16389	novel.646;EGP10406;EGP25999;EGP22202;EGP12857;EGP00626;novel.775;novel.993;EGP29761;EGP26278;EGP07261;EGP32309;EGP20781;novel.2165;novel.469;novel.460;EGP16389	17	EGP21277;EGP32367;EGP32311;EGP31080	4
Biological process	GO:0009967	positive regulation of signal transduction	8/1312	0.608154	8	EGP28453;EGP28524;EGP14278;EGP00669;EGP15832;EGP00176;EGP29483;EGP00889	EGP14278;EGP00669;EGP29483	3	EGP28453;EGP28524;EGP15832;EGP00176;EGP00889	5
Biological process	GO:0009743	response to carbohydrate	11/1312	0.609471	11	EGP13468;EGP13641;EGP15957;EGP07371;EGP21381;EGP04917;EGP14298;EGP33166;EGP18890;EGP09489;EGP02465	EGP13468;EGP07371;EGP21381;EGP14298;EGP33166	5	EGP13641;EGP15957;EGP04917;EGP18890;EGP09489;EGP02465	6
Biological process	GO:0009789	positive regulation of abscisic acid-activated signaling pathway	5/1312	0.611198	5	EGP14278;EGP15832;EGP00176;EGP29483;EGP00889	EGP14278;EGP29483	2	EGP15832;EGP00176;EGP00889	3
Biological process	GO:0001558	regulation of cell growth	9/1312	0.614131	9	EGP31526;EGP01384;EGP28191;EGP18133;EGP20751;EGP00220;EGP10076;EGP20060;EGP31362	EGP28191;EGP18133;EGP00220;EGP20060	4	EGP31526;EGP01384;EGP20751;EGP10076;EGP31362	5
Biological process	GO:0032504	multicellular organism reproduction	17/1312	0.615772	17	EGP13379;EGP28574;EGP12552;EGP02677;EGP08711;EGP02878;EGP02877;EGP20751;EGP10076;EGP21950;EGP31455;EGP15718;EGP31068;EGP05747;EGP10851;EGP17260;EGP31362	EGP13379;EGP28574;EGP12552;EGP02677;EGP08711;EGP02878;EGP02877;EGP31455;EGP15718;EGP31068;EGP17260	11	EGP20751;EGP10076;EGP21950;EGP05747;EGP10851;EGP31362	6
Biological process	GO:0002238	response to molecule of fungal origin	3/1312	0.616452	3	EGP07113;EGP32252;EGP09360	EGP32252;EGP09360	2	EGP07113	1
Biological process	GO:0032392	DNA geometric change	3/1312	0.616452	3	EGP20739;novel.1855;EGP15437	novel.1855	1	EGP20739;EGP15437	2
Biological process	GO:0000413	protein peptidyl-prolyl isomerization	2/1312	0.616876	2	EGP13100;EGP33440	EGP13100;EGP33440	2	--	0
Biological process	GO:0006534	cysteine metabolic process	2/1312	0.616876	2	EGP05229;EGP30646	EGP05229	1	EGP30646	1
Biological process	GO:0007093	mitotic cell cycle checkpoint	2/1312	0.616876	2	EGP10090;EGP30715	EGP10090	1	EGP30715	1
Biological process	GO:0042278	purine nucleoside metabolic process	2/1312	0.616876	2	EGP21563;EGP04413	EGP21563;EGP04413	2	--	0
Biological process	GO:0043069	negative regulation of programmed cell death	2/1312	0.616876	2	EGP09197;EGP26278	EGP09197;EGP26278	2	--	0
Biological process	GO:0046189	phenol-containing compound biosynthetic process	2/1312	0.616876	2	EGP30521;EGP10406	EGP10406	1	EGP30521	1
Biological process	GO:1990069	stomatal opening	2/1312	0.616876	2	EGP00176;EGP00889	--	0	EGP00176;EGP00889	2
Biological process	GO:0009741	response to brassinosteroid	8/1312	0.617362	8	EGP26007;EGP00302;EGP18377;EGP16572;novel.1818;EGP00531;EGP08799;EGP31050	EGP26007;EGP18377;EGP16572;novel.1818;EGP00531;EGP08799	6	EGP00302;EGP31050	2
Biological process	GO:0023056	positive regulation of signaling	8/1312	0.617362	8	EGP28453;EGP28524;EGP14278;EGP00669;EGP15832;EGP00176;EGP29483;EGP00889	EGP14278;EGP00669;EGP29483	3	EGP28453;EGP28524;EGP15832;EGP00176;EGP00889	5
Biological process	GO:0009225	nucleotide-sugar metabolic process	4/1312	0.619039	4	EGP08658;EGP30944;EGP10319;EGP21838	EGP08658;EGP30944;EGP10319;EGP21838	4	--	0
Biological process	GO:0090056	regulation of chlorophyll metabolic process	4/1312	0.619039	4	EGP24326;EGP21306;EGP09200;EGP08909	EGP21306;EGP09200;EGP08909	3	EGP24326	1
Biological process	GO:1901463	regulation of tetrapyrrole biosynthetic process	4/1312	0.619039	4	EGP24326;EGP21306;EGP09200;EGP08909	EGP21306;EGP09200;EGP08909	3	EGP24326	1
Biological process	GO:0048467	gynoecium development	6/1312	0.626838	6	EGP31343;EGP14253;EGP24145;EGP04733;EGP21352;EGP30679	EGP31343;EGP14253;EGP24145;EGP04733	4	EGP21352;EGP30679	2
Biological process	GO:0006465	signal peptide processing	1/1312	0.628558	1	EGP10339	EGP10339	1	--	0
Biological process	GO:0006535	cysteine biosynthetic process from serine	1/1312	0.628558	1	EGP05229	EGP05229	1	--	0
Biological process	GO:0006662	glycerol ether metabolic process	1/1312	0.628558	1	EGP26856	EGP26856	1	--	0
Biological process	GO:0006771	riboflavin metabolic process	1/1312	0.628558	1	EGP20638	--	0	EGP20638	1
Biological process	GO:0009231	riboflavin biosynthetic process	1/1312	0.628558	1	EGP20638	--	0	EGP20638	1
Biological process	GO:0009313	oligosaccharide catabolic process	1/1312	0.628558	1	EGP04011	--	0	EGP04011	1
Biological process	GO:0009394	2'-deoxyribonucleotide metabolic process	1/1312	0.628558	1	EGP13754	EGP13754	1	--	0
Biological process	GO:0009423	chorismate biosynthetic process	1/1312	0.628558	1	EGP04332	EGP04332	1	--	0
Biological process	GO:0009773	photosynthetic electron transport in photosystem I	1/1312	0.628558	1	EGP23032	EGP23032	1	--	0
Biological process	GO:0010196	nonphotochemical quenching	1/1312	0.628558	1	EGP09169	EGP09169	1	--	0
Biological process	GO:0018023	peptidyl-lysine trimethylation	1/1312	0.628558	1	EGP20291	--	0	EGP20291	1
Biological process	GO:0019692	deoxyribose phosphate metabolic process	1/1312	0.628558	1	EGP13754	EGP13754	1	--	0
Biological process	GO:0030308	negative regulation of cell growth	1/1312	0.628558	1	EGP28191	EGP28191	1	--	0
Biological process	GO:0042727	flavin-containing compound biosynthetic process	1/1312	0.628558	1	EGP20638	--	0	EGP20638	1
Biological process	GO:0042732	D-xylose metabolic process	1/1312	0.628558	1	EGP21838	EGP21838	1	--	0
Biological process	GO:0044766	multi-organism transport	1/1312	0.628558	1	EGP16285	EGP16285	1	--	0
Biological process	GO:0045912	negative regulation of carbohydrate metabolic process	1/1312	0.628558	1	EGP15957	--	0	EGP15957	1
Biological process	GO:0046794	transport of virus	1/1312	0.628558	1	EGP16285	EGP16285	1	--	0
Biological process	GO:0051289	protein homotetramerization	1/1312	0.628558	1	EGP18457	EGP18457	1	--	0
Biological process	GO:0060866	leaf abscission	1/1312	0.628558	1	EGP33662	EGP33662	1	--	0
Biological process	GO:1902579	multi-organism localization	1/1312	0.628558	1	EGP16285	EGP16285	1	--	0
Biological process	GO:1990066	energy quenching	1/1312	0.628558	1	EGP09169	EGP09169	1	--	0
Biological process	GO:0032101	regulation of response to external stimulus	21/1312	0.630267	21	EGP21277;novel.646;EGP10406;EGP25999;EGP22202;EGP12857;EGP00626;novel.775;novel.993;EGP29761;EGP26278;EGP07261;EGP32309;EGP32367;EGP32311;EGP20781;novel.2165;EGP31080;novel.469;novel.460;EGP16389	novel.646;EGP10406;EGP25999;EGP22202;EGP12857;EGP00626;novel.775;novel.993;EGP29761;EGP26278;EGP07261;EGP32309;EGP20781;novel.2165;novel.469;novel.460;EGP16389	17	EGP21277;EGP32367;EGP32311;EGP31080	4
Biological process	GO:1903046	meiotic cell cycle process	12/1312	0.630284	12	EGP13379;EGP08897;EGP31754;EGP10090;EGP30715;EGP33648;EGP02878;novel.775;EGP02877;EGP20726;EGP27167;EGP17260	EGP13379;EGP08897;EGP31754;EGP10090;EGP33648;EGP02878;novel.775;EGP02877;EGP20726;EGP27167;EGP17260	11	EGP30715	1
Biological process	GO:0006730	one-carbon metabolic process	3/1312	0.631138	3	EGP19038;novel.1884;EGP22956	EGP19038	1	novel.1884;EGP22956	2
Biological process	GO:0006760	folic acid-containing compound metabolic process	3/1312	0.631138	3	EGP19038;novel.1884;EGP22956	EGP19038	1	novel.1884;EGP22956	2
Biological process	GO:0010449	root meristem growth	3/1312	0.631138	3	EGP10076;EGP27880;EGP31362	EGP27880	1	EGP10076;EGP31362	2
Biological process	GO:0009267	cellular response to starvation	9/1312	0.631288	9	EGP25953;EGP16692;EGP01662;EGP15937;EGP02482;EGP25883;EGP09921;EGP05747;EGP16209	EGP25953;EGP16692;EGP01662;EGP15937;EGP09921	5	EGP02482;EGP25883;EGP05747;EGP16209	4
Biological process	GO:0000266	mitochondrial fission	2/1312	0.634878	2	EGP05343;EGP28004	EGP05343;EGP28004	2	--	0
Biological process	GO:0006893	Golgi to plasma membrane transport	2/1312	0.634878	2	EGP25835;EGP16759	EGP25835;EGP16759	2	--	0
Biological process	GO:0016925	protein sumoylation	2/1312	0.634878	2	EGP11089;EGP10515	EGP11089	1	EGP10515	1
Biological process	GO:0043068	positive regulation of programmed cell death	2/1312	0.634878	2	EGP05286;EGP05874	EGP05286	1	EGP05874	1
Biological process	GO:1901292	nucleoside phosphate catabolic process	2/1312	0.634878	2	EGP05874;EGP13754	EGP13754	1	EGP05874	1
Biological process	GO:0010647	positive regulation of cell communication	8/1312	0.63543	8	EGP28453;EGP28524;EGP14278;EGP00669;EGP15832;EGP00176;EGP29483;EGP00889	EGP14278;EGP00669;EGP29483	3	EGP28453;EGP28524;EGP15832;EGP00176;EGP00889	5
Biological process	GO:0046486	glycerolipid metabolic process	15/1312	0.637916	15	EGP08897;EGP13822;EGP08919;EGP06308;EGP30387;EGP19170;EGP29927;EGP05345;EGP30362;EGP03182;EGP18265;EGP29483;EGP21903;EGP31009;EGP12460	EGP08897;EGP13822;EGP30387;EGP29927;EGP30362;EGP03182;EGP29483;EGP21903;EGP31009	9	EGP08919;EGP06308;EGP19170;EGP05345;EGP18265;EGP12460	6
Biological process	GO:0002252	immune effector process	9/1312	0.639712	9	EGP16102;EGP19307;EGP16100;EGP25447;EGP28511;EGP28509;EGP19302;EGP07024;EGP31080	EGP19307;EGP16100;EGP19302;EGP07024	4	EGP16102;EGP25447;EGP28511;EGP28509;EGP31080	5
Biological process	GO:0051336	regulation of hydrolase activity	10/1312	0.64393	10	EGP28230;EGP17805;EGP16278;EGP18709;EGP11282;EGP13603;EGP26639;EGP16279;EGP28526;EGP28539	EGP28230;EGP16278;EGP18709;EGP13603;EGP16279;EGP28526;EGP28539	7	EGP17805;EGP11282;EGP26639	3
Biological process	GO:0009955	adaxial/abaxial pattern specification	4/1312	0.64414	4	EGP14253;EGP20751;EGP24145;EGP20060	EGP14253;EGP24145;EGP20060	3	EGP20751	1
Biological process	GO:1901401	regulation of tetrapyrrole metabolic process	4/1312	0.64414	4	EGP24326;EGP21306;EGP09200;EGP08909	EGP21306;EGP09200;EGP08909	3	EGP24326	1
Biological process	GO:0048532	anatomical structure arrangement	5/1312	0.64514	5	EGP25884;EGP10512;EGP30679;EGP20291;EGP31050	EGP25884;EGP10512	2	EGP30679;EGP20291;EGP31050	3
Biological process	GO:0065002	intracellular protein transmembrane transport	5/1312	0.64514	5	EGP32463;EGP16251;novel.1575;EGP13595;EGP18890	EGP16251	1	EGP32463;novel.1575;EGP13595;EGP18890	4
Biological process	GO:0071806	protein transmembrane transport	5/1312	0.64514	5	EGP32463;EGP16251;novel.1575;EGP13595;EGP18890	EGP16251	1	EGP32463;novel.1575;EGP13595;EGP18890	4
Biological process	GO:0006099	tricarboxylic acid cycle	3/1312	0.645428	3	EGP10670;EGP16251;EGP16604	EGP10670;EGP16251;EGP16604	3	--	0
Biological process	GO:0006665	sphingolipid metabolic process	3/1312	0.645428	3	EGP12462;EGP33663;EGP26487	EGP12462;EGP33663	2	EGP26487	1
Biological process	GO:0010942	positive regulation of cell death	3/1312	0.645428	3	EGP05286;EGP02794;EGP05874	EGP05286;EGP02794	2	EGP05874	1
Biological process	GO:0047484	regulation of response to osmotic stress	6/1312	0.647258	6	EGP07168;EGP28453;EGP06849;EGP27512;EGP09347;EGP34110	EGP07168;EGP06849;EGP27512;EGP09347	4	EGP28453;EGP34110	2
Biological process	GO:0051604	protein maturation	6/1312	0.647258	6	EGP10339;EGP18973;EGP31143;EGP21961;EGP21129;EGP01578	EGP10339;EGP18973;EGP31143;EGP21961;EGP21129;EGP01578	6	--	0
Biological process	GO:0006857	oligopeptide transport	2/1312	0.65221	2	EGP13219;novel.1630	EGP13219	1	novel.1630	1
Biological process	GO:0009838	abscission	2/1312	0.65221	2	EGP33662;EGP19885	EGP33662	1	EGP19885	1
Biological process	GO:0045995	regulation of embryonic development	2/1312	0.65221	2	EGP20751;EGP31072	EGP31072	1	EGP20751	1
Biological process	GO:0006097	glyoxylate cycle	1/1312	0.653935	1	EGP10670	EGP10670	1	--	0
Biological process	GO:0006144	purine nucleobase metabolic process	1/1312	0.653935	1	EGP04894	EGP04894	1	--	0
Biological process	GO:0006814	sodium ion transport	1/1312	0.653935	1	EGP05605	--	0	EGP05605	1
Biological process	GO:0009268	response to pH	1/1312	0.653935	1	EGP15795	EGP15795	1	--	0
Biological process	GO:0009396	folic acid-containing compound biosynthetic process	1/1312	0.653935	1	EGP22956	--	0	EGP22956	1
Biological process	GO:0010225	response to UV-C	1/1312	0.653935	1	EGP33822	EGP33822	1	--	0
Biological process	GO:0019336	phenol-containing compound catabolic process	1/1312	0.653935	1	EGP13526	EGP13526	1	--	0
Biological process	GO:0032958	inositol phosphate biosynthetic process	1/1312	0.653935	1	EGP10869	EGP10869	1	--	0
Biological process	GO:0033260	nuclear DNA replication	1/1312	0.653935	1	novel.1650	novel.1650	1	--	0
Biological process	GO:0051494	negative regulation of cytoskeleton organization	1/1312	0.653935	1	EGP17263	EGP17263	1	--	0
Biological process	GO:0055069	zinc ion homeostasis	1/1312	0.653935	1	EGP21158	EGP21158	1	--	0
Biological process	GO:0090481	pyrimidine nucleotide-sugar transmembrane transport	1/1312	0.653935	1	EGP02446	EGP02446	1	--	0
Biological process	GO:0110156	methylguanosine-cap decapping	1/1312	0.653935	1	EGP33762	--	0	EGP33762	1
Biological process	GO:1902904	negative regulation of supramolecular fiber organization	1/1312	0.653935	1	EGP17263	EGP17263	1	--	0
Biological process	GO:1905615	positive regulation of developmental vegetative growth	1/1312	0.653935	1	EGP07168	EGP07168	1	--	0
Biological process	GO:2000023	regulation of lateral root development	1/1312	0.653935	1	EGP14515	--	0	EGP14515	1
Biological process	GO:1901605	alpha-amino acid metabolic process	20/1312	0.653949	20	EGP24622;EGP04665;EGP31475;EGP16108;EGP13233;EGP00684;EGP05229;EGP30646;EGP02960;EGP04894;novel.2017;EGP06849;novel.2410;EGP09532;EGP27512;EGP15762;EGP18457;EGP21129;EGP09347;EGP16106	EGP24622;EGP04665;EGP13233;EGP00684;EGP05229;EGP02960;EGP04894;EGP06849;novel.2410;EGP09532;EGP27512;EGP15762;EGP18457;EGP21129;EGP09347	15	EGP31475;EGP16108;EGP30646;novel.2017;EGP16106	5
Biological process	GO:0040011	locomotion	4/1312	0.656274	4	EGP12758;EGP12757;EGP18133;novel.1571	EGP12758;EGP12757;EGP18133;novel.1571	4	--	0
Biological process	GO:0006779	porphyrin-containing compound biosynthetic process	7/1312	0.659181	7	EGP26723;EGP15862;EGP24326;EGP21306;EGP09200;EGP08909;EGP30343	EGP26723;EGP21306;EGP09200;EGP08909;EGP30343	5	EGP15862;EGP24326	2
Biological process	GO:0006885	regulation of pH	3/1312	0.659322	3	EGP06737;EGP24990;novel.1053	EGP24990	1	EGP06737;novel.1053	2
Biological process	GO:0006898	receptor-mediated endocytosis	3/1312	0.659322	3	EGP28004;EGP06065;EGP00718	EGP28004;EGP06065	2	EGP00718	1
Biological process	GO:0042558	pteridine-containing compound metabolic process	3/1312	0.659322	3	EGP19038;novel.1884;EGP22956	EGP19038	1	novel.1884;EGP22956	2
Biological process	GO:0090329	regulation of DNA-dependent DNA replication	3/1312	0.659322	3	novel.2248;EGP13377;novel.1650	novel.2248;novel.1650	2	EGP13377	1
Biological process	GO:0051726	regulation of cell cycle	16/1312	0.66129	16	novel.2248;EGP13379;EGP31754;EGP31292;EGP10090;EGP13377;EGP30715;EGP16190;EGP28222;novel.1650;EGP11464;EGP12517;EGP02878;EGP20714;EGP02877;EGP20291	novel.2248;EGP13379;EGP31754;EGP31292;EGP10090;EGP16190;EGP28222;novel.1650;EGP11464;EGP02878;EGP02877	11	EGP13377;EGP30715;EGP12517;EGP20714;EGP20291	5
Biological process	GO:0010053	root epidermal cell differentiation	8/1312	0.661617	8	EGP05097;EGP00854;EGP13443;EGP25835;EGP00017;EGP19721;EGP14515;EGP11523	EGP05097;EGP00854;EGP13443;EGP25835;EGP00017;EGP19721	6	EGP14515;EGP11523	2
Biological process	GO:0009856	pollination	26/1312	0.662322	26	EGP30567;EGP31473;EGP12758;EGP28230;EGP28975;EGP11761;EGP30564;EGP23948;EGP31706;EGP12757;EGP28478;EGP18133;EGP06065;EGP00805;EGP04733;EGP16604;EGP02219;novel.1571;EGP02214;EGP30496;EGP03376;EGP02218;EGP28340;EGP28558;EGP30495;EGP30497	EGP12758;EGP28230;EGP12757;EGP28478;EGP18133;EGP06065;EGP00805;EGP04733;EGP16604;EGP02219;novel.1571;EGP30496;EGP02218;EGP28340;EGP28558;EGP30495;EGP30497	17	EGP30567;EGP31473;EGP28975;EGP11761;EGP30564;EGP23948;EGP31706;EGP02214;EGP03376	9
Biological process	GO:0044706	multi-multicellular organism process	26/1312	0.662322	26	EGP30567;EGP31473;EGP12758;EGP28230;EGP28975;EGP11761;EGP30564;EGP23948;EGP31706;EGP12757;EGP28478;EGP18133;EGP06065;EGP00805;EGP04733;EGP16604;EGP02219;novel.1571;EGP02214;EGP30496;EGP03376;EGP02218;EGP28340;EGP28558;EGP30495;EGP30497	EGP12758;EGP28230;EGP12757;EGP28478;EGP18133;EGP06065;EGP00805;EGP04733;EGP16604;EGP02219;novel.1571;EGP30496;EGP02218;EGP28340;EGP28558;EGP30495;EGP30497	17	EGP30567;EGP31473;EGP28975;EGP11761;EGP30564;EGP23948;EGP31706;EGP02214;EGP03376	9
Biological process	GO:0008285	negative regulation of cell population proliferation	2/1312	0.668879	2	EGP19885;novel.1412	--	0	EGP19885;novel.1412	2
Biological process	GO:0035384	thioester biosynthetic process	2/1312	0.668879	2	EGP25884;EGP24324	EGP25884	1	EGP24324	1
Biological process	GO:0042304	regulation of fatty acid biosynthetic process	2/1312	0.668879	2	EGP13860;EGP20291	--	0	EGP13860;EGP20291	2
Biological process	GO:0046246	terpene biosynthetic process	2/1312	0.668879	2	EGP07113;EGP00187	--	0	EGP07113;EGP00187	2
Biological process	GO:0046856	phosphatidylinositol dephosphorylation	2/1312	0.668879	2	EGP19170;EGP18265	--	0	EGP19170;EGP18265	2
Biological process	GO:0048508	embryonic meristem development	2/1312	0.668879	2	EGP25884;EGP28433	EGP25884	1	EGP28433	1
Biological process	GO:0071616	acyl-CoA biosynthetic process	2/1312	0.668879	2	EGP25884;EGP24324	EGP25884	1	EGP24324	1
Biological process	GO:0090068	positive regulation of cell cycle process	2/1312	0.668879	2	EGP13379;EGP20291	EGP13379	1	EGP20291	1
Biological process	GO:0010208	pollen wall assembly	3/1312	0.672817	3	EGP17155;EGP13201;EGP24496	EGP17155	1	EGP13201;EGP24496	2
Biological process	GO:0016109	tetraterpenoid biosynthetic process	3/1312	0.672817	3	EGP28582;EGP31370;EGP33822	EGP33822	1	EGP28582;EGP31370	2
Biological process	GO:0016117	carotenoid biosynthetic process	3/1312	0.672817	3	EGP28582;EGP31370;EGP33822	EGP33822	1	EGP28582;EGP31370	2
Biological process	GO:0000165	MAPK cascade	1/1312	0.677581	1	EGP00626	EGP00626	1	--	0
Biological process	GO:0009200	deoxyribonucleoside triphosphate metabolic process	1/1312	0.677581	1	EGP13754	EGP13754	1	--	0
Biological process	GO:0009864	induced systemic resistance, jasmonic acid mediated signaling pathway	1/1312	0.677581	1	EGP31080	--	0	EGP31080	1
Biological process	GO:0010395	rhamnogalacturonan I metabolic process	1/1312	0.677581	1	EGP21950	--	0	EGP21950	1
Biological process	GO:0010623	programmed cell death involved in cell development	1/1312	0.677581	1	EGP12845	EGP12845	1	--	0
Biological process	GO:0015695	organic cation transport	1/1312	0.677581	1	novel.1932	--	0	novel.1932	1
Biological process	GO:0016122	xanthophyll metabolic process	1/1312	0.677581	1	EGP31370	--	0	EGP31370	1
Biological process	GO:0030104	water homeostasis	1/1312	0.677581	1	EGP27512	EGP27512	1	--	0
Biological process	GO:0030656	regulation of vitamin metabolic process	1/1312	0.677581	1	EGP13468	EGP13468	1	--	0
Biological process	GO:0031396	regulation of protein ubiquitination	1/1312	0.677581	1	EGP31804	--	0	EGP31804	1
Biological process	GO:0042060	wound healing	1/1312	0.677581	1	EGP00995	EGP00995	1	--	0
Biological process	GO:0042753	positive regulation of circadian rhythm	1/1312	0.677581	1	novel.2235	--	0	novel.2235	1
Biological process	GO:0046417	chorismate metabolic process	1/1312	0.677581	1	EGP04332	EGP04332	1	--	0
Biological process	GO:0110154	RNA decapping	1/1312	0.677581	1	EGP33762	--	0	EGP33762	1
Biological process	GO:0120029	proton export across plasma membrane	1/1312	0.677581	1	EGP24990	EGP24990	1	--	0
Biological process	GO:1901703	protein localization involved in auxin polar transport	1/1312	0.677581	1	EGP22231	--	0	EGP22231	1
Biological process	GO:1990110	callus formation	1/1312	0.677581	1	EGP00995	EGP00995	1	--	0
Biological process	GO:0042255	ribosome assembly	4/1312	0.679694	4	novel.1605;EGP30198;EGP30199;EGP05675	--	0	novel.1605;EGP30198;EGP30199;EGP05675	4
Biological process	GO:0071322	cellular response to carbohydrate stimulus	4/1312	0.679694	4	EGP13468;EGP13641;EGP04917;EGP18890	EGP13468	1	EGP13641;EGP04917;EGP18890	3
Biological process	GO:0009649	entrainment of circadian clock	2/1312	0.684895	2	EGP24307;novel.2235	--	0	EGP24307;novel.2235	2
Biological process	GO:0010492	maintenance of shoot apical meristem identity	2/1312	0.684895	2	EGP13046;EGP20291	--	0	EGP13046;EGP20291	2
Biological process	GO:1903008	organelle disassembly	2/1312	0.684895	2	EGP10536;novel.857	EGP10536;novel.857	2	--	0
Biological process	GO:0009749	response to glucose	3/1312	0.685915	3	EGP07371;EGP14298;EGP18890	EGP07371;EGP14298	2	EGP18890	1
Biological process	GO:0009825	multidimensional cell growth	3/1312	0.685915	3	EGP10512;EGP11626;EGP10253	EGP10512;EGP10253	2	EGP11626	1
Biological process	GO:0010192	mucilage biosynthetic process	3/1312	0.685915	3	EGP07337;EGP21347;EGP21950	EGP07337	1	EGP21347;EGP21950	2
Biological process	GO:0034504	protein localization to nucleus	4/1312	0.690978	4	EGP25720;EGP18355;EGP00669;EGP31975	EGP25720;EGP18355;EGP00669	3	EGP31975	1
Biological process	GO:0009553	embryo sac development	11/1312	0.691506	11	EGP13379;EGP12758;EGP15275;EGP12757;EGP33648;EGP02878;EGP02877;novel.1605;EGP30198;EGP27167;EGP30199	EGP13379;EGP12758;EGP15275;EGP12757;EGP33648;EGP02878;EGP02877;EGP27167	8	novel.1605;EGP30198;EGP30199	3
Biological process	GO:0009064	glutamine family amino acid metabolic process	6/1312	0.695239	6	EGP04665;EGP31475;EGP02960;EGP04894;EGP27512;EGP15762	EGP04665;EGP02960;EGP04894;EGP27512;EGP15762	5	EGP31475	1
Biological process	GO:0019439	aromatic compound catabolic process	18/1312	0.696945	18	EGP24622;EGP01597;EGP05874;EGP00684;EGP13754;EGP21563;EGP16486;novel.2017;EGP33762;EGP24248;EGP18900;novel.1560;EGP31025;EGP17014;EGP13526;EGP13251;EGP33822;EGP18016	EGP24622;EGP00684;EGP13754;EGP21563;EGP16486;novel.1560;EGP13526;EGP33822	8	EGP01597;EGP05874;novel.2017;EGP33762;EGP24248;EGP18900;EGP31025;EGP17014;EGP13251;EGP18016	10
Biological process	GO:1901000	regulation of response to salt stress	5/1312	0.697405	5	EGP07168;EGP28453;EGP06849;EGP09347;EGP34110	EGP07168;EGP06849;EGP09347	3	EGP28453;EGP34110	2
Biological process	GO:0000103	sulfate assimilation	1/1312	0.699612	1	EGP30646	--	0	EGP30646	1
Biological process	GO:0005991	trehalose metabolic process	1/1312	0.699612	1	EGP28121	--	0	EGP28121	1
Biological process	GO:0006312	mitotic recombination	1/1312	0.699612	1	EGP30715	--	0	EGP30715	1
Biological process	GO:0010048	vernalization response	1/1312	0.699612	1	EGP25915	--	0	EGP25915	1
Biological process	GO:0010344	seed oilbody biogenesis	1/1312	0.699612	1	EGP31072	EGP31072	1	--	0
Biological process	GO:0010363	regulation of plant-type hypersensitive response	1/1312	0.699612	1	EGP26278	EGP26278	1	--	0
Biological process	GO:0019363	pyridine nucleotide biosynthetic process	1/1312	0.699612	1	EGP06150	EGP06150	1	--	0
Biological process	GO:0033962	P-body assembly	1/1312	0.699612	1	EGP33762	--	0	EGP33762	1
Biological process	GO:0042559	pteridine-containing compound biosynthetic process	1/1312	0.699612	1	EGP22956	--	0	EGP22956	1
Biological process	GO:0045005	DNA-dependent DNA replication maintenance of fidelity	1/1312	0.699612	1	EGP25428	EGP25428	1	--	0
Biological process	GO:0046487	glyoxylate metabolic process	1/1312	0.699612	1	EGP10670	EGP10670	1	--	0
Biological process	GO:0046513	ceramide biosynthetic process	1/1312	0.699612	1	EGP33663	EGP33663	1	--	0
Biological process	GO:0048015	phosphatidylinositol-mediated signaling	1/1312	0.699612	1	EGP22648	EGP22648	1	--	0
Biological process	GO:0048759	xylem vessel member cell differentiation	1/1312	0.699612	1	EGP14030	EGP14030	1	--	0
Biological process	GO:0052325	cell wall pectin biosynthetic process	1/1312	0.699612	1	EGP28160	EGP28160	1	--	0
Biological process	GO:0072523	purine-containing compound catabolic process	1/1312	0.699612	1	EGP21563	EGP21563	1	--	0
Biological process	GO:1903320	regulation of protein modification by small protein conjugation or removal	1/1312	0.699612	1	EGP31804	--	0	EGP31804	1
Biological process	GO:0043622	cortical microtubule organization	2/1312	0.70027	2	EGP18770;EGP03122	--	0	EGP18770;EGP03122	2
Biological process	GO:1900618	regulation of shoot system morphogenesis	2/1312	0.70027	2	EGP07168;novel.1702	EGP07168;novel.1702	2	--	0
Biological process	GO:1901371	regulation of leaf morphogenesis	2/1312	0.70027	2	EGP07168;novel.1702	EGP07168;novel.1702	2	--	0
Biological process	GO:0055072	iron ion homeostasis	4/1312	0.701976	4	EGP06058;EGP08971;EGP20714;EGP00513	EGP06058;EGP08971	2	EGP20714;EGP00513	2
Biological process	GO:0019725	cellular homeostasis	14/1312	0.704237	14	EGP06737;EGP07130;EGP18914;EGP00884;EGP06058;EGP08971;EGP24990;EGP14970;EGP12788;novel.1002;EGP30372;EGP31143;EGP15718;EGP00513	EGP07130;EGP18914;EGP06058;EGP08971;EGP24990;EGP14970;EGP12788;EGP31143;EGP15718	9	EGP06737;EGP00884;novel.1002;EGP30372;EGP00513	5
Biological process	GO:0015995	chlorophyll biosynthetic process	6/1312	0.704293	6	EGP26723;EGP15862;EGP24326;EGP21306;EGP09200;EGP08909	EGP26723;EGP21306;EGP09200;EGP08909	4	EGP15862;EGP24326	2
Biological process	GO:0070646	protein modification by small protein removal	6/1312	0.704293	6	EGP31929;EGP30764;EGP00309;EGP17335;EGP03250;novel.1173	EGP31929;EGP03250	2	EGP30764;EGP00309;EGP17335;novel.1173	4
Biological process	GO:0018958	phenol-containing compound metabolic process	5/1312	0.707194	5	EGP30521;EGP06277;EGP10406;EGP22133;EGP13526	EGP06277;EGP10406;EGP22133;EGP13526	4	EGP30521	1
Biological process	GO:0043648	dicarboxylic acid metabolic process	5/1312	0.707194	5	EGP31475;EGP04332;EGP16251;EGP02960;EGP16604	EGP04332;EGP16251;EGP02960;EGP16604	4	EGP31475	1
Biological process	GO:0000079	regulation of cyclin-dependent protein serine/threonine kinase activity	3/1312	0.710924	3	EGP28222;EGP11464;EGP12517	EGP28222;EGP11464	2	EGP12517	1
Biological process	GO:0006289	nucleotide-excision repair	3/1312	0.710924	3	EGP10090;EGP20739;EGP15437	EGP10090	1	EGP20739;EGP15437	2
Biological process	GO:0010927	cellular component assembly involved in morphogenesis	3/1312	0.710924	3	EGP17155;EGP13201;EGP24496	EGP17155	1	EGP13201;EGP24496	2
Biological process	GO:0031647	regulation of protein stability	3/1312	0.710924	3	EGP00309;EGP03250;novel.1173	EGP03250	1	EGP00309;novel.1173	2
Biological process	GO:0032989	cellular component morphogenesis	3/1312	0.710924	3	EGP17155;EGP13201;EGP24496	EGP17155	1	EGP13201;EGP24496	2
Biological process	GO:1904029	regulation of cyclin-dependent protein kinase activity	3/1312	0.710924	3	EGP28222;EGP11464;EGP12517	EGP28222;EGP11464	2	EGP12517	1
Biological process	GO:1905421	regulation of plant organ morphogenesis	3/1312	0.710924	3	EGP07168;EGP20060;novel.1702	EGP07168;EGP20060;novel.1702	3	--	0
Biological process	GO:0072522	purine-containing compound biosynthetic process	7/1312	0.711271	7	EGP25884;EGP14223;EGP19038;EGP04894;novel.1884;EGP04413;EGP24324	EGP25884;EGP19038;EGP04894;EGP04413	4	EGP14223;novel.1884;EGP24324	3
Biological process	GO:0042594	response to starvation	11/1312	0.711961	11	EGP25953;EGP16692;EGP01662;EGP15937;EGP02482;EGP25883;EGP14298;EGP33166;EGP09921;EGP05747;EGP16209	EGP25953;EGP16692;EGP01662;EGP15937;EGP14298;EGP33166;EGP09921	7	EGP02482;EGP25883;EGP05747;EGP16209	4
Biological process	GO:0048767	root hair elongation	4/1312	0.712689	4	EGP25835;EGP19721;EGP14515;EGP11523	EGP25835;EGP19721	2	EGP14515;EGP11523	2
Biological process	GO:1900150	regulation of defense response to fungus	4/1312	0.712689	4	EGP00626;EGP29761;EGP32309;EGP32311	EGP00626;EGP29761;EGP32309	3	EGP32311	1
Biological process	GO:0046653	tetrahydrofolate metabolic process	2/1312	0.715017	2	EGP19038;novel.1884	EGP19038	1	novel.1884	1
Biological process	GO:0072583	clathrin-dependent endocytosis	2/1312	0.715017	2	EGP06065;EGP00718	EGP06065	1	EGP00718	1
Biological process	GO:0051321	meiotic cell cycle	14/1312	0.716228	14	EGP13379;EGP08897;EGP31754;EGP10090;EGP20739;EGP30715;EGP33648;EGP02878;novel.775;EGP02877;EGP15437;EGP20726;EGP27167;EGP17260	EGP13379;EGP08897;EGP31754;EGP10090;EGP33648;EGP02878;novel.775;EGP02877;EGP20726;EGP27167;EGP17260	11	EGP20739;EGP30715;EGP15437	3
Biological process	GO:0140013	meiotic nuclear division	8/1312	0.718176	8	EGP13379;EGP31754;EGP30715;EGP33648;EGP02878;novel.775;EGP02877;EGP17260	EGP13379;EGP31754;EGP33648;EGP02878;novel.775;EGP02877;EGP17260	7	EGP30715	1
Biological process	GO:0002097	tRNA wobble base modification	1/1312	0.720138	1	EGP05421	EGP05421	1	--	0
Biological process	GO:0003008	system process	1/1312	0.720138	1	EGP13221	EGP13221	1	--	0
Biological process	GO:0003013	circulatory system process	1/1312	0.720138	1	EGP13221	EGP13221	1	--	0
Biological process	GO:0003018	vascular process in circulatory system	1/1312	0.720138	1	EGP13221	EGP13221	1	--	0
Biological process	GO:0006570	tyrosine metabolic process	1/1312	0.720138	1	EGP00684	EGP00684	1	--	0
Biological process	GO:0010216	maintenance of DNA methylation	1/1312	0.720138	1	EGP07024	EGP07024	1	--	0
Biological process	GO:0010232	vascular transport	1/1312	0.720138	1	EGP13221	EGP13221	1	--	0
Biological process	GO:0010233	phloem transport	1/1312	0.720138	1	EGP13221	EGP13221	1	--	0
Biological process	GO:0010600	regulation of auxin biosynthetic process	1/1312	0.720138	1	EGP30688	--	0	EGP30688	1
Biological process	GO:0042726	flavin-containing compound metabolic process	1/1312	0.720138	1	EGP20638	--	0	EGP20638	1
Biological process	GO:1990573	potassium ion import across plasma membrane	1/1312	0.720138	1	EGP19721	EGP19721	1	--	0
Biological process	GO:0006790	sulfur compound metabolic process	25/1312	0.720313	25	EGP25884;EGP30699;EGP28453;EGP16108;EGP13233;EGP17030;EGP05229;EGP30646;EGP07337;EGP18102;EGP00488;EGP01212;EGP21727;novel.2410;EGP04413;EGP24324;EGP18113;novel.1516;EGP29829;EGP22168;EGP16209;EGP04760;EGP33757;EGP22169;EGP16106	EGP25884;EGP30699;EGP13233;EGP05229;EGP07337;EGP18102;EGP21727;novel.2410;EGP04413;EGP18113;EGP29829;EGP22168;EGP04760;EGP22169	14	EGP28453;EGP16108;EGP17030;EGP30646;EGP00488;EGP01212;EGP24324;novel.1516;EGP16209;EGP33757;EGP16106	11
Biological process	GO:0016485	protein processing	3/1312	0.72284	3	EGP10339;EGP18973;EGP21961	EGP10339;EGP18973;EGP21961	3	--	0
Biological process	GO:0072527	pyrimidine-containing compound metabolic process	4/1312	0.723116	4	EGP17030;EGP13754;EGP21563;EGP23939	EGP13754;EGP21563;EGP23939	3	EGP17030	1
Biological process	GO:0008643	carbohydrate transport	8/1312	0.725718	8	EGP11410;EGP11079;EGP02446;novel.1789;EGP16717;EGP31721;EGP10851;EGP03306	EGP02446;EGP31721	2	EGP11410;EGP11079;novel.1789;EGP16717;EGP10851;EGP03306	6
Biological process	GO:0033044	regulation of chromosome organization	5/1312	0.726099	5	EGP13379;EGP02878;EGP02877;EGP31804;EGP20291	EGP13379;EGP02878;EGP02877	3	EGP31804;EGP20291	2
Biological process	GO:0051510	regulation of unidimensional cell growth	5/1312	0.726099	5	EGP31526;EGP18133;EGP20751;EGP10076;EGP31362	EGP18133	1	EGP31526;EGP20751;EGP10076;EGP31362	4
Biological process	GO:0030148	sphingolipid biosynthetic process	2/1312	0.729148	2	EGP12462;EGP33663	EGP12462;EGP33663	2	--	0
Biological process	GO:0046839	phospholipid dephosphorylation	2/1312	0.729148	2	EGP19170;EGP18265	--	0	EGP19170;EGP18265	2
Biological process	GO:0051651	maintenance of location in cell	2/1312	0.729148	2	EGP06058;EGP08971	EGP06058;EGP08971	2	--	0
Biological process	GO:0009696	salicylic acid metabolic process	4/1312	0.73326	4	EGP30521;EGP10406;EGP22133;EGP13526	EGP10406;EGP22133;EGP13526	3	EGP30521	1
Biological process	GO:0009933	meristem structural organization	4/1312	0.73326	4	EGP25884;EGP10512;EGP30679;EGP20291	EGP25884;EGP10512	2	EGP30679;EGP20291	2
Biological process	GO:0010675	regulation of cellular carbohydrate metabolic process	4/1312	0.73326	4	EGP10096;EGP13890;EGP16209;EGP19523	EGP10096;EGP19523	2	EGP13890;EGP16209	2
Biological process	GO:0001709	cell fate determination	1/1312	0.739263	1	EGP04733	EGP04733	1	--	0
Biological process	GO:0007265	Ras protein signal transduction	1/1312	0.739263	1	EGP28230	EGP28230	1	--	0
Biological process	GO:0009262	deoxyribonucleotide metabolic process	1/1312	0.739263	1	EGP13754	EGP13754	1	--	0
Biological process	GO:0010044	response to aluminum ion	1/1312	0.739263	1	EGP03045	--	0	EGP03045	1
Biological process	GO:0010257	NADH dehydrogenase complex assembly	1/1312	0.739263	1	EGP16430	--	0	EGP16430	1
Biological process	GO:0010440	stomatal lineage progression	1/1312	0.739263	1	novel.1419	--	0	novel.1419	1
Biological process	GO:0010506	regulation of autophagy	1/1312	0.739263	1	EGP05286	EGP05286	1	--	0
Biological process	GO:0015936	coenzyme A metabolic process	1/1312	0.739263	1	EGP30785	EGP30785	1	--	0
Biological process	GO:0015985	energy coupled proton transport, down electrochemical gradient	1/1312	0.739263	1	EGP14223	--	0	EGP14223	1
Biological process	GO:0015986	ATP synthesis coupled proton transport	1/1312	0.739263	1	EGP14223	--	0	EGP14223	1
Biological process	GO:0031099	regeneration	1/1312	0.739263	1	EGP07371	EGP07371	1	--	0
Biological process	GO:0040020	regulation of meiotic nuclear division	1/1312	0.739263	1	EGP31754	EGP31754	1	--	0
Biological process	GO:0045338	farnesyl diphosphate metabolic process	1/1312	0.739263	1	EGP28582	--	0	EGP28582	1
Biological process	GO:0045723	positive regulation of fatty acid biosynthetic process	1/1312	0.739263	1	EGP13860	--	0	EGP13860	1
Biological process	GO:0048017	inositol lipid-mediated signaling	1/1312	0.739263	1	EGP22648	EGP22648	1	--	0
Biological process	GO:0048358	mucilage pectin biosynthetic process	1/1312	0.739263	1	EGP21950	--	0	EGP21950	1
Biological process	GO:0051570	regulation of histone H3-K9 methylation	1/1312	0.739263	1	EGP13379	EGP13379	1	--	0
Biological process	GO:0097264	self proteolysis	1/1312	0.739263	1	EGP25999	EGP25999	1	--	0
Biological process	GO:1902183	regulation of shoot apical meristem development	1/1312	0.739263	1	EGP20751	--	0	EGP20751	1
Biological process	GO:0006487	protein N-linked glycosylation	2/1312	0.74268	2	EGP12073;EGP31009	EGP31009	1	EGP12073	1
Biological process	GO:0007088	regulation of mitotic nuclear division	2/1312	0.74268	2	novel.2248;EGP13377	novel.2248	1	EGP13377	1
Biological process	GO:0010337	regulation of salicylic acid metabolic process	2/1312	0.74268	2	EGP30521;EGP10406	EGP10406	1	EGP30521	1
Biological process	GO:0019217	regulation of fatty acid metabolic process	2/1312	0.74268	2	EGP13860;EGP20291	--	0	EGP13860;EGP20291	2
Biological process	GO:0032543	mitochondrial translation	2/1312	0.74268	2	EGP14208;novel.982	--	0	EGP14208;novel.982	2
Biological process	GO:0002253	activation of immune response	4/1312	0.743122	4	EGP08934;EGP08936;EGP26278;EGP31080	EGP08936;EGP26278	2	EGP08934;EGP31080	2
Biological process	GO:0030162	regulation of proteolysis	4/1312	0.743122	4	EGP13603;EGP28526;EGP28539;EGP10223	EGP13603;EGP28526;EGP28539;EGP10223	4	--	0
Biological process	GO:0071496	cellular response to external stimulus	13/1312	0.744312	13	EGP25953;EGP16692;EGP01662;EGP13754;EGP15937;EGP02482;EGP26198;EGP25883;EGP26196;EGP20751;EGP09921;EGP05747;EGP16209	EGP25953;EGP16692;EGP01662;EGP13754;EGP15937;EGP26198;EGP26196;EGP09921	8	EGP02482;EGP25883;EGP20751;EGP05747;EGP16209	5
Biological process	GO:0009156	ribonucleoside monophosphate biosynthetic process	3/1312	0.745517	3	EGP19038;EGP04894;novel.1884	EGP19038;EGP04894	2	novel.1884	1
Biological process	GO:0031668	cellular response to extracellular stimulus	12/1312	0.74993	12	EGP25953;EGP16692;EGP01662;EGP13754;EGP15937;EGP02482;EGP26198;EGP25883;EGP26196;EGP09921;EGP05747;EGP16209	EGP25953;EGP16692;EGP01662;EGP13754;EGP15937;EGP26198;EGP26196;EGP09921	8	EGP02482;EGP25883;EGP05747;EGP16209	4
Biological process	GO:0009798	axis specification	4/1312	0.752704	4	EGP14253;EGP20751;EGP24145;EGP20060	EGP14253;EGP24145;EGP20060	3	EGP20751	1
Biological process	GO:0031146	SCF-dependent proteasomal ubiquitin-dependent protein catabolic process	4/1312	0.752704	4	EGP16692;EGP02497;EGP15937;EGP10181	EGP16692;EGP15937;EGP10181	3	EGP02497	1
Biological process	GO:0009152	purine ribonucleotide biosynthetic process	6/1312	0.754742	6	EGP25884;EGP14223;EGP19038;EGP04894;novel.1884;EGP24324	EGP25884;EGP19038;EGP04894	3	EGP14223;novel.1884;EGP24324	3
Biological process	GO:0010345	suberin biosynthetic process	2/1312	0.755629	2	EGP08904;EGP23937	--	0	EGP08904;EGP23937	2
Biological process	GO:0019722	calcium-mediated signaling	2/1312	0.755629	2	EGP14051;EGP14053	EGP14053	1	EGP14051	1
Biological process	GO:0032875	regulation of DNA endoreduplication	2/1312	0.755629	2	novel.2248;EGP13377	novel.2248	1	EGP13377	1
Biological process	GO:0050829	defense response to Gram-negative bacterium	2/1312	0.755629	2	EGP16137;EGP33662	EGP16137;EGP33662	2	--	0
Biological process	GO:1902532	negative regulation of intracellular signal transduction	2/1312	0.755629	2	EGP28230;EGP14515	EGP28230	1	EGP14515	1
Biological process	GO:0045324	late endosome to vacuole transport	3/1312	0.756287	3	EGP31804;novel.1585;EGP34470	EGP34470	1	EGP31804;novel.1585	2
Biological process	GO:0006346	DNA methylation-dependent heterochromatin assembly	1/1312	0.757082	1	EGP13609	EGP13609	1	--	0
Biological process	GO:0006754	ATP biosynthetic process	1/1312	0.757082	1	EGP14223	--	0	EGP14223	1
Biological process	GO:0009959	negative gravitropism	1/1312	0.757082	1	EGP15862	--	0	EGP15862	1
Biological process	GO:0030245	cellulose catabolic process	1/1312	0.757082	1	EGP06995	EGP06995	1	--	0
Biological process	GO:0042451	purine nucleoside biosynthetic process	1/1312	0.757082	1	EGP04413	EGP04413	1	--	0
Biological process	GO:0046129	purine ribonucleoside biosynthetic process	1/1312	0.757082	1	EGP04413	EGP04413	1	--	0
Biological process	GO:0051054	positive regulation of DNA metabolic process	1/1312	0.757082	1	EGP13641	--	0	EGP13641	1
Biological process	GO:0090421	embryonic meristem initiation	1/1312	0.757082	1	EGP25884	EGP25884	1	--	0
Biological process	GO:2000034	regulation of seed maturation	1/1312	0.757082	1	EGP05747	--	0	EGP05747	1
Biological process	GO:1901361	organic cyclic compound catabolic process	18/1312	0.75849	18	EGP24622;EGP01597;EGP05874;EGP00684;EGP13754;EGP21563;EGP16486;novel.2017;EGP33762;EGP24248;EGP18900;novel.1560;EGP31025;EGP17014;EGP13526;EGP13251;EGP33822;EGP18016	EGP24622;EGP00684;EGP13754;EGP21563;EGP16486;novel.1560;EGP13526;EGP33822	8	EGP01597;EGP05874;novel.2017;EGP33762;EGP24248;EGP18900;EGP31025;EGP17014;EGP13251;EGP18016	10
Biological process	GO:0031669	cellular response to nutrient levels	9/1312	0.758897	9	EGP25953;EGP16692;EGP01662;EGP15937;EGP02482;EGP25883;EGP09921;EGP05747;EGP16209	EGP25953;EGP16692;EGP01662;EGP15937;EGP09921	5	EGP02482;EGP25883;EGP05747;EGP16209	4
Biological process	GO:0072593	reactive oxygen species metabolic process	16/1312	0.761812	16	EGP04328;EGP28812;EGP18914;EGP30562;EGP32018;EGP23698;EGP27612;EGP30989;novel.1002;EGP02984;EGP33545;EGP27988;EGP06080;EGP30890;EGP21830;EGP02792	EGP28812;EGP18914;EGP30562;EGP23698;EGP02984;EGP33545;EGP27988;EGP06080;EGP21830	9	EGP04328;EGP32018;EGP27612;EGP30989;novel.1002;EGP30890;EGP02792	7
Biological process	GO:0009161	ribonucleoside monophosphate metabolic process	3/1312	0.766686	3	EGP19038;EGP04894;novel.1884	EGP19038;EGP04894	2	novel.1884	1
Biological process	GO:0009646	response to absence of light	3/1312	0.766686	3	EGP02432;EGP00513;EGP31080	--	0	EGP02432;EGP00513;EGP31080	3
Biological process	GO:0051783	regulation of nuclear division	3/1312	0.766686	3	novel.2248;EGP31754;EGP13377	novel.2248;EGP31754	2	EGP13377	1
Biological process	GO:0006164	purine nucleotide biosynthetic process	6/1312	0.770085	6	EGP25884;EGP14223;EGP19038;EGP04894;novel.1884;EGP24324	EGP25884;EGP19038;EGP04894	3	EGP14223;novel.1884;EGP24324	3
Biological process	GO:0002684	positive regulation of immune system process	4/1312	0.771038	4	EGP08934;EGP08936;EGP26278;EGP31080	EGP08936;EGP26278	2	EGP08934;EGP31080	2
Biological process	GO:0007131	reciprocal meiotic recombination	4/1312	0.771038	4	EGP30715;EGP33648;novel.775;EGP17260	EGP33648;novel.775;EGP17260	3	EGP30715	1
Biological process	GO:0032881	regulation of polysaccharide metabolic process	4/1312	0.771038	4	EGP10096;EGP25999;EGP13890;EGP19523	EGP10096;EGP25999;EGP19523	3	EGP13890	1
Biological process	GO:0035825	homologous recombination	4/1312	0.771038	4	EGP30715;EGP33648;novel.775;EGP17260	EGP33648;novel.775;EGP17260	3	EGP30715	1
Biological process	GO:0050778	positive regulation of immune response	4/1312	0.771038	4	EGP08934;EGP08936;EGP26278;EGP31080	EGP08936;EGP26278	2	EGP08934;EGP31080	2
Biological process	GO:0140527	reciprocal homologous recombination	4/1312	0.771038	4	EGP30715;EGP33648;novel.775;EGP17260	EGP33648;novel.775;EGP17260	3	EGP30715	1
Biological process	GO:0031399	regulation of protein modification process	12/1312	0.7726	12	EGP13379;EGP17805;EGP20657;EGP16278;EGP18709;EGP28222;EGP11464;EGP12517;EGP18281;EGP31804;EGP16279;EGP20291	EGP13379;EGP16278;EGP18709;EGP28222;EGP11464;EGP18281;EGP16279	7	EGP17805;EGP20657;EGP12517;EGP31804;EGP20291	5
Biological process	GO:0000712	resolution of meiotic recombination intermediates	1/1312	0.773684	1	EGP17260	EGP17260	1	--	0
Biological process	GO:0009269	response to desiccation	1/1312	0.773684	1	EGP05271	EGP05271	1	--	0
Biological process	GO:0009806	lignan metabolic process	1/1312	0.773684	1	EGP00076	--	0	EGP00076	1
Biological process	GO:0009807	lignan biosynthetic process	1/1312	0.773684	1	EGP00076	--	0	EGP00076	1
Biological process	GO:0030042	actin filament depolymerization	1/1312	0.773684	1	EGP17263	EGP17263	1	--	0
Biological process	GO:0043173	nucleotide salvage	1/1312	0.773684	1	EGP06150	EGP06150	1	--	0
Biological process	GO:0045923	positive regulation of fatty acid metabolic process	1/1312	0.773684	1	EGP13860	--	0	EGP13860	1
Biological process	GO:0046112	nucleobase biosynthetic process	1/1312	0.773684	1	EGP04894	EGP04894	1	--	0
Biological process	GO:0046785	microtubule polymerization	1/1312	0.773684	1	EGP28711	EGP28711	1	--	0
Biological process	GO:0048572	short-day photoperiodism	1/1312	0.773684	1	EGP11294	--	0	EGP11294	1
Biological process	GO:0048575	short-day photoperiodism, flowering	1/1312	0.773684	1	EGP11294	--	0	EGP11294	1
Biological process	GO:0051781	positive regulation of cell division	1/1312	0.773684	1	EGP26239	EGP26239	1	--	0
Biological process	GO:0090354	regulation of auxin metabolic process	1/1312	0.773684	1	EGP30688	--	0	EGP30688	1
Biological process	GO:2000069	regulation of post-embryonic root development	1/1312	0.773684	1	EGP14515	--	0	EGP14515	1
Biological process	GO:0065009	regulation of molecular function	22/1312	0.775756	22	EGP07290;EGP28230;EGP13641;EGP00884;EGP17805;EGP16278;EGP08904;EGP18709;EGP12788;EGP28222;EGP11282;EGP11464;EGP12517;EGP23937;EGP22353;EGP13603;EGP21200;EGP30737;EGP26639;EGP16279;EGP28526;EGP28539	EGP07290;EGP28230;EGP16278;EGP18709;EGP12788;EGP28222;EGP11464;EGP13603;EGP30737;EGP16279;EGP28526;EGP28539	12	EGP13641;EGP00884;EGP17805;EGP08904;EGP11282;EGP12517;EGP23937;EGP22353;EGP21200;EGP26639	10
Biological process	GO:0016108	tetraterpenoid metabolic process	3/1312	0.776721	3	EGP28582;EGP31370;EGP33822	EGP33822	1	EGP28582;EGP31370	2
Biological process	GO:0016116	carotenoid metabolic process	3/1312	0.776721	3	EGP28582;EGP31370;EGP33822	EGP33822	1	EGP28582;EGP31370	2
Biological process	GO:0008283	cell population proliferation	5/1312	0.777473	5	EGP18499;novel.1801;EGP31245;EGP19885;novel.1412	EGP18499;novel.1801;EGP31245	3	EGP19885;novel.1412	2
Biological process	GO:0009821	alkaloid biosynthetic process	2/1312	0.779842	2	EGP08887;novel.797	EGP08887;novel.797	2	--	0
Biological process	GO:0098876	vesicle-mediated transport to the plasma membrane	2/1312	0.779842	2	EGP25835;EGP16759	EGP25835;EGP16759	2	--	0
Biological process	GO:0048609	multicellular organismal reproductive process	14/1312	0.781654	14	EGP13379;EGP12552;EGP02677;EGP02878;EGP02877;EGP20751;EGP10076;EGP21950;EGP15718;EGP31068;EGP05747;EGP10851;EGP17260;EGP31362	EGP13379;EGP12552;EGP02677;EGP02878;EGP02877;EGP15718;EGP31068;EGP17260	8	EGP20751;EGP10076;EGP21950;EGP05747;EGP10851;EGP31362	6
Biological process	GO:0031401	positive regulation of protein modification process	3/1312	0.786398	3	EGP13379;EGP31804;EGP20291	EGP13379	1	EGP31804;EGP20291	2
Biological process	GO:0001932	regulation of protein phosphorylation	4/1312	0.788287	4	EGP13379;EGP28222;EGP11464;EGP12517	EGP13379;EGP28222;EGP11464	3	EGP12517	1
Biological process	GO:0006887	exocytosis	4/1312	0.788287	4	EGP14030;EGP00220;EGP16759;EGP32367	EGP14030;EGP00220;EGP16759	3	EGP32367	1
Biological process	GO:0006085	acetyl-CoA biosynthetic process	1/1312	0.789152	1	EGP24324	--	0	EGP24324	1
Biological process	GO:0006561	proline biosynthetic process	1/1312	0.789152	1	EGP27512	EGP27512	1	--	0
Biological process	GO:0009768	photosynthesis, light harvesting in photosystem I	1/1312	0.789152	1	EGP19984	--	0	EGP19984	1
Biological process	GO:0016075	rRNA catabolic process	1/1312	0.789152	1	novel.1560	novel.1560	1	--	0
Biological process	GO:0030150	protein import into mitochondrial matrix	1/1312	0.789152	1	EGP13595	--	0	EGP13595	1
Biological process	GO:0043903	regulation of biological process involved in symbiotic interaction	1/1312	0.789152	1	EGP26278	EGP26278	1	--	0
Biological process	GO:0046496	nicotinamide nucleotide metabolic process	1/1312	0.789152	1	EGP05874	--	0	EGP05874	1
Biological process	GO:0048354	mucilage biosynthetic process involved in seed coat development	1/1312	0.789152	1	EGP21347	--	0	EGP21347	1
Biological process	GO:0048449	floral organ formation	1/1312	0.789152	1	EGP31343	EGP31343	1	--	0
Biological process	GO:0051017	actin filament bundle assembly	1/1312	0.789152	1	EGP17205	EGP17205	1	--	0
Biological process	GO:0051275	beta-glucan catabolic process	1/1312	0.789152	1	EGP06995	EGP06995	1	--	0
Biological process	GO:0061572	actin filament bundle organization	1/1312	0.789152	1	EGP17205	EGP17205	1	--	0
Biological process	GO:0080183	response to photooxidative stress	1/1312	0.789152	1	EGP15686	--	0	EGP15686	1
Biological process	GO:0090502	RNA phosphodiester bond hydrolysis, endonucleolytic	1/1312	0.789152	1	EGP01578	EGP01578	1	--	0
Biological process	GO:0010267	production of ta-siRNAs involved in RNA interference	2/1312	0.791141	2	EGP00333;EGP07024	EGP00333;EGP07024	2	--	0
Biological process	GO:0051784	negative regulation of nuclear division	2/1312	0.791141	2	novel.2248;EGP13377	novel.2248	1	EGP13377	1
Biological process	GO:0060548	negative regulation of cell death	2/1312	0.791141	2	EGP09197;EGP26278	EGP09197;EGP26278	2	--	0
Biological process	GO:0048468	cell development	21/1312	0.791363	21	EGP28230;EGP12845;EGP31706;EGP05097;EGP00854;EGP28711;EGP13443;novel.176;EGP06773;EGP25835;EGP18133;EGP06065;EGP00017;EGP04733;EGP11170;EGP03376;EGP19721;EGP26239;EGP14515;EGP11523;EGP00784	EGP28230;EGP12845;EGP05097;EGP00854;EGP28711;EGP13443;novel.176;EGP06773;EGP25835;EGP18133;EGP06065;EGP00017;EGP04733;EGP19721;EGP26239	15	EGP31706;EGP11170;EGP03376;EGP14515;EGP11523;EGP00784	6
Biological process	GO:0022411	cellular component disassembly	6/1312	0.791739	6	EGP17263;EGP10536;EGP30693;novel.1168;novel.857;EGP29382	EGP17263;EGP10536;novel.1168;novel.857;EGP29382	5	EGP30693	1
Biological process	GO:0010639	negative regulation of organelle organization	3/1312	0.795725	3	novel.2248;EGP17263;EGP13377	novel.2248;EGP17263	2	EGP13377	1
Biological process	GO:0042538	hyperosmotic salinity response	3/1312	0.795725	3	EGP26198;EGP26196;novel.1155	EGP26198;EGP26196;novel.1155	3	--	0
Biological process	GO:0031667	response to nutrient levels	12/1312	0.79887	12	EGP25953;EGP16692;EGP01662;EGP15937;EGP02482;EGP25883;EGP14298;EGP33166;EGP09921;EGP05747;EGP16209;EGP31080	EGP25953;EGP16692;EGP01662;EGP15937;EGP14298;EGP33166;EGP09921	7	EGP02482;EGP25883;EGP05747;EGP16209;EGP31080	5
Biological process	GO:0030004	cellular monovalent inorganic cation homeostasis	2/1312	0.801925	2	EGP06737;EGP24990	EGP24990	1	EGP06737	1
Biological process	GO:0032509	endosome transport via multivesicular body sorting pathway	2/1312	0.801925	2	novel.1585;EGP34470	EGP34470	1	novel.1585	1
Biological process	GO:0034250	positive regulation of cellular amide metabolic process	2/1312	0.801925	2	EGP14208;EGP10289	EGP10289	1	EGP14208	1
Biological process	GO:0045727	positive regulation of translation	2/1312	0.801925	2	EGP14208;EGP10289	EGP10289	1	EGP14208	1
Biological process	GO:0071985	multivesicular body sorting pathway	2/1312	0.801925	2	novel.1585;EGP34470	EGP34470	1	novel.1585	1
Biological process	GO:1901990	regulation of mitotic cell cycle phase transition	2/1312	0.801925	2	EGP10090;EGP30715	EGP10090	1	EGP30715	1
Biological process	GO:1905268	negative regulation of chromatin organization	2/1312	0.801925	2	EGP13379;EGP20291	EGP13379	1	EGP20291	1
Biological process	GO:0010207	photosystem II assembly	1/1312	0.803564	1	EGP20623	--	0	EGP20623	1
Biological process	GO:0043244	regulation of protein-containing complex disassembly	1/1312	0.803564	1	EGP17263	EGP17263	1	--	0
Biological process	GO:0048363	mucilage pectin metabolic process	1/1312	0.803564	1	EGP21950	--	0	EGP21950	1
Biological process	GO:0072659	protein localization to plasma membrane	1/1312	0.803564	1	EGP06065	EGP06065	1	--	0
Biological process	GO:0080050	regulation of seed development	1/1312	0.803564	1	EGP05747	--	0	EGP05747	1
Biological process	GO:0060969	negative regulation of gene silencing	3/1312	0.804709	3	EGP19849;EGP19847;EGP19848	--	0	EGP19849;EGP19847;EGP19848	3
Biological process	GO:0000154	rRNA modification	2/1312	0.812211	2	EGP06872;EGP06871	EGP06872	1	EGP06871	1
Biological process	GO:0042631	cellular response to water deprivation	2/1312	0.812211	2	EGP26198;EGP26196	EGP26198;EGP26196	2	--	0
Biological process	GO:0046173	polyol biosynthetic process	2/1312	0.812211	2	EGP10869;EGP12460	EGP10869	1	EGP12460	1
Biological process	GO:0046460	neutral lipid biosynthetic process	2/1312	0.812211	2	EGP06308;EGP31009	EGP31009	1	EGP06308	1
Biological process	GO:0046463	acylglycerol biosynthetic process	2/1312	0.812211	2	EGP06308;EGP31009	EGP31009	1	EGP06308	1
Biological process	GO:0009124	nucleoside monophosphate biosynthetic process	3/1312	0.813358	3	EGP19038;EGP04894;novel.1884	EGP19038;EGP04894	2	novel.1884	1
Biological process	GO:0043255	regulation of carbohydrate biosynthetic process	3/1312	0.813358	3	EGP13468;EGP15957;EGP16209	EGP13468	1	EGP15957;EGP16209	2
Biological process	GO:0005996	monosaccharide metabolic process	10/1312	0.813989	10	EGP13468;EGP25953;EGP04779;EGP19572;EGP07193;EGP07192;EGP21838;EGP04557;EGP31011;EGP28107	EGP13468;EGP25953;EGP07193;EGP07192;EGP21838;EGP04557;EGP28107	7	EGP04779;EGP19572;EGP31011	3
Biological process	GO:0006596	polyamine biosynthetic process	1/1312	0.816991	1	EGP04413	EGP04413	1	--	0
Biological process	GO:0006672	ceramide metabolic process	1/1312	0.816991	1	EGP33663	EGP33663	1	--	0
Biological process	GO:0006826	iron ion transport	1/1312	0.816991	1	EGP00513	--	0	EGP00513	1
Biological process	GO:0032535	regulation of cellular component size	4/1312	0.819653	4	EGP17263;EGP13537;EGP09489;EGP09666	EGP17263;EGP13537	2	EGP09489;EGP09666	2
Biological process	GO:0090066	regulation of anatomical structure size	4/1312	0.819653	4	EGP17263;EGP13537;EGP09489;EGP09666	EGP17263;EGP13537	2	EGP09489;EGP09666	2
Biological process	GO:0009746	response to hexose	3/1312	0.82168	3	EGP07371;EGP14298;EGP18890	EGP07371;EGP14298	2	EGP18890	1
Biological process	GO:0071900	regulation of protein serine/threonine kinase activity	3/1312	0.82168	3	EGP28222;EGP11464;EGP12517	EGP28222;EGP11464	2	EGP12517	1
Biological process	GO:0009991	response to extracellular stimulus	15/1312	0.821826	15	EGP25953;EGP16692;EGP01662;EGP13754;EGP15937;EGP02482;EGP26198;EGP25883;EGP14298;EGP26196;EGP33166;EGP09921;EGP05747;EGP16209;EGP31080	EGP25953;EGP16692;EGP01662;EGP13754;EGP15937;EGP26198;EGP14298;EGP26196;EGP33166;EGP09921	10	EGP02482;EGP25883;EGP05747;EGP16209;EGP31080	5
Biological process	GO:1901987	regulation of cell cycle phase transition	2/1312	0.822018	2	EGP10090;EGP30715	EGP10090	1	EGP30715	1
Biological process	GO:0010628	positive regulation of gene expression	9/1312	0.822941	9	EGP11266;EGP14208;EGP19255;EGP19849;EGP10289;EGP19847;EGP25999;EGP19848;EGP11268	EGP10289;EGP25999	2	EGP11266;EGP14208;EGP19255;EGP19849;EGP19847;EGP19848;EGP11268	7
Biological process	GO:0044093	positive regulation of molecular function	9/1312	0.822941	9	EGP28230;EGP13641;EGP00884;EGP08904;EGP12788;EGP11282;EGP23937;EGP21200;EGP26639	EGP28230;EGP12788	2	EGP13641;EGP00884;EGP08904;EGP11282;EGP23937;EGP21200;EGP26639	7
Biological process	GO:0042743	hydrogen peroxide metabolic process	9/1312	0.828052	9	EGP28812;EGP30562;EGP23698;EGP30989;EGP33545;EGP27988;EGP06080;EGP30890;EGP02792	EGP28812;EGP30562;EGP23698;EGP33545;EGP27988;EGP06080	6	EGP30989;EGP30890;EGP02792	3
Biological process	GO:0030838	positive regulation of actin filament polymerization	1/1312	0.829501	1	EGP17263	EGP17263	1	--	0
Biological process	GO:0031062	positive regulation of histone methylation	1/1312	0.829501	1	EGP13379	EGP13379	1	--	0
Biological process	GO:0045010	actin nucleation	1/1312	0.829501	1	EGP17263	EGP17263	1	--	0
Biological process	GO:0046128	purine ribonucleoside metabolic process	1/1312	0.829501	1	EGP04413	EGP04413	1	--	0
Biological process	GO:0072525	pyridine-containing compound biosynthetic process	1/1312	0.829501	1	EGP06150	EGP06150	1	--	0
Biological process	GO:1902066	regulation of cell wall pectin metabolic process	1/1312	0.829501	1	EGP25999	EGP25999	1	--	0
Biological process	GO:0006816	calcium ion transport	3/1312	0.829684	3	EGP14051;EGP30372;EGP14053	EGP14053	1	EGP14051;EGP30372	2
Biological process	GO:0009123	nucleoside monophosphate metabolic process	3/1312	0.829684	3	EGP19038;EGP04894;novel.1884	EGP19038;EGP04894	2	novel.1884	1
Biological process	GO:0006006	glucose metabolic process	2/1312	0.831361	2	EGP25953;EGP28107	EGP25953;EGP28107	2	--	0
Biological process	GO:0006650	glycerophospholipid metabolic process	9/1312	0.83305	9	EGP08897;EGP13822;EGP08919;EGP19170;EGP05345;EGP03182;EGP18265;EGP29483;EGP12460	EGP08897;EGP13822;EGP03182;EGP29483	4	EGP08919;EGP19170;EGP05345;EGP18265;EGP12460	5
Biological process	GO:0006644	phospholipid metabolic process	14/1312	0.835774	14	EGP28582;EGP08897;EGP13822;EGP08919;EGP19170;EGP05132;EGP05345;EGP03077;EGP03182;EGP03376;EGP18265;EGP29483;EGP02151;EGP12460	EGP08897;EGP13822;EGP05132;EGP03077;EGP03182;EGP29483;EGP02151	7	EGP28582;EGP08919;EGP19170;EGP05345;EGP03376;EGP18265;EGP12460	7
Biological process	GO:0018022	peptidyl-lysine methylation	6/1312	0.836143	6	EGP13379;EGP19307;EGP19302;EGP13609;EGP30697;EGP20291	EGP13379;EGP19307;EGP19302;EGP13609;EGP30697	5	EGP20291	1
Biological process	GO:0000209	protein polyubiquitination	5/1312	0.840181	5	EGP22035;EGP28117;EGP23552;EGP11089;EGP10223	EGP22035;EGP28117;EGP23552;EGP11089;EGP10223	5	--	0
Biological process	GO:0046488	phosphatidylinositol metabolic process	5/1312	0.840181	5	EGP08919;EGP19170;EGP05345;EGP18265;EGP12460	--	0	EGP08919;EGP19170;EGP05345;EGP18265;EGP12460	5
Biological process	GO:0061982	meiosis I cell cycle process	5/1312	0.840181	5	EGP13379;EGP30715;EGP33648;novel.775;EGP17260	EGP13379;EGP33648;novel.775;EGP17260	4	EGP30715	1
Biological process	GO:0019932	second-messenger-mediated signaling	2/1312	0.84026	2	EGP14051;EGP14053	EGP14053	1	EGP14051	1
Biological process	GO:0030865	cortical cytoskeleton organization	2/1312	0.84026	2	EGP18770;EGP03122	--	0	EGP18770;EGP03122	2
Biological process	GO:0045787	positive regulation of cell cycle	2/1312	0.84026	2	EGP13379;EGP20291	EGP13379	1	EGP20291	1
Biological process	GO:0070919	production of siRNA involved in chromatin silencing by small RNA	2/1312	0.84026	2	EGP19307;EGP19302	EGP19307;EGP19302	2	--	0
Biological process	GO:0016197	endosomal transport	4/1312	0.840579	4	EGP31804;EGP00220;novel.1585;EGP34470	EGP00220;EGP34470	2	EGP31804;novel.1585	2
Biological process	GO:0009147	pyrimidine nucleoside triphosphate metabolic process	1/1312	0.841157	1	EGP13754	EGP13754	1	--	0
Biological process	GO:0051445	regulation of meiotic cell cycle	1/1312	0.841157	1	EGP31754	EGP31754	1	--	0
Biological process	GO:0070897	transcription preinitiation complex assembly	1/1312	0.841157	1	EGP02828	EGP02828	1	--	0
Biological process	GO:0050790	regulation of catalytic activity	18/1312	0.841468	18	EGP07290;EGP28230;EGP13641;EGP17805;EGP16278;EGP08904;EGP18709;EGP28222;EGP11282;EGP11464;EGP12517;EGP23937;EGP22353;EGP13603;EGP26639;EGP16279;EGP28526;EGP28539	EGP07290;EGP28230;EGP16278;EGP18709;EGP28222;EGP11464;EGP13603;EGP16279;EGP28526;EGP28539	10	EGP13641;EGP17805;EGP08904;EGP11282;EGP12517;EGP23937;EGP22353;EGP26639	8
Biological process	GO:1901607	alpha-amino acid biosynthetic process	12/1312	0.844657	12	EGP16108;EGP13233;EGP05229;EGP30646;EGP06849;novel.2410;EGP09532;EGP27512;EGP15762;EGP18457;EGP09347;EGP16106	EGP13233;EGP05229;EGP06849;novel.2410;EGP09532;EGP27512;EGP15762;EGP18457;EGP09347	9	EGP16108;EGP30646;EGP16106	3
Biological process	GO:1900055	regulation of leaf senescence	3/1312	0.844769	3	novel.2203;EGP00176;EGP00889	--	0	novel.2203;EGP00176;EGP00889	3
Biological process	GO:0009226	nucleotide-sugar biosynthetic process	2/1312	0.848731	2	EGP30944;EGP21838	EGP30944;EGP21838	2	--	0
Biological process	GO:0034284	response to monosaccharide	3/1312	0.851867	3	EGP07371;EGP14298;EGP18890	EGP07371;EGP14298	2	EGP18890	1
Biological process	GO:0000028	ribosomal small subunit assembly	1/1312	0.852016	1	EGP05675	--	0	EGP05675	1
Biological process	GO:0042147	retrograde transport, endosome to Golgi	1/1312	0.852016	1	EGP00220	EGP00220	1	--	0
Biological process	GO:0043171	peptide catabolic process	1/1312	0.852016	1	EGP25999	EGP25999	1	--	0
Biological process	GO:0043650	dicarboxylic acid biosynthetic process	1/1312	0.852016	1	EGP04332	EGP04332	1	--	0
Biological process	GO:0051307	meiotic chromosome separation	1/1312	0.852016	1	EGP17260	EGP17260	1	--	0
Biological process	GO:0098659	inorganic cation import across plasma membrane	1/1312	0.852016	1	EGP19721	EGP19721	1	--	0
Biological process	GO:0099587	inorganic ion import across plasma membrane	1/1312	0.852016	1	EGP19721	EGP19721	1	--	0
Biological process	GO:1990778	protein localization to cell periphery	1/1312	0.852016	1	EGP06065	EGP06065	1	--	0
Biological process	GO:0009910	negative regulation of flower development	2/1312	0.856791	2	EGP25915;EGP08799	EGP08799	1	EGP25915	1
Biological process	GO:0033866	nucleoside bisphosphate biosynthetic process	2/1312	0.856791	2	EGP25884;EGP24324	EGP25884	1	EGP24324	1
Biological process	GO:0034030	ribonucleoside bisphosphate biosynthetic process	2/1312	0.856791	2	EGP25884;EGP24324	EGP25884	1	EGP24324	1
Biological process	GO:0034033	purine nucleoside bisphosphate biosynthetic process	2/1312	0.856791	2	EGP25884;EGP24324	EGP25884	1	EGP24324	1
Biological process	GO:0048444	floral organ morphogenesis	2/1312	0.856791	2	EGP06308;EGP31343	EGP31343	1	EGP06308	1
Biological process	GO:0090627	plant epidermal cell differentiation	8/1312	0.85746	8	EGP05097;EGP00854;EGP13443;EGP25835;EGP00017;EGP19721;EGP14515;EGP11523	EGP05097;EGP00854;EGP13443;EGP25835;EGP00017;EGP19721	6	EGP14515;EGP11523	2
Biological process	GO:0006972	hyperosmotic response	3/1312	0.85868	3	EGP26198;EGP26196;novel.1155	EGP26198;EGP26196;novel.1155	3	--	0
Biological process	GO:0044786	cell cycle DNA replication	3/1312	0.85868	3	novel.2248;EGP13377;novel.1650	novel.2248;novel.1650	2	EGP13377	1
Biological process	GO:0051258	protein polymerization	3/1312	0.85868	3	EGP17263;EGP28004;EGP28711	EGP17263;EGP28004;EGP28711	3	--	0
Biological process	GO:0007127	meiosis I	4/1312	0.859427	4	EGP30715;EGP33648;novel.775;EGP17260	EGP33648;novel.775;EGP17260	3	EGP30715	1
Biological process	GO:0000288	nuclear-transcribed mRNA catabolic process, deadenylation-dependent decay	1/1312	0.862134	1	EGP33762	--	0	EGP33762	1
Biological process	GO:0006270	DNA replication initiation	1/1312	0.862134	1	novel.1650	novel.1650	1	--	0
Biological process	GO:0006549	isoleucine metabolic process	1/1312	0.862134	1	EGP18457	EGP18457	1	--	0
Biological process	GO:0009097	isoleucine biosynthetic process	1/1312	0.862134	1	EGP18457	EGP18457	1	--	0
Biological process	GO:0009145	purine nucleoside triphosphate biosynthetic process	1/1312	0.862134	1	EGP14223	--	0	EGP14223	1
Biological process	GO:0009205	purine ribonucleoside triphosphate metabolic process	1/1312	0.862134	1	EGP14223	--	0	EGP14223	1
Biological process	GO:0009206	purine ribonucleoside triphosphate biosynthetic process	1/1312	0.862134	1	EGP14223	--	0	EGP14223	1
Biological process	GO:0019321	pentose metabolic process	1/1312	0.862134	1	EGP21838	EGP21838	1	--	0
Biological process	GO:0042762	regulation of sulfur metabolic process	1/1312	0.862134	1	EGP16209	--	0	EGP16209	1
Biological process	GO:0051347	positive regulation of transferase activity	1/1312	0.862134	1	EGP13641	--	0	EGP13641	1
Biological process	GO:1905177	tracheary element differentiation	1/1312	0.862134	1	EGP14030	EGP14030	1	--	0
Biological process	GO:0016049	cell growth	28/1312	0.86384	28	EGP31526;EGP01384;EGP31283;EGP28230;EGP28191;EGP19061;EGP31706;EGP10512;EGP00302;EGP11626;EGP25835;EGP18133;EGP18377;EGP06065;EGP20751;EGP10253;EGP33617;EGP00220;EGP10076;EGP11294;EGP04733;EGP20060;EGP03376;EGP19721;EGP14515;EGP11523;EGP31050;EGP31362	EGP31283;EGP28230;EGP28191;EGP19061;EGP10512;EGP25835;EGP18133;EGP18377;EGP06065;EGP10253;EGP33617;EGP00220;EGP04733;EGP20060;EGP19721	15	EGP31526;EGP01384;EGP31706;EGP00302;EGP11626;EGP20751;EGP10076;EGP11294;EGP03376;EGP14515;EGP11523;EGP31050;EGP31362	13
Biological process	GO:0045859	regulation of protein kinase activity	3/1312	0.865217	3	EGP28222;EGP11464;EGP12517	EGP28222;EGP11464	2	EGP12517	1
Biological process	GO:0034968	histone lysine methylation	5/1312	0.86824	5	EGP13379;EGP19307;EGP19302;EGP13609;EGP20291	EGP13379;EGP19307;EGP19302;EGP13609	4	EGP20291	1
Biological process	GO:0009744	response to sucrose	4/1312	0.870908	4	EGP15957;EGP14298;EGP09489;EGP02465	EGP14298	1	EGP15957;EGP09489;EGP02465	3
Biological process	GO:0042325	regulation of phosphorylation	4/1312	0.870908	4	EGP13379;EGP28222;EGP11464;EGP12517	EGP13379;EGP28222;EGP11464	3	EGP12517	1
Biological process	GO:0000096	sulfur amino acid metabolic process	3/1312	0.871486	3	EGP13233;EGP05229;EGP30646	EGP13233;EGP05229	2	EGP30646	1
Biological process	GO:0009853	photorespiration	3/1312	0.871486	3	EGP19038;novel.1884;EGP22956	EGP19038	1	novel.1884;EGP22956	2
Biological process	GO:0015780	nucleotide-sugar transmembrane transport	1/1312	0.87156	1	EGP02446	EGP02446	1	--	0
Biological process	GO:0030705	cytoskeleton-dependent intracellular transport	1/1312	0.87156	1	EGP07037	EGP07037	1	--	0
Biological process	GO:0045047	protein targeting to ER	1/1312	0.87156	1	EGP32463	--	0	EGP32463	1
Biological process	GO:0072599	establishment of protein localization to endoplasmic reticulum	1/1312	0.87156	1	EGP32463	--	0	EGP32463	1
Biological process	GO:0031122	cytoplasmic microtubule organization	2/1312	0.871744	2	EGP18770;EGP03122	--	0	EGP18770;EGP03122	2
Biological process	GO:0034285	response to disaccharide	4/1312	0.876339	4	EGP15957;EGP14298;EGP09489;EGP02465	EGP14298	1	EGP15957;EGP09489;EGP02465	3
Biological process	GO:0006892	post-Golgi vesicle-mediated transport	2/1312	0.878669	2	EGP25835;EGP16759	EGP25835;EGP16759	2	--	0
Biological process	GO:0010286	heat acclimation	2/1312	0.878669	2	EGP13100;EGP20060	EGP13100;EGP20060	2	--	0
Biological process	GO:0048868	pollen tube development	11/1312	0.878835	11	EGP31473;EGP12758;EGP28230;EGP31706;EGP12757;EGP18133;EGP06065;EGP04733;EGP16604;novel.1571;EGP03376	EGP12758;EGP28230;EGP12757;EGP18133;EGP06065;EGP04733;EGP16604;novel.1571	8	EGP31473;EGP31706;EGP03376	3
Biological process	GO:0006282	regulation of DNA repair	1/1312	0.880342	1	EGP15680	EGP15680	1	--	0
Biological process	GO:0009144	purine nucleoside triphosphate metabolic process	1/1312	0.880342	1	EGP14223	--	0	EGP14223	1
Biological process	GO:0010103	stomatal complex morphogenesis	1/1312	0.880342	1	EGP20060	EGP20060	1	--	0
Biological process	GO:0032273	positive regulation of protein polymerization	1/1312	0.880342	1	EGP17263	EGP17263	1	--	0
Biological process	GO:0046351	disaccharide biosynthetic process	1/1312	0.880342	1	EGP28121	--	0	EGP28121	1
Biological process	GO:2000024	regulation of leaf development	1/1312	0.880342	1	EGP20751	--	0	EGP20751	1
Biological process	GO:0043161	proteasome-mediated ubiquitin-dependent protein catabolic process	16/1312	0.883535	16	EGP16692;EGP22035;EGP10536;EGP02497;EGP09622;EGP11773;EGP26858;EGP08904;EGP15937;EGP23937;EGP06612;EGP10181;EGP30458;EGP30256;novel.857;EGP10223	EGP16692;EGP22035;EGP10536;EGP09622;EGP11773;EGP26858;EGP15937;EGP06612;EGP10181;EGP30458;EGP30256;novel.857;EGP10223	13	EGP02497;EGP08904;EGP23937	3
Biological process	GO:0000904	cell morphogenesis involved in differentiation	13/1312	0.88516	13	EGP28230;EGP31706;EGP28711;novel.176;EGP06773;EGP18133;EGP06065;EGP04733;EGP11170;EGP03376;EGP26239;EGP11523;EGP00784	EGP28230;EGP28711;novel.176;EGP06773;EGP18133;EGP06065;EGP04733;EGP26239	8	EGP31706;EGP11170;EGP03376;EGP11523;EGP00784	5
Biological process	GO:0006353	DNA-templated transcription, termination	2/1312	0.885247	2	EGP29598;EGP05000	EGP29598	1	EGP05000	1
Biological process	GO:0016236	macroautophagy	2/1312	0.885247	2	EGP10536;novel.857	EGP10536;novel.857	2	--	0
Biological process	GO:0072528	pyrimidine-containing compound biosynthetic process	2/1312	0.885247	2	EGP17030;EGP23939	EGP23939	1	EGP17030	1
Biological process	GO:0051302	regulation of cell division	4/1312	0.88661	4	EGP18355;EGP31975;EGP20060;EGP26239	EGP18355;EGP20060;EGP26239	3	EGP31975	1
Biological process	GO:0051094	positive regulation of developmental process	8/1312	0.886698	8	EGP07168;novel.2203;EGP20751;EGP00176;EGP05747;EGP00889;EGP21606;EGP26512	EGP07168;EGP21606;EGP26512	3	novel.2203;EGP20751;EGP00176;EGP05747;EGP00889	5
Biological process	GO:0051129	negative regulation of cellular component organization	5/1312	0.887585	5	novel.2248;EGP13379;EGP17263;EGP13377;EGP20291	novel.2248;EGP13379;EGP17263	3	EGP13377;EGP20291	2
Biological process	GO:0009648	photoperiodism	9/1312	0.888173	9	EGP28191;EGP04767;EGP25915;EGP11294;novel.2235;novel.1789;EGP07261;EGP31080;EGP16389	EGP28191;EGP04767;EGP07261;EGP16389	4	EGP25915;EGP11294;novel.2235;novel.1789;EGP31080	5
Biological process	GO:0009292	genetic transfer	1/1312	0.888524	1	EGP21592	--	0	EGP21592	1
Biological process	GO:0009294	DNA mediated transformation	1/1312	0.888524	1	EGP21592	--	0	EGP21592	1
Biological process	GO:0044764	multi-organism cellular process	1/1312	0.888524	1	EGP21592	--	0	EGP21592	1
Biological process	GO:0045815	positive regulation of gene expression, epigenetic	1/1312	0.888524	1	EGP19255	--	0	EGP19255	1
Biological process	GO:0071216	cellular response to biotic stimulus	1/1312	0.888524	1	EGP20751	--	0	EGP20751	1
Biological process	GO:0000819	sister chromatid segregation	3/1312	0.888771	3	EGP04675;EGP02878;EGP02877	EGP04675;EGP02878;EGP02877	3	--	0
Biological process	GO:0048573	photoperiodism, flowering	8/1312	0.890438	8	EGP28191;EGP04767;EGP25915;EGP11294;novel.2235;EGP07261;EGP31080;EGP16389	EGP28191;EGP04767;EGP07261;EGP16389	4	EGP25915;EGP11294;novel.2235;EGP31080	4
Biological process	GO:0006473	protein acetylation	4/1312	0.891461	4	EGP13379;EGP02878;EGP02877;EGP20291	EGP13379;EGP02878;EGP02877	3	EGP20291	1
Biological process	GO:0042023	DNA endoreduplication	2/1312	0.891494	2	novel.2248;EGP13377	novel.2248	1	EGP13377	1
Biological process	GO:0060560	developmental growth involved in morphogenesis	21/1312	0.891518	21	EGP31526;EGP31283;EGP28230;EGP19061;EGP31706;EGP00302;EGP25835;EGP18133;EGP18377;EGP06065;EGP20751;EGP33617;EGP10076;EGP11294;EGP04733;EGP03376;EGP19721;EGP14515;EGP11523;EGP31050;EGP31362	EGP31283;EGP28230;EGP19061;EGP25835;EGP18133;EGP18377;EGP06065;EGP33617;EGP04733;EGP19721	10	EGP31526;EGP31706;EGP00302;EGP20751;EGP10076;EGP11294;EGP03376;EGP14515;EGP11523;EGP31050;EGP31362	11
Biological process	GO:0009066	aspartate family amino acid metabolic process	3/1312	0.894052	3	EGP09532;EGP15762;EGP18457	EGP09532;EGP15762;EGP18457	3	--	0
Biological process	GO:0043549	regulation of kinase activity	3/1312	0.894052	3	EGP28222;EGP11464;EGP12517	EGP28222;EGP11464	2	EGP12517	1
Biological process	GO:0009742	brassinosteroid mediated signaling pathway	4/1312	0.896128	4	EGP26007;EGP16572;novel.1818;EGP00531	EGP26007;EGP16572;novel.1818;EGP00531	4	--	0
Biological process	GO:0042176	regulation of protein catabolic process	4/1312	0.896128	4	EGP21890;EGP22444;EGP27814;EGP10223	EGP21890;EGP22444;EGP27814;EGP10223	4	--	0
Biological process	GO:0043401	steroid hormone mediated signaling pathway	4/1312	0.896128	4	EGP26007;EGP16572;novel.1818;EGP00531	EGP26007;EGP16572;novel.1818;EGP00531	4	--	0
Biological process	GO:0048545	response to steroid hormone	4/1312	0.896128	4	EGP26007;EGP16572;novel.1818;EGP00531	EGP26007;EGP16572;novel.1818;EGP00531	4	--	0
Biological process	GO:0051338	regulation of transferase activity	4/1312	0.896128	4	EGP13641;EGP28222;EGP11464;EGP12517	EGP28222;EGP11464	2	EGP13641;EGP12517	2
Biological process	GO:0071383	cellular response to steroid hormone stimulus	4/1312	0.896128	4	EGP26007;EGP16572;novel.1818;EGP00531	EGP26007;EGP16572;novel.1818;EGP00531	4	--	0
Biological process	GO:0031109	microtubule polymerization or depolymerization	1/1312	0.896147	1	EGP28711	EGP28711	1	--	0
Biological process	GO:0051495	positive regulation of cytoskeleton organization	1/1312	0.896147	1	EGP17263	EGP17263	1	--	0
Biological process	GO:1902905	positive regulation of supramolecular fiber organization	1/1312	0.896147	1	EGP17263	EGP17263	1	--	0
Biological process	GO:0009141	nucleoside triphosphate metabolic process	2/1312	0.897423	2	EGP14223;EGP13754	EGP13754	1	EGP14223	1
Biological process	GO:0031056	regulation of histone modification	3/1312	0.899108	3	EGP13379;EGP31804;EGP20291	EGP13379	1	EGP31804;EGP20291	2
Biological process	GO:0061025	membrane fusion	3/1312	0.899108	3	EGP00714;EGP28004;EGP08711	EGP00714;EGP28004;EGP08711	3	--	0
Biological process	GO:0034976	response to endoplasmic reticulum stress	5/1312	0.900445	5	EGP10536;EGP09622;EGP08904;EGP23937;novel.857	EGP10536;EGP09622;novel.857	3	EGP08904;EGP23937	2
Biological process	GO:0000959	mitochondrial RNA metabolic process	4/1312	0.900619	4	EGP15841;EGP15874;EGP15777;novel.2591	EGP15841;EGP15874;EGP15777;novel.2591	4	--	0
Biological process	GO:0006813	potassium ion transport	4/1312	0.900619	4	EGP05605;novel.1053;EGP19614;EGP19721	EGP19614;EGP19721	2	EGP05605;novel.1053	2
Biological process	GO:0071367	cellular response to brassinosteroid stimulus	4/1312	0.900619	4	EGP26007;EGP16572;novel.1818;EGP00531	EGP26007;EGP16572;novel.1818;EGP00531	4	--	0
Biological process	GO:0009247	glycolipid biosynthetic process	2/1312	0.903049	2	EGP33663;EGP02482	EGP33663	1	EGP02482	1
Biological process	GO:0022406	membrane docking	2/1312	0.903049	2	EGP04330;EGP00714	EGP04330;EGP00714	2	--	0
Biological process	GO:0140056	organelle localization by membrane tethering	2/1312	0.903049	2	EGP04330;EGP00714	EGP04330;EGP00714	2	--	0
Biological process	GO:0009567	double fertilization forming a zygote and endosperm	1/1312	0.90325	1	EGP08711	EGP08711	1	--	0
Biological process	GO:0017004	cytochrome complex assembly	1/1312	0.90325	1	novel.2011	--	0	novel.2011	1
Biological process	GO:0043966	histone H3 acetylation	1/1312	0.90325	1	EGP13379	EGP13379	1	--	0
Biological process	GO:1903409	reactive oxygen species biosynthetic process	1/1312	0.90325	1	EGP27612	--	0	EGP27612	1
Biological process	GO:0010638	positive regulation of organelle organization	4/1312	0.904937	4	EGP13379;EGP17263;EGP31804;EGP20291	EGP13379;EGP17263	2	EGP31804;EGP20291	2
Biological process	GO:0140014	mitotic nuclear division	4/1312	0.904937	4	novel.2248;EGP13377;EGP02878;EGP02877	novel.2248;EGP02878;EGP02877	3	EGP13377	1
Biological process	GO:0009793	embryo development ending in seed dormancy	23/1312	0.905259	23	EGP25884;EGP23891;EGP13233;EGP04332;EGP07166;EGP17155;EGP16251;EGP29598;EGP13221;EGP02878;EGP02877;EGP15709;EGP10379;EGP24084;EGP28433;EGP10851;EGP26511;EGP33734;EGP26239;EGP33452;EGP32338;EGP09489;EGP10515	EGP25884;EGP23891;EGP13233;EGP04332;EGP07166;EGP17155;EGP16251;EGP29598;EGP13221;EGP02878;EGP02877;EGP15709;EGP24084;EGP26511;EGP33734;EGP26239;EGP32338	17	EGP10379;EGP28433;EGP10851;EGP33452;EGP09489;EGP10515	6
Biological process	GO:0018193	peptidyl-amino acid modification	26/1312	0.906488	26	EGP12188;EGP13379;EGP19307;EGP31292;EGP31632;EGP13100;EGP29841;EGP09526;EGP15957;EGP28764;EGP10481;EGP19302;EGP33617;EGP11089;EGP21154;EGP03048;EGP33440;EGP15832;EGP13609;EGP15896;EGP31655;EGP30697;EGP21129;EGP20291;EGP01578;EGP10515	EGP13379;EGP19307;EGP31292;EGP31632;EGP13100;EGP29841;EGP09526;EGP28764;EGP10481;EGP19302;EGP33617;EGP11089;EGP21154;EGP03048;EGP33440;EGP13609;EGP15896;EGP31655;EGP30697;EGP21129;EGP01578	21	EGP12188;EGP15957;EGP15832;EGP20291;EGP10515	5
Biological process	GO:0000070	mitotic sister chromatid segregation	2/1312	0.908386	2	EGP02878;EGP02877	EGP02878;EGP02877	2	--	0
Biological process	GO:0000097	sulfur amino acid biosynthetic process	2/1312	0.908386	2	EGP05229;EGP30646	EGP05229	1	EGP30646	1
Biological process	GO:1901264	carbohydrate derivative transport	2/1312	0.908386	2	EGP13201;EGP02446	EGP02446	1	EGP13201	1
Biological process	GO:0045132	meiotic chromosome segregation	3/1312	0.908571	3	EGP02878;EGP02877;EGP17260	EGP02878;EGP02877;EGP17260	3	--	0
Biological process	GO:0048588	developmental cell growth	10/1312	0.908905	10	EGP28230;EGP31706;EGP25835;EGP18133;EGP06065;EGP04733;EGP03376;EGP19721;EGP14515;EGP11523	EGP28230;EGP25835;EGP18133;EGP06065;EGP04733;EGP19721	6	EGP31706;EGP03376;EGP14515;EGP11523	4
Biological process	GO:0006084	acetyl-CoA metabolic process	1/1312	0.909866	1	EGP24324	--	0	EGP24324	1
Biological process	GO:0007264	small GTPase mediated signal transduction	1/1312	0.909866	1	EGP28230	EGP28230	1	--	0
Biological process	GO:0009112	nucleobase metabolic process	1/1312	0.909866	1	EGP04894	EGP04894	1	--	0
Biological process	GO:0009765	photosynthesis, light harvesting	1/1312	0.909866	1	EGP19984	--	0	EGP19984	1
Biological process	GO:0010105	negative regulation of ethylene-activated signaling pathway	1/1312	0.909866	1	EGP14515	--	0	EGP14515	1
Biological process	GO:0016482	cytosolic transport	1/1312	0.909866	1	EGP00220	EGP00220	1	--	0
Biological process	GO:0032436	positive regulation of proteasomal ubiquitin-dependent protein catabolic process	1/1312	0.909866	1	EGP10223	EGP10223	1	--	0
Biological process	GO:0051261	protein depolymerization	1/1312	0.909866	1	EGP17263	EGP17263	1	--	0
Biological process	GO:0051865	protein autoubiquitination	1/1312	0.909866	1	EGP22035	EGP22035	1	--	0
Biological process	GO:0070298	negative regulation of phosphorelay signal transduction system	1/1312	0.909866	1	EGP14515	--	0	EGP14515	1
Biological process	GO:1902182	shoot apical meristem development	1/1312	0.909866	1	EGP20751	--	0	EGP20751	1
Biological process	GO:0009260	ribonucleotide biosynthetic process	6/1312	0.912698	6	EGP25884;EGP14223;EGP19038;EGP04894;novel.1884;EGP24324	EGP25884;EGP19038;EGP04894	3	EGP14223;novel.1884;EGP24324	3
Biological process	GO:0050776	regulation of immune response	6/1312	0.912698	6	EGP08934;EGP08936;EGP26278;EGP07261;EGP31080;EGP16389	EGP08936;EGP26278;EGP07261;EGP16389	4	EGP08934;EGP31080	2
Biological process	GO:0048831	regulation of shoot system development	10/1312	0.914544	10	EGP30794;EGP26174;EGP26667;EGP13042;EGP20751;EGP25915;EGP33166;novel.2235;EGP04218;EGP08799	EGP30794;EGP26174;EGP26667;EGP13042;EGP33166;EGP04218;EGP08799	7	EGP20751;EGP25915;novel.2235	3
Biological process	GO:0010498	proteasomal protein catabolic process	16/1312	0.914682	16	EGP16692;EGP22035;EGP10536;EGP02497;EGP09622;EGP11773;EGP26858;EGP08904;EGP15937;EGP23937;EGP06612;EGP10181;EGP30458;EGP30256;novel.857;EGP10223	EGP16692;EGP22035;EGP10536;EGP09622;EGP11773;EGP26858;EGP15937;EGP06612;EGP10181;EGP30458;EGP30256;novel.857;EGP10223	13	EGP02497;EGP08904;EGP23937	3
Biological process	GO:0009566	fertilization	1/1312	0.916031	1	EGP08711	EGP08711	1	--	0
Biological process	GO:0009616	RNAi-mediated antiviral immune response	1/1312	0.916031	1	EGP07024	EGP07024	1	--	0
Biological process	GO:0009826	unidimensional cell growth	17/1312	0.916902	17	EGP31526;EGP31283;EGP28230;EGP19061;EGP31706;EGP00302;EGP18133;EGP18377;EGP06065;EGP20751;EGP33617;EGP10076;EGP11294;EGP04733;EGP03376;EGP31050;EGP31362	EGP31283;EGP28230;EGP19061;EGP18133;EGP18377;EGP06065;EGP33617;EGP04733	8	EGP31526;EGP31706;EGP00302;EGP20751;EGP10076;EGP11294;EGP03376;EGP31050;EGP31362	9
Biological process	GO:0005982	starch metabolic process	3/1312	0.917222	3	EGP10096;EGP13890;EGP19523	EGP10096;EGP19523	2	EGP13890	1
Biological process	GO:0080188	gene silencing by RNA-directed DNA methylation	3/1312	0.917222	3	EGP19307;EGP16744;EGP19302	EGP19307;EGP16744;EGP19302	3	--	0
Biological process	GO:0140458	pre-transcriptional gene silencing by RNA	3/1312	0.917222	3	EGP19307;EGP16744;EGP19302	EGP19307;EGP16744;EGP19302	3	--	0
Biological process	GO:0002218	activation of innate immune response	2/1312	0.918244	2	EGP26278;EGP31080	EGP26278	1	EGP31080	1
Biological process	GO:0006664	glycolipid metabolic process	2/1312	0.918244	2	EGP33663;EGP02482	EGP33663	1	EGP02482	1
Biological process	GO:1903509	liposaccharide metabolic process	2/1312	0.918244	2	EGP33663;EGP02482	EGP33663	1	EGP02482	1
Biological process	GO:0022604	regulation of cell morphogenesis	5/1312	0.919045	5	EGP31526;EGP18133;EGP20751;EGP10076;EGP31362	EGP18133	1	EGP31526;EGP20751;EGP10076;EGP31362	4
Biological process	GO:0046390	ribose phosphate biosynthetic process	6/1312	0.919254	6	EGP25884;EGP14223;EGP19038;EGP04894;novel.1884;EGP24324	EGP25884;EGP19038;EGP04894	3	EGP14223;novel.1884;EGP24324	3
Biological process	GO:0009555	pollen development	19/1312	0.919335	19	EGP13379;EGP08897;EGP16692;EGP04614;EGP13233;EGP02677;EGP15937;EGP17155;EGP33648;EGP25937;EGP10076;EGP13201;EGP20726;EGP24496;EGP15718;EGP03376;EGP27167;EGP09875;EGP31362	EGP13379;EGP08897;EGP16692;EGP04614;EGP13233;EGP02677;EGP15937;EGP17155;EGP33648;EGP25937;EGP20726;EGP15718;EGP27167;EGP09875	14	EGP10076;EGP13201;EGP24496;EGP03376;EGP31362	5
Biological process	GO:0006305	DNA alkylation	4/1312	0.92059	4	EGP19307;EGP19302;EGP13609;EGP15680	EGP19307;EGP19302;EGP13609;EGP15680	4	--	0
Biological process	GO:0006306	DNA methylation	4/1312	0.92059	4	EGP19307;EGP19302;EGP13609;EGP15680	EGP19307;EGP19302;EGP13609;EGP15680	4	--	0
Biological process	GO:0009060	aerobic respiration	3/1312	0.921262	3	EGP10670;EGP16251;EGP16604	EGP10670;EGP16251;EGP16604	3	--	0
Biological process	GO:0000122	negative regulation of transcription by RNA polymerase II	1/1312	0.921774	1	EGP00667	--	0	EGP00667	1
Biological process	GO:0007029	endoplasmic reticulum organization	1/1312	0.921774	1	EGP04330	EGP04330	1	--	0
Biological process	GO:0010584	pollen exine formation	1/1312	0.921774	1	EGP17155	EGP17155	1	--	0
Biological process	GO:0030041	actin filament polymerization	1/1312	0.921774	1	EGP17263	EGP17263	1	--	0
Biological process	GO:0030833	regulation of actin filament polymerization	1/1312	0.921774	1	EGP17263	EGP17263	1	--	0
Biological process	GO:2000060	positive regulation of ubiquitin-dependent protein catabolic process	1/1312	0.921774	1	EGP10223	EGP10223	1	--	0
Biological process	GO:0001510	RNA methylation	2/1312	0.922791	2	EGP06872;EGP06871	EGP06872	1	EGP06871	1
Biological process	GO:0031331	positive regulation of cellular catabolic process	2/1312	0.922791	2	EGP05286;EGP10223	EGP05286;EGP10223	2	--	0
Biological process	GO:0008652	cellular amino acid biosynthetic process	13/1312	0.92293	13	EGP16108;EGP13233;EGP04332;EGP05229;EGP30646;EGP06849;novel.2410;EGP09532;EGP27512;EGP15762;EGP18457;EGP09347;EGP16106	EGP13233;EGP04332;EGP05229;EGP06849;novel.2410;EGP09532;EGP27512;EGP15762;EGP18457;EGP09347	10	EGP16108;EGP30646;EGP16106	3
Biological process	GO:0045088	regulation of innate immune response	4/1312	0.924123	4	EGP26278;EGP07261;EGP31080;EGP16389	EGP26278;EGP07261;EGP16389	3	EGP31080	1
Biological process	GO:0032984	protein-containing complex disassembly	3/1312	0.92512	3	EGP17263;EGP10536;novel.857	EGP17263;EGP10536;novel.857	3	--	0
Biological process	GO:0000226	microtubule cytoskeleton organization	7/1312	0.926245	7	EGP18770;EGP03122;EGP10536;EGP28711;EGP04165;EGP20726;novel.857	EGP10536;EGP28711;EGP20726;novel.857	4	EGP18770;EGP03122;EGP04165	3
Biological process	GO:0000902	cell morphogenesis	24/1312	0.927044	24	EGP31526;EGP31283;EGP28230;EGP19061;EGP31706;EGP00302;EGP28711;novel.176;EGP06773;EGP18133;EGP18377;EGP06065;EGP20751;EGP33617;EGP10076;EGP11294;EGP04733;EGP11170;EGP03376;EGP26239;EGP11523;EGP00784;EGP31050;EGP31362	EGP31283;EGP28230;EGP19061;EGP28711;novel.176;EGP06773;EGP18133;EGP18377;EGP06065;EGP33617;EGP04733;EGP26239	12	EGP31526;EGP31706;EGP00302;EGP20751;EGP10076;EGP11294;EGP11170;EGP03376;EGP11523;EGP00784;EGP31050;EGP31362	12
Biological process	GO:0031048	heterochromatin assembly by small RNA	2/1312	0.927098	2	EGP19307;EGP19302	EGP19307;EGP19302	2	--	0
Biological process	GO:0072507	divalent inorganic cation homeostasis	2/1312	0.927098	2	EGP21158;EGP30372	EGP21158	1	EGP30372	1
Biological process	GO:0009082	branched-chain amino acid biosynthetic process	1/1312	0.927125	1	EGP18457	EGP18457	1	--	0
Biological process	GO:0009199	ribonucleoside triphosphate metabolic process	1/1312	0.927125	1	EGP14223	--	0	EGP14223	1
Biological process	GO:0009201	ribonucleoside triphosphate biosynthetic process	1/1312	0.927125	1	EGP14223	--	0	EGP14223	1
Biological process	GO:0032434	regulation of proteasomal ubiquitin-dependent protein catabolic process	1/1312	0.927125	1	EGP10223	EGP10223	1	--	0
Biological process	GO:0051568	histone H3-K4 methylation	1/1312	0.927125	1	EGP20291	--	0	EGP20291	1
Biological process	GO:0070588	calcium ion transmembrane transport	1/1312	0.927125	1	EGP30372	--	0	EGP30372	1
Biological process	GO:1901800	positive regulation of proteasomal protein catabolic process	1/1312	0.927125	1	EGP10223	EGP10223	1	--	0
Biological process	GO:2001020	regulation of response to DNA damage stimulus	1/1312	0.927125	1	EGP15680	EGP15680	1	--	0
Biological process	GO:0009860	pollen tube growth	6/1312	0.92828	6	EGP28230;EGP31706;EGP18133;EGP06065;EGP04733;EGP03376	EGP28230;EGP18133;EGP06065;EGP04733	4	EGP31706;EGP03376	2
Biological process	GO:0009790	embryo development	25/1312	0.93087	25	EGP25884;EGP23891;EGP13233;EGP04332;EGP07166;EGP17155;EGP16251;EGP29598;EGP13221;EGP02878;EGP02877;EGP20751;EGP15709;EGP10379;EGP24084;EGP28433;EGP10851;EGP26511;EGP33734;EGP26239;EGP33452;EGP32338;EGP09489;EGP31072;EGP10515	EGP25884;EGP23891;EGP13233;EGP04332;EGP07166;EGP17155;EGP16251;EGP29598;EGP13221;EGP02878;EGP02877;EGP15709;EGP24084;EGP26511;EGP33734;EGP26239;EGP32338;EGP31072	18	EGP20751;EGP10379;EGP28433;EGP10851;EGP33452;EGP09489;EGP10515	7
Biological process	GO:0007051	spindle organization	2/1312	0.931178	2	EGP10536;novel.857	EGP10536;novel.857	2	--	0
Biological process	GO:0045089	positive regulation of innate immune response	2/1312	0.931178	2	EGP26278;EGP31080	EGP26278	1	EGP31080	1
Biological process	GO:0008064	regulation of actin polymerization or depolymerization	1/1312	0.93211	1	EGP17263	EGP17263	1	--	0
Biological process	GO:0010014	meristem initiation	1/1312	0.93211	1	EGP25884	EGP25884	1	--	0
Biological process	GO:0030832	regulation of actin filament length	1/1312	0.93211	1	EGP17263	EGP17263	1	--	0
Biological process	GO:0110053	regulation of actin filament organization	1/1312	0.93211	1	EGP17263	EGP17263	1	--	0
Biological process	GO:0009909	regulation of flower development	9/1312	0.932148	9	EGP30794;EGP26174;EGP26667;EGP13042;EGP20751;EGP25915;novel.2235;EGP04218;EGP08799	EGP30794;EGP26174;EGP26667;EGP13042;EGP04218;EGP08799	6	EGP20751;EGP25915;novel.2235	3
Biological process	GO:2000028	regulation of photoperiodism, flowering	3/1312	0.932322	3	EGP25915;EGP07261;EGP16389	EGP07261;EGP16389	2	EGP25915	1
Biological process	GO:0032270	positive regulation of cellular protein metabolic process	6/1312	0.933793	6	EGP13379;EGP14208;EGP10289;EGP31804;EGP10223;EGP20291	EGP13379;EGP10289;EGP10223	3	EGP14208;EGP31804;EGP20291	3
Biological process	GO:0006261	DNA-dependent DNA replication	7/1312	0.934146	7	novel.2248;EGP25428;EGP13377;EGP20739;novel.1650;novel.1855;EGP15437	novel.2248;EGP25428;novel.1650;novel.1855	4	EGP13377;EGP20739;EGP15437	3
Biological process	GO:0006890	retrograde vesicle-mediated transport, Golgi to endoplasmic reticulum	1/1312	0.936754	1	EGP00220	EGP00220	1	--	0
Biological process	GO:0019253	reductive pentose-phosphate cycle	1/1312	0.936754	1	EGP15957	--	0	EGP15957	1
Biological process	GO:0019432	triglyceride biosynthetic process	1/1312	0.936754	1	EGP06308	--	0	EGP06308	1
Biological process	GO:0019685	photosynthesis, dark reaction	1/1312	0.936754	1	EGP15957	--	0	EGP15957	1
Biological process	GO:0030422	production of siRNA involved in RNA interference	4/1312	0.936885	4	EGP19307;EGP00333;EGP19302;EGP07024	EGP19307;EGP00333;EGP19302;EGP07024	4	--	0
Biological process	GO:0009642	response to light intensity	5/1312	0.937261	5	EGP09169;EGP11580;EGP02432;EGP00513;EGP31080	EGP09169;EGP11580	2	EGP02432;EGP00513;EGP31080	3
Biological process	GO:0006260	DNA replication	10/1312	0.938495	10	novel.2248;EGP25428;EGP13377;EGP20739;novel.1650;EGP12517;EGP02878;EGP02877;novel.1855;EGP15437	novel.2248;EGP25428;novel.1650;EGP02878;EGP02877;novel.1855	6	EGP13377;EGP20739;EGP12517;EGP15437	4
Biological process	GO:0031507	heterochromatin assembly	3/1312	0.938881	3	EGP19307;EGP19302;EGP13609	EGP19307;EGP19302;EGP13609	3	--	0
Biological process	GO:0044772	mitotic cell cycle phase transition	3/1312	0.938881	3	EGP10090;EGP30715;EGP28222	EGP10090;EGP28222	2	EGP30715	1
Biological process	GO:0006479	protein methylation	6/1312	0.938926	6	EGP13379;EGP19307;EGP19302;EGP13609;EGP30697;EGP20291	EGP13379;EGP19307;EGP19302;EGP13609;EGP30697	5	EGP20291	1
Biological process	GO:0008213	protein alkylation	6/1312	0.938926	6	EGP13379;EGP19307;EGP19302;EGP13609;EGP30697;EGP20291	EGP13379;EGP19307;EGP19302;EGP13609;EGP30697	5	EGP20291	1
Biological process	GO:0000280	nuclear division	10/1312	0.940535	10	novel.2248;EGP13379;EGP31754;EGP13377;EGP30715;EGP33648;EGP02878;novel.775;EGP02877;EGP17260	novel.2248;EGP13379;EGP31754;EGP33648;EGP02878;novel.775;EGP02877;EGP17260	8	EGP13377;EGP30715	2
Biological process	GO:0009312	oligosaccharide biosynthetic process	1/1312	0.941081	1	EGP28121	--	0	EGP28121	1
Biological process	GO:0016553	base conversion or substitution editing	1/1312	0.941081	1	EGP05421	EGP05421	1	--	0
Biological process	GO:0044743	protein transmembrane import into intracellular organelle	1/1312	0.941081	1	EGP13595	--	0	EGP13595	1
Biological process	GO:1903052	positive regulation of proteolysis involved in cellular protein catabolic process	1/1312	0.941081	1	EGP10223	EGP10223	1	--	0
Biological process	GO:1903364	positive regulation of cellular protein catabolic process	1/1312	0.941081	1	EGP10223	EGP10223	1	--	0
Biological process	GO:2000058	regulation of ubiquitin-dependent protein catabolic process	1/1312	0.941081	1	EGP10223	EGP10223	1	--	0
Biological process	GO:0070192	chromosome organization involved in meiotic cell cycle	2/1312	0.942158	2	EGP02878;EGP02877	EGP02878;EGP02877	2	--	0
Biological process	GO:0016571	histone methylation	5/1312	0.942461	5	EGP13379;EGP19307;EGP19302;EGP13609;EGP20291	EGP13379;EGP19307;EGP19302;EGP13609	4	EGP20291	1
Biological process	GO:0051345	positive regulation of hydrolase activity	3/1312	0.944847	3	EGP28230;EGP11282;EGP26639	EGP28230	1	EGP11282;EGP26639	2
Biological process	GO:0002757	immune response-activating signal transduction	1/1312	0.945112	1	EGP26278	EGP26278	1	--	0
Biological process	GO:0002758	innate immune response-activating signal transduction	1/1312	0.945112	1	EGP26278	EGP26278	1	--	0
Biological process	GO:0002764	immune response-regulating signaling pathway	1/1312	0.945112	1	EGP26278	EGP26278	1	--	0
Biological process	GO:0045862	positive regulation of proteolysis	1/1312	0.945112	1	EGP10223	EGP10223	1	--	0
Biological process	GO:0061136	regulation of proteasomal protein catabolic process	1/1312	0.945112	1	EGP10223	EGP10223	1	--	0
Biological process	GO:0009767	photosynthetic electron transport chain	2/1312	0.945432	2	EGP05853;EGP23032	EGP23032	1	EGP05853	1
Biological process	GO:1902531	regulation of intracellular signal transduction	2/1312	0.945432	2	EGP28230;EGP14515	EGP28230	1	EGP14515	1
Biological process	GO:0043085	positive regulation of catalytic activity	6/1312	0.945963	6	EGP28230;EGP13641;EGP08904;EGP11282;EGP23937;EGP26639	EGP28230	1	EGP13641;EGP08904;EGP11282;EGP23937;EGP26639	5
Biological process	GO:0045944	positive regulation of transcription by RNA polymerase II	9/1312	0.946927	9	EGP22149;EGP08659;EGP05135;EGP28688;EGP27005;EGP20185;EGP33178;EGP23801;EGP20291	EGP28688;EGP27005;EGP33178	3	EGP22149;EGP08659;EGP05135;EGP20185;EGP23801;EGP20291	6
Biological process	GO:0019318	hexose metabolic process	5/1312	0.947269	5	EGP25953;EGP04779;EGP04557;EGP31011;EGP28107	EGP25953;EGP04557;EGP28107	3	EGP04779;EGP31011	2
Biological process	GO:0006342	chromatin silencing	3/1312	0.947623	3	EGP19307;EGP19302;EGP15680	EGP19307;EGP19302;EGP15680	3	--	0
Biological process	GO:0006897	endocytosis	4/1312	0.947665	4	EGP12188;EGP28004;EGP06065;EGP00718	EGP28004;EGP06065	2	EGP12188;EGP00718	2
Biological process	GO:0006220	pyrimidine nucleotide metabolic process	1/1312	0.948867	1	EGP13754	EGP13754	1	--	0
Biological process	GO:0006413	translational initiation	1/1312	0.948867	1	EGP20623	--	0	EGP20623	1
Biological process	GO:0006635	fatty acid beta-oxidation	1/1312	0.948867	1	EGP33690	EGP33690	1	--	0
Biological process	GO:0006874	cellular calcium ion homeostasis	1/1312	0.948867	1	EGP30372	--	0	EGP30372	1
Biological process	GO:0010104	regulation of ethylene-activated signaling pathway	1/1312	0.948867	1	EGP14515	--	0	EGP14515	1
Biological process	GO:0031334	positive regulation of protein-containing complex assembly	1/1312	0.948867	1	EGP17263	EGP17263	1	--	0
Biological process	GO:0048278	vesicle docking	1/1312	0.948867	1	EGP00714	EGP00714	1	--	0
Biological process	GO:0055074	calcium ion homeostasis	1/1312	0.948867	1	EGP30372	--	0	EGP30372	1
Biological process	GO:0070297	regulation of phosphorelay signal transduction system	1/1312	0.948867	1	EGP14515	--	0	EGP14515	1
Biological process	GO:0009658	chloroplast organization	12/1312	0.949463	12	EGP13176;EGP16251;EGP29598;EGP04894;novel.1592;EGP06934;EGP26062;EGP28022;EGP10359;novel.2026;EGP05000;EGP16209	EGP13176;EGP16251;EGP29598;EGP04894;EGP06934;EGP26062;EGP28022	7	novel.1592;EGP10359;novel.2026;EGP05000;EGP16209	5
Biological process	GO:0043094	cellular metabolic compound salvage	4/1312	0.950083	4	EGP19038;EGP06150;novel.1884;EGP22956	EGP19038;EGP06150	2	novel.1884;EGP22956	2
Biological process	GO:0006520	cellular amino acid metabolic process	24/1312	0.951533	24	EGP24622;EGP04665;EGP31475;EGP16108;EGP13233;EGP04332;EGP00684;EGP05229;EGP30646;EGP02960;EGP04894;novel.2017;EGP06849;EGP01212;novel.2410;EGP09532;EGP27512;EGP25423;EGP33757;EGP15762;EGP18457;EGP21129;EGP09347;EGP16106	EGP24622;EGP04665;EGP13233;EGP04332;EGP00684;EGP05229;EGP02960;EGP04894;EGP06849;novel.2410;EGP09532;EGP27512;EGP25423;EGP15762;EGP18457;EGP21129;EGP09347	17	EGP31475;EGP16108;EGP30646;novel.2017;EGP01212;EGP33757;EGP16106	7
Biological process	GO:0009142	nucleoside triphosphate biosynthetic process	1/1312	0.952366	1	EGP14223	--	0	EGP14223	1
Biological process	GO:0032271	regulation of protein polymerization	1/1312	0.952366	1	EGP17263	EGP17263	1	--	0
Biological process	GO:0044247	cellular polysaccharide catabolic process	1/1312	0.952366	1	EGP06995	EGP06995	1	--	0
Biological process	GO:0016556	mRNA modification	4/1312	0.952397	4	EGP15841;EGP15874;EGP15777;novel.2591	EGP15841;EGP15874;EGP15777;novel.2591	4	--	0
Biological process	GO:0033865	nucleoside bisphosphate metabolic process	3/1312	0.952788	3	EGP25884;EGP24324;EGP30785	EGP25884;EGP30785	2	EGP24324	1
Biological process	GO:0033875	ribonucleoside bisphosphate metabolic process	3/1312	0.952788	3	EGP25884;EGP24324;EGP30785	EGP25884;EGP30785	2	EGP24324	1
Biological process	GO:0034032	purine nucleoside bisphosphate metabolic process	3/1312	0.952788	3	EGP25884;EGP24324;EGP30785	EGP25884;EGP30785	2	EGP24324	1
Biological process	GO:0044770	cell cycle phase transition	3/1312	0.952788	3	EGP10090;EGP30715;EGP28222	EGP10090;EGP28222	2	EGP30715	1
Biological process	GO:0006643	membrane lipid metabolic process	4/1312	0.954613	4	EGP12462;EGP33663;EGP26487;EGP02482	EGP12462;EGP33663	2	EGP26487;EGP02482	2
Biological process	GO:0051130	positive regulation of cellular component organization	4/1312	0.954613	4	EGP13379;EGP17263;EGP31804;EGP20291	EGP13379;EGP17263	2	EGP31804;EGP20291	2
Biological process	GO:0006914	autophagy	3/1312	0.955189	3	EGP05286;EGP10536;novel.857	EGP05286;EGP10536;novel.857	3	--	0
Biological process	GO:0061919	process utilizing autophagic mechanism	3/1312	0.955189	3	EGP05286;EGP10536;novel.857	EGP05286;EGP10536;novel.857	3	--	0
Biological process	GO:0000741	karyogamy	1/1312	0.955625	1	EGP15275	EGP15275	1	--	0
Biological process	GO:0006406	mRNA export from nucleus	1/1312	0.955625	1	EGP25720	EGP25720	1	--	0
Biological process	GO:0006626	protein targeting to mitochondrion	1/1312	0.955625	1	EGP13595	--	0	EGP13595	1
Biological process	GO:0010197	polar nucleus fusion	1/1312	0.955625	1	EGP15275	EGP15275	1	--	0
Biological process	GO:0071427	mRNA-containing ribonucleoprotein complex export from nucleus	1/1312	0.955625	1	EGP25720	EGP25720	1	--	0
Biological process	GO:0006637	acyl-CoA metabolic process	2/1312	0.956846	2	EGP25884;EGP24324	EGP25884	1	EGP24324	1
Biological process	GO:0035383	thioester metabolic process	2/1312	0.956846	2	EGP25884;EGP24324	EGP25884	1	EGP24324	1
Biological process	GO:1990542	mitochondrial transmembrane transport	2/1312	0.956846	2	EGP33363;EGP13595	EGP33363	1	EGP13595	1
Biological process	GO:2000243	positive regulation of reproductive process	2/1312	0.956846	2	EGP13379;EGP05747	EGP13379	1	EGP05747	1
Biological process	GO:0065004	protein-DNA complex assembly	5/1312	0.957737	5	EGP02828;EGP21456;novel.1650;novel.1398;EGP20291	EGP02828;EGP21456;novel.1650;novel.1398	4	EGP20291	1
Biological process	GO:0006891	intra-Golgi vesicle-mediated transport	1/1312	0.958662	1	EGP00220	EGP00220	1	--	0
Biological process	GO:0009251	glucan catabolic process	1/1312	0.958662	1	EGP06995	EGP06995	1	--	0
Biological process	GO:1903050	regulation of proteolysis involved in cellular protein catabolic process	1/1312	0.958662	1	EGP10223	EGP10223	1	--	0
Biological process	GO:1903362	regulation of cellular protein catabolic process	1/1312	0.958662	1	EGP10223	EGP10223	1	--	0
Biological process	GO:0031503	protein-containing complex localization	2/1312	0.959321	2	EGP25720;EGP14030	EGP25720;EGP14030	2	--	0
Biological process	GO:0022618	ribonucleoprotein complex assembly	5/1312	0.959587	5	EGP28117;novel.1605;EGP30198;EGP30199;EGP05675	EGP28117	1	novel.1605;EGP30198;EGP30199;EGP05675	4
Biological process	GO:0045814	negative regulation of gene expression, epigenetic	3/1312	0.959651	3	EGP19307;EGP19302;EGP15680	EGP19307;EGP19302;EGP15680	3	--	0
Biological process	GO:0070828	heterochromatin organization	3/1312	0.959651	3	EGP19307;EGP19302;EGP13609	EGP19307;EGP19302;EGP13609	3	--	0
Biological process	GO:0006004	fucose metabolic process	1/1312	0.961491	1	EGP04779	--	0	EGP04779	1
Biological process	GO:0043547	positive regulation of GTPase activity	2/1312	0.961659	2	EGP28230;EGP26639	EGP28230	1	EGP26639	1
Biological process	GO:0045892	negative regulation of transcription, DNA-templated	18/1312	0.962263	18	EGP19307;EGP19061;EGP00667;EGP13443;EGP03181;EGP06849;EGP19302;EGP20751;EGP06600;EGP09921;EGP13609;EGP31061;EGP00531;EGP08799;EGP09489;EGP20291;EGP09347;EGP15680	EGP19307;EGP19061;EGP13443;EGP03181;EGP06849;EGP19302;EGP06600;EGP09921;EGP13609;EGP00531;EGP08799;EGP09347;EGP15680	13	EGP00667;EGP20751;EGP31061;EGP09489;EGP20291	5
Biological process	GO:0006839	mitochondrial transport	3/1312	0.963693	3	EGP24154;EGP33363;EGP13595	EGP24154;EGP33363	2	EGP13595	1
Biological process	GO:0009846	pollen germination	3/1312	0.963693	3	EGP28230;EGP03376;EGP28558	EGP28230;EGP28558	2	EGP03376	1
Biological process	GO:0140053	mitochondrial gene expression	2/1312	0.963867	2	EGP14208;novel.982	--	0	EGP14208;novel.982	2
Biological process	GO:0006641	triglyceride metabolic process	1/1312	0.964126	1	EGP06308	--	0	EGP06308	1
Biological process	GO:0032956	regulation of actin cytoskeleton organization	1/1312	0.964126	1	EGP17263	EGP17263	1	--	0
Biological process	GO:0032970	regulation of actin filament-based process	1/1312	0.964126	1	EGP17263	EGP17263	1	--	0
Biological process	GO:0044030	regulation of DNA methylation	1/1312	0.964126	1	EGP13609	EGP13609	1	--	0
Biological process	GO:1902903	regulation of supramolecular fiber organization	1/1312	0.964126	1	EGP17263	EGP17263	1	--	0
Biological process	GO:0002682	regulation of immune system process	6/1312	0.964463	6	EGP08934;EGP08936;EGP26278;EGP07261;EGP31080;EGP16389	EGP08936;EGP26278;EGP07261;EGP16389	4	EGP08934;EGP31080	2
Biological process	GO:0051247	positive regulation of protein metabolic process	6/1312	0.964463	6	EGP13379;EGP14208;EGP10289;EGP31804;EGP10223;EGP20291	EGP13379;EGP10289;EGP10223	3	EGP14208;EGP31804;EGP20291	3
Biological process	GO:0009165	nucleotide biosynthetic process	7/1312	0.964921	7	EGP25884;EGP14223;EGP19038;EGP06150;EGP04894;novel.1884;EGP24324	EGP25884;EGP19038;EGP06150;EGP04894	4	EGP14223;novel.1884;EGP24324	3
Biological process	GO:1902679	negative regulation of RNA biosynthetic process	18/1312	0.965393	18	EGP19307;EGP19061;EGP00667;EGP13443;EGP03181;EGP06849;EGP19302;EGP20751;EGP06600;EGP09921;EGP13609;EGP31061;EGP00531;EGP08799;EGP09489;EGP20291;EGP09347;EGP15680	EGP19307;EGP19061;EGP13443;EGP03181;EGP06849;EGP19302;EGP06600;EGP09921;EGP13609;EGP00531;EGP08799;EGP09347;EGP15680	13	EGP00667;EGP20751;EGP31061;EGP09489;EGP20291	5
Biological process	GO:1903507	negative regulation of nucleic acid-templated transcription	18/1312	0.965393	18	EGP19307;EGP19061;EGP00667;EGP13443;EGP03181;EGP06849;EGP19302;EGP20751;EGP06600;EGP09921;EGP13609;EGP31061;EGP00531;EGP08799;EGP09489;EGP20291;EGP09347;EGP15680	EGP19307;EGP19061;EGP13443;EGP03181;EGP06849;EGP19302;EGP06600;EGP09921;EGP13609;EGP00531;EGP08799;EGP09347;EGP15680	13	EGP00667;EGP20751;EGP31061;EGP09489;EGP20291	5
Biological process	GO:0022603	regulation of anatomical structure morphogenesis	8/1312	0.965826	8	EGP07168;EGP31526;EGP18133;EGP20751;EGP10076;EGP20060;novel.1702;EGP31362	EGP07168;EGP18133;EGP20060;novel.1702	4	EGP31526;EGP20751;EGP10076;EGP31362	4
Biological process	GO:0009062	fatty acid catabolic process	1/1312	0.966581	1	EGP33690	EGP33690	1	--	0
Biological process	GO:0051304	chromosome separation	1/1312	0.966581	1	EGP17260	EGP17260	1	--	0
Biological process	GO:0070585	protein localization to mitochondrion	1/1312	0.966581	1	EGP13595	--	0	EGP13595	1
Biological process	GO:0072655	establishment of protein localization to mitochondrion	1/1312	0.966581	1	EGP13595	--	0	EGP13595	1
Biological process	GO:1901293	nucleoside phosphate biosynthetic process	7/1312	0.967669	7	EGP25884;EGP14223;EGP19038;EGP06150;EGP04894;novel.1884;EGP24324	EGP25884;EGP19038;EGP06150;EGP04894	4	EGP14223;novel.1884;EGP24324	3
Biological process	GO:0009896	positive regulation of catabolic process	2/1312	0.967923	2	EGP05286;EGP10223	EGP05286;EGP10223	2	--	0
Biological process	GO:0044270	cellular nitrogen compound catabolic process	10/1312	0.968371	10	EGP01597;EGP05874;EGP13754;EGP21563;EGP16486;EGP33762;EGP18900;novel.1560;EGP17014;EGP33822	EGP13754;EGP21563;EGP16486;novel.1560;EGP33822	5	EGP01597;EGP05874;EGP33762;EGP18900;EGP17014	5
Biological process	GO:0032268	regulation of cellular protein metabolic process	21/1312	0.968623	21	EGP13379;EGP19307;EGP14208;EGP10289;EGP17805;EGP20657;EGP16278;EGP18709;EGP28222;EGP11464;EGP19302;EGP12517;EGP18281;EGP31804;EGP13603;EGP03397;EGP16279;EGP28526;EGP28539;EGP10223;EGP20291	EGP13379;EGP19307;EGP10289;EGP16278;EGP18709;EGP28222;EGP11464;EGP19302;EGP18281;EGP13603;EGP03397;EGP16279;EGP28526;EGP28539;EGP10223	15	EGP14208;EGP17805;EGP20657;EGP12517;EGP31804;EGP20291	6
Biological process	GO:0051246	regulation of protein metabolic process	24/1312	0.968623	24	EGP13379;EGP19307;EGP14208;EGP10289;EGP17805;EGP20657;EGP16278;EGP18709;EGP28222;EGP11464;EGP19302;EGP12517;EGP21890;EGP18281;EGP22444;EGP31804;EGP13603;EGP27814;EGP03397;EGP16279;EGP28526;EGP28539;EGP10223;EGP20291	EGP13379;EGP19307;EGP10289;EGP16278;EGP18709;EGP28222;EGP11464;EGP19302;EGP21890;EGP18281;EGP22444;EGP13603;EGP27814;EGP03397;EGP16279;EGP28526;EGP28539;EGP10223	18	EGP14208;EGP17805;EGP20657;EGP12517;EGP31804;EGP20291	6
Biological process	GO:0008154	actin polymerization or depolymerization	1/1312	0.968869	1	EGP17263	EGP17263	1	--	0
Biological process	GO:0015977	carbon fixation	1/1312	0.968869	1	EGP15957	--	0	EGP15957	1
Biological process	GO:0019395	fatty acid oxidation	1/1312	0.968869	1	EGP33690	EGP33690	1	--	0
Biological process	GO:0072503	cellular divalent inorganic cation homeostasis	1/1312	0.968869	1	EGP30372	--	0	EGP30372	1
Biological process	GO:0080092	regulation of pollen tube growth	1/1312	0.968869	1	EGP18133	EGP18133	1	--	0
Biological process	GO:0090501	RNA phosphodiester bond hydrolysis	1/1312	0.968869	1	EGP01578	EGP01578	1	--	0
Biological process	GO:0046467	membrane lipid biosynthetic process	3/1312	0.969048	3	EGP12462;EGP33663;EGP02482	EGP12462;EGP33663	2	EGP02482	1
Biological process	GO:0045333	cellular respiration	5/1312	0.969215	5	EGP10670;EGP31632;EGP16251;EGP16604;EGP31800	EGP10670;EGP31632;EGP16251;EGP16604;EGP31800	5	--	0
Biological process	GO:0043087	regulation of GTPase activity	2/1312	0.969783	2	EGP28230;EGP26639	EGP28230	1	EGP26639	1
Biological process	GO:0006511	ubiquitin-dependent protein catabolic process	24/1312	0.970237	24	EGP16692;EGP22035;EGP10536;EGP02497;EGP09622;EGP11773;EGP00309;EGP26858;EGP08904;EGP15937;EGP17335;EGP23937;EGP06612;EGP18673;EGP11089;EGP10181;EGP30458;EGP26508;EGP02518;EGP30256;EGP03250;novel.857;EGP10223;novel.1173	EGP16692;EGP22035;EGP10536;EGP09622;EGP11773;EGP26858;EGP15937;EGP06612;EGP18673;EGP11089;EGP10181;EGP30458;EGP26508;EGP02518;EGP30256;EGP03250;novel.857;EGP10223	18	EGP02497;EGP00309;EGP08904;EGP17335;EGP23937;novel.1173	6
Biological process	GO:0009644	response to high light intensity	1/1312	0.971	1	EGP09169	EGP09169	1	--	0
Biological process	GO:0048285	organelle fission	12/1312	0.971319	12	novel.2248;EGP13379;EGP31754;EGP05343;EGP28004;EGP13377;EGP30715;EGP33648;EGP02878;novel.775;EGP02877;EGP17260	novel.2248;EGP13379;EGP31754;EGP05343;EGP28004;EGP33648;EGP02878;novel.775;EGP02877;EGP17260	10	EGP13377;EGP30715	2
[truncated: 832 more rows]
