# Supplementary material for: Genome-Wide Analysis of R2R3-MYB Genes and Functional Characterization of SmMYB75 in Eggplant Fruit Implications for Crop Improvement and Nutritional Enhancement
Source: Int J Mol Sci. 2024 Jan 18;25(2):1163. doi: 10.3390/ijms25021163 (PMC10816229; doi:10.3390/ijms25021163)
Supplement: Supplementary file 1 [file ijms-25-01163-s001.zip › Table S8.xlsx]

## Sheet: Supplementary Table S8
Supplementary Table S8. Metabolite information for all samples.
Index	Compounds	Class I	Class II
ML10181668	Cycloleucine*	Amino acids and derivatives	Amino acids and derivatives
Zmdp001663	γ-glutamylmethionine	Amino acids and derivatives	Amino acids and derivatives
pme2617	L-Methionine Sulfoxide	Amino acids and derivatives	Amino acids and derivatives
Zmgn002106	N-Acetyl-L-phenylalanine	Amino acids and derivatives	Amino acids and derivatives
Lmhp001732	L-Prolyl-L-Phenylalanine	Amino acids and derivatives	Amino acids and derivatives
Zmdp002216	L-γ-Glutamyl-L-leucine	Amino acids and derivatives	Amino acids and derivatives
mws0629	L-Aspartyl-L-Phenylalanine	Amino acids and derivatives	Amino acids and derivatives
mws4516	Pyroglutamic acid	Amino acids and derivatives	Amino acids and derivatives
mws0282	L-Tryptophan	Amino acids and derivatives	Amino acids and derivatives
mws0875	L-Cysteinyl-L-glycine	Amino acids and derivatives	Amino acids and derivatives
mws4532g	D-Ornithine	Amino acids and derivatives	Amino acids and derivatives
pme3351	Allysine(6-Oxo DL-Norleucine)	Amino acids and derivatives	Amino acids and derivatives
MW0106075	2-amino-4-(S-butylsulfonimidoyl)butanoate	Amino acids and derivatives	Amino acids and derivatives
mws0001	L-Asparagine	Amino acids and derivatives	Amino acids and derivatives
Lmhp002001	L-Valyl-L-Phenylalanine	Amino acids and derivatives	Amino acids and derivatives
Zmdp001857	γ-Glutamyltyrosine	Amino acids and derivatives	Amino acids and derivatives
Zbfp001070	N-Caffeoylphenylalanine	Amino acids and derivatives	Amino acids and derivatives
pme0008	L-Citrulline	Amino acids and derivatives	Amino acids and derivatives
mws1050	O-Acetylserine	Amino acids and derivatives	Amino acids and derivatives
mws0193	L-Homocitrulline	Amino acids and derivatives	Amino acids and derivatives
pme0122	N6-Acetyl-L-lysine	Amino acids and derivatives	Amino acids and derivatives
pme0006	L-Proline*	Amino acids and derivatives	Amino acids and derivatives
Zmdp001647	γ-Glutamyl-L-valine	Amino acids and derivatives	Amino acids and derivatives
pme2914	3-Hydroxy-3-methylpentane-1,5-dioic acid	Amino acids and derivatives	Amino acids and derivatives
pme0170	N-Acetyl-L-Arginine	Amino acids and derivatives	Amino acids and derivatives
Zbqp000676	3-(triazan-2-yl)propyl L-prolinate	Amino acids and derivatives	Amino acids and derivatives
pmb0468	N-Formyl-L-Methionine	Amino acids and derivatives	Amino acids and derivatives
pmb0034	L-α-Glutamyl-L-Glutamic Acid	Amino acids and derivatives	Amino acids and derivatives
MWSprf117	5-Hydroxy-DL-tryptophan(5-HTP)	Amino acids and derivatives	Amino acids and derivatives
pme0137	N-Acetyl-L-Glutamine	Amino acids and derivatives	Amino acids and derivatives
pme0109	Methyldopa	Amino acids and derivatives	Amino acids and derivatives
Zbqn001288	(3-hydroxypropanoyl)-L-leucine	Amino acids and derivatives	Amino acids and derivatives
Wcdp000380	L-Valinol	Amino acids and derivatives	Amino acids and derivatives
MWStz261	Cyclo(D-Leu-L-Pro)	Amino acids and derivatives	Amino acids and derivatives
mws0712	N-Propionylglycine	Amino acids and derivatives	Amino acids and derivatives
mws0256	L-Valine*	Amino acids and derivatives	Amino acids and derivatives
ZbWp000749	ethyl-L-arginine*	Amino acids and derivatives	Amino acids and derivatives
mws0254	L-Histidine*	Amino acids and derivatives	Amino acids and derivatives
Zmmp002946	(3-(carboxyamino)-2-methylpropanoyl)phenylalanine*	Amino acids and derivatives	Amino acids and derivatives
mws0260	L-Arginine	Amino acids and derivatives	Amino acids and derivatives
Zbqn003921	N-carboxy-N-(2-oxo-2-phenylethyl)-L-alanine	Amino acids and derivatives	Amino acids and derivatives
Zbqp003125	Ile-Phe	Amino acids and derivatives	Amino acids and derivatives
Zbqp002414	h-gamma-Glu-leu-oh	Amino acids and derivatives	Amino acids and derivatives
Zmzp000145	Trimethyllysine	Amino acids and derivatives	Amino acids and derivatives
Lmrj002244	Cyclo(Pro-Pro)	Amino acids and derivatives	Amino acids and derivatives
pme0075	N-Acetyl-L-glutamic acid	Amino acids and derivatives	Amino acids and derivatives
NK10251888	NG,NG-Dimethyl-L-arginine*	Amino acids and derivatives	Amino acids and derivatives
pme3193	N-Acetyl-L-glycine	Amino acids and derivatives	Amino acids and derivatives
Zmmp001941	2-amino-4-hydroxy-3-((3,4,5-trihydroxytetrahydro-2H-pyran-2-yl)oxy)butanoic acid	Amino acids and derivatives	Amino acids and derivatives
MWS5164	N,N'-Dimethylarginine;SDMA*	Amino acids and derivatives	Amino acids and derivatives
pme0014	L-Glutamic acid	Amino acids and derivatives	Amino acids and derivatives
MWS04412	N(6),N(6)-Dimethyl-L-lysine	Amino acids and derivatives	Amino acids and derivatives
Zmzn000113	L-threo-3-Methylaspartate	Amino acids and derivatives	Amino acids and derivatives
Lmhp001430	Cyclo(Pro-Glu)	Amino acids and derivatives	Amino acids and derivatives
pmb2855	L-Glutamine-O-glycoside	Amino acids and derivatives	Amino acids and derivatives
MWS04559g	3-Hydroxy-L-phenylalanine*	Amino acids and derivatives	Amino acids and derivatives
MWS3166	N-Palmitoylglycine	Amino acids and derivatives	Amino acids and derivatives
Zbqp001029	riazan-2-yl)propyl L-prolinate*	Amino acids and derivatives	Amino acids and derivatives
MWS2413	N-acetyl-beta-alanine	Amino acids and derivatives	Amino acids and derivatives
pmb2857	L-Glutamic acid-O-glycoside	Amino acids and derivatives	Amino acids and derivatives
MWSmce607	DL-Threonine	Amino acids and derivatives	Amino acids and derivatives
mws5042	L-Glycyl-L-phenylalanine	Amino acids and derivatives	Amino acids and derivatives
Lmhp001670	L-Valyl-L-Leucine	Amino acids and derivatives	Amino acids and derivatives
pme3033	N,N-Dimethylglycine*	Amino acids and derivatives	Amino acids and derivatives
Lmbp000123	L-Homomethionine	Amino acids and derivatives	Amino acids and derivatives
MWS1771	L-Tyrosine methyl ester	Amino acids and derivatives	Amino acids and derivatives
MW0153885	Methionylvaline	Amino acids and derivatives	Amino acids and derivatives
Zmmp001429	Glycyl-L-leucine	Amino acids and derivatives	Amino acids and derivatives
Wccp002543	γ-Glutamylphenylalanine	Amino acids and derivatives	Amino acids and derivatives
Zbqn002253	6-(((S)-1-carboxyethyl)amino)-4-hydroxyhexanoicacid	Amino acids and derivatives	Amino acids and derivatives
mws4176	L-Alanyl-L-Phenylalanine	Amino acids and derivatives	Amino acids and derivatives
Zmdp000292	Arginine methyl ester*	Amino acids and derivatives	Amino acids and derivatives
pme0124	L-Glycyl-L-proline	Amino acids and derivatives	Amino acids and derivatives
Zmjp000182	N-Monomethyl-L-arginine*	Amino acids and derivatives	Amino acids and derivatives
Zmyn000155	N-α-Acetyl-L-ornithine	Amino acids and derivatives	Amino acids and derivatives
mws5035	L-Leucyl-L-phenylalanine	Amino acids and derivatives	Amino acids and derivatives
pme3388	Homoarginine	Amino acids and derivatives	Amino acids and derivatives
MWStz103	S-(5'-Adenosyl)-L-methionine	Amino acids and derivatives	Amino acids and derivatives
Lmhp002031	L-Leucyl-L-Leucine	Amino acids and derivatives	Amino acids and derivatives
MWS4309	Glycyl-tryptophan	Amino acids and derivatives	Amino acids and derivatives
Zmdp000972	S-Methyl-L-cysteine	Amino acids and derivatives	Amino acids and derivatives
Hmsp000364	L-Cyclopentylglycine	Amino acids and derivatives	Amino acids and derivatives
mws0219	L-Aspartic Acid	Amino acids and derivatives	Amino acids and derivatives
pme0193	L-Glutamine	Amino acids and derivatives	Amino acids and derivatives
mws0263	5-Oxo-L-Proline	Amino acids and derivatives	Amino acids and derivatives
mws0250	L-Tyrosine*	Amino acids and derivatives	Amino acids and derivatives
Lmrj001698	L-Seryl-L-Isoleucine	Amino acids and derivatives	Amino acids and derivatives
Lmbn000121	3-Cyano-L-alanine	Amino acids and derivatives	Amino acids and derivatives
Zbqp003309	Asp-Ile-Leu	Amino acids and derivatives	Amino acids and derivatives
MW0109888	Thr-Phe	Amino acids and derivatives	Amino acids and derivatives
Zbqn004681	N-acetyl-tryptophan	Amino acids and derivatives	Amino acids and derivatives
mws3141	5-Methoxy-DL-tryptophan	Amino acids and derivatives	Amino acids and derivatives
Lcsp002417	Ser-Val-Leu	Amino acids and derivatives	Amino acids and derivatives
mws0224	DL-Methionine	Amino acids and derivatives	Amino acids and derivatives
Lmrj002087	L-Isoleucyl-L-Aspartate	Amino acids and derivatives	Amino acids and derivatives
mws0582	S-(Methyl)glutathione	Amino acids and derivatives	Amino acids and derivatives
mws1051	S-Adenosylmethionine	Amino acids and derivatives	Amino acids and derivatives
Lmhp001461	L-Prolyl-L-Leucine	Amino acids and derivatives	Amino acids and derivatives
MWSmce585	Methyl 3-aminopropanoate	Amino acids and derivatives	Amino acids and derivatives
MWSslk140	N-Acetyl-L-Methionine	Amino acids and derivatives	Amino acids and derivatives
pme0026	L-Lysine	Amino acids and derivatives	Amino acids and derivatives
Zmmp000635	(2S)-2-amino-4-methyl-4-pentenoic acid*	Amino acids and derivatives	Amino acids and derivatives
Yalp000545	N-Methyl-L-proline*	Amino acids and derivatives	Amino acids and derivatives
pme3827	3,4-Dihydroxy-L-phenylalanine (L-Dopa)	Amino acids and derivatives	Amino acids and derivatives
pme1086	Glutathione reduced form	Amino acids and derivatives	Amino acids and derivatives
mws0221	L-Cystine	Amino acids and derivatives	Amino acids and derivatives
pme3382	N-Acetyl-L-threonine	Amino acids and derivatives	Amino acids and derivatives
MWS4471	N-Alpha-Acetyl-L-Asparagine	Amino acids and derivatives	Amino acids and derivatives
mws0671	L-Homoserine	Amino acids and derivatives	Amino acids and derivatives
Zbqp003444	(S)-4-amino-5-oxo-5-(pentylamino)pentanoic acid	Amino acids and derivatives	Amino acids and derivatives
mws5041	L-Glycyl-L-isoleucine*	Amino acids and derivatives	Amino acids and derivatives
mws0736	N-Glycyl-L-leucine*	Amino acids and derivatives	Amino acids and derivatives
Zazp002547	cyclo-(Gly-Phe)	Amino acids and derivatives	Amino acids and derivatives
Zbqp001937	2,6-diamino-7-methyl-5-oxooctanoic acid	Amino acids and derivatives	Amino acids and derivatives
Lmqp000427	N-Methyl-Trans-4-Hydroxy-L-Proline	Amino acids and derivatives	Amino acids and derivatives
pmb1283	L-Glutaminyl-L-valyl-L-valyl-L-cysteine	Amino acids and derivatives	Amino acids and derivatives
ZbWp000360	N-(1-deoxy-1-xylosyl)valine	Amino acids and derivatives	Amino acids and derivatives
Zmgn001039	S-Ribosyl-L-homocysteine	Amino acids and derivatives	Amino acids and derivatives
pmb0962	L-Lysine-Butanoic Acid	Amino acids and derivatives	Amino acids and derivatives
Zbqn003748	N-malonylleucine	Amino acids and derivatives	Amino acids and derivatives
pme0253	N-Acetyl-L-leucine	Amino acids and derivatives	Amino acids and derivatives
Zbqn004234	N-(malonyl)phenylalanine	Amino acids and derivatives	Amino acids and derivatives
mws5037	L-Alanyl-L-leucine	Amino acids and derivatives	Amino acids and derivatives
MWS0132	Oxiglutatione	Amino acids and derivatives	Amino acids and derivatives
pme1987	L-Alanine	Amino acids and derivatives	Amino acids and derivatives
pme2566	5-L-Glutamyl-L-amino acid	Amino acids and derivatives	Amino acids and derivatives
pmb0464	L-Aspartic acid-O-diglucoside	Amino acids and derivatives	Amino acids and derivatives
Zmmp001356	Lactosyl-L-Leucine	Amino acids and derivatives	Amino acids and derivatives
mws0227	L-Leucine*	Amino acids and derivatives	Amino acids and derivatives
mws0258	L-Isoleucine*	Amino acids and derivatives	Amino acids and derivatives
MWS04555g	D-Allo-Isoleucine*	Amino acids and derivatives	Amino acids and derivatives
pme2559	N-Acetyl-L-Aspartic Acid	Amino acids and derivatives	Amino acids and derivatives
Zmln000668	Monogalloyl-diglucose	Phenolic acids	Phenolic acids
MA10002917	2,4-Dinitrophenol	Phenolic acids	Phenolic acids
Lmgn001670	Salicylic acid	Phenolic acids	Phenolic acids
Cmzn004594	Dunalianoside C*	Phenolic acids	Phenolic acids
pme2828	4-Nitrophenol	Phenolic acids	Phenolic acids
Wmyn000217	2,6-dimethoxy-hydroquinone-4-O-β-D-glucopyranoside	Phenolic acids	Phenolic acids
MWS2069	2-Methoxy-4-methylphenol	Phenolic acids	Phenolic acids
mws1200	p-Coumaric acid methyl ester	Phenolic acids	Phenolic acids
mws0178	Chlorogenic acid (3-O-Caffeoylquinic acid)*	Phenolic acids	Phenolic acids
Wafn002081	Dihydroxybenzoyl xyloside	Phenolic acids	Phenolic acids
Lmmn001643	2-Hydroxycinnamic acid*	Phenolic acids	Phenolic acids
pme2598	3,4-Dihydroxybenzeneacetic acid*	Phenolic acids	Phenolic acids
Hmtn001120	5-(2-Hydroxyethyl)-2-O-glucosylphenol	Phenolic acids	Phenolic acids
Jmwn002057	2-(3-β-D-glucopyranosyloxy-4-hydroxyphenyl)ethanol-1-O-β-D-glucopyranoside	Phenolic acids	Phenolic acids
Hmhn003067	Phenylpropionic acid-O-β-D-glucopyranoside	Phenolic acids	Phenolic acids
Hmsn001911	Idesin	Phenolic acids	Phenolic acids
MWSmce248	3-Hydroxycinnamic Acid*	Phenolic acids	Phenolic acids
Lmbn002648	α-Hydroxycinnamic Acid*	Phenolic acids	Phenolic acids
mws0179	Chlorogenic acid methyl ester	Phenolic acids	Phenolic acids
Zmgn004894	Methyl 4-hydroxybenzoate*	Phenolic acids	Phenolic acids
MWS1848	Phenyl acetate*	Phenolic acids	Phenolic acids
ML10179289	2-Phenylethanol	Phenolic acids	Phenolic acids
mws0093	Coniferyl alcohol*	Phenolic acids	Phenolic acids
Zmzn002575	2-Nitrophenol	Phenolic acids	Phenolic acids
mws0906	Coniferin	Phenolic acids	Phenolic acids
pmn001681	1-(4-Methoxyphenyl)-1-propanol	Phenolic acids	Phenolic acids
MWSmce294	Elemicin	Phenolic acids	Phenolic acids
MWSmce675	Arbutin	Phenolic acids	Phenolic acids
Jmwp003339	2-Phenylethy-1-O-β-D-glucoside	Phenolic acids	Phenolic acids
Lmtn000940	1-O-(3,4-Dihydroxy-5-methoxy-benzoyl)-glucoside	Phenolic acids	Phenolic acids
pmb3074	5-O-p-Coumaroylquinic acid*	Phenolic acids	Phenolic acids
Zmhn001793	6-O-Caffeoyl-D-glucose*	Phenolic acids	Phenolic acids
Lmxp001668	2-Methoxy-4-ethenylphenol	Phenolic acids	Phenolic acids
Lmyn002788	Methyl gallate*	Phenolic acids	Phenolic acids
pme0309	3-O-Methylgallic Acid*	Phenolic acids	Phenolic acids
pmb0752	3-O-Feruloylquinic acid	Phenolic acids	Phenolic acids
pme0281	Terephthalic acid	Phenolic acids	Phenolic acids
MWSslk097	Dimethyl phthalate	Phenolic acids	Phenolic acids
pme3083	2-(Formylamino)benzoic acid	Phenolic acids	Phenolic acids
Lmmn001294	Koaburaside*	Phenolic acids	Phenolic acids
MWSslk110	Helecin	Phenolic acids	Phenolic acids
MWS2070	Propyl 4-hydroxybenzoate	Phenolic acids	Phenolic acids
Zmhn001358	4-O-Glucosyl-4-hydroxybenzoic acid*	Phenolic acids	Phenolic acids
Wafn002874	4-O-(4'-O-alpha-D-Glucopyranosyl)caffeoylquinic acid	Phenolic acids	Phenolic acids
Zmhn000892	4-O-Glucosyl-3,4-dihydroxybenzyl alcohol	Phenolic acids	Phenolic acids
Lmsn003318	1-O-Feruloyl-β-D-glucose*	Phenolic acids	Phenolic acids
Hmhn003518	4-O-β-D-glucopyranosylferulic acid*	Phenolic acids	Phenolic acids
pmn001690	3-Hydroxy-4-isopropylbenzylalcohol-3-O-glucoside	Phenolic acids	Phenolic acids
Zmcn005156	4,5-O-Dicaffeoylquinic Acid Methyl Ester	Phenolic acids	Phenolic acids
Lahn001701	4-(6-O-Sulfo-Beta-D-Glucopyranosyloxy)-3-Hydroxybenzoic Acid	Phenolic acids	Phenolic acids
Cmjn004337	Benzyl-(2''-O-xylosyl)glucoside	Phenolic acids	Phenolic acids
Hmln007772	Nordihydrocapsiate*	Phenolic acids	Phenolic acids
MWS2066	1-Naphthol*	Phenolic acids	Phenolic acids
HJN056	Sesquimarocanol B	Phenolic acids	Phenolic acids
Wmhp000040	Darendoside B	Phenolic acids	Phenolic acids
Hmln002597	Sodium ferulate	Phenolic acids	Phenolic acids
Lmnn002886	1'-O-(3,4-Dihydroxyphenethyl)-O-caffeoyl-glucoside	Phenolic acids	Phenolic acids
pmb2928	Gallic acid-4-O-glucoside	Phenolic acids	Phenolic acids
Wdtp003528	3,4,5-trihydroxy-6-[4-[[(2R)-5-oxooxolan-2-yl]methyl]phenoxy]oxane-2-carboxylic acid	Phenolic acids	Phenolic acids
Zbfn002690	1-(4-Hydroxybenzoyl)Glucose; 25545-07-7	Phenolic acids	Phenolic acids
mws4085	Sinapic acid	Phenolic acids	Phenolic acids
Wcdn001606	Leonuriside A*	Phenolic acids	Phenolic acids
MWS1875	2-Naphthol*	Phenolic acids	Phenolic acids
Lmtp004382	Sinapinaldehyde	Phenolic acids	Phenolic acids
pmb3066	5-O-p-Coumaroylshikimic acid O-glucoside	Phenolic acids	Phenolic acids
Wasn002933	1-O-(3,4,5-Trimethoxybenzoyl)-B-D-Glucopyranoside	Phenolic acids	Phenolic acids
Lmtn002233	Androsin	Phenolic acids	Phenolic acids
Lmyn004515	3,4-Dimethoxycinnamic acid	Phenolic acids	Phenolic acids
Lmgp002593	3-hydroxybenzaldehyde	Phenolic acids	Phenolic acids
pma6460	4-O-p-Coumaroylquinic acid	Phenolic acids	Phenolic acids
MWSHC20125	5-O-Caffeoylshikimic acid	Phenolic acids	Phenolic acids
pmn001669	Methyl sinapate	Phenolic acids	Phenolic acids
mws2108	Cryptochlorogenic acid (4-O-Caffeoylquinic acid)*	Phenolic acids	Phenolic acids
pmn001420	1-O-Caffeoyl-β-D-glucose*	Phenolic acids	Phenolic acids
mws1212	Ferulic acid methyl ester	Phenolic acids	Phenolic acids
Zmyn014236	2-Dodecoxyethyl Hydrogen Sulfate	Phenolic acids	Phenolic acids
mws0024	Gallic acid	Phenolic acids	Phenolic acids
Lmsn002288	1-O-Caffeoyl-(6-O-glucosyl)-β-D-glucose	Phenolic acids	Phenolic acids
Lmzn001582	5'-Glucosyloxyjasmanic acid*	Phenolic acids	Phenolic acids
Cmzn005251	6-O-Caffeoylarbutin	Phenolic acids	Phenolic acids
Lmbn013410	2,4-Di-Tert-Butylphenol*	Phenolic acids	Phenolic acids
Lmln010063	2,6-Di-tert-butylphenol*	Phenolic acids	Phenolic acids
Hmmn002544	Ferulic acid-4-O-glucoside	Phenolic acids	Phenolic acids
pmb3142	Salicylic acid-2-O-glucoside*	Phenolic acids	Phenolic acids
MWSmce632	Vanillin acetate	Phenolic acids	Phenolic acids
mws0885	2,4-Dihydroxybenzoic acid	Phenolic acids	Phenolic acids
Zmhn002334	6-O-Feruloyl-β-D-glucose	Phenolic acids	Phenolic acids
Ymjm000116	6-O-Acetylarbutin	Phenolic acids	Phenolic acids
Lmyn000160	Mucic acid Dimethyl Ester	Phenolic acids	Phenolic acids
MWS1743	alpha-hexylcinnamaldehyde	Phenolic acids	Phenolic acids
Hmbp001276	Gallacetophenone	Phenolic acids	Phenolic acids
MWSHC2062	Ferulic β-glucoside*	Phenolic acids	Phenolic acids
pmn001560	Cimicifugic acid A	Phenolic acids	Phenolic acids
mws0346	3-(3-Hydroxyphenyl)-propionic acid	Phenolic acids	Phenolic acids
Lmsn000363	Raspberryketone glucoside	Phenolic acids	Phenolic acids
Lmrn003000	2-Hydroxy-3-phenylpropanoic acid	Phenolic acids	Phenolic acids
Zmln000899	Syringaldehyde-4-O-glucoside	Phenolic acids	Phenolic acids
Lmsn003111	1-O-p-Coumaroyl-β-D-glucose*	Phenolic acids	Phenolic acids
Lmfn003035	6-O-p-Coumaroyl-β-D-glucose*	Phenolic acids	Phenolic acids
pme1292	Homogentisic acid*	Phenolic acids	Phenolic acids
Zbjn003605	1,4-O-di-Caffeoyl-3-O-glucoside Quinic Acid*	Phenolic acids	Phenolic acids
HJN102	3,4,5-Tricaffeoylquinic acid	Phenolic acids	Phenolic acids
Wasn006251	Shomaside F*	Phenolic acids	Phenolic acids
NK10253223	2-Amino-3-methoxybenzoic acid	Phenolic acids	Phenolic acids
Lmsn003778	1-O-Caffeoyl-4-O-galloyl-β-D-glucose	Phenolic acids	Phenolic acids
Li512115	Isochlorogenic acid B	Phenolic acids	Phenolic acids
Yshj000011	2,6-dimethoxy-4-hydroxyphenyl-1-O-beta-D-glucopyranoside	Phenolic acids	Phenolic acids
mws0467	3-(4-Hydroxyphenyl)-propionic acid*	Phenolic acids	Phenolic acids
Lmhn003240	Benzoylmalic acid	Phenolic acids	Phenolic acids
Zbln003341	2-(2-(3,4-dihydroxyphenyl)-2-methoxyethoxy)-6-(hydroxymethyl)tetrahydro-2H-pyran-3,4,5-tri	Phenolic acids	Phenolic acids
Waxn004217	1,5-O-dicaffeoyl-3-O-glucoside-quinic acid*	Phenolic acids	Phenolic acids
pmn001382	Isochlorogenic acid A	Phenolic acids	Phenolic acids
Zmhn001883	Vanillic acid-4-O-glucoside	Phenolic acids	Phenolic acids
HJN037	3,5-Dihydroxy-4-methoxybenzoic acid; 4-O-Methylgallic Acid	Phenolic acids	Phenolic acids
Lmsn002247	1-O-Salicyloyl-β-D-glucose*	Phenolic acids	Phenolic acids
pmb3064	3-O-p-Coumaroylquinic acid-O-glucoside	Phenolic acids	Phenolic acids
Xmyn004302	Ginkgoside A	Phenolic acids	Phenolic acids
Wasn005592	2-Galloyl-6-O-Benzoyl Glucose*	Phenolic acids	Phenolic acids
mws0459	Eugenol	Phenolic acids	Phenolic acids
Hmpp004047	Demethoxycurcumin	Phenolic acids	Phenolic acids
Hmtn001302	Glucosyloxybenzoic acid*	Phenolic acids	Phenolic acids
MWS1776	m-Cresol	Phenolic acids	Phenolic acids
Hmln000659	3-O-Galloyl-D-glucose*	Phenolic acids	Phenolic acids
Lmsn001014	1-O-Galloyl-β-D-glucose*	Phenolic acids	Phenolic acids
Lmfn000604	6-O-Galloyl-β-D-glucose*	Phenolic acids	Phenolic acids
Lmtn002109	Pleoside	Phenolic acids	Phenolic acids
Lmrgn03360	Cryptamygin B	Phenolic acids	Phenolic acids
Zmhn002301	p-Coumaric acid-4-O-glucoside	Phenolic acids	Phenolic acids
pmn001710	Rosmarinic acid-3'-O-glucoside	Phenolic acids	Phenolic acids
mws2368	Tyrosol; 4-Hydroxyphenylethanol	Phenolic acids	Phenolic acids
Lmrn001951	(S)-2-Hydroxy-3-(4-Hydroxyphenyl)Propanoic Acid*	Phenolic acids	Phenolic acids
Wdtp004079	3,4,5-Trihydroxy-6-[4-(4-methyl-3-oxopentyl)phenoxy]oxane-2-carboxylic acid	Phenolic acids	Phenolic acids
Yajn004789	(2R,3S,4S,5R,6S)-2-((((2S,3R,4S)-3,4-dihydroxy-4-(hydroxymethyl)tetrahydrofuran-2-yl)oxy)methyl)-6-(4-vinylphenoxy)tetrahydro-2H-pyran-3,4,5-triol	Phenolic acids	Phenolic acids
Hmyn001360	Doitungbiphenyl A	Phenolic acids	Phenolic acids
Zmhn001703	5-O-Galloyl-D-hamamelose*	Phenolic acids	Phenolic acids
Lmsn004322	1,6-Di-O-caffeoyl-β-D-glucose	Phenolic acids	Phenolic acids
Lmqp002627	Vanillic acid methyl ester	Phenolic acids	Phenolic acids
MWS3046	3-(3-Hydroxyphenyl)-3-hydroxypropanoic acid	Phenolic acids	Phenolic acids
Zaln004082	3-O-caffeoylshikimic acid*	Phenolic acids	Phenolic acids
Zaln004057	4-caffeoylshikimic acid*	Phenolic acids	Phenolic acids
mws0749	4-Hydroxybenzoic acid	Phenolic acids	Phenolic acids
Zmhn000593	Magnoloside B	Phenolic acids	Phenolic acids
Lmcn002982	Methyl 3-O-Methyl Gallate	Phenolic acids	Phenolic acids
Labn003679	(E)-caffeyl alcohol 4-O-β-D-glucopyranoside	Phenolic acids	Phenolic acids
Hmtn001288	Methyl 2,4-dihydroxyphenylacetate*	Phenolic acids	Phenolic acids
Hmsn002272	Demethyl coniferin	Phenolic acids	Phenolic acids
Hmln000873	2-O-Galloyl-D-glucose	Phenolic acids	Phenolic acids
Wafn002827	Dihydroferulic acid glucoside	Phenolic acids	Phenolic acids
WaYn005746	(E)-3-[(2S,3S)-2-(4-hydroxy-3-methoxyphenyl)-7-methoxy-3-methyl-2,3-dihydro-1-benzofuran-5-yl]prop-2-enal*	Phenolic acids	Phenolic acids
Lmqp002761	Alnusonol	Phenolic acids	Phenolic acids
mws0014	Ferulic acid	Phenolic acids	Phenolic acids
pmb2936	Disinapoyl glucoside	Phenolic acids	Phenolic acids
Lmbp000728	(S)-2-Phenyloxirane	Phenolic acids	Phenolic acids
pmb2654	Anthranilate-1-O-Sophoroside	Phenolic acids	Phenolic acids
pmn001459	Sibiricose A6	Phenolic acids	Phenolic acids
MWSprf004	Neochlorogenic acid (5-O-Caffeoylquinic acid)*	Phenolic acids	Phenolic acids
Hmqp002567	4-Hydroxycinnamic acid p-hydroxyphenethylamine*	Phenolic acids	Phenolic acids
Zbfn005376	2-Caffeoyl-6-(4-hydroxycinnamoyl)glucoside	Phenolic acids	Phenolic acids
Wmzn002116	3,5-Dicaffeoylquinic acid	Phenolic acids	Phenolic acids
Lakn003294	2-β-D-Glucopyranosyloxy-5-hydroxyphenylacetic acidmethylester	Phenolic acids	Phenolic acids
WaYn002313	Homosyringic Acid 4'-O-Glucoside	Phenolic acids	Phenolic acids
Wcdp009119	Elaidolinolenic acid	Phenolic acids	Phenolic acids
Hmln003529	Benzyl β-primeveroside	Phenolic acids	Phenolic acids
Zmhn002227	4-O-Glucosyl-sinapate	Phenolic acids	Phenolic acids
mws1358	Pyrocatechol	Phenolic acids	Phenolic acids
MWSslk092	Usnic acid	Phenolic acids	Phenolic acids
Ymjm000148	Salidroside	Phenolic acids	Phenolic acids
Zmhn002750	4-O-(6'-O-Glucosylcaffeoyl)-4-hydroxybenzoic acid	Phenolic acids	Phenolic acids
Wasn005803	Protocatechuic acid 4-O-(6''-O-Feruloyl)Glucoside	Phenolic acids	Phenolic acids
Lmyp003371	3,5-Dihydroxytoluene	Phenolic acids	Phenolic acids
pmb0108	Feruloyl syringic acid	Phenolic acids	Phenolic acids
pmb3317	Quinacyl syringic acid	Phenolic acids	Phenolic acids
Lmhn006533	Awsoniaside B	Phenolic acids	Phenolic acids
Lmnn102707	Cimidahurinine*	Phenolic acids	Phenolic acids
Lmgp003989	Dicaffeoylshikimic acid	Phenolic acids	Phenolic acids
Lmhn002574	Caffeoyl(p-Hydroxybenzoyl)tartaric acid	Phenolic acids	Phenolic acids
MWSmce328	Isochlorogenic acid C*	Phenolic acids	Phenolic acids
Wasn005799	3-Galloyl-6-O-Benzoyl Glucose*	Phenolic acids	Phenolic acids
pme0282	Phthalic acid	Phenolic acids	Phenolic acids
mws0028	Vanillic acid	Phenolic acids	Phenolic acids
pme3381	3-Hydroxyphenylacetic Acid Methyl Ester	Phenolic acids	Phenolic acids
MWS5206	4-Hydroxyphenyllactic Acid*	Phenolic acids	Phenolic acids
Lmbn001930	2-Hydroxybenzaldehyde (Salicylaldehyde)	Phenolic acids	Phenolic acids
Labn006314	5-[6-(benzoyloxymethyl)-3,4,5-trihydroxyoxan-2-yl]oxy-2-hydroxybenzoic acid*	Phenolic acids	Phenolic acids
Jmwn002172	3,4-dihydroxyphenylethanol-β-D-glucopyranoside*	Phenolic acids	Phenolic acids
Zmhn003076	((2R,3R,5R,6R)-6-(((E)-3-(3,4-dihydroxyphenyl)acryloyl)oxy)-3,4,5-trihydroxytetrahydro-2H-pyran-2-yl)methyl (Z)-3-(3,4-dihydroxyphenyl)acrylate	Phenolic acids	Phenolic acids
Lmzn001983	D-Threo-guaiacylglycerol-7-O-β-D-glucoside	Phenolic acids	Phenolic acids
pmb1587	4-Hydroxy-3,5-diisopropylbenzaldehyde	Phenolic acids	Phenolic acids
Lmxp011770	Diisobutyl phthalate*	Phenolic acids	Phenolic acids
Lman002731	Grevilloside F	Phenolic acids	Phenolic acids
pmb3072	3-O-p-Coumaroylshikimic acid-O-glucoside	Phenolic acids	Phenolic acids
pmb2833	3-O-Feruloylquinic acid-O-glucoside	Phenolic acids	Phenolic acids
MWSHC20170	Phenylmethyl β-L-glucopyranoside	Phenolic acids	Phenolic acids
Cmzn005970	Dunalianoside A*	Phenolic acids	Phenolic acids
pmb2497	4-Hydroxy-3-methoxymandelate	Phenolic acids	Phenolic acids
Wdtp003420	3,4,5-Trihydroxy-6-[[3-(4-methoxyphenyl)oxiran-2-yl]methoxy]oxane-2-carboxylic acid	Phenolic acids	Phenolic acids
pmn001671	Furanofructosyl-α-D-(6-mustard acyl)glucoside*	Phenolic acids	Phenolic acids
pmp001285	Phthalic anhydride	Phenolic acids	Phenolic acids
mws0145	O-Anisic acid (2-Methoxybenzoic acid)	Phenolic acids	Phenolic acids
mws0748	1-Caffeoylquinic acid	Phenolic acids	Phenolic acids
pmn001511	3-Hydroxy-5-Methylphenol-1-O-Glucoside	Phenolic acids	Phenolic acids
MWSmce712	Ethyl phenylacetate	Phenolic acids	Phenolic acids
pma3724	1-O-Feruloylquinic acid*	Phenolic acids	Phenolic acids
pmn001672	Furanofructosyl-α-D-(3-mustard acyl)glucoside*	Phenolic acids	Phenolic acids
Lmbn004847	4-Methoxyphenylpropionic acid*	Phenolic acids	Phenolic acids
Hmqn000843	Tachioside	Phenolic acids	Phenolic acids
Zmhn002032	4-O-(6'-O-Glucosylcaffeoylglucosyl)-4-hydroxybenzyl alcohol	Phenolic acids	Phenolic acids
Zmhn002508	4-p-Cumaroyl-rhamnosyl-(1→6)-D-glucose	Phenolic acids	Phenolic acids
Smfn005110	clinopodic acid C	Phenolic acids	Phenolic acids
Lmsn003628	6'-O-Sinapoylsucrose*	Phenolic acids	Phenolic acids
Lmfn001337	1,2,3-Tri-O-galloyl-β-D-glucose	Phenolic acids	Phenolic acids
Cmbp005523	1,3-O-Dicaffeoylglycerol	Phenolic acids	Phenolic acids
MWS1839	Ethylparaben	Phenolic acids	Phenolic acids
MWS4303	4-hydroxystyrene	Phenolic acids	Phenolic acids
mws1708	Gastrodin	Phenolic acids	Phenolic acids
pmb2819	O-Caffeoyl maltotriose	Phenolic acids	Phenolic acids
MWSmce346	1,3-O-Dicaffeoylquinic Acid (Cynarin)*	Phenolic acids	Phenolic acids
Lmdn004051	Thymoquinol-5-O-β-D-glucoside	Phenolic acids	Phenolic acids
mws0117	Homovanillic acid; 4-Hydroxy-3-methoxyphenylacetic acid	Phenolic acids	Phenolic acids
mws0853	Sinapyl alcohol	Phenolic acids	Phenolic acids
MWSHC2022	Glucosyringic acid	Phenolic acids	Phenolic acids
Wadn003423	Salvianic acid C	Phenolic acids	Phenolic acids
Lmhn003074	Feruloylmalic acid	Phenolic acids	Phenolic acids
Lmjp003731	3,4-O-Dicaffeoylquinic Acid Methyl Ester*	Phenolic acids	Phenolic acids
Lmjp003822	3,5-O-Dicaffeoylquinic Acid Methyl Ester*	Phenolic acids	Phenolic acids
Lmbn004790	Methyl 3-(3-hydroxy-4-methoxyphenyl)propanoate	Phenolic acids	Phenolic acids
Lmqn000780	Uridine 5'-diphospho-N-acetylglucosamine	Nucleotides and derivatives	Nucleotides and derivatives
MWS5173	Isocytosine	Nucleotides and derivatives	Nucleotides and derivatives
pme0183	Isoguanine	Nucleotides and derivatives	Nucleotides and derivatives
pme0257	Uracil	Nucleotides and derivatives	Nucleotides and derivatives
mws0668	Xanthosine	Nucleotides and derivatives	Nucleotides and derivatives
pme1474	5'-Deoxy-5'-(methylthio)adenosine	Nucleotides and derivatives	Nucleotides and derivatives
mws0847	1-Methyladenine	Nucleotides and derivatives	Nucleotides and derivatives
pme2801	7-Methylxanthine	Nucleotides and derivatives	Nucleotides and derivatives
pmb0964	Isopentenyladenine-7-N-glucoside	Nucleotides and derivatives	Nucleotides and derivatives
ML10180524	Cytarabine	Nucleotides and derivatives	Nucleotides and derivatives
pmb2507	2-Deoxyribose-1-phosphate	Nucleotides and derivatives	Nucleotides and derivatives
MWSslk102	6-Chloropurine	Nucleotides and derivatives	Nucleotides and derivatives
MWSmce326	AICAR phosphate (Acadesine phosphate)	Nucleotides and derivatives	Nucleotides and derivatives
pme3961	2'-Deoxyadenosine*	Nucleotides and derivatives	Nucleotides and derivatives
Lmcp002302	N6-(2-Hydroxyethyl)adenosine*	Nucleotides and derivatives	Nucleotides and derivatives
pme3967	2-(Dimethylamino)guanosine*	Nucleotides and derivatives	Nucleotides and derivatives
pmc0281	Ribosyladenosine	Nucleotides and derivatives	Nucleotides and derivatives
pme3337	Succinyladenosine	Nucleotides and derivatives	Nucleotides and derivatives
Lmqp000329	5-Aminoimidazole ribonucleotide	Nucleotides and derivatives	Nucleotides and derivatives
pme1109	Guanine	Nucleotides and derivatives	Nucleotides and derivatives
Wcjp001256	9-Alpha-Ribofuranosyladenine*	Nucleotides and derivatives	Nucleotides and derivatives
pme0230	Adenosine*	Nucleotides and derivatives	Nucleotides and derivatives
pme1266	3-Methylxanthine	Nucleotides and derivatives	Nucleotides and derivatives
mws0884	Cyclic 3',5'-Adenylic acid	Nucleotides and derivatives	Nucleotides and derivatives
pmb0197	N7-Methylguanosine	Nucleotides and derivatives	Nucleotides and derivatives
MWSmce295	1-beta-D-Arabinofuranosyluracil	Nucleotides and derivatives	Nucleotides and derivatives
pme3184	2'-Deoxyadenosine-5'-monophosphate	Nucleotides and derivatives	Nucleotides and derivatives
Zmjp000966	Vidarabine*	Nucleotides and derivatives	Nucleotides and derivatives
mws1715	Cordycepin (3'-Deoxyadenosine)*	Nucleotides and derivatives	Nucleotides and derivatives
mws0255	Cytosine	Nucleotides and derivatives	Nucleotides and derivatives
pmb2922	Uridine 5'-diphospho-D-glucose	Nucleotides and derivatives	Nucleotides and derivatives
MWSmce116	5'-Deoxyadenosine*	Nucleotides and derivatives	Nucleotides and derivatives
Zmjn001030	Adenosine 2'-Phosphate	Nucleotides and derivatives	Nucleotides and derivatives
pmb0998	Guanosine 5'-monophosphate	Nucleotides and derivatives	Nucleotides and derivatives
MWS5083	Flavin Single Nucleotide(FMN)	Nucleotides and derivatives	Nucleotides and derivatives
pmb0981	Adenosine 5'-monophosphate	Nucleotides and derivatives	Nucleotides and derivatives
pme2651	NADP (Nicotinamide adenine dinucleotide phosphate)	Nucleotides and derivatives	Nucleotides and derivatives
pme0256	Xanthine	Nucleotides and derivatives	Nucleotides and derivatives
Zmfn000481	Uridine-5'-Diphosphate-D-Xylose	Nucleotides and derivatives	Nucleotides and derivatives
MWS2027	Barbituric acid;Malonylurea;2,4,6-Pyrimidinetrione	Nucleotides and derivatives	Nucleotides and derivatives
Wayp001024	N-(1-Deoxy-1-fructosyl)Valine	Nucleotides and derivatives	Nucleotides and derivatives
mws0248	Uridine	Nucleotides and derivatives	Nucleotides and derivatives
mws0976	β-Pseudouridine	Nucleotides and derivatives	Nucleotides and derivatives
MWS4525	6-O-methylguanine	Nucleotides and derivatives	Nucleotides and derivatives
pme1119	Inosine	Nucleotides and derivatives	Nucleotides and derivatives
pme3732	Cytidine	Nucleotides and derivatives	Nucleotides and derivatives
Zmyp000878	Crotonoside; 2-Hydroxyadenosine	Nucleotides and derivatives	Nucleotides and derivatives
MWStz100	Decitabine; 5-Aza-2'-Deoxycytidine	Nucleotides and derivatives	Nucleotides and derivatives
pme3968	7-Methylguanine	Nucleotides and derivatives	Nucleotides and derivatives
Zmmp002106	4-methyl-1,5,2,3-dioxadiazinan-2-amine	Nucleotides and derivatives	Nucleotides and derivatives
pme3188	Uridine 5'-monophosphate	Nucleotides and derivatives	Nucleotides and derivatives
pme1194	2'-Deoxycytidine	Nucleotides and derivatives	Nucleotides and derivatives
Cmdn000784	Uric acid	Nucleotides and derivatives	Nucleotides and derivatives
MWS2984	8-Azaguanine	Nucleotides and derivatives	Nucleotides and derivatives
pme0033	Hypoxanthine	Nucleotides and derivatives	Nucleotides and derivatives
pmc0066	2'-Deoxyinosine-5'-monophosphate	Nucleotides and derivatives	Nucleotides and derivatives
pmb0532	Inosine 5'-monophosphate	Nucleotides and derivatives	Nucleotides and derivatives
MWSHC2054	Adenine	Nucleotides and derivatives	Nucleotides and derivatives
pme3007	Uridine 5'-diphosphate	Nucleotides and derivatives	Nucleotides and derivatives
MWSmce613	Citicoline	Nucleotides and derivatives	Nucleotides and derivatives
pme2117	Adenosine 5'-diphosphate	Nucleotides and derivatives	Nucleotides and derivatives
MWS4354	N6-methyladenosine	Nucleotides and derivatives	Nucleotides and derivatives
MWSmce668	ATP; Adenosine 5'-Triphosphate	Nucleotides and derivatives	Nucleotides and derivatives
pmb0530	Nicotinic acid adenine dinucleotide	Nucleotides and derivatives	Nucleotides and derivatives
pmb0374	2-Aminopurine	Nucleotides and derivatives	Nucleotides and derivatives
pme1173	Allopurinol	Nucleotides and derivatives	Nucleotides and derivatives
mws1409	Uridine-5'-diphosphoglucuronic acid	Nucleotides and derivatives	Nucleotides and derivatives
mws0675	β-Nicotinamide mononucleotide	Nucleotides and derivatives	Nucleotides and derivatives
Wayn001257	N-(1-Deoxy-1-fructosyl)Leucine	Nucleotides and derivatives	Nucleotides and derivatives
pme0166	1-Methylxanthine	Nucleotides and derivatives	Nucleotides and derivatives
mws0572	5-Methylcytosine	Nucleotides and derivatives	Nucleotides and derivatives
pmp000804	Isobavachalcone D	Flavonoids	Chalcones
Zbpn005555	Phloretin-4'-O-glucoside (Trilobatin)*	Flavonoids	Chalcones
HJN055	Dihydrocharcone-4'-O-glucoside*	Flavonoids	Chalcones
Wcfp003437	3-Prenyl-4,2',4'-Trihydroxychalcone	Flavonoids	Chalcones
pmn001716	Carthamone*	Flavonoids	Chalcones
Lmlp006175	Isosalipurposide (Phlorizin Chalcone)	Flavonoids	Chalcones
mws2118	Phloretin-2'-O-glucoside (Phlorizin)	Flavonoids	Chalcones
pme2960	Naringenin chalcone; 2',4,4',6'-Tetrahydroxychalcone*	Flavonoids	Chalcones
Zmgp004436	Okanin-4'-(6''-O-acetyl)glucoside*	Flavonoids	Chalcones
HJN087	Naringenin-4'-O-glucoside*	Flavonoids	Flavanones
Jmgn004021	6-C-Glucosyl-2-Hydroxynaringenin	Flavonoids	Flavanones
Zbbn005905	(2S)-Abyssinone II*	Flavonoids	Flavanones
MWSslk163	Isobavachin	Flavonoids	Flavanones
MWSHY0017	Naringenin (5,7,4'-Trihydroxyflavanone)*	Flavonoids	Flavanones
MWSslk081	Bavachin	Flavonoids	Flavanones
HJN090	Butin-7-O-glucoside*	Flavonoids	Flavanones
pme1598	Hesperetin-5-O-glucoside	Flavonoids	Flavanones
mws0036	Hesperetin-7-O-rutinoside (Hesperidin)	Flavonoids	Flavanones
mws0914	3,5,7-Trihydroxyflavanone (Pinobanksin)	Flavonoids	Flavanonols
HJN104	Dihydromyricetin-3-O-glucoside	Flavonoids	Flavanonols
Lmtn002796	Aromadendrin-7-O-glucoside*	Flavonoids	Flavanonols
Zmhp003514	6,7,8-Tetrahydroxy-5-methoxyflavone*	Flavonoids	Flavones
Cwjp002289	Luteolin-7-O-(2''''-O-rhamnosyl)sophorotrioside	Flavonoids	Flavones
mws0043	Nobiletin (5,6,7,8,3',4'-Hexamethoxyflavone)	Flavonoids	Flavones
Smbp004322	Scutevulin*	Flavonoids	Flavones
Lmtn002997	Mearnsetin-3-O-glucoside	Flavonoids	Flavones
Xmyn008071	Gnetifolin B*	Flavonoids	Flavones
Zmsp007375	3,5,7,3'4'-Pentamethoxyflavone	Flavonoids	Flavones
Hajp008206	3',4',5',5,7-Pentamethoxyflavone*	Flavonoids	Flavones
Wagp004984	Limocitrol 3-Glucoside	Flavonoids	Flavones
MWSHY0009	Diosmetin (5,7,3'-Trihydroxy-4'-methoxyflavone)*	Flavonoids	Flavones
Lmbn006032	Hypolaetin	Flavonoids	Flavones
MWS20147	Luteolin-3'-O-glucoside	Flavonoids	Flavones
Zmjp004852	5,6,3',4'-Tetrahydroxy-3,7-dimethoxyflavone-6-O-glucoside*	Flavonoids	Flavones
Hajp008550	5,6,7,3',4',5'-hexamethoxyflavone	Flavonoids	Flavones
Hmmn003584	Luteolin-7-O-rutinoside-5-O-rhamnoside	Flavonoids	Flavones
mws0055	Tangeretin (4',5,6,7,8-Pentamethoxyflavone)	Flavonoids	Flavones
MWSslk146	4'-O-Glucosylvitexin	Flavonoids	Flavones
Lmtp003948	3',5',5,7-Tetrahydroxy-4'-methoxyflavanone-3'-O-glucoside	Flavonoids	Flavones
MWSHY0104	Luteolin-7-O-glucoside (Cynaroside)*	Flavonoids	Flavones
Hmmp002169	Luteolin-5,7-di-O-rutinoside*	Flavonoids	Flavones
pmp000587	Luteolin-7-O-(6''-malonyl)glucoside*	Flavonoids	Flavones
Lmyn006227	Galangin (3,5,7-Trihydroxyflavone)	Flavonoids	Flavones
Lmyp005841	Chrysin-7-O-glucoside	Flavonoids	Flavones
MWSHC2053	5-Demethoxynobiletin; 3',4',6,7,8-Pentamethoxyflavone*	Flavonoids	Flavones
mws1313	Sinensetin (5,6,7,3',4'-pentamethoxyflavone)*	Flavonoids	Flavones
Zmhn003257	5,7,2'-Trihydroxy-8-methoxyflavone*	Flavonoids	Flavones
Hmmp002073	Apigenin-7-O-rutinoside-4'-O-Sophoroside*	Flavonoids	Flavones
Wagp009533	5-Hydroxy-6,7,3',4',5'-Pentamethoxyflavone	Flavonoids	Flavones
mws0072	Apigenin-5-O-glucoside	Flavonoids	Flavones
Lmnp002616	Cirsiliol-8-C-(2''-glucosyl)glucoside	Flavonoids	Flavones
Zmhp005139	Tamarixetin-3-O-(6''-malonyl)glucoside*	Flavonoids	Flavonols
Lmfp003403	Quercetagetin-7-O-glucoside(Quercetagitrin)*	Flavonoids	Flavonols
Lmdp004892	Kaempferol-3-O-(6''-malonyl)galactoside*	Flavonoids	Flavonols
HJAP127	Quercetin-3-O-(2''-O-Rhamnosyl)rutinoside	Flavonoids	Flavonols
Lmmn003398	Kaempferol-3-O-(6''-O-acetyl)glucoside	Flavonoids	Flavonols
Lmjp004941	3,5,4'-Trihydroxy-7-methoxyflavone (Rhamnocitrin)*	Flavonoids	Flavonols
mws0856	Quercetin-4'-O-glucoside (Spiraeoside)	Flavonoids	Flavonols
pmn001583	Quercetin-3-O-robinobioside	Flavonoids	Flavonols
Lmdp002969	Myricetin-3-O-galactoside*	Flavonoids	Flavonols
mws0059	Quercetin-3-O-rutinoside (Rutin)	Flavonoids	Flavonols
Lmhp002374	Quercetin-3-O-glucosyl(1→4)rhamnoside-7-O-rutinoside	Flavonoids	Flavonols
MWSHY0162	Quercetin-3-O-sophoroside (Baimaside)	Flavonoids	Flavonols
Zbsp004862	Syringetin-3-O-glucoside*	Flavonoids	Flavonols
pmp000596	Quercetin-3-O-(2''-O-galactosyl)glucoside	Flavonoids	Flavonols
Hmcp002399	Limocitrin-3-O-glucoside*	Flavonoids	Flavonols
mws0913	Kaempferol-3-O-galactoside (Trifolin)*	Flavonoids	Flavonols
Lmmp001947	Gossypetin-3-O-glucoside*	Flavonoids	Flavonols
Hmcp001919	Isorhamnetin-3-O-(6''-acetylglucosyl)(1→3)-glucoside	Flavonoids	Flavonols
Lmdp003286	Isohyperoside	Flavonoids	Flavonols
Lmpp003465	Myricetin-3-O-β-D-glucoside	Flavonoids	Flavonols
Xmyp005654	Kaempferol-4'-O-glucoside*	Flavonoids	Flavonols
HJAP005	Laricitrin-3-O-glucoside	Flavonoids	Flavonols
Zmhp004034	Rhodiolgin	Flavonoids	Flavonols
Lmsn002815	Kaempferol-3-O-rutinoside(Nicotiflorin)	Flavonoids	Flavonols
Lahp004593	Flavoyadorinin A	Flavonoids	Flavonols
Lmwp003442	Amoenin	Flavonoids	Flavonols
mws0032	Myricetin	Flavonoids	Flavonols
Lmmp003271	Gossypetin-8-O-glucoside	Flavonoids	Flavonols
Zbsp004301	Quercetin-7-O-rutinoside	Flavonoids	Flavonols
Lmbp002592	Kaempferol-3,7-O-diglucoside	Flavonoids	Flavonols
Lmcp003402	Tamarixetin-3-O-glucoside (Tamarixin)	Flavonoids	Flavonols
pmp000117	3,5,6,7,8,3',4'-Heptamethoxyflavone	Flavonoids	Flavonols
Lmmp003817	Kaempferol-3-O-(6''-malonyl)glucoside*	Flavonoids	Flavonols
MWSHY0151	Quercetagetin; 3,3',4',5,6,7-Hexahydroxyflavone	Flavonoids	Flavonols
HJAP006	Syringetin-7-O-glucoside*	Flavonoids	Flavonols
Zbpp002027	Isorhamnetin-3-O-(6''-malonyl)glucoside*	Flavonoids	Flavonols
Lmmp000897	Gallocatechin-(4α→8)-gallocatechin	Flavonoids	Flavanols
Cmsp007228	7-O-Methyleriodictyol	Flavonoids	Flavanols
mws0355	Catechin gallate*	Flavonoids	Flavanols
mws1397	Epicatechin gallate*	Flavonoids	Flavanols
Lmhn004960	7-O-Galloyltricetiflavan	Flavonoids	Flavanols
mws1422	Epiafzelechin	Flavonoids	Flavanols
mws2220	Gallocatechin 3-O-gallate	Flavonoids	Flavanols
Wbtn014060	Nigrolineaxanthone K	Flavonoids	Other Flavonoids
Wbtn005631	1,3,7-trihydroxy-2-[3,4,5-trihydroxy-6-(hydroxymethyl)oxan-2-yl]xanthen-9-one	Flavonoids	Other Flavonoids
Ladp005441	Elliptinol	Flavonoids	Other Flavonoids
Wcfn008271	Danthron; 1,8-Dihydroxyanthraquinone	Quinones	Anthraquinone
Zmdn011161	Chrysophanol-9-anthrone	Quinones	Anthraquinone
Zbn005727	1-Hydroxy-5,6-dimethoxy-2-methyl-7-primeverosyl-oxyanthraquinone	Quinones	Anthraquinone
Yhhn000821	kwanzoquinone C	Quinones	Anthraquinone
Zbln013951	1-(3'-methoxy-4'-hydroxybenzyl)-2,7-dihydroxy-4-methoxyphenanthrene	Quinones	PhenAnthraquinones
Zbln003676	7-hydroxy-4-methoxyphenanthrene-2-O-glucoside	Quinones	PhenAnthraquinones
Zbzn008048	Embelin*	Quinones	Quinones
Lmqn005782	4,5,8-Trihydroxy-α-tetralone	Quinones	Quinones
Lmqn003292	4,5,8-Trihydroxy-α-tetralone-5-O-glucoside*	Quinones	Quinones
Zbzp011453	de-O-methyllasiodiplodin*	Quinones	Quinones
Wchn003984	1,4,8-Trihydroxynaphthalene-1-O-glucoside*	Quinones	Naphthol
Lmtn003096	Secoisolariciresinol 4-O-glucoside	Lignans and Coumarins	Lignans
Lazn005469	Buddlenol F glucoside	Lignans and Coumarins	Lignans
WaYn006734	Hedyotisol A	Lignans and Coumarins	Lignans
Lhhp102921	Magnolin	Lignans and Coumarins	Lignans
Cmsp003083	Dehydrodiconiferyl alcohol-4-O-glucoside*	Lignans and Coumarins	Lignans
Lhmp121005	Symplocosin*	Lignans and Coumarins	Lignans
WaYn006596	Buddlenol C*	Lignans and Coumarins	Lignans
WaYn002719	8,8''-Bisguaiacylglycerol*	Lignans and Coumarins	Lignans
Wbmn004986	Lyoniresinol-3α-O-glucoside	Lignans and Coumarins	Lignans
Wbwp006397	(3r,4r)-3-(2h-1,3-benzodioxol-5-ylmethyl)-4-[(4-hydroxy-3-methoxyphenyl)methyl]oxolan-2-one*	Lignans and Coumarins	Lignans
WaYn006966	Ficusesquilignan B	Lignans and Coumarins	Lignans
Wbwn006953	Cagayanone A	Lignans and Coumarins	Lignans
Sayp006468	Acutissimalignan B*	Lignans and Coumarins	Lignans
mws0097	Pinoresinol*	Lignans and Coumarins	Lignans
WaYn007074	3-(2-(4-((3-hydroxy-1-(4-hydroxy-3-methoxyphenyl)-1-oxopropan-2-yl)oxy)-3,5-dimethoxyphenyl)-3-(hydroxymethyl)-7-methoxy-2,3-dihydrobenzofuran-5-yl)acrylaldehyde	Lignans and Coumarins	Lignans
MWS20152	Syringaresinol	Lignans and Coumarins	Lignans
Lazn002213	1-(4-Hydroxy-3-methoxyphenyl)-2-[4-(1,2,3-trihydroxypropyl)-2-methoxyphenoxy]-1,3-propanediol*	Lignans and Coumarins	Lignans
Lazn006735	Erythro-Guaiacylglycerol-β-O-4'-dehydrodisinapyl Ether	Lignans and Coumarins	Lignans
Wbmp002739	Vitexdoin E	Lignans and Coumarins	Lignans
Lazn005628	Hedyotisol B	Lignans and Coumarins	Lignans
WaYn006188	Buddlenol E*	Lignans and Coumarins	Lignans
Lazn005606	[(2S)-2α-[3,5-Dimethoxy-4-[[(αS,βR)-α-(Hydroxymethyl)-β,4-Dihydroxy-3-Methoxyphenethyl]Oxy]Phenyl]-5-(3-Hydroxy-1-Propenyl)-7-Methoxy-2,3-Dihydrobenzofuran]-3β-Ylmethylβ-D-Glucopyranoside	Lignans and Coumarins	Lignans
Hmcn002743	Lirioresinol A	Lignans and Coumarins	Lignans
Lhhp102904	Horsfieldin*	Lignans and Coumarins	Lignans
Lazn002951	Guaiacylglycerol-β-Guaiacyl Ether	Lignans and Coumarins	Lignans
pme2636	Enterodiol	Lignans and Coumarins	Lignans
Cmmp003887	Aketrilignoside B	Lignans and Coumarins	Lignans
Lazn002600	Erythro-Guaiacylglycerol-β-threo-syringylglycerol Ether	Lignans and Coumarins	Lignans
Lskp211249	epieudesmin	Lignans and Coumarins	Lignans
Lmmn002274	Isolariciresinol-9'-O-glucoside*	Lignans and Coumarins	Lignans
Lmyn003971	Dihydrodehydrodiconiferyl alcohol-4-O-glucoside*	Lignans and Coumarins	Lignans
Rfmb26201	Syringaresinol-4'-O-(6''-acetyl)glucoside	Lignans and Coumarins	Lignans
Hmln002355	5'-Methoxymatairesinoside*	Lignans and Coumarins	Lignans
Hmzn004430	Sesamolinol 4'-O-β-D-Glucosyl (1->6)-O-β-D-Glucoside	Lignans and Coumarins	Lignans
Lssp210087	Matairesinol	Lignans and Coumarins	Lignans
WaYn006461	4''-O-(8-Guaiacylglycerol)buddlenol A	Lignans and Coumarins	Lignans
Wbmn002637	4β-hydroxypaulownin	Lignans and Coumarins	Lignans
WaYn005660	Simulanol	Lignans and Coumarins	Lignans
WaYn005957	Hedyotol C*	Lignans and Coumarins	Lignans
WaYn006850	Buddlenol F*	Lignans and Coumarins	Lignans
Lazn006152	Isoshonanin	Lignans and Coumarins	Lignans
Wbwp011870	3-[8-(2-hydroxypropan-2-yl)-3a,10b-dimethyl-3-[1-(5-methyl-6-oxo-2,3-dihydropyran-2-yl)ethyl]-2,3,4,6,8,9,10,10a-octahydro-1H-cyclohepta[e]inden-7-ylidene]propanoic acid	Lignans and Coumarins	Lignans
Ymjm000138	9-O-Methylvibsanol	Lignans and Coumarins	Lignans
Rfmb25702	Pinoresinol-4-O-(6''-acetyl)glucoside	Lignans and Coumarins	Lignans
WaYn002469	4',8''-Bisguaiacylglycerol*	Lignans and Coumarins	Lignans
pmn001378	Pinoresinol-4-O-glucoside*	Lignans and Coumarins	Lignans
Lazn003893	Erythro-Guaiacylglycerol-β-Coniferyl Ether	Lignans and Coumarins	Lignans
Yamn004462	6-((4-(3-hydroxy-2-(4-(3-hydroxypropyl)-2-methylphenoxy)propoxy)-2-methoxyphenoxy)methyl)tetrahydro-2H-pyran-2,3,4,5-tetraol*	Lignans and Coumarins	Lignans
pmn001371	Eucommin A*	Lignans and Coumarins	Lignans
HJN083	Lariciresinol-4'-O-glucoside*	Lignans and Coumarins	Lignans
WaYn004444	7''-O-(Guaiacylglycerol)Feddeiphenol C	Lignans and Coumarins	Lignans
MWSHC2047	Syringaresinol-4'-O-glucoside; Acanthoside B*	Lignans and Coumarins	Lignans
Wbwp010459	5-[(2r,3s,4s,5s)-5-(2h-1,3-benzodioxol-5-yl)-3,4-dimethyloxolan-2-yl]-2-methoxyphenol*	Lignans and Coumarins	Lignans
Jmzn002987	Magnoloside E	Lignans and Coumarins	Lignans
Cmsp005051	Isolariciresinol-9-O-glucoside	Lignans and Coumarins	Lignans
MWSHC20189	Epipinoresinol*	Lignans and Coumarins	Lignans
MWSprf094	Tracheloside	Lignans and Coumarins	Lignans
Yamn004631	viburfordosides G	Lignans and Coumarins	Lignans
Lmdn001925	Olivil-4'-O-glucoside*	Lignans and Coumarins	Lignans
Wbwp006727	(9S,10S)-5,10-dihydroxy-3,4,19-trimethoxy-9,10-dimethyl-15,17-dioxatetracyclo[10.7.0.02,7.014,18]nonadeca-1(19),2,4,6,12,14(18)-hexaen-11-one	Lignans and Coumarins	Lignans
Zahn005590	(7'S,8R,8'R)-3,5'-dimethoxy-3',4,9'-trihydroxy-7',9-epoxy-8,8'-lignan	Lignans and Coumarins	Lignans
Lcyn000106	Dichotomoside A	Lignans and Coumarins	Lignans
Zmdn003480	Cycloolivil-6-O-glucoside*	Lignans and Coumarins	Lignans
Jmzn003632	Manglieside D	Lignans and Coumarins	Lignans
Hahn002315	syringaresinol-4-O-β-D-glucopyranoside*	Lignans and Coumarins	Lignans
Lmsp004450	Dehydrodiconiferyl alcohol	Lignans and Coumarins	Lignans
Yarn005295	Tortoside A*	Lignans and Coumarins	Lignans
Lmsp003655	Dehydrodiconiferyl alcohol-gamma'-O-glucoside*	Lignans and Coumarins	Lignans
Wbwp006298	[(1R,11R,12R,13S)-13-(hydroxymethyl)-1-(3,4,5-trimethoxyphenyl)-5,7,14-trioxatetracyclo[9.2.1.02,10.04,8]tetradeca-2,4(8),9-trien-12-yl]methanol	Lignans and Coumarins	Lignans
Lazn004429	(2S,3R,4S,6S)-2-[4-[(1R,2R)-1,3-Dihydroxy-2-[4-[(E)-3-hydroxyprop-1-enyl]-2,6-dimethoxyphenoxy]propyl]-2,6-dimethoxyphenoxy]-6-(hydroxymethyl)oxane-3,4-diol*	Lignans and Coumarins	Lignans
Lazn003564	Picraquassioside C	Lignans and Coumarins	Lignans
Lazn002030	Guaiacylglycerol-β-Guaiacyl Ether glucoside	Lignans and Coumarins	Lignans
MWSmce265	Decursinol	Lignans and Coumarins	Coumarins
Lmbn001181	Fraxetin-7,8-di-O-glucoside	Lignans and Coumarins	Coumarins
Yalp002838	4-Methoxy-5-(hydroxymethyl)-2H-1-benzopyran-2-one*	Lignans and Coumarins	Coumarins
Lmhn003439	Phellodenol H	Lignans and Coumarins	Coumarins
Zmln002252	Sideretin (5,7,8-Trihydroxy-6-methoxycoumarin)	Lignans and Coumarins	Coumarins
Zmpn002553	Cichoriin*	Lignans and Coumarins	Coumarins
Lhqp101805	Skimmin (7-Hydroxycoumarin-7-O-glucoside)	Lignans and Coumarins	Coumarins
mws1015	Esculin (6,7-Dihydroxycoumarin-6-O-glucoside)*	Lignans and Coumarins	Coumarins
Cmyn001328	Daphnin*	Lignans and Coumarins	Coumarins
pmb1207	O-Feruloyl 3-hydroxycoumarin	Lignans and Coumarins	Coumarins
Lmbp102601	7-Hydroxycoumarin;Umbelliferone*	Lignans and Coumarins	Coumarins
MW0136698	6-Hydroxycoumarin*	Lignans and Coumarins	Coumarins
Lcyp000672	Mahaleboside	Lignans and Coumarins	Coumarins
Lmjp101406	7-Methoxy-8-(2'-ethoxy-3'-hydroxy-3'-methylbutyl)coumarin	Lignans and Coumarins	Coumarins
Lcyp000676	Isoscopoletin-β-D-glucoside*	Lignans and Coumarins	Coumarins
Lmzp003497	Marmin[7-(6',7'-Dihydroxygeranyloxy)coumarin]	Lignans and Coumarins	Coumarins
Zmxp004471	Thunberginol B	Lignans and Coumarins	Coumarins
Lmwp102713	(S)-Peucedanol	Lignans and Coumarins	Coumarins
Zbsp004940	6-Hydroxy-7-methoxycoumarin*	Lignans and Coumarins	Coumarins
Lhqp101807	Osthole*	Lignans and Coumarins	Coumarins
MWSHC20172	Isoscopoletin (6-Hydroxy-7-Methoxycoumarin)	Lignans and Coumarins	Coumarins
Lmbn001162	Esculetin-7-O-glucoside*	Lignans and Coumarins	Coumarins
mws1013	Esculetin (6,7-Dihydroxycoumarin)	Lignans and Coumarins	Coumarins
Lmjp101401	Bismurrangatin	Lignans and Coumarins	Coumarins
Lhmp122013	2-(hydroxymethyl)-5-methoxy-3-(3-methoxy-4-((3,4,5-trihydroxy-6-(hydroxymethyl)tetrahydro-2H-pyran-2-yl)oxy)phenyl)-2,3-dihydro-9H-[1,4]dioxino[2,3-h]chromen-9-one	Lignans and Coumarins	Coumarins
Lmbp002962	Isofraxetin	Lignans and Coumarins	Coumarins
Hmhp002580	Methylpicraquassioside A	Lignans and Coumarins	Coumarins
Cmpp003619	6,7-Dihydroxy-4-methylcoumarin	Lignans and Coumarins	Coumarins
MWSCX014	Scopoletin (7-Hydroxy-6-methoxycoumarin)*	Lignans and Coumarins	Coumarins
Qmzp101808	Avicennol*	Lignans and Coumarins	Coumarins
Lajp003585	Murrayacarpin A glucoside*	Lignans and Coumarins	Coumarins
MWSmce024	Scopoletin-7-O-glucoside (Scopolin)	Lignans and Coumarins	Coumarins
Cmpp008880	Suberosin*	Lignans and Coumarins	Coumarins
pmf0174	1-Decanol*	Others	Alcohol compounds
Lmqp006559	2-Amino-1,3-eicosanediol	Others	Alcohol compounds
Jmzn006005	3,4-methylenedioxy cinnamyl alcohol	Others	Alcohol compounds
MWSmce158	(R)-Citronellol	Others	Alcohol compounds
pmf0175	2-Decanol*	Others	Alcohol compounds
pme1261	D-Panthenol	Others	Alcohol compounds
pmf0348	2,6-Dimethyl-7-octene-2,3,6-triol	Others	Alcohol compounds
pmp001229	Senkyunolide K	Others	Lactones
Lmmn006306	Machilusolide D	Others	Lactones
Cmyp007180	Dihydroactinidiolide	Others	Lactones
MW0052697	Ethyl (±)-3-hydroxyoctanoate	Others	Lactones
Hmjp000461	3-O-Glucoside-3-hydroxy-y-butyrolactone	Others	Lactones
pmp001230	Senkyunolide M	Others	Lactones
Zmcp102201	Senkyunolide B*	Others	Lactones
pmb0128	δ-Tridecalactone	Others	Lactones
Wcfn003424	Coumaroyl Quinic Acid*	Others	Others
Lchp000221	(Z)-3-Ethylidene-7-hydroxy-6-methoxyphthalide*	Others	Others
Hasp010605	(S)-2,3-dihydroxypropyl (9Z,12Z,15Z)-octadeca-9,12,15-trienoate	Others	Others
Wcdp006912	Lauryldiethanolamine*	Others	Others
Wcdp010708	Octadeca-2,9,12,15-tetraen-1-ol	Others	Others
Wcdp006247	1-18:3-LysoPC	Others	Others
Wchn003892	Juglanoside E*	Others	Others
Wcfp003475	6,7-dimethyl-4-(2,3,4,5-tetrahydroxypentyl)-1H-quinoxaline-2,3-dione*	Others	Others
Zbzp007397	5,6,7,7a-tetrahydro-4,4,7a-trimethyl-2(4H)-benzofuranone	Others	Others
ZbWn007525	(11E,14E)-16-hydroxyoctadeca-11,14,17-trienoic 4-methylbenzenesulfonic anhydride	Others	Others
Wcsn011332	Ethyl (10Z,13Z)-hexadeca-10,13-dienoate	Others	Others
Zmsn006790	Cormusglucoside A*	Others	Others
Wcsn010496	6,10,14-Trimethylpentadeca-5,9-Diene-2,13-Dione	Others	Others
Wcsn010375	Methyl (4E,8E,11E)-5,9,13-trimethyltetradeca-4,8,11-trienoate*	Others	Others
Wcdp006741	1-(9Z,12Z-Octadecadienoyl)-Sn-Glycero-3-Phosphocholine*	Others	Others
Lhgp102119	1,7-bis(4-Hydroxyphenyl)-1,4,6-heptatrien-3-one	Others	Others
Wcdp005264	Tetradecasphinganine*	Others	Others
Wcfn003882	(2S,3S,4S,5R,6R)-6-(3-benzoyloxy-2-hydroxypropoxy)-3,4,5-trihydroxyoxane-2-carboxylic acid	Others	Others
Wcsn009782	(E)-12-hydroxy-2,6,10-trimethyltrideca-2,5-dien-4-one	Others	Others
Wcsn010254	4-[3-(4,8-dimethylnona-3,7-dienyl)-3-methyloxiran-2-yl]butan-2-one*	Others	Others
Wcdn003896	(6R,9S)-3-oxo-α-ionol apiofuranosylglucopy-ranoside	Others	Others
zjgp122326	Pyridine-4-formyl-O-β-D-glucopyranoside*	Others	Others
MWSHC2069	(2R,5S,8S)-3,4,5,6,7,8-Hexahydro-2,5-dihydroxy-2,5-dimethyl-8-(1-methylethyl)-1(2H)-naphthalenone	Others	Others
Zmsn006969	Cormusglucoside B*	Others	Others
Lcyn000686	Prunustomentosanan A*	Others	Others
Wcsn011122	(5Z,10E,14S)-14-hydroxy-2,6,10-trimethylpentadeca-5,10-dien-4-one	Others	Others
Wcfp002357	N6-Threonylcarbamoyladenosine	Others	Others
Yaap009385	Myrtucommulone B	Others	Others
Wcsn010224	14-hydroxy-2,6,10-trimethylpentadeca-2,5,10-trien-4-one*	Others	Others
Lmsn003522	Uvafzelic acid	Others	Others
Wcsn010287	2,10,14-Trimethyl-6-methylene-16-acetoxyhexadeca-2,10,14-triene-4,7-dione	Others	Others
Lscp211210	Neosedumoside II*	Others	Others
Wchn003447	(S)-4-(3-Hydroxyphenyl)-4-(beta-D-glucopyranosyloxy)butyric acid	Others	Others
Wcdn001824	2-Hydroxy-5-[3,4,5-Trihydroxy-6-(Hydroxymethyl)Oxan-2-Yl]Oxybenzoic Acid	Others	Others
Wcgn008207	Aspidinol	Others	Others
Lssp210123	α-Conidendrin	Others	Others
Lcsn000626	Rubusin B	Others	Others
Yaan000442	(3S,4S,5R)-2-(((2R,3S,4S,5R,6R)-6-(((2S,3S,4S,5R)-3,4-dihydroxy-2,5-bis(hydroxymethyl)tetrahydrofuran-2-yl)oxy)-3,4,5-trihydroxytetrahydro-2H-pyran-2-yl)methoxy)-3,4,5-trihydroxycyclohexane-1-carboxylic acid	Others	Others
Wcgp010436	3-(Cyclohexen-1-yl)-2-hydroxy-4a,5-dimethyl-2,3,4,5,6,8a-hexahydronaphthalen-1-one	Others	Others
Wcdp000970	acetophenone	Others	Others
Zmsp009001	2-hydroxy-3-{[3,4,5-trihydroxy-6-({[3,4,5-trihydroxy-6-(hydroxymethyl)oxan-2-yl]oxy}methyl)oxan-2-yl]oxy}propyl octadeca-9,12-dienoate	Others	Others
Wchn004079	Juglanoside D	Others	Others
zjgp122321	4-O-acetyl-3-O-caffeoyl-2-C-methyl-D-erythronate	Others	Others
Wcgp003250	2-Methyl-3-hydroxyindan-1-one	Others	Others
Zasn010461	Pentadecanoic acid,14-methyl-,methyl ester	Others	Others
Hamp010390	cytosporone C*	Others	Others
Lhfp112926	Myricatomentogenin*	Others	Others
Yaan003628	(5R,6S)-5,6-dihydroxy-1-[2-hydroxy-4-methoxy-6-[(2S,3R,4S,5S,6R)-3,4,5-trihydroxy-6-(hydroxymethyl)oxan-2-yl]oxyphenyl]octan-1-one	Others	Others
Lchn000012	Alangilignoside D	Others	Others
Lhyp111013	2(4H)-benzofuranone	Others	Others
Wcqn002538	(2R,3R,4S,5S,6R)-2-[[(1R,2R,4R)-2,4-dihydroxy-1,2,3,4-tetrahydronaphthalen-1-yl]oxy]-6-(hydroxymethyl)oxane-3,4,5-triol	Others	Others
Zjbn102543	Bletilols B	Others	Others
Wcgp010223	3-(Cyclohexen-1-yl)-2-hydroxy-4a,5-dimethyl-2,3,4,5,6,7,8,8a-octahydronaphthalen-1-one*	Others	Others
Wchn004723	{6-[(4,8-dihydroxynaphthalen-1-yl)oxy]-3,4,5-trihydroxyoxan-2-yl}methyl 3,4,5-trihydroxybenzoate	Others	Others
MW0110631	1-Phenylethylamine	Others	Others
Zahp011689	2,2-dimethylchromene-6-carboxylic acid*	Others	Others
Zamn006847	glycoric acid	Others	Others
Wagp005508	3-Hydroxy-Beta-Ionone 3-(6''-Malonyl)Glucoside	Others	Others
MWSHC2042	(2E)-3-(1-Hydroxy-2,6,6-trimethyl-4-oxo-2-cyclohexen-1-yl)-2-propenoic acid	Others	Others
MW0109217	Phenylbutyrylglutamine	Others	Others
Lhmp122023	3-O-caffeoyl malonyl quinic acid	Others	Others
mws0458	Vanillin; 4-Hydroxy-3-Methoxybenzaldehyde*	Others	Aldehyde compounds
mws1350	Syringaldehyde; 4-Hydroxy-3,5-Dimethoxybenzaldehyde	Others	Aldehyde compounds
Hmgn001653	Protocatechualdehyde*	Others	Aldehyde compounds
Lmbn001981	2,5-Dihydroxybenzaldehyde*	Others	Aldehyde compounds
mws0628	4-Hydroxybenzaldehyde	Others	Aldehyde compounds
Zahp007439	3,4-Methylenedioxycinnamaldehyde	Others	Aldehyde compounds
pmf0440	4-MethoxycinnaMaldehyde	Others	Aldehyde compounds
Lmbn005172	2,6-Dimethoxybenzaldehyde*	Others	Aldehyde compounds
MWSmce463	Mesitaldehyde	Others	Aldehyde compounds
Zmdp000376	4-Guanidinobutanal	Others	Aldehyde compounds
zjbp110819	6,7-dimethoxy-2-[2-phenylethyl]chromone	Others	Chromone
zjbp110804	6,7-dimethoxy-2-[2-(4'-hydroxy-3'-methoxyphenyl)ethyl]chromone*	Others	Chromone
Latp003160	6-Hydroxymellein	Others	Chromone
Hmyn000254	Tababiphenyl C	Others	Chromone
Hmyp002315	3,5,7,4'-Tetrahydroxy-Coumaronochromone	Others	Chromone
pme3705	D-Glucoronic acid*	Others	Saccharides
mws1164	D-Fructose*	Others	Saccharides
mws4170	D-Glucose*	Others	Saccharides
Zamn00402	sorbose*	Others	Saccharides
Zmpn000095	Sorbitol-6-phosphate	Others	Saccharides
Lmbn000198	3-Dehydro-L-Threonic Acid*	Others	Saccharides
Hmln000297	Inositol*	Others	Saccharides
MWSmce165	L-Fucitol	Others	Saccharides
mws0264	D-Trehalose*	Others	Saccharides
mws1189	D-Galacturonic acid*	Others	Saccharides
Lmqn000432	1-(sn-Glycero-3-phospho)-1D-myo-inositol	Others	Saccharides
pme2253	L-Gulono-1,4-Lactone	Others	Saccharides
MWS0559	1,6-anhydro-β-D-glucose	Others	Saccharides
MWSmce203	D-Cellobiose	Others	Saccharides
pme0534	Gluconic acid	Others	Saccharides
Zmyn000230	2-Dehydro-3-deoxy-L-arabinonate*	Others	Saccharides
mws0889	D-Threonic Acid	Others	Saccharides
mws2608	N-Acetyl-D-galactosamine	Others	Saccharides
mws0214	D-Sorbitol	Others	Saccharides
Zmpn000199	D-Galactaric acid*	Others	Saccharides
Zmyn000108	D-Saccharic acid*	Others	Saccharides
pmb0786	D-Glucosamine	Others	Saccharides
Zmyn000083	D-Glucose 1,6-bisphosphate	Others	Saccharides
pmf0139	D-Galactose*	Others	Saccharides
mws0344	D-Xylonic acid	Others	Saccharides
mws1333	Melibiose	Others	Saccharides
pma6455	Ribulose-5-phosphate	Others	Saccharides
mws2523	Trehalose 6-phosphate	Others	Saccharides
MWS1983	Maltitol	Others	Saccharides
Hmcn000192	Sedoheptulose	Others	Saccharides
Zmyn000110	D-Glucosamine 1-phosphate	Others	Saccharides
pme2529	1,5-Anhydro-D-glucitol	Others	Saccharides
mws1589	D-Panose	Others	Saccharides
Zmzn000078	Dihydroxyacetone phosphate	Others	Saccharides
MWSslk235	Allitol	Others	Saccharides
Wcdn000434	5-{[3,4-dihydroxy-2,5-bis(hydroxymethyl)oxolan-2-yl]oxy}-2-(hydroxymethyl)oxane-2,3,4-triol	Others	Saccharides
mws4163	Nystose	Others	Saccharides
mws1090	D-Glucose-1-phosphate*	Others	Saccharides
Zmzn000079	D-Erythrose-4-phosphate	Others	Saccharides
pme0519	D-Sucrose*	Others	Saccharides
Zmgn000447	3-Phospho-D-glyceric acid	Others	Saccharides
MWS0442	Maltotriose	Others	Saccharides
pmf0138	D-Mannose*	Others	Saccharides
Lmsn000381	D-Maltose*	Others	Saccharides
Lmxn000398	D-Lactose*	Others	Saccharides
mws1080	Galactinol	Others	Saccharides
pme3311	D-Fructose-1,6-biphosphate	Others	Saccharides
Wasn000495	6-O-alpha-L-arabinopyranosyl-D-glucopyranose	Others	Saccharides
Jmbn003202	Butyl Beta-D-Fructopyranoside	Others	Saccharides
MWSmce199	L-Xylose*	Others	Saccharides
Lmqn000351	Rutinose	Others	Saccharides
pme0500	D-Melezitose	Others	Saccharides
mws0866	D-Glucose 6-phosphate*	Others	Saccharides
MWS2442	D-Fructose 6-Phosphate*	Others	Saccharides
Zmgn000173	D-Ribose	Others	Saccharides
pme3163	D-Sedoheptuiose 7-phosphate	Others	Saccharides
mws1155	D-Mannitol	Others	Saccharides
pmb2653	DMelezitose O-rhamnoside	Others	Saccharides
MWSmce676	D-Arabinose*	Others	Saccharides
mws2104	D-Pinitol	Others	Saccharides
ML10171848	D-Arabinono-1,4-lactone*	Others	Saccharides
Lcsn000341	3'-Fucosyllactose	Others	Saccharides
Lmmn000214	Solatriose	Others	Saccharides
pmb3081	Glucaric acid-1-Phosphate	Others	Saccharides
pmb3079	N-Acetyl-D-glucosamine-1-phosphate	Others	Saccharides
MW0112142	2'-Fucosyl-D-lactose	Others	Saccharides
mws1089	Sucrose-6-phosphate	Others	Saccharides
Zmgp004297	1-phenyl-7-(4-hydroxyphenyl)-4-ene-3-heptanone	Others	Ketone compounds
Wbsp000107	(2s)-2-[(5s)-5-hydroxyhexa-1,3-dien-1-yl]-5-methoxy-4-[(3r)-3-methoxybutanoyl]-2-methylfuran-3-one	Others	Ketone compounds
Lman002117	Grevilloside Q	Others	Ketone compounds
Hmln003754	Icariside E5*	Others	Ketone compounds
Lmmp003215	Icariside B2	Others	Ketone compounds
Wbmp003302	Frambinone	Others	Ketone compounds
pmn001423	Roseoside	Others	Ketone compounds
Lmjn010508	Fusarester B	Others	Ketone compounds
Zmgp005229	(5S)-5-Methoxy-1,7-diphenyl-3-heptanone	Others	Ketone compounds
MWSmce466	4-Hydroxyacetophenone*	Others	Ketone compounds
Lmmp003349	Byzantionoside A*	Others	Ketone compounds
pmp000452	Annuionone D	Others	Ketone compounds
pma3101	Nicotinate D-ribonucleoside	Others	Vitamin
Lmbp000668	Isonicotinic acid	Others	Vitamin
pme2266	Biotin	Others	Vitamin
mws0133	Nicotinamide	Others	Vitamin
pme0490	Nicotinic acid (Vitamin B3)	Others	Vitamin
Zmjp000624	Pyridoxal	Others	Vitamin
pmb0789	Pyridoxine-5'-O-glucoside*	Others	Vitamin
pme1383	Pyridoxine	Others	Vitamin
MA10039492	Dehydroascorbic acid	Others	Vitamin
mws1337	D-Pantothenic Acid*	Others	Vitamin
pme2165	Orotic acid (Vitamin B13)	Others	Vitamin
pma1751	N-(beta-D-Glucosyl)nicotinate*	Others	Vitamin
Lmlp002765	Stilbostemin B; 3,5-Dihydroxy-4-Methylbibenzyl	Others	Stilbene
Wayp002004	N-Formyl nornicotine	Alkaloids	Pyridine alkaloids
Zblp001009	3-pyridine-methanol-O-β-D-glucopyranosyl*	Alkaloids	Pyridine alkaloids
pme2268	Trigonelline	Alkaloids	Pyridine alkaloids
MWSmce016	Nicotinic Acid Methyl Ester(Methyl Nicotinate)	Alkaloids	Pyridine alkaloids
Zbqp002613	1-(2-(pyridin-3-yl)-2,3-dihydro-1H-pyrrol-1-yl)propan-1-one	Alkaloids	Pyridine alkaloids
YC512113	Cotinine-glucoside	Alkaloids	Pyridine alkaloids
MWSmce582	Methyl L-pyroglutamate	Alkaloids	Pyrrole alkaloids
MWStz040	Pterolactam*	Alkaloids	Pyrrole alkaloids
Zmsp000758	1-(Hydroxymethyl)hexahydro-1h-pyrrolizin-2-ol	Alkaloids	Pyrrole alkaloids
MWSmce157	Stachydrine	Alkaloids	Pyrrole alkaloids
Zmyp00416	(4S,5S,6R)-2-(((1S,7aR)-hexahydro-1H-pyrrolizin-1-yl)methoxy)-6-(hydroxymethyl)tetrahydro-2H-pyran-3,4,5-triol	Alkaloids	Pyrrole alkaloids
Yacp000453	3-hydroxy-1-methylpyrrolidin-2-one*	Alkaloids	Pyrrole alkaloids
MWSslk106	2-Phenylethylamine	Alkaloids	Benzylphenylethylamine alkaloids
Hmgp002804	N1,N10-Dihydrocaffeoylspermidine	Alkaloids	Phenolamine
Lmmp003112	Caffeoyl-dihydrocaffeoyl spermidine	Alkaloids	Phenolamine
Lmmp002914	Bis(Dihydrocaffeoyl)spermidine	Alkaloids	Phenolamine
Zblp005777	N-trans-ferulicacidacylp-hydroxyphenylethylamine*	Alkaloids	Phenolamine
Lmmp003591	Tri(dihydrocaffeoyl)spermine	Alkaloids	Phenolamine
Lmmp003167	Bis(Caffeoyl)Spermidine	Alkaloids	Phenolamine
MWStz221	N-Cis-Feruloyltyramine*	Alkaloids	Phenolamine
Wafp003258	N-Feruloylphenylacetamide glucoside	Alkaloids	Phenolamine
pmp000727	Feruloylhistamine	Alkaloids	Phenolamine
Qagp006800	Lyciumamide B	Alkaloids	Phenolamine
Qagp002804	Lycibarbarspermidine A	Alkaloids	Phenolamine
Hmjp006104	N-Cis-Feruloyl-3'-O-methyldopamine*	Alkaloids	Phenolamine
Lskp211287	N-trans-feruloyl-3'-O-methyl dopamine*	Alkaloids	Phenolamine
Wahp006178	Di-p-coumaroylferuloyl Spermidine	Alkaloids	Phenolamine
Qagp003587	N-Monocinnamoylputrescine*	Alkaloids	Phenolamine
Lssp210092	N-trans-ferulic tyramine*	Alkaloids	Phenolamine
Lmmp001410	Dihydrocaffeoylputrescine	Alkaloids	Phenolamine
Hmcp009963	Candicine	Alkaloids	Phenolamine
Lmmp002013	Dihydroferuloylputrescine	Alkaloids	Phenolamine
pmb0490	p-Coumaroylputrescine	Alkaloids	Phenolamine
Wafp004334	N-Feruloyltyramine 4'-glucoside	Alkaloids	Phenolamine
pmn001726	N1-Caffeoyl-N10-dihydrocaffeoylspermidine	Alkaloids	Phenolamine
MWSmce089	p-Coumaroyltyramine*	Alkaloids	Phenolamine
pmp001253	Cannabisin F	Alkaloids	Phenolamine
pmb0494	Sinapoylputrescine	Alkaloids	Phenolamine
Lmmp002023	Caffeoylspermine	Alkaloids	Phenolamine
mws1433	N-Feruloyltyramine; Moupinamide*	Alkaloids	Phenolamine
pmp001187	1-(Dihydroxyphenyl)-N2,N3-bis(4-hydroxyphenethyl)-(5-8)-dimethoxy-1,2dihydronaphthalene-2,3-dicarboxamide	Alkaloids	Phenolamine
Lmmp002121	Bis(Dihydrocaffeoyl)spermine	Alkaloids	Phenolamine
pmb0323n	N-Caffeoylputrescine	Alkaloids	Phenolamine
Hmgp006701	Lyciumamide A	Alkaloids	Phenolamine
MWStz038	Grossamide	Alkaloids	Phenolamine
Lahp003147	N,N-cinnamoylbutanediamine*	Alkaloids	Phenolamine
pmn001722	Lycibarbarspermidine I	Alkaloids	Phenolamine
Qagp002640	Lycibarbarspermidine H	Alkaloids	Phenolamine
MWS1749	p-Aminoanisole	Alkaloids	Phenolamine
Wafp002146	1-Pyrrolizino-3-(3,4-Dihydroxyphenyl)-2-Propene-1-One	Alkaloids	Phenolamine
HJAP050	N-Feruloyl-3-methoxytyramine*	Alkaloids	Phenolamine
Hmjp005906	N-Trans-Feruloyl-3'-O-methyldopamine*	Alkaloids	Phenolamine
Lmmp001993	Dihydrocaffeoylspermine	Alkaloids	Phenolamine
Zahp005843	N-Trans-Sinapoyltyramine	Alkaloids	Phenolamine
Lmqp002784	Salicylamide	Alkaloids	Phenolamine
Wahp006114	Tri-p-coumaroyl Spermidine	Alkaloids	Phenolamine
Lmhp003013	N-Feruloyl-Cadaverine	Alkaloids	Phenolamine
Hmtn001358	2-(D-Glucosyloxy)-4-hydroxybenzeneacetonitrile	Alkaloids	Phenolamine
Hmgp006095	Lyciumamide C	Alkaloids	Phenolamine
pmp001073	Synephrine; 4-[1-Hydroxy-2-(methylamino)ethyl]phenol	Alkaloids	Phenolamine
MWSmce098	Nonivamide	Alkaloids	Phenolamine
MWStz070	N-(2-Hydroxy-4-methoxyphenyl)acetamide	Alkaloids	Phenolamine
Wafp004987	N-Feruloylphenylacetamide	Alkaloids	Phenolamine
Hmjp005089	(2Z)-N-[2-(3,4-Dihydroxyphenyl)-2-hydroxyethyl]-3-(4-methoxyphenyl)-2-propenamide*	Alkaloids	Phenolamine
Qmjp110218	N-Feruloyl dopamine*	Alkaloids	Phenolamine
Lmlp003161	N-Feruloylputrescine	Alkaloids	Phenolamine
Lmmp001894	Dihydrocaffeoylspermidine	Alkaloids	Phenolamine
pmp001189	(5-8)-Hydroxy-1-(hydroxyldimethoxyphenyl)-N2,N3-bis(4-hydroxyphenethyl)-(5-8)-dimethoxy-1,2-dihydronaphthalene-2,3-dicarboxamide	Alkaloids	Phenolamine
pmn001720	Lycibarbarspermidine C	Alkaloids	Phenolamine
pmp001190	(5-8)-Hydroxy-1-(hydroxylmethoxyphenyl)-N2,N3-bis(4-hydroxyphenethyl)-(5-8)-dimethoxy-1,2-dihydronaphthalene-2,3-dicarboxamide	Alkaloids	Phenolamine
Lmmp003443	Dicaffeoylspermine	Alkaloids	Phenolamine
pmn001724	Lycibarbarspermidine B	Alkaloids	Phenolamine
Wafp004641	N-Feruloyltyramine 4-glucoside	Alkaloids	Phenolamine
MWStz208	N-Feruloyloctopamine*	Alkaloids	Phenolamine
Yhjp002824	Lythridine	Alkaloids	Quinorisidine alkaloids
Labp005146	Isoalangiside	Alkaloids	Quinorisidine alkaloids
Lmlp002994	5-Hydroxyquinoline	Alkaloids	Quinoline alkaloids
Lwhp010633	Echinopsine	Alkaloids	Quinoline alkaloids
Wcjp002598	8-hydroxyquinoline	Alkaloids	Quinoline alkaloids
Lahp002608	3,5-Dihydro-2H-Furo[3,2-C]Quinolin-4-One*	Alkaloids	Quinoline alkaloids
pmp001195	Calystegine B1	Alkaloids	Tropan alkaloids
pmp001196	Calystegine A3	Alkaloids	Tropan alkaloids
MWStz135	Pseudotropine	Alkaloids	Tropan alkaloids
pmp001194	Calystegine B2	Alkaloids	Tropan alkaloids
MWSmce300	Nortropine	Alkaloids	Tropan alkaloids
Ysjp000315	Pipecolic acid	Alkaloids	Piperidine alkaloids
pmp000097	Guvacoline	Alkaloids	Piperidine alkaloids
pmp001198	6-Deoxyfagomine	Alkaloids	Piperidine alkaloids
Zmsp000380	6-O-α-D-galactosyl-1-deoxynojirimycin*	Alkaloids	Piperidine alkaloids
Zmsp000179	2-O-α-D-galactosyl-1-deoxynojirimycin*	Alkaloids	Piperidine alkaloids
Zmsp000494	2-O-α-D-glucosyl-1-deoxynojirimycin*	Alkaloids	Piperidine alkaloids
MWSmce469	Spinacine	Alkaloids	Piperidine alkaloids
mws1375	Nicotianamine	Alkaloids	Alkaloids
mws0983	N-Oleoylethanolamine	Alkaloids	Alkaloids
Zasp102439	m-Aminophenylacetylene*	Alkaloids	Alkaloids
Wbjp001169	o-Carboxy-5-hydroxytryptamine	Alkaloids	Alkaloids
Layp000971	Hydroxymenisdaurin D*	Alkaloids	Alkaloids
pmb1912	10-Formyltetrahydrofolic Acid	Alkaloids	Alkaloids
pmb0069	Benzamide	Alkaloids	Alkaloids
Wbkp008793	(3S,3'S)-N,N'-((1R,2R)-4-((3,4,5-trihydroxy-6-methyltetrahydro-2H-pyran-2-yl)oxy)cyclohexane-1,2-diyl)bis(2-methyl-2,3,4,9-tetrahydro-1H-pyrido[3,4-b]indole-3-carboxamide)	Alkaloids	Alkaloids
Zahp013728	octadecanoic acid pyrrolidide	Alkaloids	Alkaloids
MWSmce349	Laurocapram	Alkaloids	Alkaloids
Wccp011838	Octadec-8-enamide	Alkaloids	Alkaloids
Zahp012577	Octadecadienamide	Alkaloids	Alkaloids
Zahp006511	N-((9E,11E)-13-methylpentadeca-9,11-dien-1-yl)acetamide	Alkaloids	Alkaloids
Wcfp007836	Tetradecyldiethanolamine	Alkaloids	Alkaloids
Lamp000484	4-Methylazetidine-2-Carboxylic acid*	Alkaloids	Alkaloids
Wbjp002330	(3S)-1,3-dihydroxy-2,3,3a,4-tetrahydropyrrolo[2,1-b]quinazolin-9(1H)-one	Alkaloids	Alkaloids
Hahp000801	alanine betaine*	Alkaloids	Alkaloids
Wbsp000191	3,7,11-trimethyl-2-oxa-6,10,13-triazatricyclo[7.3.1.05,13]tridecane	Alkaloids	Alkaloids
Xmbn009362	Arenarine B	Alkaloids	Alkaloids
MWSmce548	Betaine	Alkaloids	Alkaloids
Wccp002870	2-Amino-5-[(1-Carboxy-2-Phenylethyl)Amino]-5-Oxopentanoic acid*	Alkaloids	Alkaloids
Wccp005403	Acetyl-Caranine*	Alkaloids	Alkaloids
Wbmp010544	10-Hydroxymethyllycaconitine	Alkaloids	Alkaloids
Lmxn006423	2(3H)-Benzothiazolone	Alkaloids	Alkaloids
Wbkp008219	(3S,3'S)-N,N'-((1R,2R)-5-((3,4,5-trihydroxy-6-methyltetrahydro-2H-pyran-2-yl)oxy)cyclohex-3-ene-1,2-diyl)bis(2-methyl-2,3,4,9-tetrahydro-1H-pyrido[3,4-b]indole-3-carboxamide)	Alkaloids	Alkaloids
HJN016	Cannabisin D	Alkaloids	Alkaloids
Wbmp006077	1,10-dimethoxy-6,6-dimethyl-2,9-di(propan-2-yloxy)-5,6,6a,7-tetrahydro-4H-dibenzo[de,g]quinolin-6-ium	Alkaloids	Alkaloids
Qmhp120619	Paxiphylline D	Alkaloids	Alkaloids
Wbsp001938	Casuarine Analogue*	Alkaloids	Alkaloids
Wcdp010864	Hexadecanamide	Alkaloids	Alkaloids
pmp000476	N-Isobutyl-4,5-epoxy-2E-decaenamide	Alkaloids	Alkaloids
pme1002	L-Tyramine	Alkaloids	Alkaloids
Wbmp007680	5,6,6a,7-tetrahydro-1,2,9,10-tetraethoxy-6-n-pentyl-4H-dibenzo[de,g]quinolin-4-ol	Alkaloids	Alkaloids
Wcjp001032	9-[(2S,3S,4S,5R)-3,4-dihydroxy-5-(hydroxymethyl)oxolan-2-yl]-1H-purin-6-one	Alkaloids	Alkaloids
Wbmp008130	Anthriscifolcine A*	Alkaloids	Alkaloids
mws1038	Pantetheine	Alkaloids	Alkaloids
Lskp211279	Longitubanine A	Alkaloids	Alkaloids
pmp001269	Hexadecyl ethanolamine	Alkaloids	Alkaloids
Zmbp000490	Valerine	Alkaloids	Alkaloids
MWS3020	N-Acetylcadaverine	Alkaloids	Alkaloids
pme3081	4-(Aminomethyl)-5-(hydroxymethyl)-2-methylpyridin-3-ol	Alkaloids	Alkaloids
MWS1840	Triethylamine	Alkaloids	Alkaloids
Wbmp007707	1-[[3-[4-[[(1R)-6,7-dimethoxy-2-methyl-3,4-dihydro-1H-isoquinolin-1-yl]methyl]phenoxy]-4-methoxyphenyl]methyl]-6,7-dimethoxy-2-methylisoquinolin-2-ium	Alkaloids	Alkaloids
Zahp012750	Methyl pheophorbide a	Alkaloids	Alkaloids
Ybsp009454	Cepharanthine	Alkaloids	Alkaloids
MWSslk070	Cyclen	Alkaloids	Alkaloids
Wbsp000161	Lannotinidine C	Alkaloids	Alkaloids
Lmmp002080	N-(4-Aminobutyl)benzamide	Alkaloids	Alkaloids
Lmmp001673	2-Ethyl-3-methylmaleimide-N-glucoside	Alkaloids	Alkaloids
Ylyp002274	niazidin	Alkaloids	Alkaloids
Wbmp003991	11-Ethyl-6,18-dimethoxy-13-(methoxymethyl)-11-azoniahexacyclo[7.7.2.12,5.01,10.03,8.013,17]nonadecane-4,8,9,16-tetrol	Alkaloids	Alkaloids
Qmwp111506	1-Methyl-2-[(Z)-6-undecyl]-4(1H)-quinolone	Alkaloids	Alkaloids
Wbjp005620	Tribulusamide B	Alkaloids	Alkaloids
Lszp210010	Tatarine*	Alkaloids	Alkaloids
Lskp211278	Oxypinnatanine A	Alkaloids	Alkaloids
Wbjp001390	3-(2-aminoethyl)-4,7-dihydro-1-indole-5,6-dione	Alkaloids	Alkaloids
MWSmce331	Azetidine-2-carboxylic acid*	Alkaloids	Alkaloids
Wbmp008021	(14-Ethyl-4,6,19-trimethoxy-9,11-dioxa-14-azaheptacyclo[10.7.2.12,5.01,13.03,8.08,12.016,20]docosan-21-yl)acetate*	Alkaloids	Alkaloids
pmp000479	N-Isobutyl-2E,4E-dodedienamide	Alkaloids	Alkaloids
Lchp000007	Zanthoamide B	Alkaloids	Alkaloids
MW0009121	N-Methylbenzylamine	Alkaloids	Alkaloids
HJKP000649	N-benzylformamide	Alkaloids	Alkaloids
Wbjp005803	(Z)-5-((1E,3Z)-3-((3,4-dihydroxyphenethyl)imino)-3-hydroxyprop-1-en-1-yl)-2-(4-hydroxy-3-methoxyphenyl)-N-(4-hydroxyphenethyl)-7-methoxy-2,3-dihydrobenzofuran-3-carbimidic acid	Alkaloids	Alkaloids
MWSmce448	Imidazol-1-yl-acetic acid	Alkaloids	Alkaloids
Hmgp002327	3-amino-2-naphthoic acid*	Alkaloids	Alkaloids
Smcp001137	naphthisoxazol A*	Alkaloids	Alkaloids
Wbjp009839	2,4-dihydroxy-5',6a,8a,9-tetramethylicosahydrospiro[naphtho[2',1':4,5]indeno[2,1-b]furan-10,2'-pyran]-8(2H)-one	Alkaloids	Alkaloids
mws0018	Spermine	Alkaloids	Alkaloids
mws0017	Spermidine	Alkaloids	Alkaloids
Zmzp005934	Stearamide	Alkaloids	Alkaloids
Hmtp000779	Lithospermoside	Alkaloids	Alkaloids
pmn001497	Dendrocrepine*	Alkaloids	Alkaloids
Qmdp090606	N-Methyltetrahydropalmatine	Alkaloids	Alkaloids
pmn001498	Isodendrocrepine*	Alkaloids	Alkaloids
MWSmce526	Daminozide	Alkaloids	Alkaloids
Wbmp002777	Delsoline	Alkaloids	Terpenoid alkaloids
MWSmce709	Isoquinoline	Alkaloids	Isoquinoline alkaloids
Wdsp002909	6-[(7-hydroxy-2-methyl-6-oxo-3,4-dihydroisoquinolin-1-yl)methyl]-2,3-dimethoxybenzoic acid	Alkaloids	Isoquinoline alkaloids
Sazp000955	Tetraphyllin A*	Alkaloids	Isoquinoline alkaloids
Sazp003832	3,4,5-trihydroxy-6-[4-[(2-hydroxybenzoyl)amino]phenoxy]oxane-2-carboxylic acid	Alkaloids	Isoquinoline alkaloids
Sazp002234	2-(hydroxymethyl)-6-[(3,9,10-trimethoxy-6,8,13,13a-tetrahydro-5H-isoquinolino[2,1-b]isoquinolin-2-yl)oxy]oxane-3,4,5-triol	Alkaloids	Isoquinoline alkaloids
Labp004779	6,7-di-O-methyl-N-deacetylisoipecosidic acid	Alkaloids	Isoquinoline alkaloids
pmb0819	3-Indoleacetonitrile	Alkaloids	Plumerane
mws0103	Indole-3-carboxaldehyde	Alkaloids	Plumerane
pmb1096	Indole*	Alkaloids	Plumerane
Hmyp002656	Methyl dioxindole-3-acetate	Alkaloids	Plumerane
Zmbp000555	3-Indole acetamide	Alkaloids	Plumerane
pme2244	3-Indolepropionic acid	Alkaloids	Plumerane
pmb0818	Methoxyindoleacetic acid	Alkaloids	Plumerane
Qmgp102418	Uncarialin J	Alkaloids	Plumerane
pme2024	Serotonin; 5-Hydroxytryptamine	Alkaloids	Plumerane
mws0005	Tryptamine	Alkaloids	Plumerane
pmb0426	N,N-Dimethyl-5-methoxytryptamine	Alkaloids	Plumerane
Zmtn001624	N-Acetylisatin	Alkaloids	Plumerane
mws0677	N-Acetyl-5-hydroxytryptamine	Alkaloids	Plumerane
mws0102	Indole-5-carboxylic acid*	Alkaloids	Plumerane
Lmtp001399	5,6-Dihydroxyindole-5-O-β-glucoside	Alkaloids	Plumerane
Zmbp002538	1-Methoxy-indole-3-acetamide	Alkaloids	Plumerane
mws1417	Indole-3-carboxylic acid*	Alkaloids	Plumerane
pme1651	Indole-3-acetic acid (IAA)	Alkaloids	Plumerane
pme2836	5-Hydroxytryptophol	Alkaloids	Plumerane
Hmmp001310	3-Indoleacrylic acid*	Alkaloids	Plumerane
Lhmp120201	5 Alpha-Carboxystrictosidine	Alkaloids	Plumerane
Lmyn002540	Dioxindole-3-acetyl-3-O-glucoside	Alkaloids	Plumerane
mws0333	5-Methoxytryptamine	Alkaloids	Plumerane
Qmgp102003	O-Acetyljervine	Alkaloids	Steroid alkaloids
Hmmp002627	α-Solasonine	Alkaloids	Steroid alkaloids
Zmrp003090	Solasodine-3-O-(2''-xyloyl)glucoside	Alkaloids	Steroid alkaloids
MWSmce352	Sipeimine	Alkaloids	Steroid alkaloids
Lmmp004445	Leptinine II	Alkaloids	Steroid alkaloids
Salp004683	etioline	Alkaloids	Steroid alkaloids
MWSmce381	Khasianine	Alkaloids	Steroid alkaloids
Salp004149	isorubijervine*	Alkaloids	Steroid alkaloids
Hmfp003206	Tomatidine-3-O-glucosyl-(1→2)-[rhamnosyl-(1→3)]glucosyl-(1→4)glucoside	Alkaloids	Steroid alkaloids
Hmfp003085	Tomatidine	Alkaloids	Steroid alkaloids
Qmgp101917	Veraflorizine	Alkaloids	Steroid alkaloids
pmp001018	Puqiedinone	Alkaloids	Steroid alkaloids
pmp000147	Pingbeimine C	Alkaloids	Steroid alkaloids
Qmgp102028	Isorubijervosine	Alkaloids	Steroid alkaloids
Lmmp003705	Leptinine I*	Alkaloids	Steroid alkaloids
Lmmp006281	Solasodiene	Alkaloids	Steroid alkaloids
Qmgp102010	6,7-Epoxyverdine	Alkaloids	Steroid alkaloids
pmp000132	Pingbeinone	Alkaloids	Steroid alkaloids
pmp001030	Yibeinoside A	Alkaloids	Steroid alkaloids
Hmfp003025	Solasodine-3-O-glucoside	Alkaloids	Steroid alkaloids
MWStz082	Edpetiline	Alkaloids	Steroid alkaloids
Hmfp003075	Tomatidine-3-O-glucoside	Alkaloids	Steroid alkaloids
Hmmp002701	β2-Solanine	Alkaloids	Steroid alkaloids
Lmfp004911	γ-Tomatine	Alkaloids	Steroid alkaloids
Lmfp004842	Tomatidinol*	Alkaloids	Steroid alkaloids
Lmmp004621	Leptinidine	Alkaloids	Steroid alkaloids
pmp001022	Tortifoline	Alkaloids	Steroid alkaloids
Qmgp101936	Veramadines A	Alkaloids	Steroid alkaloids
mws1307	α-Solanine	Alkaloids	Steroid alkaloids
Hmfp002517	Esculeogenin A-27-O-rhamnoside	Alkaloids	Steroid alkaloids
Qmgp102111	Pseudojervine	Alkaloids	Steroid alkaloids
Hmmp002720	Solanidine	Alkaloids	Steroid alkaloids
Lmfp004948	δ-Tomatine	Alkaloids	Steroid alkaloids
Lmmp003887	Solamargine*	Alkaloids	Steroid alkaloids
Wdzp006564	orientalol P	Terpenoids	Sesquiterpenoids
Zjyp102917	Nootkatol	Terpenoids	Sesquiterpenoids
Qmyp101336	JiangxiBaiyingsu I	Terpenoids	Sesquiterpenoids
Qmjp080407	14(15)-Bisnor-13-oxolabd-8(17),11(E)-dien-19-oic acid	Terpenoids	Sesquiterpenoids
Qmqp102515	Leucodin	Terpenoids	Sesquiterpenoids
Hmcp003852	Elemol	Terpenoids	Sesquiterpenoids
Qmjp080408	15-Hydroxysessilifol F	Terpenoids	Sesquiterpenoids
Lmhn010314	Aspergillusene A	Terpenoids	Sesquiterpenoids
Zjxp110301	3-Hydroxy-3,7,11-trimethyldodeca-1,6E,10-trien-9-yl isobutyrate*	Terpenoids	Sesquiterpenoids
Wdzp007343	4-epi-alismoxide	Terpenoids	Sesquiterpenoids
Lmmn006706	9α-Ethoxy-8β-(2-isobutyryloxy)-14-oxo-acanthospermolide*	Terpenoids	Sesquiterpenoids
Lmtn006254	Isabelin	Terpenoids	Sesquiterpenoids
Zjyp102913	Isocyperol	Terpenoids	Sesquiterpenoids
Lmmn007256	Hemigossypol	Terpenoids	Sesquiterpenoids
Sahp008995	Sonnerstigmane D Aglycon	Terpenoids	Sesquiterpenoids
Qmyp101401	11,12-O-Isopropyfidenesolajiangxin F	Terpenoids	Sesquiterpenoids
Yalp003517	30-Hydroxyfraxinellone	Terpenoids	Sesquiterpenoids
Lacp005602	Blumenol C malonyl Glucoside	Terpenoids	Sesquiterpenoids
Wcfp005519	5-hydroxyindene-1,3-dione	Terpenoids	Sesquiterpenoids
Hmln006735	Canusesnol J	Terpenoids	Sesquiterpenoids
Yaln008277	Trijugin A	Terpenoids	Sesquiterpenoids
Zmsn003589	Lactuside B	Terpenoids	Sesquiterpenoids
Qmyp101114	9-O-β-D-Glucoside of 3-hydroxy-7,8-didehydro-β-ionol*	Terpenoids	Sesquiterpenoids
Qmjp080402	15,16-Bisnor-13-oxo-8(17),11-labdadien-19-ol	Terpenoids	Sesquiterpenoids
Jmcn007353	1β,9β-dihydroxy-4αH-eudesmane-5,11(13)-dien-12-oic acid	Terpenoids	Sesquiterpenoids
Lacp005577	3-(3'-Hydroxybutyl)-2,4,4-trimethylcyclohexa-2,5-dienone malonyl glucoside	Terpenoids	Sesquiterpenoids
Wcfp003211	1,1'-(6-hydroxy-2,3-dihydro-1H-indene-2,5-diyl)bis(ethan-1-one)	Terpenoids	Sesquiterpenoids
MWS1962	cis-Citral	Terpenoids	Monoterpenoids
Lhlp120627	Carvylacetate	Terpenoids	Monoterpenoids
Zbzp003763	11-methoxy viburtinal	Terpenoids	Monoterpenoids
Yajn002747	Posoquenin	Terpenoids	Monoterpenoids
Lmdn001560	6-DeoxyCatalpol	Terpenoids	Monoterpenoids
Hmlp008487	Blumenol C	Terpenoids	Monoterpenoids
Saln004300	methyl (2S,3R,4S)-3-ethenyl-4-[2-[(E)-3-(4-hydroxy-3-methoxyphenyl)prop-2-enoyl]oxyethyl]-2-[(2S,3R,4S,5S,6R)-3,4,5-trihydroxy-6-(hydroxymethyl)oxan-2-yl]oxy-3,4-dihydro-2H-pyran-5-carboxylate	Terpenoids	Monoterpenoids
Labp007448	4,5-Dihydrovmifoliol	Terpenoids	Monoterpenoids
Saln000462	7-O-coumaroyl-loganic acid	Terpenoids	Monoterpenoids
Yajn003045	Ebuloside	Terpenoids	Monoterpenoids
Saln004708	1-O-Glucopyranosylamplexine	Terpenoids	Monoterpenoids
Wbmn004320	6'-O-p-hydroxybenzoylmussaenosidicacid	Terpenoids	Monoterpenoids
Saln003581	6'-O-β-D-Glucopyranosyl Swertiamarin	Terpenoids	Monoterpenoids
Yajn003986	Dihydropenstemide	Terpenoids	Monoterpenoids
Smnn005560	Oleuropein	Terpenoids	Monoterpenoids
Xmsn004568	Mudanpioside F	Terpenoids	Monoterpenoids
Ymjm000127	10-Acetylpatrinoside	Terpenoids	Monoterpenoids
Lmjn003979	Catalposide*	Terpenoids	Monoterpenoids
Lmjn004153	6'-O-p-Hydroxybenzoylcatalpol*	Terpenoids	Monoterpenoids
Saln000499	7-O-(4''-O-glucosyl)coumaroyl-loganic acid	Terpenoids	Monoterpenoids
Qmxn081804	Pharicinin B	Terpenoids	Ditepenoids
Wbmp007921	Vitexlimolide A	Terpenoids	Ditepenoids
Lhyn080408	15-Epi-leosibirone B	Terpenoids	Ditepenoids
Wbmn011269	Vitexilactone*	Terpenoids	Ditepenoids
Wbkn005292	[(1S,2S,3S,7R,9R,13S,14R,15R,17S)-3,15-diacetyloxy-7-hydroxy-2,6,14-trimethyl-4,11,16-trioxo-10-oxatetracyclo[7.7.1.02,7.013,17]heptadec-5-en-17-yl]methylacetate*	Terpenoids	Ditepenoids
Hmqp006656	12-Hydroxyhydromethylabietate	Terpenoids	Ditepenoids
Wcgp009524	Kaurane-16,17-diol	Terpenoids	Ditepenoids
Zaxn005783	Methyl neoabietate*	Terpenoids	Ditepenoids
Wbmp010456	Macrophypene B*	Terpenoids	Ditepenoids
Sayp010368	phyllanflexoid A	Terpenoids	Ditepenoids
Wbmn010531	Previtexilactone	Terpenoids	Ditepenoids
Cmmn013378	Levopimaric acid*	Terpenoids	Ditepenoids
Wmsn000915	teufruintin B	Terpenoids	Ditepenoids
Zaxn005611	Methyl abieta*	Terpenoids	Ditepenoids
MWSslk208	Kaurenoic Acid*	Terpenoids	Ditepenoids
Yhhn011469	hemerocallal A	Terpenoids	Ditepenoids
Qmxp101615	Ent-3β-Acetoxyisopimar-15-8β-ol	Terpenoids	Ditepenoids
Wbmn010746	Negundoin A*	Terpenoids	Ditepenoids
Lmbn014696	Pimaric acid*	Terpenoids	Ditepenoids
Qmxn081806	Nervonin J	Terpenoids	Ditepenoids
Lmmn004459	Ent-15-oxo-2β,16,19-trihydroxypimar-8(14)-ene	Terpenoids	Ditepenoids
Yshs000041	Vibsanin J	Terpenoids	Ditepenoids
Lmmn006246	7β-Hydroxydarutigenol	Terpenoids	Ditepenoids
Lasp010382	Ent-16beta-Methoxy-19-Kauranoic Acid	Terpenoids	Ditepenoids
Wbkn004126	Javanicolide C*	Terpenoids	Ditepenoids
Wmbp000583	Ajugalide D	Terpenoids	Ditepenoids
Cmmn012997	Abietic acid*	Terpenoids	Ditepenoids
pmf0314	cis-Abienol	Terpenoids	Ditepenoids
Zaxn005652	Pisiferic acid	Terpenoids	Ditepenoids
Cmmn013275	Isopimaric acid*	Terpenoids	Ditepenoids
Lhyp112511	Rumphioside B*	Terpenoids	Ditepenoids
MWSprf119	3-acetylursolic acid	Terpenoids	Triterpene
Wmhp000032	2,3,6,23-Tetrahydroxyolean-12-en-28-oic acid (Protobassic acid)	Terpenoids	Triterpene
Lmmn009932	3-Hydroxy-24-methylene-9,19-cyclolanostan-26-oic acid (Ambolic acid)	Terpenoids	Triterpene
Cmmp006152	Norarjunolic acid	Terpenoids	Triterpene
Lmmn008971	3-Hydroxycycloarta-24-ene-26-oic acid (Isomangiferolic acid)*	Terpenoids	Triterpene
Yalp008917	(3R,5R,7R,8R,10S,13S,17R)-17-((S)-7,7-dimethyl-2,3,6,7-tetrahydrooxepin-3-yl)-4,4,8,10,13-pentamethyl-2,3,4,5,6,7,8,9,10,11,12,13,16,17-tetradecahydro-1H-cyclopenta[a]phenanthrene-3,7-diyl diacetate	Terpenoids	Triterpene
pmn001700	24,30-Dihydroxy-12(13)-ene-lupeol*	Terpenoids	Triterpene
MWSmce406	16-Hydroxy-24-methylene-3-oxolanosta-7,9(11)-diene-21-oic acid (Polyporenic acid C)	Terpenoids	Triterpene
HJN110	3-Hydroxylup-20(29)-en-28-oic acid (Betulinic acid)*	Terpenoids	Triterpene
Hmdn006566	3,4-Open loop-lupine-4(23),20(29)-diene-24-hydroxy-3-carboxylic acid*	Terpenoids	Triterpene
Hmdn006685	3,4-Cycloopen-cycloaltin-4(29),25-diene-24(S)-hydroxy-3-carboxylic acid*	Terpenoids	Triterpene
Lmdn006811	3,24-Dihydroxyolean-12-en-22-one (Soyasapogenol E)*	Terpenoids	Triterpene
mws4053	3-Hydroxyurs-12-en-28-oic acid (Ursolic acid)*	Terpenoids	Triterpene
Zbsn012366	Oxyallobetulin*	Terpenoids	Triterpene
Hmsn002719	Esculentoside E	Terpenoids	Triterpene Saponin
Wbmn008725	methyl (2S,3S,4S,5R,6R)-6-[[(3S,4R,4aR,6aR,6bS,8aS,12aS,14aR,14bR)-4-(hydroxymethyl)-8a-methoxycarbonyl-4,6a,6b,11,11,14b-hexamethyl-1,2,3,4a,5,6,7,8,9,10,12,12a,14,14a-tetradecahydropicen-3-yl]oxy]-3,4-dihydroxy-5-[(2S,3R,4S,5R,6R)-3,4,5-trihydroxy-6-(hydroxymethyl)oxan-2-yl]oxyoxane-2-carboxylate	Terpenoids	Triterpene Saponin
Lmxn004090	6''-O-Caffeoylharpagide	Terpenoids	Terpene
Wbhp008502	Tagalsin Q	Terpenoids	Terpene
HX1288	Citroside A*	Terpenoids	Terpene
Wbhp009564	Methyl 8,9-epoxypimaran-18-oate	Terpenoids	Terpene
Cmyp003257	Icariside B1	Terpenoids	Terpene
Wbhp007378	[6-[acetyloxy-[1-(furan-3-yl)-5-hydroxy-8a-methyl-3,6-dioxo-7,8-dihydro-1H-isochromen-5-yl]methyl]-3-(2-methoxy-2-oxoethyl)-2,2,4-trimethyl-5-oxocyclohexyl]2-methylbutanoate	Terpenoids	Terpene
Yxxn004456	pinnatasterone	Terpenoids	Terpene
MW0121650	5-Methyltetrahydrofolic acid	Organic acids	Organic acids
pme3011	γ-Aminobutyric acid	Organic acids	Organic acids
Zmtn001464	4,8-Dihydroxyquinoline-2-carboxylic acid	Organic acids	Organic acids
Lmyp003934	Anacardic acid	Organic acids	Organic acids
mws0277	Quinic Acid	Organic acids	Organic acids
Hmqp004104	Pharbinilic Acid	Organic acids	Organic acids
mws0567	4-Guanidinobutyric acid	Organic acids	Organic acids
Lmbn001364	4-Hydroxy-2-Oxopentanoic Acid	Organic acids	Organic acids
Sazp003601	Tuberonic acid glucoside*	Organic acids	Organic acids
MW0014506	4-Hydroxyretinoic acid	Organic acids	Organic acids
mws4052	1-Aminocyclopropane-1-carboxylic acid*	Organic acids	Organic acids
Lmtn004049	Abscisic acid	Organic acids	Organic acids
mws2628	N-Methyl-4-aminobutyric acid	Organic acids	Organic acids
Lmgn002091	2-Methyl-3-oxoadipic acid*	Organic acids	Organic acids
Lmbn001467	5-Acetamidopentanoic Acid	Organic acids	Organic acids
mws0159	Phenylpyruvic acid	Organic acids	Organic acids
Lmgn007652	Tianshic acid	Organic acids	Organic acids
Hmhn002738	3-Furoic acid	Organic acids	Organic acids
pme0266	Sebacic acid	Organic acids	Organic acids
pmf0096	Oxalic acid	Organic acids	Organic acids
Lmbn001288	2-Hydroxy-2-methyl-3-oxobutanoic acid	Organic acids	Organic acids
Lmmn003323	2-Hydroxyhexadecanoic acid*	Organic acids	Organic acids
MWSslk154	Triethyl citrate	Organic acids	Organic acids
Lcsn000415	Keto-Deoxy-Nonulonic acid	Organic acids	Organic acids
Zmdp000917	δ-Guanidinovaleric acid	Organic acids	Organic acids
pme3096	Aminomalonic acid	Organic acids	Organic acids
Zbqp000579	2-amino-3-(1H-pyrazol-1-yl)propanoic acid*	Organic acids	Organic acids
mws2125	Phosphoenolpyruvate	Organic acids	Organic acids
Zmgn001448	2-Propylmalic Acid*	Organic acids	Organic acids
Lmbn001754	3-Isopropylmalic Acid*	Organic acids	Organic acids
MW0106444	Dihydrofolic acid	Organic acids	Organic acids
WaYn000716	Citric Acid diglucoside	Organic acids	Organic acids
Zmyn000247	2-Hydroxyglutaric Acid*	Organic acids	Organic acids
mws0242	Suberic Acid	Organic acids	Organic acids
Zmjp003163	Jasmonic acid	Organic acids	Organic acids
mws0154	Shikimic acid	Organic acids	Organic acids
pme3207	Muconic acid	Organic acids	Organic acids
mws0281	Citric Acid	Organic acids	Organic acids
Lmgn002184	2-Oxoheptanedionic acid*	Organic acids	Organic acids
pme1936	Creatinine	Organic acids	Organic acids
mws0924	2-Methylglutaric acid*	Organic acids	Organic acids
mws0208	Adipic Acid*	Organic acids	Organic acids
pme2550	Cis-Aconitic acid	Organic acids	Organic acids
MWS1709	D-Malic acid*	Organic acids	Organic acids
MWS1837	Tranexamic Acid	Organic acids	Organic acids
Zmgn000217	Itaconic acid	Organic acids	Organic acids
Lmyn002403	Mandelic acid-β-glucoside	Organic acids	Organic acids
MW0126147	Pinolidoxin	Organic acids	Organic acids
ML10176345	3-Dehydroshikimic acid	Organic acids	Organic acids
pme3017	2-Aminoisobutyric acid*	Organic acids	Organic acids
Lmbn003524	9-Oxononanoic acid	Organic acids	Organic acids
MW0113143	4-O-beta-D-glucosyl-4-coumaric acid*	Organic acids	Organic acids
MWS0274	DL-3-Phenyllactic acid*	Organic acids	Organic acids
pme1216	2-Picolinic acid	Organic acids	Organic acids
mws0236	2-Aminoethanesulfonic acid	Organic acids	Organic acids
Lmsn015919	Phytic acid	Organic acids	Organic acids
pmb2657	Argininosuccinic acid	Organic acids	Organic acids
Lmgn000224	2-Methyl-3-oxosuccinic acid	Organic acids	Organic acids
MWS2040	Methanesulfonic acid	Organic acids	Organic acids
mws0341	2-Hydroxyisocaproic acid	Organic acids	Organic acids
Rfmb320	1-Methylpiperidine-2-carboxylic acid	Organic acids	Organic acids
Lmgn000160	3-Ureidopropionic Acid	Organic acids	Organic acids
Wmzn000227	2,2-Dimethylsuccinic acid	Organic acids	Organic acids
pmb2826	L-Citramalic acid	Organic acids	Organic acids
Zmpn000638	3-Guanidinopropionic acid	Organic acids	Organic acids
pmb3101	2-Isopropylmalic Acid	Organic acids	Organic acids
ML10197929	Creatine	Organic acids	Organic acids
Zmyn000453	Isocitric Acid	Organic acids	Organic acids
pme2380	α-Ketoglutaric acid	Organic acids	Organic acids
MWS0205	Allantoin	Organic acids	Organic acids
Zmgn000216	2-Hydroxyethylphosphonic acid	Organic acids	Organic acids
pme0278	2,6-Diaminooimelic acid	Organic acids	Organic acids
MWS1798	2,4-Hexadienoic acid	Organic acids	Organic acids
pme0120	5-Aminovaleric acid	Organic acids	Organic acids
Zmjn001813	Pimelic acid*	Organic acids	Organic acids
mws0192	Succinic acid*	Organic acids	Organic acids
mws0470	Methylmalonic acid*	Organic acids	Organic acids
pme0274	6-Aminocaproic acid	Organic acids	Organic acids
Lmbn002072	2-Propylsuccinic acid*	Organic acids	Organic acids
mws0237	Azelaic acid	Organic acids	Organic acids
mws0336	Urocanic acid	Organic acids	Organic acids
pme3186	DL-Glyceraldehyde-3-phosphate	Organic acids	Organic acids
mws0576	3-Hydroxybutyric acid	Organic acids	Organic acids
mws0147	β-Hydroxyisovaleric acid	Organic acids	Organic acids
mws0376	Fumaric acid	Organic acids	Organic acids
Lmbn001676	3-Hydroxy-3-Methyl-2-Oxopentanoic Acid	Organic acids	Organic acids
mws0267	DL-Glyceric Acid	Organic acids	Organic acids
pme1730	D-Erythronolactone	Organic acids	Organic acids
Wayn000884	Citric acid glucoside	Organic acids	Organic acids
ML10172161	Hydroxypyruvic acid	Organic acids	Organic acids
Ysjn001064	3-Oxopentanedioic acid	Organic acids	Organic acids
pme0048	2-Aminoethanesulfinic acid	Organic acids	Organic acids
MWS5238	4-Phenylbutyric acid	Organic acids	Organic acids
MWS3036	3-Hydroxyglutaric acid*	Organic acids	Organic acids
MWS0811	L-Pipecolic Acid*	Organic acids	Organic acids
Lmgn000219	Succinic semialdehyde	Organic acids	Organic acids
Lmgn000188	D-Lactic Acid	Organic acids	Organic acids
pme3154	Mevalonic acid	Organic acids	Organic acids
mws0425	Citraconic acid	Organic acids	Organic acids
Lhmp122112	5-Pregnene-3,17,20-triol-20-O-glucoside*	Steroids	Cardiac glycoside
Zmcp010827	Spirost-5-en-3-ol (Diosgenin)*	Steroids	Steroid
Lskp211409	Ergosta-5,24(28)-diene-3,20,26-triol (Podecdysone C)	Steroids	Steroid
Lskp211410	1,2,3,14,20,22,25-Heptahydroxycholest-7-en-6-one (Integristerone A)	Steroids	Steroid
Zjhp082604	Diosgenin*	Steroids	Steroid
zjbp120109	Spirost-4-en-3-one (Diosgenone)	Steroids	Steroid
Lskp211411	abutasterone*	Steroids	Steroid
Zjhp082614	iso-Diosgenin-Glc	Steroids	Steroidal saponins
Wdbn009958	21-hydroperoxy-8-hydroxy-5,19-dimethyl-15,18,20-trioxapentacyclo[14.5.1.04,13.05,10.019,22]docosa-1,10-dien-14-one*	Steroids	Steroidal saponins
Zjhp082640	Yamogenin-Glc-Glc-Rha*	Steroids	Steroidal saponins
Zjbp081703	3-hydroxy-5,20-diene-26 furostanol-Glc	Steroids	Steroidal saponins
Zjmp101909	isodiosgenin-Glc-Glc	Steroids	Steroidal saponins
Zjhp082628	Diosgenin-Gal-Glc	Steroids	Steroidal saponins
Zjhp082615	iso-Diosgenin-Gal	Steroids	Steroidal saponins
Cmlp005341	Furost-5,20-dien-3,26-diol-3-O-rhamnosyl(1→2)[rhamnosyl(1→4)]glucoside-26-O-glucoside (Pseudoprotodioscin)*	Steroids	Steroidal saponins
Zjhp082613	Diosgenin-Glc	Steroids	Steroidal saponins
Zmsp004864	β-Solamarine	Steroids	Steroidal saponins
Zjcp102009	Diosgenin-Glc-Glc-Rha-Rha*	Steroids	Steroidal saponins
Zjzp081813	Timosaponin A	Steroids	Steroidal saponins
Qahp006824	Periseoside B	Steroids	Steroidal saponins
Wacp004383	Dehydroxylcryptogenin glu rha rha glu*	Steroids	Steroidal saponins
zjbp120108	5(6)-En-spirost-3-ol-3-O-glucosyl-(1→4)-[rhamnosyl-(1→2)]-galactoside*	Steroids	Steroidal saponins
Zmcp005801	Diosgenin-3-O-glucosyl(1→4)rhamnosyl(1→4)rhamnosyl(1→2)glucoside*	Steroids	Steroidal saponins
Zjhp082626	Yamogenin-Glc-Glc*	Steroids	Steroidal saponins
Wajp005655	23-Methylspirosta-5-Ene-3beta-Ol 3-O-glucosyl-rhamnosyl-rhamnosyl-glucoside	Steroids	Steroidal saponins
Jmyp004441	3-O-Glucosyl-(1→2)-[xylosyl-(1→3)]-glucosyl-(1→4)-galactoside-yamogenin*	Steroids	Steroidal saponins
Jmyp004233	Spirost-5-en-3-ol-3-O-glucosyl(1→4)galactoside*	Steroids	Steroidal saponins
Lazp008807	(25S)-5β-Furost-1β,2β,3β,4β,5β,22α,26-heptaol-26-O-β-D-glucoside	Steroids	Steroidal saponins
Latp005116	(25R)-26-O-β-D-Glucopyranosyl-furost-5,20-diene-3β,26-diol-3-O-[α-L-rhamnopyranosylAcetyl-(1-2)]-[α-L-rhamnopyranosyl-(1-4)]-β-D-glucopyranoside*	Steroids	Steroidal saponins
pmp000753	Diosgenin-3-O-rhamnosyl(1→2)glucoside	Steroids	Steroidal saponins
Hmqp005575	3-O-{rhamnosyl(1→2)-[glucosyl(1→3)]-galactosyl}nuatigenin 26-O-glucoside (Aculeatiside A)*	Steroids	Steroidal saponins
mws1365	Furost-5-en-3,22,26-triol-3-O-rhamnosyl(1→2)[rhamnosyl(1→4)]glucoside-26-O-glucoside (Protodioscin)	Steroids	Steroidal saponins
Hmdp003401	Trillin-6'-O-glucoside*	Steroids	Steroidal saponins
Zjbp081711	3-Hydroxyspirost-6-one-3-O-rhamnosyl-(1→2)-glucoside*	Steroids	Steroidal saponins
Lmhp011562	1-α-Linolenoyl-glycerol*	Lipids	Glycerol ester
Lmfp009701	Glycerol 9(E),11(Z),13(E)-octadecatrienoyl ester*	Lipids	Glycerol ester
pmb1562	1-Stearidonoyl-Glycerol	Lipids	Glycerol ester
Lmhp112042	1-Linoleoylglycerol*	Lipids	Glycerol ester
Wasn014341	LysoPA(18:3(9Z,12Z,15Z)/0:0)	Lipids	Glycerol ester
Lmsp010763	Monolinolenin*	Lipids	Glycerol ester
Lmhp011388	2-α-Linolenoyl-glycerol*	Lipids	Glycerol ester
Hmyn007168	LysoPG 16:0	Lipids	Glycerol ester
MWSmce549	1-Monomyristin	Lipids	Glycerol ester
Lmxp010913	1-(9Z-Octadecenoyl)-2-(9-oxo-nonanoyl)-sn-glycero-3-phosphocholine	Lipids	Glycerol ester
Lmyn006011	Gingerglycolipid B	Lipids	Glycerol ester
Lmqn008369	PI(18:2/0:0)	Lipids	Glycerol ester
Wagn012030	2-Palmitoyl-Sn-Glycerol 3-O-Diglucoside	Lipids	Glycerol ester
Lmqn008975	PA(18:2/0:0)	Lipids	Glycerol ester
Lmqn009065	PA(18:1/0:0)	Lipids	Glycerol ester
Zbfn007626	1-Linoleoyl-2-Lysophosphatidic Acid Monobutylamine Ester	Lipids	Glycerol ester
pmb0296	1-Oleoyl-Sn-Glycerol	Lipids	Glycerol ester
pmd0157	LysoPG 18:1	Lipids	Glycerol ester
Wagn011658	1-Palmitoyl-Sn-Glycerol 3-O-Diglucoside	Lipids	Glycerol ester
Lmyn005812	Gingerglycolipid A	Lipids	Glycerol ester
Lmyn006221	Gingerglycolipid C	Lipids	Glycerol ester
Zbfn008434	1-O-Linoleoyl-3-O-galactopyranosyl-L-glycerol	Lipids	Glycerol ester
Lmhp012042	2-Linoleoylglycerol*	Lipids	Glycerol ester
pmd0155	LysoPA 18:0	Lipids	Glycerol ester
Lmhp008513	2-α-Linolenoyl-glycerol-1,3-di-O-glucoside	Lipids	Glycerol ester
mws0120	Choline Alfoscerate	Lipids	PC
Walp007190	2-AminoicoSane-1,5,7,19-tetraol	Lipids	Sphingolipids
Walp007214	2-Aminohexadecane-1,5,6-triol	Lipids	Sphingolipids
Walp008102	2-Aminooctadecane-1,4-diol	Lipids	Sphingolipids
Walp008158	2-AminoicoSane-1,5,19-triol	Lipids	Sphingolipids
Walp006011	2-Aminotetradecane-1,4-diol*	Lipids	Sphingolipids
pmb2221	4-Hydroxysphinganine; Phytosphingosine	Lipids	Sphingolipids
Walp007738	14-Amino-15-hydroxy-11-methylpentadecanoic acid	Lipids	Sphingolipids
WaYp006462	2-Aminohexadecane-1,5,15-triol	Lipids	Sphingolipids
WaYp007721	2-Aminohexadecane-1,16,16-triol	Lipids	Sphingolipids
Walp007182	2-Aminohexadecane-1,15-diol*	Lipids	Sphingolipids
Walp004906	2-Aminotetradecane-1,11,13-triol	Lipids	Sphingolipids
pmp001264	Hexadecylsphingosine	Lipids	Sphingolipids
Walp008255	2-aminodocoSane-1,5,7,21-tetraol	Lipids	Sphingolipids
WaYp007548	2-Aminotetradecan-1-ol*	Lipids	Sphingolipids
WaYp007695	2-Aminooctadecane-1,16,18,18-tetraol	Lipids	Sphingolipids
Walp007192	2-aminodocoSane-1,6,19,20,21-pentaol	Lipids	Sphingolipids
Walp007137	2-AminoicoSane-1,6,18,19,20-pentaol	Lipids	Sphingolipids
Walp007188	2-Aminooctadecane-1,5,7,17-tetraol	Lipids	Sphingolipids
WaYp005128	2-Aminotetradecane-1,5,13-triol	Lipids	Sphingolipids
Walp007095	2-Amino-7-methyltridecan-1-ol*	Lipids	Sphingolipids
ML10195036	3-Dehydrosphinganine	Lipids	Sphingolipids
Walp006175	2-Aminotetradecane-1,5,11-triol	Lipids	Sphingolipids
Walp004752	2-Aminododecane-1,4-diol	Lipids	Sphingolipids
Walp007043	2-Aminohexadecane-1,4-diol*	Lipids	Sphingolipids
MWS0946	Sphingosine-1-Phosphate	Lipids	Sphingolipids
MWS0952	Dihydrosphingosine-1-Phosphate	Lipids	Sphingolipids
Walp004995	2-Aminododecane-1,3,4-triol	Lipids	Sphingolipids
MEDP1345	LysoPC(18:3(9Z,12Z,15Z))	Lipids	LPC
pmb2406	LysoPC 17:0*	Lipids	LPC
pmp001251	LysoPC 18:2(2n isomer)*	Lipids	LPC
pmb0854	LysoPC 18:3*	Lipids	LPC
MW0016024	Azelaoyl PAF	Lipids	LPC
MW0054970	MG(0:0/18:2(9Z,12Z)/0:0)	Lipids	LPC
Lmhp009129	LysoPC 15:0(2n isomer)*	Lipids	LPC
Lmhp009590	LysoPC 17:1	Lipids	LPC
pmb2165	LysoPC 10:0	Lipids	LPC
Lmhp009890	LysoPC 20:3	Lipids	LPC
Lmhp008924	LysoPC 19:3	Lipids	LPC
Lmhp010515	LysoPC 17:0(2n isomer)*	Lipids	LPC
pmd0146	LysoPC 20:2(2n isomer)*	Lipids	LPC
pmb0865	LysoPC 18:3(2n isomer)*	Lipids	LPC
Lmhp010908	LysoPC 19:1	Lipids	LPC
Hmqp006235	LysoPC 18:4	Lipids	LPC
pma1303	LysoPC 16:2*	Lipids	LPC
Lmhp010190	LysoPC 18:1(2n isomer)	Lipids	LPC
Lmhp008833	LysoPC 16:1(2n isomer)*	Lipids	LPC
MW0141803	1-O-(cis-9-Octadecenyl)-2-O-acetyl-sn-glycero-3-phosphocholine	Lipids	LPC
pmp001270	LysoPC 16:1*	Lipids	LPC
pmb2319	LysoPC 15:0*	Lipids	LPC
pmp001273	LysoPC 18:2	Lipids	LPC
pmd0130	LysoPC 14:0	Lipids	LPC
pmd0147	LysoPC 20:2*	Lipids	LPC
pmb0863	LysoPC 16:2(2n isomer)*	Lipids	LPC
Lmhp011549	LysoPC 20:1	Lipids	LPC
pmb2260	LysoPC 15:1	Lipids	LPC
Lmhp008718	LysoPC 17:2	Lipids	LPC
Lmhp007840	LysoPC 19:2*	Lipids	LPC
Wcdp007360	LysoPC 16:0*	Lipids	LPC
mws0126	LysoPC 18:0	Lipids	LPC
MW0058181	1-(9Z-heptadecenoyl)-sn-glycero-3-phosphoethanolamine*	Lipids	LPC
Lmhp007598	LysoPC 19:2(2n isomer)*	Lipids	LPC
MW0058413	1-(9Z-nonadecenoyl)-glycero-3-phosphoethanolamine	Lipids	LPC
pmb2228	LysoPC 19:0	Lipids	LPC
pmd0136	LysoPC 18:0(2n isomer)	Lipids	LPC
pmd0132	LysoPC 16:0(2n isomer)*	Lipids	LPC
MEDL00392	1-(9Z-octadecenoyl)-sn-glycero-3-phosphocholine	Lipids	LPC
Lmhp009187	LysoPE 15:0*	Lipids	LPE
pmb0876	LysoPE 16:0*	Lipids	LPE
Lmhp008589	LysoPE 18:3(2n isomer)*	Lipids	LPE
Lmhp009769	LysoPE 17:1*	Lipids	LPE
pmb0881	LysoPE 18:2*	Lipids	LPE
Lmhp008273	LysoPE 15:1(2n isomer)*	Lipids	LPE
Waln011222	2-(2,3-dihydroxypropoxy)-3-(((2-(dimethylamino)ethoxy)(hydroxy)phosphoryl)oxy)propyl palmitate*	Lipids	LPE
Lmhp008801	LysoPE 18:3*	Lipids	LPE
WaYn011395	2-(2,3-dihydroxypropoxy)-3-(((2-(dimethylamino)ethoxy)(hydroxy)phosphoryl)oxy)propan-2-yl (Z)-14-Octadecenoic Acid	Lipids	LPE
Lmhp010040	LysoPE 20:3*	Lipids	LPE
Lmhp009802	LysoPE 20:3(2n isomer)*	Lipids	LPE
pmb0864	LysoPE 14:0*	Lipids	LPE
Waln011704	1-(2,3-dihydroxypropoxy)-3-(((2-(dimethylamino)ethoxy)(hydroxy)phosphoryl)oxy)propan-2-yl (Z)-14-Octadecenoic Acid	Lipids	LPE
Lmhp007836	LysoPE 16:3	Lipids	LPE
Lmhp008885	LysoPE 15:0(2n isomer)*	Lipids	LPE
Lmhp009497	LysoPE 20:4*	Lipids	LPE
Waln009920	1-(2,3-dihydroxypropoxy)-3-(((2-(dimethylamino)ethoxy)(hydroxy)phosphoryl)oxy)propan-2-yl (8E,11Z,14Z)-octadeca-8,11,14-trienoate*	Lipids	LPE
pmb0880	LysoPE 18:0(2n isomer)	Lipids	LPE
mws0289	LysoPE 18:1*	Lipids	LPE
Waln010743	1-(2,3-dihydroxypropoxy)-3-(((2-(dimethylamino)ethoxy)(hydroxy)phosphoryl)oxy)propan-2-yl (11Z,14Z)-octadeca-11,14-dienoate*	Lipids	LPE
Lmhp010757	LysoPE 20:2*	Lipids	LPE
Lmhp008233	LysoPE 18:4	Lipids	LPE
Lmhp008688	LysoPE 20:5	Lipids	LPE
Lmhp009349	LysoPE 20:4(2n isomer)*	Lipids	LPE
pmd0160	LysoPE 16:0(2n isomer)*	Lipids	LPE
pmb0874	LysoPE 18:2(2n isomer)*	Lipids	LPE
Lmhp008440	LysoPE 15:1*	Lipids	LPE
Lmhp008337	LysoPE 14:0(2n isomer)*	Lipids	LPE
pmb0883	LysoPE 18:0	Lipids	LPE
Waln011009	2-(2,3-dihydroxypropoxy)-3-(((2-(dimethylamino)ethoxy)(hydroxy)phosphoryl)oxy)propyl (11Z,14Z)-octadeca-11,14-dienoate*	Lipids	LPE
Waln011524	1-(2,3-dihydroxypropoxy)-3-(((2-(dimethylamino)ethoxy)(hydroxy)phosphoryl)oxy)propan-2-yl palmitate*	Lipids	LPE
Waln010192	2-(2,3-dihydroxypropoxy)-3-(((2-(dimethylamino)ethoxy)(hydroxy)phosphoryl)oxy)propyl (8E,11Z,14Z)-octadeca-8,11,14-trienoate*	Lipids	LPE
Lmhp009464	LysoPE 17:1(2n isomer)*	Lipids	LPE
WaYn011606	1-(2,3-dihydroxypropoxy)-3-(((2-(dimethylamino)ethoxy)(hydroxy)phosphoryl)oxy)propan-2-yl heptadecanoate	Lipids	LPE
pmb0856	LysoPE 18:1(2n isomer)*	Lipids	LPE
Lmhp009034	LysoPE 16:1*	Lipids	LPE
Lmhp008763	LysoPE 16:1(2n isomer)*	Lipids	LPE
Waln010449	1-(2,3-dihydroxypropoxy)-3-(((2-(dimethylamino)ethoxy)(hydroxy)phosphoryl)oxy)propan-2-yl (E)-hexadec-9-enoate	Lipids	LPE
Lmhp010514	LysoPE 20:2(2n isomer)*	Lipids	LPE
Lmhp010162	LysoPE 17:0	Lipids	LPE
Zmyn004449	9-Hydroxy-12-oxo-10(E),15(Z)-octadecadienoic acid	Lipids	Free fatty acids
Yalp008047	Methyl 12-phenyldodecanoate	Lipids	Free fatty acids
Lmbn003970	9,12,13-TriHOME; 9(S),12(S),13(S)-Trihydroxy-10(E)-octadecenoic acid	Lipids	Free fatty acids
MW0169676	Pinolenic acid	Lipids	Free fatty acids
pmb2791	9-Hydroperoxy-10E,12,15Z-octadecatrienoic acid	Lipids	Free fatty acids
Zmyn005252	3-Hydroxy-palmitic acid methyl ester	Lipids	Free fatty acids
Hmqn003054	9,10,11-Trihydroxy-12-octadecenoic acid	Lipids	Free fatty acids
MW0168670	9,12-Octadecadiynoic Acid	Lipids	Free fatty acids
mws0367	α-Linolenic Acid*	Lipids	Free fatty acids
pmf0397	Arachidic acid	Lipids	Free fatty acids
MWS80006	9-Hydroperoxy-9Z,11E-Octadecadienoic Acid	Lipids	Free fatty acids
Lmbn004240	9,10-Dihydroxy-12,13-epoxyoctadecanoic acid	Lipids	Free fatty acids
Zmyn004676	17-Hydroxylinolenic acid	Lipids	Free fatty acids
mws0371	Cis-4,7,10,13,16,19-Docosahexaenoic Acid	Lipids	Free fatty acids
Lmbn009444	Ricinoleic acid	Lipids	Free fatty acids
Rfmb091	9S-Hydroxy-10E,12Z-octadecadienoic acid*	Lipids	Free fatty acids
pmb2799	12,13-Epoxy-9-Octadecenoic Acid	Lipids	Free fatty acids
Lmmn004951	2-Hydroxy-4-methyl-3-undecanoyloxypentanoic acid methyl ester*	Lipids	Free fatty acids
Lmln007483	Sanleng acid*	Lipids	Free fatty acids
pme2827	Palmitaldehyde	Lipids	Free fatty acids
Lmbn005662	9(10)-EpOME;(9R,10S)-(12Z)-9,10-Epoxyoctadecenoic acid	Lipids	Free fatty acids
pmn001691	9,12,13-Trihydroxy-10,15-octadecadienoic acid	Lipids	Free fatty acids
Zmyn004732	2R-hydroxy-9Z,12Z,15Z-octadecatrienoic acid	Lipids	Free fatty acids
pma0461	14,15-Dehydrocrepenynic acid*	Lipids	Free fatty acids
pmb2789	13S-Hydroperoxy-6Z,9Z,11E-octadecatrienoic acid	Lipids	Free fatty acids
mws0752	Undecylic Acid	Lipids	Free fatty acids
WaYn010298	9-Hydroxyoctadeca-6,10,12,15-Tetraenoic Acid	Lipids	Free fatty acids
Lmyn011997	Erucic acid	Lipids	Free fatty acids
Lmbn005923	Crepenynic acid*	Lipids	Free fatty acids
YC512117	Stearidonic acid	Lipids	Free fatty acids
Lmbn005369	13(S)-HODE;13(S)-Hydroxyoctadeca-9Z,11E-dienoic acid	Lipids	Free fatty acids
Rfmb087	9-Hydroxy-13-oxo-10-octadecenoic Acid	Lipids	Free fatty acids
mws0131	Phytol	Lipids	Free fatty acids
pmn001689	9-Hydroxy-12-oxo-15(Z)-octadecenoic acid	Lipids	Free fatty acids
YC512118	Oleamide (9-Octadecenamide)	Lipids	Free fatty acids
Lmbn006152	(9Z,11E)-Octadecadienoic acid*	Lipids	Free fatty acids
mws1491	Linoleic acid*	Lipids	Free fatty acids
Wcdp006869	10-Methoxyheptadec-1-En-4,6-Diyne-3,9-Diol	Lipids	Free fatty acids
Lmqn008288	3-Hydroxyoctadecanoic Acid	Lipids	Free fatty acids
Wafn011571	alpha-Hydroxylinoleic acid*	Lipids	Free fatty acids
Zmyn004548	12-Oxo-phytodienoic acid	Lipids	Free fatty acids
MWS5231	Tridecanedioic acid	Lipids	Free fatty acids
mws0366	γ-Linolenic Acid*	Lipids	Free fatty acids
MWS1900	Undecanedioic acid	Lipids	Free fatty acids
Lmbn004685	5S,8R-DiHODE; (5S,8R,9Z,12Z)-5,8-Dihydroxyoctadeca-9,12-dienoate	Lipids	Free fatty acids
MWS2430	13-methylmyristic acid	Lipids	Free fatty acids
MWS2673	5,6-DiHETrE[(±)5,6-dihydroxy-8Z,11Z,14Z-eicosatrienoic acid]	Lipids	Free fatty acids
mws1488	Palmitic acid	Lipids	Free fatty acids
Lmbn007891	Hydroxy ricinoleic acid	Lipids	Free fatty acids
pmn001694	9,10,13-Trihydroxy-11-Octadecenoic Acid	Lipids	Free fatty acids
pmb2786	9-Hydroxy-10,12,15-octadecatrienoic acid*	Lipids	Free fatty acids
Wcdp007789	9-Oxooctadeca-10,12-Dienoic Acid	Lipids	Free fatty acids
pmb1574	9,12-Octadecadien-6-Ynoic Acid	Lipids	Free fatty acids
MWS0552	Cis-10-Pentadecenoic Acid(C15:1)	Lipids	Free fatty acids
pmb2640	Dodecanoic acid (Lauric acid)	Lipids	Free fatty acids
Lmbn005487	12,13-DHOME; (9Z)-12,13-Dihydroxyoctadec-9-enoic acid	Lipids	Free fatty acids
pmf0297	1-Eicosanol	Lipids	Free fatty acids
Wcsn010524	8,11-Heptadecadienoic acid	Lipids	Free fatty acids
Lmbn005287	7S,8S-DiHODE; (9Z,12Z)-(7S,8S)-Dihydroxyoctadeca-9,12-dienoic acid*	Lipids	Free fatty acids
MWS80007	13-Hydroperoxy-9Z,11E-octadecadienoic acid*	Lipids	Free fatty acids
pmb0885	4-Oxo-9Z,11Z,13E,15E-Octadecatetraenoic Acid	Lipids	Free fatty acids
pmb2787	9-Oxo-10E,12Z-octadecadienoic acid*	Lipids	Free fatty acids
MW0014090	3-Hydroxyhexadecanoic acid	Lipids	Free fatty acids
Zmyn004943	Norlinolenic acid	Lipids	Free fatty acids
Lmbn005443	13-KODE; (9Z,11E)-13-Oxooctadeca-9,11-dienoic acid*	Lipids	Free fatty acids
pmn001606	Eicosenoic acid	Lipids	Free fatty acids
Zmpn003368	13S-Hydroxy-9Z,11E,15Z-octadecatrienoic acid	Lipids	Free fatty acids
pmb2636	8,15-Dihydroxy-5,9,11,13-eicosatetraenoic acid	Lipids	Free fatty acids
Lmyn012331	Petroselinic acid*	Lipids	Free fatty acids
Wcdp007645	9-Oxo-10,12-Octadecadienoic Acid*	Lipids	Free fatty acids
MW0017099	9s,13r-12-Oxophytodienoic Acid	Lipids	Free fatty acids
Wcdp006870	13(s)-hydroperoxy-(9z,11e,15z)-octadecatrienoic acid	Lipids	Free fatty acids
MWSslk133	1,14-Tetradecanedioic Acid	Lipids	Free fatty acids
pmf0293	1-Octadecanol	Lipids	Free fatty acids
Lmcn009122	(7Z)-Hexadecenoic acid*	Lipids	Free fatty acids
mws0361	Palmitoleic Acid*	Lipids	Free fatty acids
mws2623	11-Octadecanoic acid(Vaccenic acid)*	Lipids	Free fatty acids
MW0015479	12(13)Ep-9-KODE	Lipids	Free fatty acids
MWSslk132	Hexadecanedioic acid	Lipids	Free fatty acids
mws0396	Elaidic Acid*	Lipids	Free fatty acids
Lmcn009539	E,E,Z-1,3,12-Nonadecatriene-5,14-diol	Lipids	Free fatty acids
mws5045	12-Hydroxydodecanoic acid	Lipids	Free fatty acids
Lcsn002223	2-[(1R,2R)-3-oxo-2-[(Z)-5-[3,4,5-trihydroxy-6-(hydroxymethyl)oxan-2-yl]oxypent-2-enyl]cyclopentyl]acetic acid	Lipids	Free fatty acids
Wcdp010180	Parinaraldehyde	Lipids	Free fatty acids
MWSHC20116	10,12-Octadecadienoic acid,2,3-dihydroxypropyl ester,(10E,12Z)-	Lipids	Free fatty acids
pmb0889	Punicic acid (9Z,11E,13Z-octadecatrienoic acid)	Lipids	Free fatty acids
Zmyn005384	2R-Hydroxyoctadecanoic Acid*	Lipids	Free fatty acids
MW0012382	Isopalmitic acid	Lipids	Free fatty acids
Hmqn004825	Rabdosia acid A*	Lipids	Free fatty acids
Lmyn007883	9,16-Dihydroxypalmitic acid	Lipids	Free fatty acids
Hmqp005455	15(R)-Hydroxylinoleic Acid*	Lipids	Free fatty acids
Hmqp005411	9-Oxo-12Z-Octadecenoic acid*	Lipids	Free fatty acids
Zbfn013528	(R)-Beta-Hydroxypalmitic Acid*	Lipids	Free fatty acids
Lmyn007622	9,10,18-Trihydroxystearic acid	Lipids	Free fatty acids
MWSmce689	Methyl linolenate	Lipids	Free fatty acids
Zmjn003398	2-Dodecenedioic acid	Lipids	Free fatty acids
mws0359	Pentadecanoic Acid	Lipids	Free fatty acids
Wmmn002441	(E)-Linalool-1-oic acid	Lipids	Free fatty acids
Sazp010264	Monogalactosyldiacylglycerol	Lipids	Free fatty acids
MWS4295	DL-2-hydroxystearic acid*	Lipids	Free fatty acids
pmp001260	N-(2-Hydroxyethyl)eicosapentaenoic acid	Lipids	Free fatty acids
pmb1650	Octadeca-11E,13E,15Z-trienoic acid	Lipids	Free fatty acids
mws0474	Dodecanedioic aicd	Lipids	Free fatty acids
MW0015472	9-nitro-9E-octadecenoic acid	Lipids	Free fatty acids
ZbBn003623	3-(3,4,5-Trihydroxyphenethyl)-5-(8-hydroxyoctyl)-ShikimicAcid	Lipids	Free fatty acids
MWSslk080	10-Hydroxydecanoic acid	Lipids	Free fatty acids
