# Supplementary material for: Genome-Wide Analysis of R2R3-MYB Genes and Functional Characterization of SmMYB75 in Eggplant Fruit Implications for Crop Improvement and Nutritional Enhancement
Source: Int J Mol Sci. 2024 Jan 18;25(2):1163. doi: 10.3390/ijms25021163 (PMC10816229; doi:10.3390/ijms25021163)
Supplement: Supplementary file 1 [file ijms-25-01163-s001.zip › Table S9.xlsx]

## Sheet: Supplementary Table S9
Supplementary Table S9. Information on all significantly different metabolites.
Index	Compounds	Class I	Class II	MYB75_vs_WT_Type
mws0221	L-Cystine	Amino acids and derivatives	Amino acids and derivatives	up
Lmrj002244	Cyclo(Pro-Pro)	Amino acids and derivatives	Amino acids and derivatives	up
MW0153885	Methionylvaline	Amino acids and derivatives	Amino acids and derivatives	up
pme3351	Allysine(6-Oxo DL-Norleucine)	Amino acids and derivatives	Amino acids and derivatives	up
Zbqp002414	h-gamma-Glu-leu-oh	Amino acids and derivatives	Amino acids and derivatives	up
Lmhp001430	Cyclo(Pro-Glu)	Amino acids and derivatives	Amino acids and derivatives	up
pme0253	N-Acetyl-L-leucine	Amino acids and derivatives	Amino acids and derivatives	up
Hmsp000364	L-Cyclopentylglycine	Amino acids and derivatives	Amino acids and derivatives	up
pme0006	L-Proline*	Amino acids and derivatives	Amino acids and derivatives	up
mws4516	Pyroglutamic acid	Amino acids and derivatives	Amino acids and derivatives	up
Zmdp001663	γ-glutamylmethionine	Amino acids and derivatives	Amino acids and derivatives	up
Lmsn003111	1-O-p-Coumaroyl-β-D-glucose*	Phenolic acids	Phenolic acids	up
Lmfn003035	6-O-p-Coumaroyl-β-D-glucose*	Phenolic acids	Phenolic acids	up
pmb3074	5-O-p-Coumaroylquinic acid*	Phenolic acids	Phenolic acids	up
Lmyn002788	Methyl gallate*	Phenolic acids	Phenolic acids	up
pme0309	3-O-Methylgallic Acid*	Phenolic acids	Phenolic acids	up
pmb3066	5-O-p-Coumaroylshikimic acid O-glucoside	Phenolic acids	Phenolic acids	up
Lmhn002574	Caffeoyl(p-Hydroxybenzoyl)tartaric acid	Phenolic acids	Phenolic acids	up
Lman002731	Grevilloside F	Phenolic acids	Phenolic acids	up
Zmhn001703	5-O-Galloyl-D-hamamelose*	Phenolic acids	Phenolic acids	up
Jmwp003339	2-Phenylethy-1-O-β-D-glucoside	Phenolic acids	Phenolic acids	up
MWSmce248	3-Hydroxycinnamic Acid*	Phenolic acids	Phenolic acids	up
Lmbn002648	α-Hydroxycinnamic Acid*	Phenolic acids	Phenolic acids	up
Lmtn002233	Androsin	Phenolic acids	Phenolic acids	up
Lakn003294	2-β-D-Glucopyranosyloxy-5-hydroxyphenylacetic acidmethylester	Phenolic acids	Phenolic acids	up
Hmqp002567	4-Hydroxycinnamic acid p-hydroxyphenethylamine*	Phenolic acids	Phenolic acids	up
Lmyp003371	3,5-Dihydroxytoluene	Phenolic acids	Phenolic acids	up
Zmhn002750	4-O-(6'-O-Glucosylcaffeoyl)-4-hydroxybenzoic acid	Phenolic acids	Phenolic acids	up
Lmtn000940	1-O-(3,4-Dihydroxy-5-methoxy-benzoyl)-glucoside	Phenolic acids	Phenolic acids	up
Cmzn005970	Dunalianoside A*	Phenolic acids	Phenolic acids	up
Lmsn002288	1-O-Caffeoyl-(6-O-glucosyl)-β-D-glucose	Phenolic acids	Phenolic acids	up
Wasn005799	3-Galloyl-6-O-Benzoyl Glucose*	Phenolic acids	Phenolic acids	up
Zmhn002508	4-p-Cumaroyl-rhamnosyl-(1→6)-D-glucose	Phenolic acids	Phenolic acids	up
Ymjm000148	Salidroside	Phenolic acids	Phenolic acids	up
Wasn005592	2-Galloyl-6-O-Benzoyl Glucose*	Phenolic acids	Phenolic acids	up
Cmzn005251	6-O-Caffeoylarbutin	Phenolic acids	Phenolic acids	up
pma6460	4-O-p-Coumaroylquinic acid	Phenolic acids	Phenolic acids	up
pmb2928	Gallic acid-4-O-glucoside	Phenolic acids	Phenolic acids	up
MWSmce346	1,3-O-Dicaffeoylquinic Acid (Cynarin)*	Phenolic acids	Phenolic acids	up
Lmsn004322	1,6-Di-O-caffeoyl-β-D-glucose	Phenolic acids	Phenolic acids	up
Hmtn001120	5-(2-Hydroxyethyl)-2-O-glucosylphenol	Phenolic acids	Phenolic acids	up
Li512115	Isochlorogenic acid B	Phenolic acids	Phenolic acids	up
Zbfn005376	2-Caffeoyl-6-(4-hydroxycinnamoyl)glucoside	Phenolic acids	Phenolic acids	up
Wmyn000217	2,6-dimethoxy-hydroquinone-4-O-β-D-glucopyranoside	Phenolic acids	Phenolic acids	up
pmb3064	3-O-p-Coumaroylquinic acid-O-glucoside	Phenolic acids	Phenolic acids	up
Xmyn004302	Ginkgoside A	Phenolic acids	Phenolic acids	up
Zmln000668	Monogalloyl-diglucose	Phenolic acids	Phenolic acids	up
Lmgp003989	Dicaffeoylshikimic acid	Phenolic acids	Phenolic acids	up
Lmsn002247	1-O-Salicyloyl-β-D-glucose*	Phenolic acids	Phenolic acids	up
mws1200	p-Coumaric acid methyl ester	Phenolic acids	Phenolic acids	up
pmn001511	3-Hydroxy-5-Methylphenol-1-O-Glucoside	Phenolic acids	Phenolic acids	up
Cmzn004594	Dunalianoside C*	Phenolic acids	Phenolic acids	up
Lmsn003778	1-O-Caffeoyl-4-O-galloyl-β-D-glucose	Phenolic acids	Phenolic acids	up
pmb3072	3-O-p-Coumaroylshikimic acid-O-glucoside	Phenolic acids	Phenolic acids	up
Hmtn001302	Glucosyloxybenzoic acid*	Phenolic acids	Phenolic acids	up
Lmhn003074	Feruloylmalic acid	Phenolic acids	Phenolic acids	up
mws0853	Sinapyl alcohol	Phenolic acids	Phenolic acids	up
MWSmce328	Isochlorogenic acid C*	Phenolic acids	Phenolic acids	up
Hmln002597	Sodium ferulate	Phenolic acids	Phenolic acids	up
Lmhn006533	Awsoniaside B	Phenolic acids	Phenolic acids	up
Hmln000873	2-O-Galloyl-D-glucose	Phenolic acids	Phenolic acids	up
Zmhn001358	4-O-Glucosyl-4-hydroxybenzoic acid*	Phenolic acids	Phenolic acids	up
mws1715	Cordycepin (3'-Deoxyadenosine)*	Nucleotides and derivatives	Nucleotides and derivatives	up
Zmjn001030	Adenosine 2'-Phosphate	Nucleotides and derivatives	Nucleotides and derivatives	up
MWS4354	N6-methyladenosine	Nucleotides and derivatives	Nucleotides and derivatives	up
MWSmce116	5'-Deoxyadenosine*	Nucleotides and derivatives	Nucleotides and derivatives	up
pmb2507	2-Deoxyribose-1-phosphate	Nucleotides and derivatives	Nucleotides and derivatives	up
Zmjp000966	Vidarabine*	Nucleotides and derivatives	Nucleotides and derivatives	up
mws0248	Uridine	Nucleotides and derivatives	Nucleotides and derivatives	up
MWSHC2054	Adenine	Nucleotides and derivatives	Nucleotides and derivatives	up
mws0847	1-Methyladenine	Nucleotides and derivatives	Nucleotides and derivatives	up
pme0033	Hypoxanthine	Nucleotides and derivatives	Nucleotides and derivatives	up
pme1119	Inosine	Nucleotides and derivatives	Nucleotides and derivatives	up
pme1173	Allopurinol	Nucleotides and derivatives	Nucleotides and derivatives	up
pmb0374	2-Aminopurine	Nucleotides and derivatives	Nucleotides and derivatives	up
ML10180524	Cytarabine	Nucleotides and derivatives	Nucleotides and derivatives	up
MWS5173	Isocytosine	Nucleotides and derivatives	Nucleotides and derivatives	up
HJN055	Dihydrocharcone-4'-O-glucoside*	Flavonoids	Chalcones	up
mws2118	Phloretin-2'-O-glucoside (Phlorizin)	Flavonoids	Chalcones	up
Zbpn005555	Phloretin-4'-O-glucoside (Trilobatin)*	Flavonoids	Chalcones	up
HJN090	Butin-7-O-glucoside*	Flavonoids	Flavanones	up
Jmgn004021	6-C-Glucosyl-2-Hydroxynaringenin	Flavonoids	Flavanones	up
mws0914	3,5,7-Trihydroxyflavanone (Pinobanksin)	Flavonoids	Flavanonols	up
HJN104	Dihydromyricetin-3-O-glucoside	Flavonoids	Flavanonols	up
Lmtn002796	Aromadendrin-7-O-glucoside*	Flavonoids	Flavanonols	up
Zmjp004852	5,6,3',4'-Tetrahydroxy-3,7-dimethoxyflavone-6-O-glucoside*	Flavonoids	Flavones	up
Hmmp002073	Apigenin-7-O-rutinoside-4'-O-Sophoroside*	Flavonoids	Flavones	up
Lmtp003948	3',5',5,7-Tetrahydroxy-4'-methoxyflavanone-3'-O-glucoside	Flavonoids	Flavones	up
Hmmn003584	Luteolin-7-O-rutinoside-5-O-rhamnoside	Flavonoids	Flavones	up
Lmyp005841	Chrysin-7-O-glucoside	Flavonoids	Flavones	up
mws0032	Myricetin	Flavonoids	Flavonols	up
Lmmp003271	Gossypetin-8-O-glucoside	Flavonoids	Flavonols	up
mws0856	Quercetin-4'-O-glucoside (Spiraeoside)	Flavonoids	Flavonols	up
Lmwp003442	Amoenin	Flavonoids	Flavonols	up
Lmmp001947	Gossypetin-3-O-glucoside*	Flavonoids	Flavonols	up
Zbsp004862	Syringetin-3-O-glucoside*	Flavonoids	Flavonols	up
Lmpp003465	Myricetin-3-O-β-D-glucoside	Flavonoids	Flavonols	up
Lmsn002815	Kaempferol-3-O-rutinoside(Nicotiflorin)	Flavonoids	Flavonols	up
Lmdp002969	Myricetin-3-O-galactoside*	Flavonoids	Flavonols	up
Lmbp002592	Kaempferol-3,7-O-diglucoside	Flavonoids	Flavonols	up
Lmfp003403	Quercetagetin-7-O-glucoside(Quercetagitrin)*	Flavonoids	Flavonols	up
mws0059	Quercetin-3-O-rutinoside (Rutin)	Flavonoids	Flavonols	up
Hmcp001919	Isorhamnetin-3-O-(6''-acetylglucosyl)(1→3)-glucoside	Flavonoids	Flavonols	up
pmn001583	Quercetin-3-O-robinobioside	Flavonoids	Flavonols	up
mws1422	Epiafzelechin	Flavonoids	Flavanols	up
Lmmp000897	Gallocatechin-(4α→8)-gallocatechin	Flavonoids	Flavanols	up
Lmqn005782	4,5,8-Trihydroxy-α-tetralone	Quinones	Quinones	up
Wchn003984	1,4,8-Trihydroxynaphthalene-1-O-glucoside*	Quinones	Naphthol	up
Wbmp002739	Vitexdoin E	Lignans and Coumarins	Lignans	up
Lazn005469	Buddlenol F glucoside	Lignans and Coumarins	Lignans	up
WaYn005957	Hedyotol C*	Lignans and Coumarins	Lignans	up
Zmpn002553	Cichoriin*	Lignans and Coumarins	Coumarins	up
pmb1207	O-Feruloyl 3-hydroxycoumarin	Lignans and Coumarins	Coumarins	up
Zbsp004940	6-Hydroxy-7-methoxycoumarin*	Lignans and Coumarins	Coumarins	up
Lmbp102601	7-Hydroxycoumarin;Umbelliferone*	Lignans and Coumarins	Coumarins	up
Lcyp000672	Mahaleboside	Lignans and Coumarins	Coumarins	up
Jmzn006005	3,4-methylenedioxy cinnamyl alcohol	Others	Alcohol compounds	up
Wcdn001824	2-Hydroxy-5-[3,4,5-Trihydroxy-6-(Hydroxymethyl)Oxan-2-Yl]Oxybenzoic Acid	Others	Others	up
Wcfn003424	Coumaroyl Quinic Acid*	Others	Others	up
Hmyp002315	3,5,7,4'-Tetrahydroxy-Coumaronochromone	Others	Chromone	up
MW0112142	2'-Fucosyl-D-lactose	Others	Saccharides	up
Yacp000453	3-hydroxy-1-methylpyrrolidin-2-one*	Alkaloids	Pyrrole alkaloids	up
MWStz040	Pterolactam*	Alkaloids	Pyrrole alkaloids	up
pmn001724	Lycibarbarspermidine B	Alkaloids	Phenolamine	up
Wafp002146	1-Pyrrolizino-3-(3,4-Dihydroxyphenyl)-2-Propene-1-One	Alkaloids	Phenolamine	up
Lmmp001993	Dihydrocaffeoylspermine	Alkaloids	Phenolamine	up
MWSmce089	p-Coumaroyltyramine*	Alkaloids	Phenolamine	up
pmb0323n	N-Caffeoylputrescine	Alkaloids	Phenolamine	up
Lmmp002914	Bis(Dihydrocaffeoyl)spermidine	Alkaloids	Phenolamine	up
Wafp003258	N-Feruloylphenylacetamide glucoside	Alkaloids	Phenolamine	up
Lmmp001410	Dihydrocaffeoylputrescine	Alkaloids	Phenolamine	up
pmb0490	p-Coumaroylputrescine	Alkaloids	Phenolamine	up
Hmgp002804	N1,N10-Dihydrocaffeoylspermidine	Alkaloids	Phenolamine	up
Qagp003587	N-Monocinnamoylputrescine*	Alkaloids	Phenolamine	up
pmn001720	Lycibarbarspermidine C	Alkaloids	Phenolamine	up
Lahp003147	N,N-cinnamoylbutanediamine*	Alkaloids	Phenolamine	up
Lmmp003167	Bis(Caffeoyl)Spermidine	Alkaloids	Phenolamine	up
Lmmp002023	Caffeoylspermine	Alkaloids	Phenolamine	up
Lmmp003112	Caffeoyl-dihydrocaffeoyl spermidine	Alkaloids	Phenolamine	up
MWS1749	p-Aminoanisole	Alkaloids	Phenolamine	up
Labp005146	Isoalangiside	Alkaloids	Quinorisidine alkaloids	up
Yhjp002824	Lythridine	Alkaloids	Quinorisidine alkaloids	up
pmp001196	Calystegine A3	Alkaloids	Tropan alkaloids	up
pmp001195	Calystegine B1	Alkaloids	Tropan alkaloids	up
MWStz135	Pseudotropine	Alkaloids	Tropan alkaloids	up
pmp000097	Guvacoline	Alkaloids	Piperidine alkaloids	up
Qmhp120619	Paxiphylline D	Alkaloids	Alkaloids	up
Wbsp000161	Lannotinidine C	Alkaloids	Alkaloids	up
Lamp000484	4-Methylazetidine-2-Carboxylic acid*	Alkaloids	Alkaloids	up
Wbmp007680	5,6,6a,7-tetrahydro-1,2,9,10-tetraethoxy-6-n-pentyl-4H-dibenzo[de,g]quinolin-4-ol	Alkaloids	Alkaloids	up
Wbjp001169	o-Carboxy-5-hydroxytryptamine	Alkaloids	Alkaloids	up
Wbmp002777	Delsoline	Alkaloids	Terpenoid alkaloids	up
mws0103	Indole-3-carboxaldehyde	Alkaloids	Plumerane	up
mws0005	Tryptamine	Alkaloids	Plumerane	up
Hmmp002701	β2-Solanine	Alkaloids	Steroid alkaloids	up
pmp001022	Tortifoline	Alkaloids	Steroid alkaloids	up
Qmyp101401	11,12-O-Isopropyfidenesolajiangxin F	Terpenoids	Sesquiterpenoids	up
Qmyp101336	JiangxiBaiyingsu I	Terpenoids	Sesquiterpenoids	up
Lmmn006706	9α-Ethoxy-8β-(2-isobutyryloxy)-14-oxo-acanthospermolide*	Terpenoids	Sesquiterpenoids	up
Jmcn007353	1β,9β-dihydroxy-4αH-eudesmane-5,11(13)-dien-12-oic acid	Terpenoids	Sesquiterpenoids	up
Lmjn003979	Catalposide*	Terpenoids	Monoterpenoids	up
Lmjn004153	6'-O-p-Hydroxybenzoylcatalpol*	Terpenoids	Monoterpenoids	up
Smnn005560	Oleuropein	Terpenoids	Monoterpenoids	up
Yajn002747	Posoquenin	Terpenoids	Monoterpenoids	up
Wmsn000915	teufruintin B	Terpenoids	Ditepenoids	up
MWSmce406	16-Hydroxy-24-methylene-3-oxolanosta-7,9(11)-diene-21-oic acid (Polyporenic acid C)	Terpenoids	Triterpene	up
Lmmn009932	3-Hydroxy-24-methylene-9,19-cyclolanostan-26-oic acid (Ambolic acid)	Terpenoids	Triterpene	up
Wbhp008502	Tagalsin Q	Terpenoids	Terpene	up
Wbhp009564	Methyl 8,9-epoxypimaran-18-oate	Terpenoids	Terpene	up
MW0113143	4-O-beta-D-glucosyl-4-coumaric acid*	Organic acids	Organic acids	up
Lmbn001467	5-Acetamidopentanoic Acid	Organic acids	Organic acids	up
Zbqp000579	2-amino-3-(1H-pyrazol-1-yl)propanoic acid*	Organic acids	Organic acids	up
MWS0811	L-Pipecolic Acid*	Organic acids	Organic acids	up
MW0106444	Dihydrofolic acid	Organic acids	Organic acids	up
Zmcp010827	Spirost-5-en-3-ol (Diosgenin)*	Steroids	Steroid	up
mws1365	Furost-5-en-3,22,26-triol-3-O-rhamnosyl(1→2)[rhamnosyl(1→4)]glucoside-26-O-glucoside (Protodioscin)	Steroids	Steroidal saponins	up
zjbp120108	5(6)-En-spirost-3-ol-3-O-glucosyl-(1→4)-[rhamnosyl-(1→2)]-galactoside*	Steroids	Steroidal saponins	up
Zjhp082615	iso-Diosgenin-Gal	Steroids	Steroidal saponins	up
Hmdp003401	Trillin-6'-O-glucoside*	Steroids	Steroidal saponins	up
Zjbp081711	3-Hydroxyspirost-6-one-3-O-rhamnosyl-(1→2)-glucoside*	Steroids	Steroidal saponins	up
Wajp005655	23-Methylspirosta-5-Ene-3beta-Ol 3-O-glucosyl-rhamnosyl-rhamnosyl-glucoside	Steroids	Steroidal saponins	up
Zjcp102009	Diosgenin-Glc-Glc-Rha-Rha*	Steroids	Steroidal saponins	up
Zmcp005801	Diosgenin-3-O-glucosyl(1→4)rhamnosyl(1→4)rhamnosyl(1→2)glucoside*	Steroids	Steroidal saponins	up
Latp005116	(25R)-26-O-β-D-Glucopyranosyl-furost-5,20-diene-3β,26-diol-3-O-[α-L-rhamnopyranosylAcetyl-(1-2)]-[α-L-rhamnopyranosyl-(1-4)]-β-D-glucopyranoside*	Steroids	Steroidal saponins	up
Zjhp082626	Yamogenin-Glc-Glc*	Steroids	Steroidal saponins	up
Zjmp101909	isodiosgenin-Glc-Glc	Steroids	Steroidal saponins	up
Zjhp082613	Diosgenin-Glc	Steroids	Steroidal saponins	up
Zjhp082628	Diosgenin-Gal-Glc	Steroids	Steroidal saponins	up
Jmyp004233	Spirost-5-en-3-ol-3-O-glucosyl(1→4)galactoside*	Steroids	Steroidal saponins	up
Zjbp081703	3-hydroxy-5,20-diene-26 furostanol-Glc	Steroids	Steroidal saponins	up
Wdbn009958	21-hydroperoxy-8-hydroxy-5,19-dimethyl-15,18,20-trioxapentacyclo[14.5.1.04,13.05,10.019,22]docosa-1,10-dien-14-one*	Steroids	Steroidal saponins	up
Zjzp081813	Timosaponin A	Steroids	Steroidal saponins	up
Zjhp082614	iso-Diosgenin-Glc	Steroids	Steroidal saponins	up
pmb0296	1-Oleoyl-Sn-Glycerol	Lipids	Glycerol ester	up
MEDL00392	1-(9Z-octadecenoyl)-sn-glycero-3-phosphocholine	Lipids	LPC	up
Lmhp010515	LysoPC 17:0(2n isomer)*	Lipids	LPC	up
Lmhp010190	LysoPC 18:1(2n isomer)	Lipids	LPC	up
pmb0880	LysoPE 18:0(2n isomer)	Lipids	LPE	up
Waln011704	1-(2,3-dihydroxypropoxy)-3-(((2-(dimethylamino)ethoxy)(hydroxy)phosphoryl)oxy)propan-2-yl (Z)-14-Octadecenoic Acid	Lipids	LPE	up
Lmhp009769	LysoPE 17:1*	Lipids	LPE	up
WaYn011395	2-(2,3-dihydroxypropoxy)-3-(((2-(dimethylamino)ethoxy)(hydroxy)phosphoryl)oxy)propan-2-yl (Z)-14-Octadecenoic Acid	Lipids	LPE	up
pmb0856	LysoPE 18:1(2n isomer)*	Lipids	LPE	up
Lmyn012331	Petroselinic acid*	Lipids	Free fatty acids	up
MW0015472	9-nitro-9E-octadecenoic acid	Lipids	Free fatty acids	up
MWS80007	13-Hydroperoxy-9Z,11E-octadecadienoic acid*	Lipids	Free fatty acids	up
MWS80006	9-Hydroperoxy-9Z,11E-Octadecadienoic Acid	Lipids	Free fatty acids	up
Lmbn005287	7S,8S-DiHODE; (9Z,12Z)-(7S,8S)-Dihydroxyoctadeca-9,12-dienoic acid*	Lipids	Free fatty acids	up
pmb1574	9,12-Octadecadien-6-Ynoic Acid	Lipids	Free fatty acids	up
Wcdp006869	10-Methoxyheptadec-1-En-4,6-Diyne-3,9-Diol	Lipids	Free fatty acids	up
Zmyn004449	9-Hydroxy-12-oxo-10(E),15(Z)-octadecadienoic acid	Lipids	Free fatty acids	up
MWS2673	5,6-DiHETrE[(±)5,6-dihydroxy-8Z,11Z,14Z-eicosatrienoic acid]	Lipids	Free fatty acids	up
Wcdp007789	9-Oxooctadeca-10,12-Dienoic Acid	Lipids	Free fatty acids	up
mws2623	11-Octadecanoic acid(Vaccenic acid)*	Lipids	Free fatty acids	up
mws0396	Elaidic Acid*	Lipids	Free fatty acids	up
Zmmp002946	(3-(carboxyamino)-2-methylpropanoyl)phenylalanine*	Amino acids and derivatives	Amino acids and derivatives	down
MWSmce607	DL-Threonine	Amino acids and derivatives	Amino acids and derivatives	down
Zbqn003921	N-carboxy-N-(2-oxo-2-phenylethyl)-L-alanine	Amino acids and derivatives	Amino acids and derivatives	down
mws0629	L-Aspartyl-L-Phenylalanine	Amino acids and derivatives	Amino acids and derivatives	down
pme3382	N-Acetyl-L-threonine	Amino acids and derivatives	Amino acids and derivatives	down
mws0254	L-Histidine*	Amino acids and derivatives	Amino acids and derivatives	down
Wdtp003528	3,4,5-trihydroxy-6-[4-[[(2R)-5-oxooxolan-2-yl]methyl]phenoxy]oxane-2-carboxylic acid	Phenolic acids	Phenolic acids	down
Yshj000011	2,6-dimethoxy-4-hydroxyphenyl-1-O-beta-D-glucopyranoside	Phenolic acids	Phenolic acids	down
Lmsn003628	6'-O-Sinapoylsucrose*	Phenolic acids	Phenolic acids	down
Lmyn004515	3,4-Dimethoxycinnamic acid	Phenolic acids	Phenolic acids	down
pmb2936	Disinapoyl glucoside	Phenolic acids	Phenolic acids	down
Lmrgn03360	Cryptamygin B	Phenolic acids	Phenolic acids	down
Wdtp004079	3,4,5-Trihydroxy-6-[4-(4-methyl-3-oxopentyl)phenoxy]oxane-2-carboxylic acid	Phenolic acids	Phenolic acids	down
pme2828	4-Nitrophenol	Phenolic acids	Phenolic acids	down
Zmln000899	Syringaldehyde-4-O-glucoside	Phenolic acids	Phenolic acids	down
pmb2819	O-Caffeoyl maltotriose	Phenolic acids	Phenolic acids	down
Labn003679	(E)-caffeyl alcohol 4-O-β-D-glucopyranoside	Phenolic acids	Phenolic acids	down
Lmzn001582	5'-Glucosyloxyjasmanic acid*	Phenolic acids	Phenolic acids	down
pmn001671	Furanofructosyl-α-D-(6-mustard acyl)glucoside*	Phenolic acids	Phenolic acids	down
pmn001672	Furanofructosyl-α-D-(3-mustard acyl)glucoside*	Phenolic acids	Phenolic acids	down
Zmhn002227	4-O-Glucosyl-sinapate	Phenolic acids	Phenolic acids	down
pmn001690	3-Hydroxy-4-isopropylbenzylalcohol-3-O-glucoside	Phenolic acids	Phenolic acids	down
ML10179289	2-Phenylethanol	Phenolic acids	Phenolic acids	down
pmn001560	Cimicifugic acid A	Phenolic acids	Phenolic acids	down
Zmmp002106	4-methyl-1,5,2,3-dioxadiazinan-2-amine	Nucleotides and derivatives	Nucleotides and derivatives	down
mws0675	β-Nicotinamide mononucleotide	Nucleotides and derivatives	Nucleotides and derivatives	down
MWSslk146	4'-O-Glucosylvitexin	Flavonoids	Flavones	down
mws0072	Apigenin-5-O-glucoside	Flavonoids	Flavones	down
Lmdp004892	Kaempferol-3-O-(6''-malonyl)galactoside*	Flavonoids	Flavonols	down
mws2220	Gallocatechin 3-O-gallate	Flavonoids	Flavanols	down
Zbln003676	7-hydroxy-4-methoxyphenanthrene-2-O-glucoside	Quinones	PhenAnthraquinones	down
WaYn006596	Buddlenol C*	Lignans and Coumarins	Lignans	down
WaYn006734	Hedyotisol A	Lignans and Coumarins	Lignans	down
Lhhp102921	Magnolin	Lignans and Coumarins	Lignans	down
Wbwp006298	[(1R,11R,12R,13S)-13-(hydroxymethyl)-1-(3,4,5-trimethoxyphenyl)-5,7,14-trioxatetracyclo[9.2.1.02,10.04,8]tetradeca-2,4(8),9-trien-12-yl]methanol	Lignans and Coumarins	Lignans	down
WaYn006850	Buddlenol F*	Lignans and Coumarins	Lignans	down
Hmcn002743	Lirioresinol A	Lignans and Coumarins	Lignans	down
Lazn005628	Hedyotisol B	Lignans and Coumarins	Lignans	down
Zmdn003480	Cycloolivil-6-O-glucoside*	Lignans and Coumarins	Lignans	down
Wbmn004986	Lyoniresinol-3α-O-glucoside	Lignans and Coumarins	Lignans	down
Lmdn001925	Olivil-4'-O-glucoside*	Lignans and Coumarins	Lignans	down
MWS20152	Syringaresinol	Lignans and Coumarins	Lignans	down
MWSHC2047	Syringaresinol-4'-O-glucoside; Acanthoside B*	Lignans and Coumarins	Lignans	down
Hmln002355	5'-Methoxymatairesinoside*	Lignans and Coumarins	Lignans	down
Cmmp003887	Aketrilignoside B	Lignans and Coumarins	Lignans	down
Yalp002838	4-Methoxy-5-(hydroxymethyl)-2H-1-benzopyran-2-one*	Lignans and Coumarins	Coumarins	down
Cmpp003619	6,7-Dihydroxy-4-methylcoumarin	Lignans and Coumarins	Coumarins	down
Cmyp007180	Dihydroactinidiolide	Others	Lactones	down
ZbWn007525	(11E,14E)-16-hydroxyoctadeca-11,14,17-trienoic 4-methylbenzenesulfonic anhydride	Others	Others	down
Zbzp007397	5,6,7,7a-tetrahydro-4,4,7a-trimethyl-2(4H)-benzofuranone	Others	Others	down
Lchp000221	(Z)-3-Ethylidene-7-hydroxy-6-methoxyphthalide*	Others	Others	down
zjgp122326	Pyridine-4-formyl-O-β-D-glucopyranoside*	Others	Others	down
Wcfp003475	6,7-dimethyl-4-(2,3,4,5-tetrahydroxypentyl)-1H-quinoxaline-2,3-dione*	Others	Others	down
MWS0442	Maltotriose	Others	Saccharides	down
Wbsp000107	(2s)-2-[(5s)-5-hydroxyhexa-1,3-dien-1-yl]-5-methoxy-4-[(3r)-3-methoxybutanoyl]-2-methylfuran-3-one	Others	Ketone compounds	down
Lmmp003215	Icariside B2	Others	Ketone compounds	down
pmn001423	Roseoside	Others	Ketone compounds	down
pma1751	N-(beta-D-Glucosyl)nicotinate*	Others	Vitamin	down
MWSslk106	2-Phenylethylamine	Alkaloids	Benzylphenylethylamine alkaloids	down
Hmtn001358	2-(D-Glucosyloxy)-4-hydroxybenzeneacetonitrile	Alkaloids	Phenolamine	down
Lmlp002994	5-Hydroxyquinoline	Alkaloids	Quinoline alkaloids	down
Wccp002870	2-Amino-5-[(1-Carboxy-2-Phenylethyl)Amino]-5-Oxopentanoic acid*	Alkaloids	Alkaloids	down
Lchp000007	Zanthoamide B	Alkaloids	Alkaloids	down
Lszp210010	Tatarine*	Alkaloids	Alkaloids	down
pmb0069	Benzamide	Alkaloids	Alkaloids	down
Yalp003517	30-Hydroxyfraxinellone	Terpenoids	Sesquiterpenoids	down
Saln004300	methyl (2S,3R,4S)-3-ethenyl-4-[2-[(E)-3-(4-hydroxy-3-methoxyphenyl)prop-2-enoyl]oxyethyl]-2-[(2S,3R,4S,5S,6R)-3,4,5-trihydroxy-6-(hydroxymethyl)oxan-2-yl]oxy-3,4-dihydro-2H-pyran-5-carboxylate	Terpenoids	Monoterpenoids	down
Yalp008917	(3R,5R,7R,8R,10S,13S,17R)-17-((S)-7,7-dimethyl-2,3,6,7-tetrahydrooxepin-3-yl)-4,4,8,10,13-pentamethyl-2,3,4,5,6,7,8,9,10,11,12,13,16,17-tetradecahydro-1H-cyclopenta[a]phenanthrene-3,7-diyl diacetate	Terpenoids	Triterpene	down
MW0121650	5-Methyltetrahydrofolic acid	Organic acids	Organic acids	down
Zmpn000638	3-Guanidinopropionic acid	Organic acids	Organic acids	down
Sazp003601	Tuberonic acid glucoside*	Organic acids	Organic acids	down
pmd0157	LysoPG 18:1	Lipids	Glycerol ester	down
Lmqn008975	PA(18:2/0:0)	Lipids	Glycerol ester	down
pmb2406	LysoPC 17:0*	Lipids	LPC	down
Lmhp008273	LysoPE 15:1(2n isomer)*	Lipids	LPE	down
Lmhp008337	LysoPE 14:0(2n isomer)*	Lipids	LPE	down
WaYn011606	1-(2,3-dihydroxypropoxy)-3-(((2-(dimethylamino)ethoxy)(hydroxy)phosphoryl)oxy)propan-2-yl heptadecanoate	Lipids	LPE	down
Lmbn004685	5S,8R-DiHODE; (5S,8R,9Z,12Z)-5,8-Dihydroxyoctadeca-9,12-dienoate	Lipids	Free fatty acids	down
